# Supplementary material for: OTX2 represses sister cell fate choices in the developing retina to promote photoreceptor specification
Source: eLife journal article supplement (doi:10.7554/elife.54279), 2020-04-29

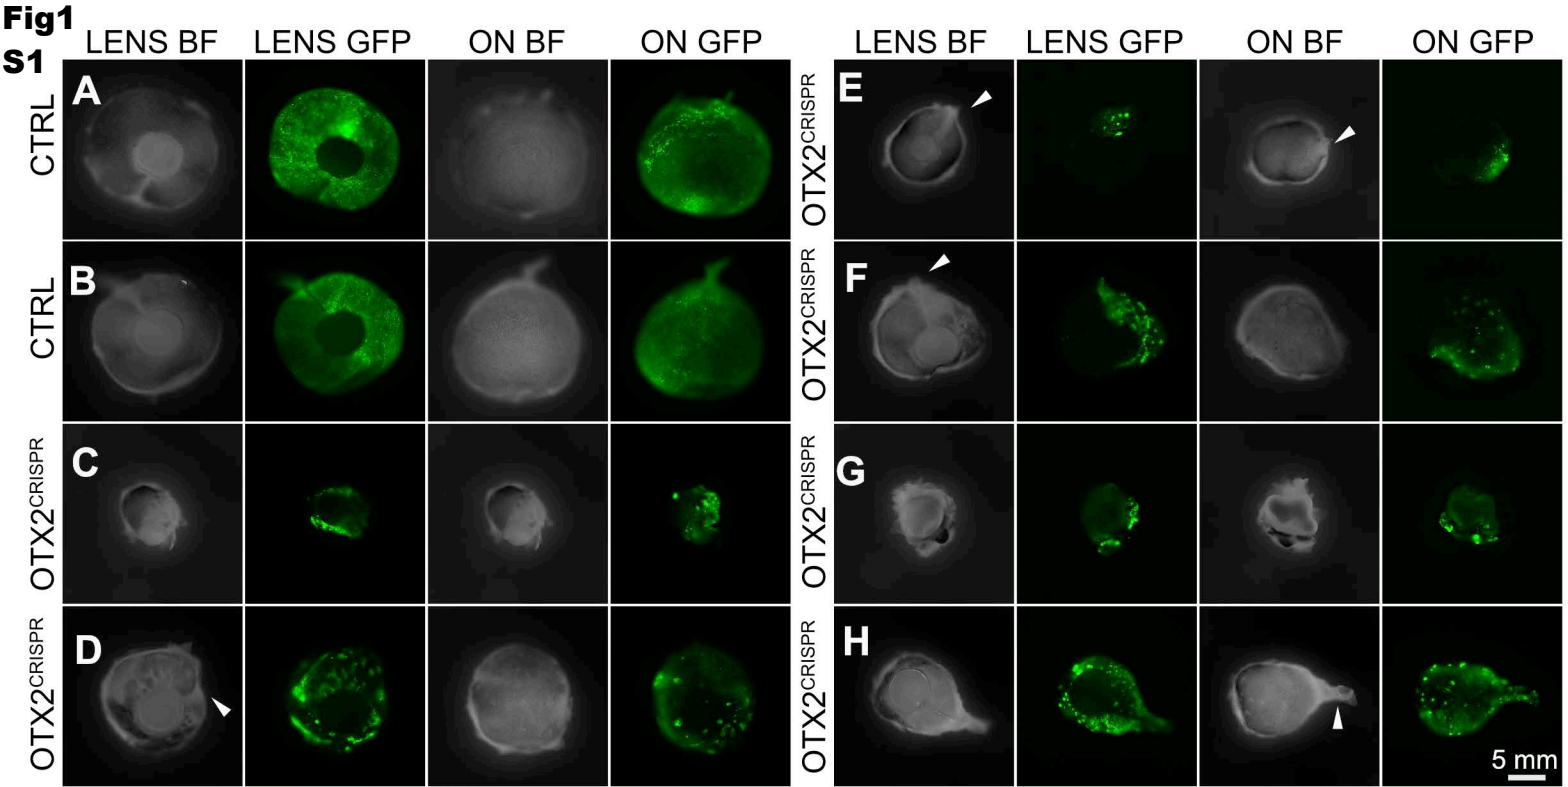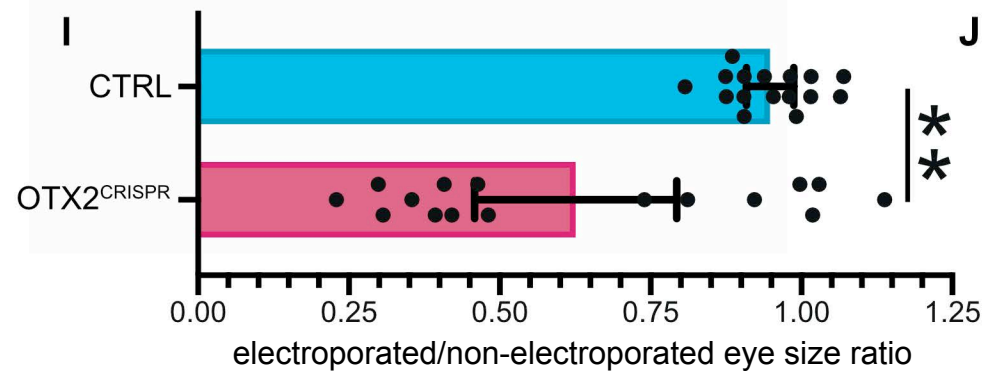

**J** Percentage of targeted eyes with the noted morphological defect

| Defect         | CTRL | OTX2 <sup>CRISPR</sup> |
|----------------|------|------------------------|
| Coloboma       | 0%   | 80%                    |
| Depigmentation | 0%   | 85%                    |
| Abnormal shape | 0%   | 50%                    |

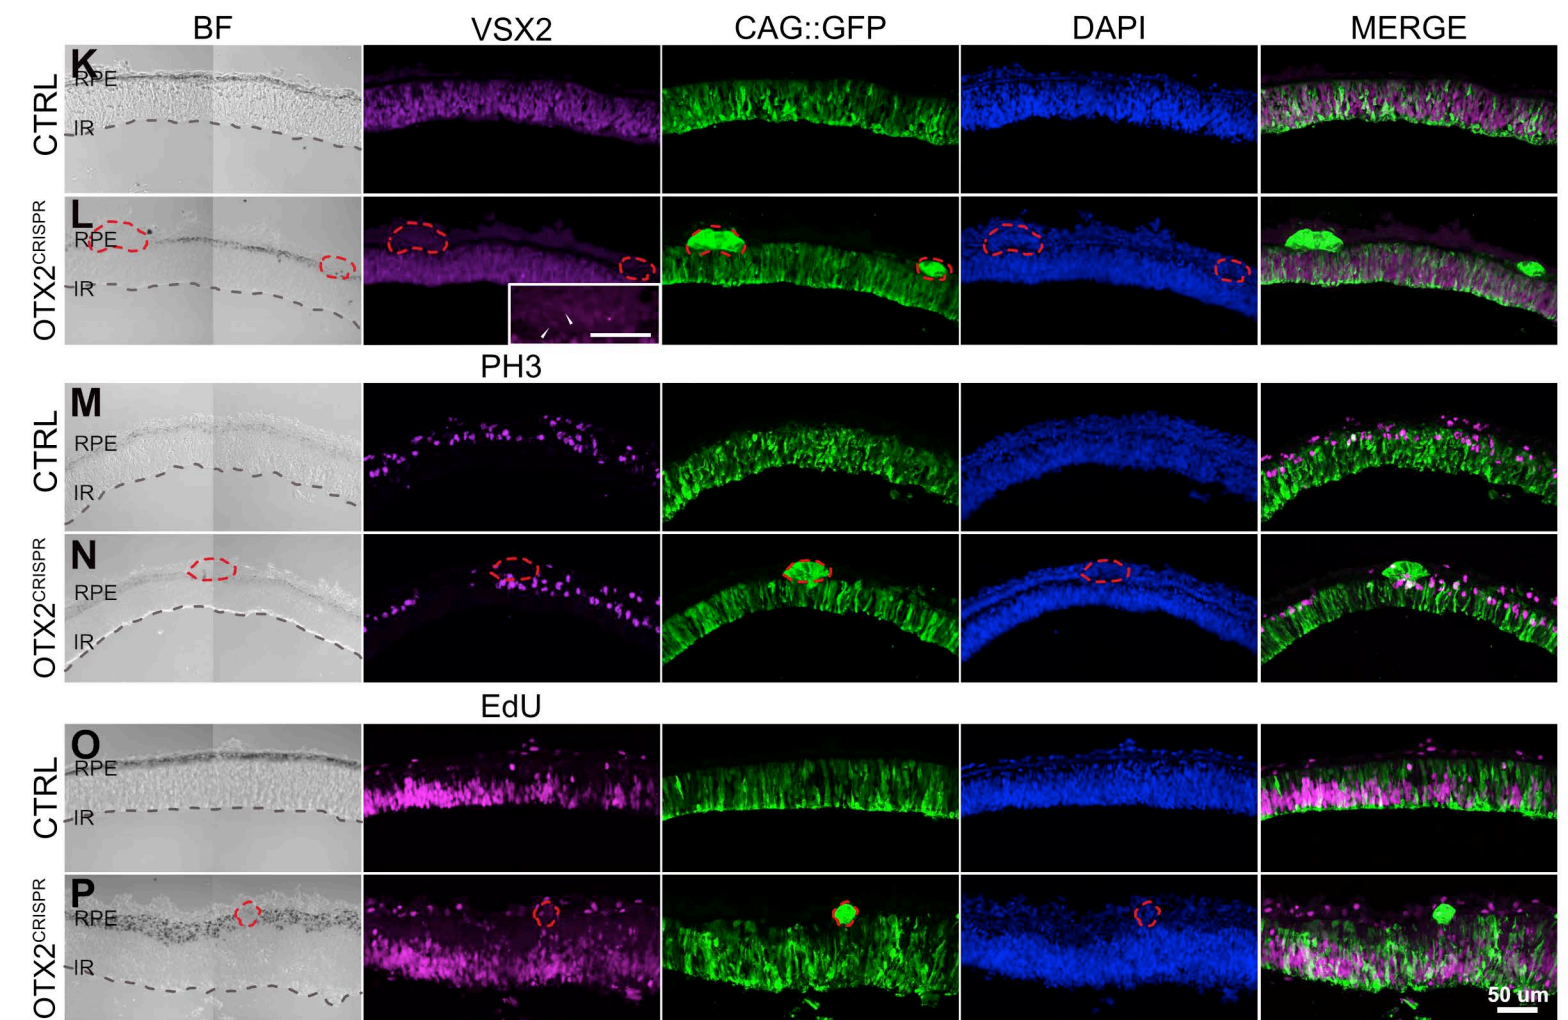

Supplement: supp [file elife-54279-supp-v1.zip]
