# Supplementary material for: OTX2 represses sister cell fate choices in the developing retina to promote photoreceptor specification
Source: eLife journal article supplement (doi:10.7554/elife.54279), 2020-04-29

**Figure 2 Supplement 1**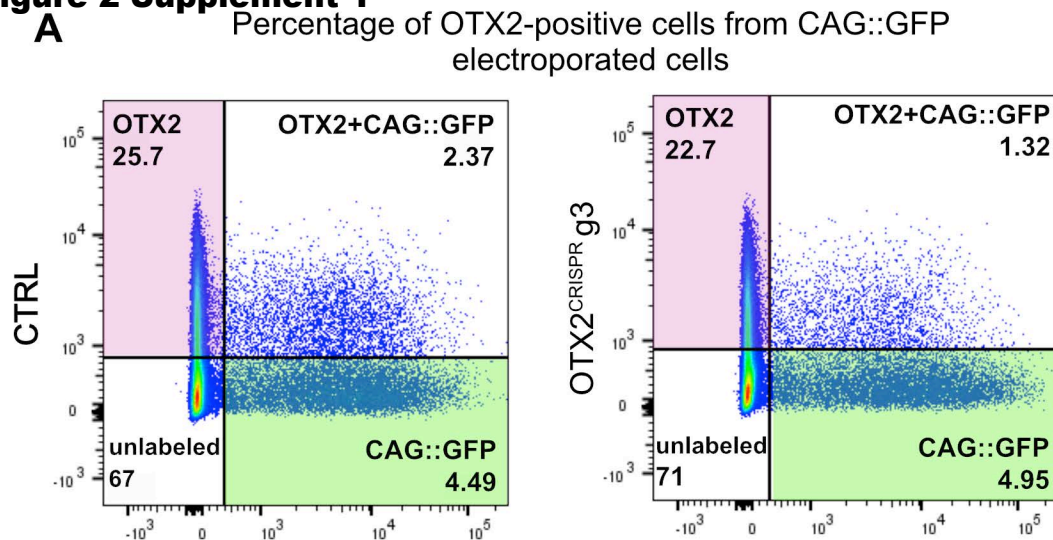

**B** Percentage of OTX2+ cells from CAG::GFP electroporated cells

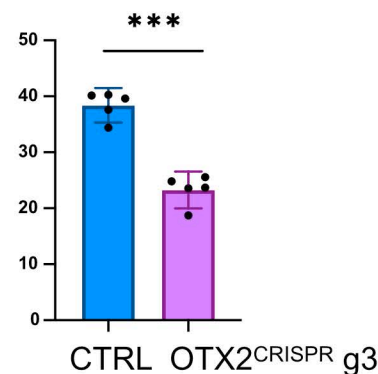

**C** Percentage of THRBCRM2:GFP-positive cells from CAG::tdT electroporated cells

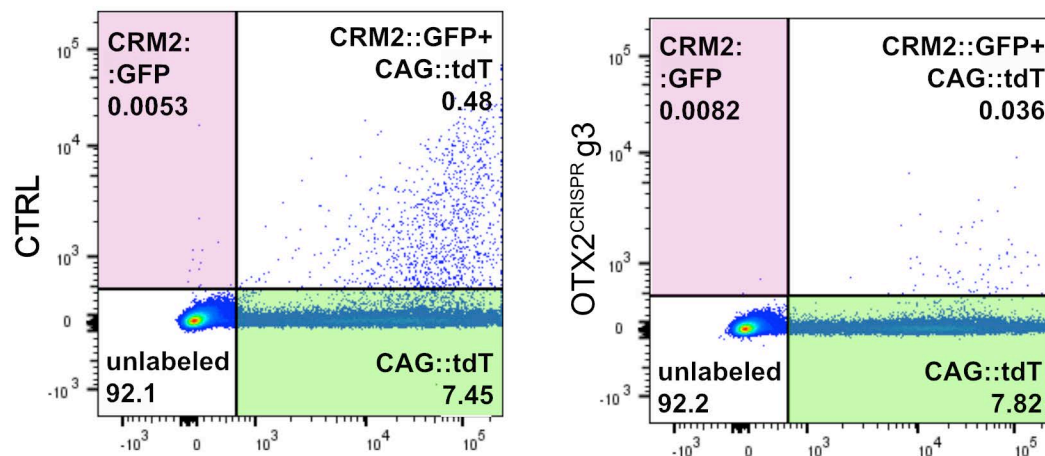

**D** Percentage of THRBCRM2:GFP+ cells from CAG::tdT electroporated cells

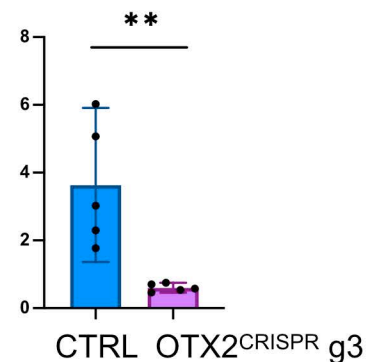

Supplement: supp [file elife-54279-supp-v1.zip]
