# Supplementary material for: OTX2 represses sister cell fate choices in the developing retina to promote photoreceptor specification
Source: eLife. 2020 Apr 29;9:e54279. doi: 10.7554/eLife.54279 (PMC7237216; doi:10.7554/eLife.54279)
Supplement: Supplementary file 1. [file elife-54279-supp1.xlsx]

## Sheet: Sheet1
Antibody name	Host Organism	Vendor	Catalog number	Dilution	Stock Concentration	RRID*
OTX2	Goat	R+D	AF1979	1 to 500	-	AB_1617988
OTX1+OTX2	Rabbit	Abcam	ab21990	1 to 500	-	AB_776930
PAX6	Mouse IgG1	DSHB	PAX6	1 to 1000	11.25 ug/ml	AB_528427
BRN3A	Mouse IgG1	DSHB	Mab1585	1 to 400	-	AB_94166
panBRN3	Mouse IgG1	SCBT	sc-390780	1 to 250	200 ug/ml	-
LIM1	Mouse IgG1	DSHB	4F2-C	1 to 15	57.25 ug/ml	AB_531784
ISL1	Mouse	DSHB	39.3F7	1 to 50	10.25 ug/ml	AB_1157901
PH3	Rabbit	Millipore	06-570	1 to 500	250 ug/ml	AB_10582726
VSX2	Sheep	Ex Alpha	x1180p	1 to 200	62.5 ug/ml	AB_2314191
B-GAL	Chick	Abcam	ab37382	1 to 1000	-	AB_307210
GFP	Rabbit	Invitrogen	A6455	1 to 500	-	AB_221570
RRID: Repository Resource ID, http://antibodyregistry.org/
