# Supplementary material for: OTX2 represses sister cell fate choices in the developing retina to promote photoreceptor specification
Source: eLife. 2020 Apr 29;9:e54279. doi: 10.7554/eLife.54279 (PMC7237216; doi:10.7554/eLife.54279)
Supplement: Supplementary file 2. [file elife-54279-supp2.xlsx]

## Sheet: Sheet1
Quantification	Represents	WT vs	Figure	Average WT (±95% C.I.) (%)	Average OTX2CRISPR g2 (±95% C.I.)	Average OTX2CRISPR g3 (±95% C.I.)	Statistical analysis	Significance	Dunnett Post Hoc comp. (WT vs)	Number of biological replicates (n)
Microphtalmia phenotype	Ratio of area of right right eye over area of left eye (non electroporated)	OTX2CRISPR g2	Suppl. 1I	0.94±0.03	0.62±0.15	-	ttest	p=0.0003		16
OTX2 protein (Goat antibody)	% from total number of electroporated cells	OTX2CRISPR g2	2D	40.42±3.89	19.78±3.15	-	ttest	p<0.0001		4
OTX2 protein (Rabbit antibody)	% from total number of electroporated cells	OTX2CRISPR g2	-	36.29±967	11.39±2.01	-	ttest	p=0.0026		4
OTX2 protein (Goat antibody)	% from total number of electroporated cells	OTX2CRISPR g3	Suppl. 2B	38.4±2.17	23.26±2.33	-	ttest	p<0.0001		5
PAX6 protein	% from total number of electroporated cells	OTX2CRISPR g2	2F	37.79±6.74	69.17±6.44	-	ttest	p<0.0001		5
THRBCRM2::GFP	% from total number of electroporated cells	OTX2CRISPR g2	2H	6.35±2.3	0.72±0.26	-	ttest	p=0.0013		5
THRBCRM2::GFP	% from total number of electroporated cells	OTX2CRISPR g3	Suppl. 2D	1.6±1.83	0.10±0.11	-	ttest	p=0.0061		5
OTX2 protein (Goat antibody)	% from total number of OTX2ECR2::GFP electroporated cells	OTX2CRISPR g2	3F	73.67±2.44	22.02±5.91	-	ttest	p<0.0001		4
OTX2 protein (Goat antibody)	% from total number of OTX2ECR2::GFP electroporated cells	OTX2CRISPR g3	3G	61.73±8.38	7.10±8.1	-	ttest	p<0.0001		5
POU4F1 protein	% from total number of POU4F1-electroporated cells	WT, OTX2CRISPR g2 and OTX2CRISPR g3	Suppl. 4G	1.03±1.21	0.38±0.75	1.04±1.35	ANOVA	n.s.	n.s.	3
LHX1 protein	% from total number of LHX1-electroporated cells	WT, OTX2CRISPR g2 and OTX2CRISPR g3	6I	4.85±0.48	14.61±2.2	9.79+1.83	ANOVA	p=0.006	g2=0.0003 g3=0.0097	3
RXRG protein	% from total number of RXRG-electroporated cells	WT, OTX2CRISPR g2 and OTX2CRISPR g3	6E	49.69±6.9	20.74±4.29	17.78±3.73	ANOVA	p<0.001	g2<0.0024 g3<0.0014	3
panPOU4F protein	% from total number of OTX2ECR2::GFP electroporated cells	WT, OTX2CRISPR g2 and OTX2CRISPR g3	6M	16.07±0.46	49.99±4.81	32.47±9.59	ANOVA	p=0.001	g2<0.001 g3=0.029	3
panPOU4F protein	% from total number of OTX2ECR2 lineage-traced cells	WT and OTX2CRISPR g2	7L	3.48±4.9 (st. dev.)	77.66±23.34 (st. dev.)	-	ttest	p<0.001		3
