# Supplementary material for: OTX2 represses sister cell fate choices in the developing retina to promote photoreceptor specification
Source: eLife. 2020 Apr 29;9:e54279. doi: 10.7554/eLife.54279 (PMC7237216; doi:10.7554/eLife.54279)
Supplement: Supplementary file 3. [file elife-54279-supp3.xlsx]

## Sheet: Sheet2
	Mito			Ribo									Cell cycle
1	MTCH2		1	RPL18A	21	RPS6KA6	41	RPL32	61	RPL19		1	MCM5	21	GMNN	41	CHAF1B	61	CCNB2	81	KIF23
2	MTCH1		2	RPS16	22	RPL39	42	RPL26L1	62	RPL27		2	PCNA	22	WDR76	42	BRIP1	62	CKAP2L	82	HMMR
3	MTFR1		3	RPS19BP1	23	RPS3A	43	RPS14	63	RPL36		3	TYMS	23	SLBP	43	E2F8	63	CKAP2	83	AURKA
4	MTHFD2		4	RPL3	24	RPL34	44	RPL3L	64	RPS28		4	FEN1	24	CCNE2	44	HMGB2	64	BUB1	84	PSRC1
5	MTHFD2		5	RPL24	25	RPL7L1	45	RPS2	65	RPS15		5	MCM2	25	UBR7	45	CDK1	65	KIF11	85	ANLN
6	MTG1		6	RPL8	26	RPL9	46	RPS15A	66	RPS26		6	MCM4	26	POLD3	46	NUSAP1	66	ANP32E	86	LBR
7	MTERF3		7	RPS6KA3	27	RPS6KB2	47	RPL6	67	RPL17		7	RRM1	27	MSH2	47	UBE2C	67	TUBB4B	87	CKAP5
8	MTRF1		8	RPL31	28	RPL27A	48	RPS5	68	RPL37		8	UNG	28	ATAD2	48	BIRC5	68	GTSE1	88	CENPE
9	MTHFD1L		9	RPL21	29	RPS13	49	RPL12	69	RPS6		9	GINS2	29	RAD51	49	TPX2	69	KIF20B	89	CTCF
10	MTFMT		10	RPS3	30	RPS6KL1	50	RPL7A	70	RPS23		10	MCM6	30	RRM2	50	TOP2A	70	HJURP	90	NEK2
11	MTO1		11	RPS11	31	RPS6KA5	51	RPL35	71	RPS19		11	CDCA7	31	CDC45	51	NDC80	71	CDCA3	91	G2E3
12	MTPAP		12	RPL15	32	RPS29	52	RPL38	72	RPS7		12	DTL	32	CDC6	52	CKS2	72	JPT1	92	GAS2L3
13	MTG2		13	RPL14	33	RPS24	53	RPL23A	73	RPS4X		13	PRIM1	33	EXO1	53	NUF2	73	CDC20	93	CBX5
14	MTFR2		14	RPS20	34	RPL37A	54	RPS6KB1	74	RPL36A		14	UHRF1	34	TIPIN	54	CKS1B	74	TTK	94	CENPA
15	MTIF3		15	RPL7	35	RPL5	55	RPS21	75	RPL4		15	CENPU	35	DSCC1	55	MKI67	75	KIF2C
16	MTIF2		16	RPL30	36	RPS8	56	RPL22	76	RPL13		16	HELLS	36	BLM	56	TMPO	76	RANGAP1
17	MTRF1L		17	RPS27A	37	RPL35A	57	RPS6KA1L	77	RPL29		17	RFC2	37	CASP8AP2	57	CENPF	77	NCAPD2
			18	RPS6KC1	38	RPL22L1	58	RPL11	78	RPL10A		18	RPA2	38	USP1	58	TACC3	78	DLGAP5
			19	RPS6KA2	39	RPS17	59	RPS25	79	RPS10		19	NASP	39	CLSPN	59	FAM64A	79	CDCA2
			20	RPS12	40	RPS27L	60	RPS27	80	RPL23		20	RAD51AP1	40	POLA1	60	SMC4	80	ECT2
