# Supplementary material for: OTX2 represses sister cell fate choices in the developing retina to promote photoreceptor specification
Source: eLife. 2020 Apr 29;9:e54279. doi: 10.7554/eLife.54279 (PMC7237216; doi:10.7554/eLife.54279)
Supplement: Supplementary file 4. [file elife-54279-supp4.csv]

	p_val	avg_logFC	pct.1	pct.2	p_val_adj	cluster	gene
COL5A1	0	1.65073376243747	0.72	0.046	0	0-multi RPCs	COL5A1
AvBD5	6.02694507187502e-294	1.62134371350408	0.705	0.074	9.16035381474284e-290	0-multi RPCs	AvBD5
NR2E1	1.26313763076993e-283	1.1589739704417	0.518	0.032	1.91984288500721e-279	0-multi RPCs	NR2E1
METRN	1.26506540454991e-271	1.46446330722226	0.652	0.066	1.92277290837541e-267	0-multi RPCs	METRN
S100A13	2.24570243131263e-266	1.38271255769354	0.456	0.025	3.41324312535206e-262	0-multi RPCs	S100A13
FGFBP3	4.11306068881671e-266	2.30096628429887	0.737	0.102	6.25144094093252e-262	0-multi RPCs	FGFBP3
SLC16A1	7.70520492544516e-225	1.21778434837125	0.609	0.071	1.17111409661841e-220	0-multi RPCs	SLC16A1
SLC1A3	2.12531287699363e-214	0.74776600946034	0.28	0.007	3.23026304174261e-210	0-multi RPCs	SLC1A3
CKB	3.93370501913533e-214	2.30608302607603	0.975	0.489	5.97883825858379e-210	0-multi RPCs	CKB
COL2A1	2.0670499224644e-209	1.73198359286409	0.878	0.238	3.14170917715365e-205	0-multi RPCs	COL2A1
HEYL	3.04149473548083e-209	0.767380978032961	0.3	0.01	4.62276784845732e-205	0-multi RPCs	HEYL
ID1	1.72342740099683e-208	1.62872986991444	0.564	0.067	2.61943730677508e-204	0-multi RPCs	ID1
FABP7	1.52980230512041e-207	2.7643462817318	0.986	0.553	2.32514652355252e-203	0-multi RPCs	FABP7
CYP1B1	1.9808757327183e-188	1.88749371852961	0.453	0.045	3.01073302615855e-184	0-multi RPCs	CYP1B1
SFRP1	2.64658043189521e-185	1.02431200037255	0.45	0.043	4.02253759843753e-181	0-multi RPCs	SFRP1
CA2	4.1473117682968e-159	1.36142477828944	0.892	0.281	6.3034991566343e-155	0-multi RPCs	CA2
NRARP	1.69725872425879e-156	1.46673675047659	0.785	0.226	2.57966353500093e-152	0-multi RPCs	NRARP
STC2	1.4748853448907e-153	1.69074896959936	0.632	0.125	2.24167823569938e-149	0-multi RPCs	STC2
SOX21	5.41068850072628e-150	1.35762264787034	0.626	0.125	8.22370545225388e-146	0-multi RPCs	SOX21
SLC2A1	4.50993968171123e-148	1.36617734202377	0.841	0.296	6.8546573222329e-144	0-multi RPCs	SLC2A1
PLEKHA2	5.58079657161403e-146	0.795580874823222	0.317	0.025	8.48225270919617e-142	0-multi RPCs	PLEKHA2
S100A11	1.26819422284564e-140	0.810326780295776	0.283	0.019	1.92752839930309e-136	0-multi RPCs	S100A11
IRX6	2.35145649096463e-139	0.77352561316948	0.377	0.039	3.57397872061714e-135	0-multi RPCs	IRX6
SOX9	9.12905118260453e-136	0.965666383438083	0.479	0.073	1.38752448924406e-131	0-multi RPCs	SOX9
FZD5	1.21948402450875e-127	1.05862571310236	0.612	0.133	1.85349376885086e-123	0-multi RPCs	FZD5
TMEM161A	2.14816952631308e-127	1.14127193401037	0.742	0.212	3.26500286304325e-123	0-multi RPCs	TMEM161A
DTX4	4.8690848936599e-123	1.09532765912295	0.657	0.167	7.40052212987369e-119	0-multi RPCs	DTX4
OAF	2.58041191890424e-112	0.62900539337097	0.278	0.026	3.92196807554255e-108	0-multi RPCs	OAF
LOC107052240	3.66466921256264e-112	0.802791963045313	0.377	0.052	5.56993073617396e-108	0-multi RPCs	LOC107052240
LOC107054204	2.65845915124513e-107	1.0551145955943	0.578	0.138	4.04059206397748e-103	0-multi RPCs	LOC107054204
LFNG	7.45171822696162e-107	1.36620494462964	0.79	0.317	1.1325866533159e-102	0-multi RPCs	LFNG
SLC22A23	1.41449461465075e-104	0.850813715375019	0.456	0.084	2.14989036480768e-100	0-multi RPCs	SLC22A23
ID2	2.99257026939039e-104	1.12109498233751	0.462	0.092	4.54840755244646e-100	0-multi RPCs	ID2
TYRO3	3.99373656117863e-104	0.841611085487918	0.439	0.079	6.07008019933541e-100	0-multi RPCs	TYRO3
OPTC	2.64906508151105e-100	0.642984973600462	0.312	0.038	4.02631401738865e-96	0-multi RPCs	OPTC
PAG1	1.12911789986139e-99	0.730462869589662	0.314	0.04	1.71614629599932e-95	0-multi RPCs	PAG1
VSX2	5.04751112239905e-96	0.910266687110112	0.626	0.173	7.67171215493431e-92	0-multi RPCs	VSX2
ACBD7	9.17740165932515e-96	0.702993490615879	0.357	0.055	1.39487327820083e-91	0-multi RPCs	ACBD7
EFNB1	3.96554442962683e-94	0.94327664668905	0.68	0.216	6.02723097858981e-90	0-multi RPCs	EFNB1
LOC101748153	8.16238636995278e-93	0.648420186147106	0.329	0.046	1.24060110436912e-88	0-multi RPCs	LOC101748153
CTNNAL1	1.83427002648381e-92	1.00694654464607	0.575	0.157	2.78790701325274e-88	0-multi RPCs	CTNNAL1
HES1	6.43430745319879e-92	1.00332089818369	0.62	0.182	9.77950389811684e-88	0-multi RPCs	HES1
DBNDD2	1.02793303437346e-91	0.585503228542746	0.269	0.031	1.56235541894422e-87	0-multi RPCs	DBNDD2
IGFBP5	1.85509973847875e-90	0.729159002614937	0.309	0.042	2.81956609251386e-86	0-multi RPCs	IGFBP5
RAX	8.58329921500254e-89	0.960367733147133	0.538	0.144	1.30457564768824e-84	0-multi RPCs	RAX
FAM43A	2.02541740298893e-87	0.952511065927158	0.697	0.238	3.07843191080288e-83	0-multi RPCs	FAM43A
FLNB	4.11891810132045e-87	0.693514105508508	0.414	0.081	6.26034362219696e-83	0-multi RPCs	FLNB
LGR5	3.27202191962611e-86	0.767585294236559	0.431	0.09	4.97314611563972e-82	0-multi RPCs	LGR5
ADD3	1.16999324481795e-82	0.727678522675103	0.365	0.067	1.7782727327988e-78	0-multi RPCs	ADD3
GNG5	1.18359364747099e-81	0.893650550480115	0.85	0.441	1.79894398479116e-77	0-multi RPCs	GNG5
CHRDL1	3.10725387693028e-81	0.929060107835	0.445	0.102	4.72271516754633e-77	0-multi RPCs	CHRDL1
VIM	3.24636939520072e-81	1.00106338142236	0.669	0.227	4.93415684376558e-77	0-multi RPCs	VIM
STOX2	6.84500160102426e-79	0.999505054263441	0.841	0.494	1.04037179333968e-74	0-multi RPCs	STOX2
OSBPL2	6.57917788592865e-76	0.695830223802812	0.442	0.103	9.99969246882296e-72	0-multi RPCs	OSBPL2
CGNL1	6.2922205643181e-72	0.569423626486801	0.269	0.041	9.56354603570708e-68	0-multi RPCs	CGNL1
ST3GAL1	1.99797637601134e-70	0.773701891616835	0.397	0.091	3.03672429389964e-66	0-multi RPCs	ST3GAL1
SCRN1	9.20531862148844e-70	0.607721995207229	0.258	0.039	1.39911637728003e-65	0-multi RPCs	SCRN1
NES	4.60439933643776e-68	0.859909648495071	0.742	0.336	6.99822655145175e-64	0-multi RPCs	NES
LOC107049815	9.75906128558126e-66	0.804700812656549	0.405	0.1	1.4832797247955e-61	0-multi RPCs	LOC107049815
NKAIN4	2.4898361754747e-65	0.671037378402557	0.414	0.102	3.78430200310399e-61	0-multi RPCs	NKAIN4
AKAP12	5.84645416033369e-65	0.814372850270162	0.666	0.268	8.88602567829118e-61	0-multi RPCs	AKAP12
FOS	7.88252874108806e-65	0.954768275439964	0.439	0.124	1.19806554335797e-60	0-multi RPCs	FOS
LOC107049011	3.36863193102329e-63	0.722562283874675	0.524	0.166	5.1199836719623e-59	0-multi RPCs	LOC107049011
ITGB8	1.40953028695607e-60	0.644560243802261	0.337	0.075	2.14234508314453e-56	0-multi RPCs	ITGB8
LDHB	3.22950380274173e-60	0.765738601219864	0.547	0.193	4.90852282978715e-56	0-multi RPCs	LDHB
ADAMTS18	6.80152891458648e-60	0.58252108550353	0.309	0.064	1.033764379728e-55	0-multi RPCs	ADAMTS18
GADD45B	1.14280285935896e-58	0.617448339207714	0.314	0.067	1.73694606593968e-54	0-multi RPCs	GADD45B
NOTCH1	1.40579526447779e-57	0.711711709666643	0.853	0.438	2.13666822247979e-53	0-multi RPCs	NOTCH1
RHOB	3.31367544338548e-52	0.554684980389071	0.272	0.056	5.0364553064016e-48	0-multi RPCs	RHOB
CELSR1	7.14722267855182e-52	0.671500536654793	0.467	0.153	1.08630637491309e-47	0-multi RPCs	CELSR1
CYFIP1	2.65297740204182e-50	0.507381571793756	0.295	0.066	4.03226035336337e-46	0-multi RPCs	CYFIP1
FBN1	6.92861484340909e-50	0.512052612977471	0.28	0.061	1.05308017004975e-45	0-multi RPCs	FBN1
LOC419390	8.43001746055377e-50	0.694690039683852	0.864	0.542	1.28127835382957e-45	0-multi RPCs	LOC419390
MYL4	1.88249819519817e-48	0.563985054275508	0.297	0.071	2.8612090068817e-44	0-multi RPCs	MYL4
ADGRL2	5.67172752517323e-48	0.543627393076529	0.269	0.06	8.62045866551079e-44	0-multi RPCs	ADGRL2
CCND1	8.30906111138766e-47	0.520225496831426	0.507	0.176	1.26289419831981e-42	0-multi RPCs	CCND1
LOC107057363	1.22125047111927e-46	0.611371006597817	0.87	0.497	1.85617859105417e-42	0-multi RPCs	LOC107057363
DBNDD1	6.72277443842032e-45	0.597434411595397	0.493	0.174	1.0217944868955e-40	0-multi RPCs	DBNDD1
GAS1	9.44276578823263e-45	0.476130569009705	0.263	0.059	1.43520597215348e-40	0-multi RPCs	GAS1
ID4	2.15902154494341e-44	0.482616835114341	0.258	0.058	3.28149684615949e-40	0-multi RPCs	ID4
MIF	1.07380517130812e-43	0.714114263047011	0.938	0.814	1.63207647987121e-39	0-multi RPCs	MIF
ENO1	4.1469084285931e-43	0.515313241278912	0.98	0.937	6.30288612061865e-39	0-multi RPCs	ENO1
TOX2	7.72426716395375e-42	0.547252996900067	0.501	0.19	1.17401136624933e-37	0-multi RPCs	TOX2
EEF1D	1.87405343464642e-41	0.551992606197397	0.955	0.818	2.8483738153191e-37	0-multi RPCs	EEF1D
SMO	4.40157511274761e-41	0.411326354082339	0.261	0.062	6.68995401386509e-37	0-multi RPCs	SMO
AHCYL2	5.793474472015e-41	0.518737792004635	0.323	0.092	8.8055018500156e-37	0-multi RPCs	AHCYL2
HEY1	1.08468702084563e-40	0.495599429653766	0.397	0.128	1.64861580298328e-36	0-multi RPCs	HEY1
PTN	1.46326043869086e-39	0.689037031562062	0.286	0.077	2.22400954076623e-35	0-multi RPCs	PTN
SIX3	1.73883540418325e-39	0.57030866407031	0.853	0.597	2.64285593081812e-35	0-multi RPCs	SIX3
S100A10	1.5624645259337e-38	0.525195550659811	0.351	0.11	2.37478983296664e-34	0-multi RPCs	S100A10
RPSA	2.7056634049283e-37	0.385260164929904	0.994	0.978	4.11233780915052e-33	0-multi RPCs	RPSA
ALS2CL	3.9368777541971e-37	0.441420365532826	0.275	0.074	5.98366049860417e-33	0-multi RPCs	ALS2CL
FTH1	2.74738351083982e-36	0.451249197781362	0.992	0.915	4.17574819812545e-32	0-multi RPCs	FTH1
PALD1	1.081208011049e-35	0.591834073908	0.53	0.237	1.64332805599338e-31	0-multi RPCs	PALD1
CRYM	1.13769465552572e-35	0.516534985254274	0.385	0.136	1.72918210693355e-31	0-multi RPCs	CRYM
MDK	1.51826474269693e-35	0.810815678458834	0.436	0.18	2.30761058242506e-31	0-multi RPCs	MDK
EPHA4	1.71856835582085e-35	0.542799373384552	0.399	0.144	2.6120520440121e-31	0-multi RPCs	EPHA4
GRB10	3.55997452383637e-35	0.503848166174075	0.351	0.118	5.41080527877889e-31	0-multi RPCs	GRB10
CRABP2	1.1616998551291e-34	0.478734608966997	0.289	0.084	1.76566760981072e-30	0-multi RPCs	CRABP2
VTN	4.58674491369816e-34	0.469642209961153	0.266	0.075	6.97139359432983e-30	0-multi RPCs	VTN
LOC417113	5.93775545758844e-33	0.602753432640602	0.705	0.42	9.02479451998867e-29	0-multi RPCs	LOC417113
HRAS	1.13701809700716e-32	0.581158023836983	0.722	0.422	1.72815380564118e-28	0-multi RPCs	HRAS
CD81	2.33921965398827e-32	0.436229658612864	0.295	0.091	3.55537995209677e-28	0-multi RPCs	CD81
QKI	3.53966410889491e-32	0.496578825536369	0.513	0.231	5.37993547910938e-28	0-multi RPCs	QKI
TMSB15B	5.79504104665896e-32	0.526406086917298	0.816	0.558	8.80788288681695e-28	0-multi RPCs	TMSB15B
TNRC18	7.13931756531646e-32	0.593743956488438	0.618	0.333	1.08510487675245e-27	0-multi RPCs	TNRC18
LDHA	1.49992984937118e-31	0.626660168803774	0.898	0.715	2.27974337805925e-27	0-multi RPCs	LDHA
ARHGAP32	5.49548231070502e-31	0.48703529595507	0.357	0.13	8.35258356404056e-27	0-multi RPCs	ARHGAP32
NDRG1	8.10324366446685e-30	0.58514745051405	0.456	0.205	1.23161200456232e-25	0-multi RPCs	NDRG1
TP53I11	1.49386311262308e-29	0.490630695675298	0.524	0.244	2.27052254487582e-25	0-multi RPCs	TP53I11
ETV5	4.06253615376687e-28	0.404594781190372	0.368	0.141	6.17464870011027e-24	0-multi RPCs	ETV5
ITGB1	1.31785483284527e-27	0.439621826858414	0.278	0.093	2.00300756044152e-23	0-multi RPCs	ITGB1
JUND	6.46008890556376e-27	0.584934371134164	0.72	0.49	9.81868912756636e-23	0-multi RPCs	JUND
NAV2	7.20402864815875e-27	0.411162635059552	0.331	0.124	1.09494031423365e-22	0-multi RPCs	NAV2
CRABP1	8.11688645792808e-27	0.481834067240118	0.38	0.154	1.23368557274049e-22	0-multi RPCs	CRABP1
HES5	8.4919288340411e-27	0.395635792049939	0.688	0.355	1.29068826348591e-22	0-multi RPCs	HES5
SEMA5B	2.14194368626817e-26	0.456390011720422	0.408	0.174	3.255540208759e-22	0-multi RPCs	SEMA5B
SOX13	3.80087900844854e-26	0.366378802673393	0.263	0.085	5.77695600494094e-22	0-multi RPCs	SOX13
TMSB4X	7.28568561475165e-26	0.262687890573479	0.997	0.975	1.1073513565861e-21	0-multi RPCs	TMSB4X
TMEM165	2.21132780680934e-25	0.402404083969579	0.331	0.127	3.36099713356952e-21	0-multi RPCs	TMEM165
SAMD4A	2.32383493670776e-25	0.410001777400588	0.28	0.097	3.53199672030213e-21	0-multi RPCs	SAMD4A
EPB41L2	8.06845164800283e-25	0.34079275299686	0.538	0.27	1.22632396597995e-20	0-multi RPCs	EPB41L2
PPDPF	1.07492771991964e-24	0.486577874320492	0.292	0.109	1.63378264150586e-20	0-multi RPCs	PPDPF
TSPAN3	1.13697090229005e-24	0.559585341591011	0.578	0.329	1.72808207439065e-20	0-multi RPCs	TSPAN3
GNAI1	2.19291736088945e-24	0.361674489766942	0.263	0.09	3.33301509681587e-20	0-multi RPCs	GNAI1
MANF	6.85641956320405e-24	0.483101046521754	0.606	0.347	1.04210720941138e-19	0-multi RPCs	MANF
FERMT2	8.43951633091134e-24	0.526193408567487	0.575	0.331	1.28272208713521e-19	0-multi RPCs	FERMT2
CKMT1A	1.63587327224665e-23	0.484394806461479	0.53	0.273	2.48636378648768e-19	0-multi RPCs	CKMT1A
PLPP3	2.04759308677909e-23	0.395039045289092	0.391	0.168	3.11213673259554e-19	0-multi RPCs	PLPP3
DAAM1	3.86291358342995e-23	0.468346315218396	0.589	0.334	5.87124235545517e-19	0-multi RPCs	DAAM1
SEPT9	1.18381253345572e-22	0.395369229204964	0.32	0.129	1.79927666959934e-18	0-multi RPCs	SEPT9
PROX1	3.95014760712425e-22	0.304943902326148	0.275	0.1	6.00382934806815e-18	0-multi RPCs	PROX1
CTNNBIP1	2.17686511612957e-21	0.364168194077678	0.255	0.092	3.30861729000534e-17	0-multi RPCs	CTNNBIP1
HES6	1.44636415068677e-20	0.463141966559173	0.36	0.162	2.19832887262883e-16	0-multi RPCs	HES6
SOHO-1	2.96663789660364e-20	0.408012862815621	0.303	0.127	4.50899293904788e-16	0-multi RPCs	SOHO-1
COX8A	5.24381947753859e-20	0.316858595739558	0.977	0.91	7.9700812239109e-16	0-multi RPCs	COX8A
EPHB2	9.11858109429381e-20	0.357019792522458	0.303	0.125	1.38593314052172e-15	0-multi RPCs	EPHB2
NECAB3	1.86973660915586e-19	0.368983761189075	0.49	0.252	2.84181267225599e-15	0-multi RPCs	NECAB3
JAM3	7.56622355823234e-19	0.401834851457847	0.408	0.2	1.14999031861573e-14	0-multi RPCs	JAM3
FADS2	1.04816323432176e-18	0.419295202629776	0.394	0.196	1.59310329984565e-14	0-multi RPCs	FADS2
C1orf53	2.16561069448454e-18	0.344708414448764	0.348	0.158	3.29151169454705e-14	0-multi RPCs	C1orf53
RBP5	3.60973595313533e-18	0.364970353615076	0.513	0.28	5.48643767517039e-14	0-multi RPCs	RBP5
KIF21A	4.553611865473e-18	0.344904565318165	0.425	0.211	6.92103467433241e-14	0-multi RPCs	KIF21A
HSPA12A	1.81195107644959e-17	0.371100691435518	0.331	0.152	2.75398444109573e-13	0-multi RPCs	HSPA12A
TCF7L2	9.48849258113606e-17	0.331647394254707	0.295	0.129	1.44215598740687e-12	0-multi RPCs	TCF7L2
ARL4C	2.3383652473751e-16	0.365260497301303	0.55	0.326	3.55408133948542e-12	0-multi RPCs	ARL4C
LHFP	6.93270600667953e-16	0.351261939900193	0.32	0.149	1.05370198595522e-11	0-multi RPCs	LHFP
ATP1A1	1.00503658094637e-15	0.327343310330723	0.3	0.137	1.52755509938038e-11	0-multi RPCs	ATP1A1
MYCBP	1.50379891638694e-15	0.346279740699977	0.348	0.172	2.28562397301651e-11	0-multi RPCs	MYCBP
NR2F1	2.29938248191501e-15	0.321509189787775	0.518	0.31	3.49483143426262e-11	0-multi RPCs	NR2F1
TUBB2B	2.9762321753173e-15	0.32612342534653	0.745	0.557	4.52357528326476e-11	0-multi RPCs	TUBB2B
LBR	3.71266320135723e-15	0.433728807481067	0.816	0.697	5.64287679974285e-11	0-multi RPCs	LBR
HMGCS1	7.09835777221601e-15	0.435658560964222	0.544	0.346	1.07887939779911e-10	0-multi RPCs	HMGCS1
GPX1	8.71352008439242e-15	0.306252999748972	0.337	0.165	1.3243679176268e-10	0-multi RPCs	GPX1
SORBS2	1.41723489637364e-14	0.347460354719216	0.261	0.117	2.15405531899829e-10	0-multi RPCs	SORBS2
JUN	1.66826685200076e-14	0.336361881795708	0.309	0.148	2.53559878835595e-10	0-multi RPCs	JUN
PHLPP1	4.29449980437554e-14	0.31864262616142	0.34	0.172	6.52721025267038e-10	0-multi RPCs	PHLPP1
SMAD5	7.33472169066212e-14	0.318312625503237	0.445	0.249	1.11480434976373e-09	0-multi RPCs	SMAD5
CTNNA1	7.74978583049281e-14	0.30118188033072	0.397	0.211	1.1778899483766e-09	0-multi RPCs	CTNNA1
TUBA1C	2.67557171477095e-13	0.346011844016484	0.493	0.293	4.06660144928037e-09	0-multi RPCs	TUBA1C
CENPS	2.98246976032495e-13	0.288083985456719	0.365	0.193	4.53305578871789e-09	0-multi RPCs	CENPS
RPA3	3.68174118594182e-13	0.343265609644474	0.411	0.227	5.59587842851297e-09	0-multi RPCs	RPA3
SFXN1	3.69153727195351e-13	0.317007362530045	0.329	0.167	5.61076749964214e-09	0-multi RPCs	SFXN1
TMEM184B	7.63369927477598e-13	0.296860799487507	0.391	0.213	1.1602459527732e-08	0-multi RPCs	TMEM184B
IMPA2	1.09641713615907e-12	0.312185638530947	0.292	0.147	1.66644440524817e-08	0-multi RPCs	IMPA2
CHCHD3	1.90495262830486e-12	0.263914843841079	0.38	0.203	2.89533749976055e-08	0-multi RPCs	CHCHD3
POU3F2	3.38938443282822e-12	0.269037667664614	0.309	0.156	5.15152539945561e-08	0-multi RPCs	POU3F2
GPM6B	7.02470967331516e-12	0.293908193157442	0.728	0.552	1.06768562324717e-07	0-multi RPCs	GPM6B
TOMM6	9.98734574467759e-12	0.257836641546056	0.904	0.782	1.51797667973355e-07	0-multi RPCs	TOMM6
ATP1B3	1.86232940206458e-11	0.314247777513297	0.354	0.201	2.83055445819796e-07	0-multi RPCs	ATP1B3
TGIF2	1.93541712835463e-11	0.302012261905682	0.306	0.157	2.94164049338621e-07	0-multi RPCs	TGIF2
TNIK	2.53584797691127e-11	0.25066808781426	0.32	0.169	3.85423534010744e-07	0-multi RPCs	TNIK
GNA12	3.30798817825356e-11	0.283125001525369	0.286	0.146	5.02781123212759e-07	0-multi RPCs	GNA12
MARCKS	4.12086299279391e-11	0.256435573292937	0.915	0.91	6.26329966274746e-07	0-multi RPCs	MARCKS
MPC1	4.26846320039174e-11	0.281732864189936	0.34	0.185	6.48763721827541e-07	0-multi RPCs	MPC1
FRMD4A	5.302014505587e-11	0.264846501558441	0.317	0.171	8.05853184704168e-07	0-multi RPCs	FRMD4A
ATP2B1	6.88109399405672e-11	0.300820042077844	0.388	0.232	1.04585747615668e-06	0-multi RPCs	ATP2B1
MRPS6	7.07435721495608e-11	0.290270506958644	0.47	0.291	1.07523155310117e-06	0-multi RPCs	MRPS6
DUT	1.18061304236691e-10	0.319381780852658	0.402	0.244	1.79441376309346e-06	0-multi RPCs	DUT
CNPY3	1.75986426508724e-10	0.290899888874935	0.261	0.132	2.6748176965061e-06	0-multi RPCs	CNPY3
FAM136A	2.6070096745097e-10	0.313084560249346	0.371	0.22	3.9623940042873e-06	0-multi RPCs	FAM136A
P4HB	3.76293437981763e-10	0.321210203205165	0.419	0.259	5.71928396388481e-06	0-multi RPCs	P4HB
ARVCF	9.65167133316697e-10	0.294627773749217	0.453	0.29	1.46695752592805e-05	0-multi RPCs	ARVCF
EIF4EBP1	9.65859379239081e-10	0.297880844871714	0.751	0.609	1.46800967050548e-05	0-multi RPCs	EIF4EBP1
REEP4	1.13751387767107e-09	0.277003436725999	0.283	0.156	1.72890734267226e-05	0-multi RPCs	REEP4
EIF3E	1.25132240539307e-09	0.320818170058896	0.714	0.562	1.90188492395693e-05	0-multi RPCs	EIF3E
FAM120A	1.59702843202166e-09	0.271976303388343	0.312	0.178	2.42732351382972e-05	0-multi RPCs	FAM120A
MRPS12	2.8132659885967e-09	0.284394971426727	0.433	0.28	4.27588297606812e-05	0-multi RPCs	MRPS12
PRELID1	3.13381227730224e-09	0.266083673239229	0.7	0.538	4.76308128027167e-05	0-multi RPCs	PRELID1
PODXL	3.34259414940129e-09	0.316289875893115	0.487	0.331	5.08040884767502e-05	0-multi RPCs	PODXL
PSMG4	8.28159888644642e-09	0.283162372567314	0.462	0.308	0.000125872021475099	0-multi RPCs	PSMG4
MRPL35	1.09511900009409e-08	0.276364303511867	0.484	0.324	0.000166447136824301	0-multi RPCs	MRPL35
MRPL12	1.34250091527199e-08	0.254725909631657	0.731	0.572	0.00020404671411219	0-multi RPCs	MRPL12
HAUS2	1.45620388058301e-08	0.263099900297815	0.258	0.14	0.000221328427809812	0-multi RPCs	HAUS2
MRPS23	1.67231562335748e-08	0.286880184830062	0.394	0.255	0.000254175251594103	0-multi RPCs	MRPS23
CLIC4	2.28684241075635e-08	0.259403502210186	0.425	0.272	0.000347577178010858	0-multi RPCs	CLIC4
INSIG1	3.01090596563021e-08	0.349633607463633	0.371	0.24	0.000457627597716136	0-multi RPCs	INSIG1
MRPL54	3.62866392509493e-08	0.26183606056485	0.771	0.633	0.000551520629975178	0-multi RPCs	MRPL54
TPM3	4.09953503694607e-08	0.253111136658692	0.354	0.223	0.000623088330265434	0-multi RPCs	TPM3
MYL12A	4.33183130904924e-08	0.262710136882252	0.433	0.281	0.000658395040662393	0-multi RPCs	MYL12A
DBI	1.62594282239473e-07	0.257250016634791	0.388	0.255	0.00247127049575775	0-multi RPCs	DBI
IDI1	8.83215679081212e-07	0.258750088933766	0.351	0.227	0.0134239951063553	0-multi RPCs	IDI1
SLAINL	1.39279994260097e-06	0.250486582389304	0.263	0.159	0.0211691663275922	0-multi RPCs	SLAINL
E2F1	0	1.81004582889615	0.966	0.341	0	1-restr RPCs1	E2F1
DIO3	0	1.57514462743941	0.844	0.205	0	1-restr RPCs1	DIO3
TFAP2D1	0	1.56192790312199	0.943	0.484	0	1-restr RPCs1	TFAP2D
NEUROG21	0	1.48213511928889	0.946	0.325	0	1-restr RPCs1	NEUROG2
HES51	0	1.34851804046183	0.831	0.251	0	1-restr RPCs1	HES5
PPP1R1A1	0	1.28455810740865	0.947	0.507	0	1-restr RPCs1	PPP1R1A
NOTCH11	0	1.27184215185816	0.948	0.332	0	1-restr RPCs1	NOTCH1
HMGB2	0	1.25395711263506	0.991	0.558	0	1-restr RPCs1	HMGB2
CDCA3	0	1.24611006929744	0.951	0.314	0	1-restr RPCs1	CDCA3
TUBB4B	0	1.24463313232947	0.976	0.575	0	1-restr RPCs1	TUBB4B
VSX1	0	1.2032951012884	0.929	0.291	0	1-restr RPCs1	VSX1
ASCL1	0	1.19294526026205	0.643	0.099	0	1-restr RPCs1	ASCL1
OLIG21	0	1.19118564511462	0.94	0.292	0	1-restr RPCs1	OLIG2
UBE2C	0	1.1814748942459	0.962	0.354	0	1-restr RPCs1	UBE2C
TUBA3E	0	1.14732576108326	0.729	0.17	0	1-restr RPCs1	TUBA3E
TOP2A	0	1.09769516766932	0.959	0.361	0	1-restr RPCs1	TOP2A
NEUROD41	0	1.06119215828234	0.848	0.222	0	1-restr RPCs1	NEUROD4
NUSAP1	5.88557502411121e-303	1.03791986433246	0.855	0.243	8.94548547914663e-299	1-restr RPCs1	NUSAP1
CKAP2	2.90683709442916e-301	1.06752829902489	0.838	0.243	4.41810169982288e-297	1-restr RPCs1	CKAP2
CENPF1	7.38582081464514e-298	1.07328245118036	0.833	0.232	1.12257090561792e-293	1-restr RPCs1	CENPF
CDK1	6.84060131597246e-295	1.10074071732329	0.812	0.237	1.03970299401465e-290	1-restr RPCs1	CDK1
LOC4193901	6.23115603595488e-287	1.32319966285529	0.91	0.467	9.47073405904782e-283	1-restr RPCs1	LOC419390
TPX2	1.86012590581211e-284	1.01048792439711	0.826	0.247	2.82720536424382e-280	1-restr RPCs1	TPX2
BORL4	2.87249576581966e-283	1.04084776976629	0.934	0.362	4.36590631446929e-279	1-restr RPCs1	BORL4
KIF4A	9.98069013256079e-283	0.988255983069748	0.851	0.267	1.51696509324791e-278	1-restr RPCs1	KIF4A
HMGN4	3.535490670349e-279	0.924426899760006	0.979	0.642	5.37359226986345e-275	1-restr RPCs1	HMGN4
BHLHE221	1.62258651685523e-276	1.10962721248521	0.808	0.26	2.46616924696826e-272	1-restr RPCs1	BHLHE22
LOC1070573631	1.16720514382224e-273	1.19754341835711	0.899	0.418	1.77403509809542e-269	1-restr RPCs1	LOC107057363
MKI67	3.74638257631306e-273	0.988630475279146	0.831	0.244	5.69412687773822e-269	1-restr RPCs1	MKI67
NMRK2	1.32245742553733e-271	1.21631259039017	0.775	0.251	2.01000304107418e-267	1-restr RPCs1	NMRK2
HMGB1	1.41486501508009e-267	0.813198333686552	0.991	0.792	2.15045333642023e-263	1-restr RPCs1	HMGB1
H2A2BL1	1.43998744376551e-261	1.15038277288175	0.943	0.596	2.1886369157792e-257	1-restr RPCs1	H2A2BL
NUPL2	5.27418166093047e-254	0.985465006012099	0.57	0.11	8.01622870644822e-250	1-restr RPCs1	NUPL2
KPNA2	2.69916562866517e-247	1.11661674486357	0.703	0.188	4.1024618390082e-243	1-restr RPCs1	KPNA2
CKS1B	1.02131079829627e-243	0.923743007558006	0.935	0.426	1.5522902823305e-239	1-restr RPCs1	CKS1B
CDKN2C	7.9592229276499e-240	0.979646370407595	0.541	0.099	1.20972229277351e-235	1-restr RPCs1	CDKN2C
MXD3	8.00104425797635e-233	0.938076883435958	0.7	0.196	1.21607871676983e-228	1-restr RPCs1	MXD3
H2AFZ	1.10893738176247e-231	0.809545959548952	0.973	0.707	1.68547392654078e-227	1-restr RPCs1	H2AFZ
DAB1	3.84540477940443e-228	0.900000017689848	0.859	0.361	5.84463072421679e-224	1-restr RPCs1	DAB1
KIFC1L	4.00104535314517e-228	0.865638412009369	0.731	0.212	6.08118883224535e-224	1-restr RPCs1	KIFC1L
KIFC1	4.66029732700989e-227	0.874176904596888	0.74	0.221	7.08318590732233e-223	1-restr RPCs1	KIFC1
SPC25	1.32438488099631e-225	0.932946861721895	0.639	0.166	2.0129325806263e-221	1-restr RPCs1	SPC25
LBR1	1.5013395297597e-222	0.800996022174155	0.962	0.633	2.28188595128177e-218	1-restr RPCs1	LBR
LOC1070498851	1.7449448929187e-218	0.915369559556552	0.9	0.486	2.65214174274714e-214	1-restr RPCs1	LOC107049885
BAMBI1	5.82147059507189e-218	0.861075302087874	0.841	0.335	8.84805315744976e-214	1-restr RPCs1	BAMBI
INCENP	5.64146420026934e-216	0.863479851212579	0.689	0.196	8.57446143798937e-212	1-restr RPCs1	INCENP
BIRC5	1.95375963272644e-213	0.854106348131276	0.71	0.218	2.96951926578092e-209	1-restr RPCs1	BIRC5
KLHL4	3.7799784952165e-213	0.875799708421365	0.546	0.115	5.74518931487955e-209	1-restr RPCs1	KLHL4
DLL1	1.71702905809521e-211	0.862338759234868	0.694	0.204	2.60971246539891e-207	1-restr RPCs1	DLL1
H2AFV	4.71955372630765e-210	0.626922768219321	0.998	0.917	7.173249708615e-206	1-restr RPCs1	H2AFV
NECAB31	4.82088418340291e-209	0.915330082347884	0.624	0.168	7.32726187035408e-205	1-restr RPCs1	NECAB3
ATP8A21	6.17336757516243e-209	0.888184758375345	0.691	0.214	9.38290137748938e-205	1-restr RPCs1	ATP8A2
CENPA	2.07392639933021e-208	0.881865680283943	0.625	0.169	3.15216073434199e-204	1-restr RPCs1	CENPA
LOC112533358	2.09361446144576e-206	1.03570749248557	0.674	0.218	3.18208461995141e-202	1-restr RPCs1	LOC112533358
KNSTRN	2.5765778703338e-205	0.858943446488896	0.6	0.157	3.91614070512034e-201	1-restr RPCs1	KNSTRN
SYNJ2BP	7.2787358162281e-202	0.833444870889622	0.464	0.084	1.10629505670851e-197	1-restr RPCs1	SYNJ2BP
SMC2	1.76812700455459e-199	0.82633058629448	0.661	0.188	2.68737623422252e-195	1-restr RPCs1	SMC2
TNFSF10	8.99929557090983e-198	0.904052903313572	0.501	0.106	1.36780293382259e-193	1-restr RPCs1	TNFSF10
BUB1B	6.17050956023475e-194	0.847525435601206	0.624	0.171	9.3785574806008e-190	1-restr RPCs1	BUB1B
PRC1	6.40275910352723e-193	0.882486806785973	0.638	0.187	9.73155356145104e-189	1-restr RPCs1	PRC1
CDC20	7.65945021625541e-193	0.989421871120165	0.616	0.177	1.16415983836866e-188	1-restr RPCs1	CDC20
DCK1	1.06634880206683e-189	0.846571111353957	0.607	0.172	1.62074354426137e-185	1-restr RPCs1	DCK
CKS2	2.45836215587481e-186	0.8802299375735	0.523	0.124	3.73646464071412e-182	1-restr RPCs1	CKS2
LOC107050024	8.30084944040969e-186	0.771684170942507	0.76	0.274	1.26164610644787e-181	1-restr RPCs1	LOC107050024
SAP30	4.53702694930223e-185	0.815710528370661	0.574	0.153	6.89582726024446e-181	1-restr RPCs1	SAP30
TUBA1A1	1.01673353509624e-181	0.505624709930534	1	0.955	1.54533329999278e-177	1-restr RPCs1	TUBA1A1
ASPM	7.73599797534788e-179	0.804677601207771	0.702	0.24	1.17579433227312e-174	1-restr RPCs1	ASPM
DLGAP5	3.93277657666185e-178	0.796418228934094	0.56	0.148	5.97742711886835e-174	1-restr RPCs1	DLGAP5
FOXN4	3.49932753132536e-177	0.687437344273169	0.331	0.039	5.31862791486142e-173	1-restr RPCs1	FOXN4
NUCKS1	4.31680694940341e-176	0.753954478951659	0.923	0.591	6.56111488239823e-172	1-restr RPCs1	NUCKS1
UHRF1	2.02352593499362e-173	0.777825224403662	0.669	0.226	3.0755570685968e-169	1-restr RPCs1	UHRF1
PLK1	1.14946536742472e-171	0.824768309567913	0.592	0.178	1.74707241194883e-167	1-restr RPCs1	PLK1
RRM1	2.40723135561779e-171	0.816421095680942	0.618	0.194	3.65875093740348e-167	1-restr RPCs1	RRM1
CENPW	2.11952104732756e-170	0.752757592841288	0.586	0.168	3.22146003983316e-166	1-restr RPCs1	CENPW
SMC4	4.92200735082857e-168	0.737607612507881	0.555	0.151	7.48095897252435e-164	1-restr RPCs1	SMC4
HYLS1	1.35297632767269e-167	0.753024876523638	0.513	0.129	2.05638872042973e-163	1-restr RPCs1	HYLS1
TMPO	4.72778096579356e-165	0.754232610620488	0.75	0.315	7.18575428990963e-161	1-restr RPCs1	TMPO
NRARP1	1.89863791596398e-164	0.663627079603022	0.602	0.17	2.88573976847365e-160	1-restr RPCs1	NRARP
CBX5	1.26832829063061e-162	0.74634824884594	0.831	0.422	1.92773216892947e-158	1-restr RPCs1	CBX5
CCNB2	6.96684919752744e-161	0.795500226793	0.612	0.197	1.0588914095322e-156	1-restr RPCs1	CCNB2
PCDH17	8.39149783254153e-161	0.941947156808281	0.464	0.113	1.27542375556799e-156	1-restr RPCs1	PCDH17
MYBL11	1.76859154251668e-158	0.819970397200892	0.6	0.197	2.68808228547111e-154	1-restr RPCs1	MYBL1
RAPGEF3	3.39925933080912e-158	0.712440026107734	0.399	0.074	5.16653425689678e-154	1-restr RPCs1	RAPGEF3
KIF2C	9.9138823676353e-158	0.727700361687458	0.484	0.119	1.50681098105689e-153	1-restr RPCs1	KIF2C
NDUFA131	1.15144859754659e-157	0.635170102663574	0.965	0.754	1.75008672341106e-153	1-restr RPCs1	NDUFA13
PSIP1	3.50954256980969e-155	0.787017623774099	0.732	0.322	5.33415375185374e-151	1-restr RPCs1	PSIP1
RACGAP1	1.55341420497004e-154	0.707136914712101	0.491	0.126	2.36103425013396e-150	1-restr RPCs1	RACGAP1
PBK	1.67736402928351e-154	0.74066406548017	0.526	0.15	2.54942558810801e-150	1-restr RPCs1	PBK
INSM11	3.26195114189655e-152	0.628945913062204	0.963	0.696	4.95783954056856e-148	1-restr RPCs1	INSM1
SPAG51	9.30886069302925e-152	0.695291194621413	0.877	0.468	1.41485373673352e-147	1-restr RPCs1	SPAG5
SLC35A1	2.53704188909525e-151	0.746007336583413	0.503	0.14	3.85604996723588e-147	1-restr RPCs1	SLC35A1
CENPE	1.64164348615273e-148	0.695763980744247	0.51	0.14	2.49513393460354e-144	1-restr RPCs1	CENPE
SDK1	2.06274918860893e-147	0.622597062880552	0.348	0.06	3.13517249176671e-143	1-restr RPCs1	SDK1
KIF11	6.89282417136301e-145	0.640731847814757	0.394	0.082	1.04764034580546e-140	1-restr RPCs1	KIF11
MAD2L1	4.11682841516652e-143	0.700243088405677	0.573	0.186	6.25716750821159e-139	1-restr RPCs1	MAD2L1
SGO1	1.72980723619701e-140	0.6759441780692	0.491	0.136	2.62913401829584e-136	1-restr RPCs1	SGO1
ECT2	5.62451099735534e-139	0.687894148391146	0.478	0.131	8.54869426488039e-135	1-restr RPCs1	ECT2
TFDP21	4.77992652752814e-137	0.681730513385023	0.867	0.517	7.26501032919002e-133	1-restr RPCs1	TFDP2
NCAPH	1.65679230565233e-136	0.695277159197282	0.48	0.136	2.51815862536097e-132	1-restr RPCs1	NCAPH
HMMR	1.78390004960975e-136	0.693809388881113	0.438	0.111	2.71134968540186e-132	1-restr RPCs1	HMMR
MIS18BP1	3.07056917265961e-135	0.67715143321145	0.473	0.132	4.66695808552535e-131	1-restr RPCs1	MIS18BP1
PTTG1	1.74687865247425e-133	0.725988242019252	0.492	0.146	2.65508086389561e-129	1-restr RPCs1	PTTG1
ARHGAP11A	5.543148399766e-132	0.655850357381526	0.432	0.112	8.42503125280434e-128	1-restr RPCs1	ARHGAP11A
BCL7A	6.84919161018145e-131	0.702925183390575	0.794	0.432	1.04100863283148e-126	1-restr RPCs1	BCL7A
CCNF	4.84757373512614e-129	0.598988001133048	0.351	0.072	7.36782732001822e-125	1-restr RPCs1	CCNF
INPP4A	2.63329632252063e-127	0.672972305003261	0.781	0.397	4.0023470805991e-123	1-restr RPCs1	INPP4A
BUB1	3.97032903743002e-127	0.59943381194266	0.393	0.093	6.03450310398989e-123	1-restr RPCs1	BUB1
NDC80	5.82605220406665e-127	0.605126185089712	0.402	0.098	8.8550167449609e-123	1-restr RPCs1	NDC80
TACC3	7.13565482602203e-127	0.632884945217499	0.496	0.15	1.08454817700709e-122	1-restr RPCs1	TACC3
DLL4	2.46961194726778e-125	0.619347992675259	0.421	0.106	3.75356319865229e-121	1-restr RPCs1	DLL4
NEK2	6.0992306162551e-125	0.660910054560084	0.412	0.108	9.27022061364612e-121	1-restr RPCs1	NEK2
LOC1070518571	1.30343032353798e-123	0.469568627471304	0.988	0.887	1.98108374874538e-119	1-restr RPCs1	LOC107051857
H1FX	1.42878681527644e-123	0.613949683989909	0.914	0.644	2.17161308053866e-119	1-restr RPCs1	H1FX
CDKN1C1	3.6369320244896e-123	0.588387118418271	0.839	0.515	5.52777298402175e-119	1-restr RPCs1	CDKN1C
CCSAP	1.76601013966602e-122	0.726125978777319	0.417	0.114	2.68415881127839e-118	1-restr RPCs1	CCSAP
AURKA	3.01042703137612e-121	0.611865316418767	0.441	0.123	4.57554804498857e-117	1-restr RPCs1	AURKA
SLC4A71	5.25731980083426e-119	0.85277243909899	0.604	0.265	7.99060036528799e-115	1-restr RPCs1	SLC4A7
LOC107049257	1.11266190131421e-118	0.587101669237078	0.387	0.097	1.69113482380747e-114	1-restr RPCs1	LOC107049257
FOXN3	1.79582108518128e-118	0.670643416817303	0.575	0.222	2.72946846736702e-114	1-restr RPCs1	FOXN3
HNRNPA0	2.0844047577706e-118	0.571138508537141	0.88	0.58	3.16808679133553e-114	1-restr RPCs1	HNRNPA0
ESPL1	6.88806517918368e-118	0.619938725169753	0.401	0.106	1.04691702658413e-113	1-restr RPCs1	ESPL1
KNL1	1.40403358505537e-117	0.579300295775119	0.374	0.09	2.13399064592565e-113	1-restr RPCs1	KNL1
RASSF1	1.520090261161e-117	0.635389821727494	0.508	0.169	2.3103851879386e-113	1-restr RPCs1	RASSF1
LMNB2	5.35773101430759e-117	0.65444074435857	0.574	0.222	8.1432153686461e-113	1-restr RPCs1	LMNB2
KIF14	7.46311431560761e-117	0.569306301032053	0.34	0.075	1.1343187448292e-112	1-restr RPCs1	KIF14
CDK6	8.79584156513221e-116	0.581056554536505	0.764	0.378	1.33687995948444e-111	1-restr RPCs1	CDK6
STK38L1	2.41109567112797e-115	0.602896388309422	0.723	0.336	3.66462431054741e-111	1-restr RPCs1	STK38L
B3GLCT	3.70558069294984e-115	0.586983304678763	0.316	0.065	5.63211209521446e-111	1-restr RPCs1	B3GLCT
ATP1B31	4.57940054932232e-115	0.624572296752188	0.459	0.142	6.96023089491499e-111	1-restr RPCs1	ATP1B3
SPOCK1	1.06924161607427e-113	0.558563079563522	0.304	0.059	1.62514033227129e-109	1-restr RPCs1	SPOCK1
NNF1	1.18177658940488e-113	0.629332677860061	0.59	0.231	1.79618223823647e-109	1-restr RPCs1	NNF1
KCNT2	5.46531097565328e-113	0.597783682291442	0.442	0.132	8.30672615189541e-109	1-restr RPCs1	KCNT2
G2E3	1.03156272990616e-112	0.59766111774164	0.49	0.16	1.56787219318438e-108	1-restr RPCs1	G2E3
PTMS	6.73617702714679e-112	0.592911890460823	0.872	0.557	1.02383154635604e-107	1-restr RPCs1	PTMS
GKAP1	1.0572739360551e-111	0.65077446933066	0.426	0.129	1.60695065541015e-107	1-restr RPCs1	GKAP1
KIF20A	1.12221423543337e-111	0.608693447432671	0.419	0.121	1.70565341643518e-107	1-restr RPCs1	KIF20A
CKLF	2.16080008832408e-111	0.647267856231547	0.557	0.219	3.28420005424377e-107	1-restr RPCs1	CKLF
CENPS1	2.6682894132872e-111	0.649632461288381	0.444	0.138	4.05553307925522e-107	1-restr RPCs1	CENPS
TAF10	1.17105219348413e-110	0.635279025687498	0.78	0.446	1.77988222887654e-106	1-restr RPCs1	TAF10
SPC24	9.40140383038969e-108	0.57974443491891	0.468	0.154	1.42891936818093e-103	1-restr RPCs1	SPC24
ARHGAP19	3.17751590334384e-107	0.538426642917197	0.341	0.083	4.8295064214923e-103	1-restr RPCs1	ARHGAP19
TTK	1.61158981054587e-106	0.556267838122367	0.38	0.103	2.44945535304866e-102	1-restr RPCs1	TTK
CENPH	2.23502641882591e-106	0.558624299194046	0.431	0.133	3.3970166539735e-102	1-restr RPCs1	CENPH
AKAP121	3.76398065074297e-106	0.590447315117499	0.571	0.218	5.72087419106424e-102	1-restr RPCs1	AKAP12
TRIM81	6.60439864465345e-105	0.611859460115778	0.61	0.26	1.00380255000088e-100	1-restr RPCs1	TRIM8
LOC770126	1.70948443379845e-104	0.523967949668115	0.275	0.052	2.59824539093027e-100	1-restr RPCs1	LOC770126
USP1	2.63204855135557e-104	0.642348265535287	0.52	0.197	4.00045059320532e-100	1-restr RPCs1	USP1
KIF15	1.76644757464408e-102	0.553012567865431	0.38	0.107	2.68482366870154e-98	1-restr RPCs1	KIF15
TOMM61	1.8640787392305e-101	0.466718144063378	0.951	0.746	2.83321327575644e-97	1-restr RPCs1	TOMM6
TYMS	3.17734129051599e-101	0.600388440683636	0.426	0.136	4.82924102745525e-97	1-restr RPCs1	TYMS
DENND5B1	3.285587232251e-101	0.626413798401213	0.759	0.429	4.9937640342983e-97	1-restr RPCs1	DENND5B
NUF2	6.20258465873757e-101	0.486241110776521	0.279	0.057	9.42730842281523e-97	1-restr RPCs1	NUF2
DSCR3	1.31010297066281e-100	0.59631295353942	0.557	0.223	1.9912255051104e-96	1-restr RPCs1	DSCR3
ZC3H12C	1.59876136971981e-100	0.566467480798511	0.424	0.132	2.42995740583713e-96	1-restr RPCs1	ZC3H12C
RAN	2.84431971055988e-100	0.571737574325286	0.773	0.44	4.32308152807997e-96	1-restr RPCs1	RAN
CKAP5	3.11009703540711e-100	0.585704574289325	0.623	0.274	4.72703648411527e-96	1-restr RPCs1	CKAP5
RAD21	5.84738363409126e-100	0.573953591967843	0.727	0.37	8.8874383854553e-96	1-restr RPCs1	RAD21
FAM72A	7.25907961159549e-99	0.59527595483895	0.416	0.131	1.1033075101664e-94	1-restr RPCs1	FAM72A
NCAPD2	5.54802991085744e-98	0.540456840672518	0.405	0.125	8.43245066151223e-94	1-restr RPCs1	NCAPD2
PCOLCE2	2.11109091525902e-94	0.494845267682226	0.301	0.069	3.20864708210218e-90	1-restr RPCs1	PCOLCE2
HMGN5	9.94463775156627e-94	0.443035806469297	0.951	0.756	1.51148549186056e-89	1-restr RPCs1	HMGN5
RRM2	6.80252415140217e-91	0.586579095953058	0.453	0.161	1.03391564577162e-86	1-restr RPCs1	RRM2
RTKN2	7.12372482878678e-91	0.486587809882826	0.28	0.064	1.0827349367273e-86	1-restr RPCs1	RTKN2
NCAPD3	6.55860386432906e-90	0.516183849936946	0.303	0.076	9.96842201339375e-86	1-restr RPCs1	NCAPD3
KIF23	2.78788999494956e-89	0.500384805123056	0.304	0.077	4.23731400332384e-85	1-restr RPCs1	KIF23
CALM21	3.83236765498764e-89	0.554334374402226	0.767	0.459	5.82481559881572e-85	1-restr RPCs1	CALM2
ATAD5	3.84844280724647e-89	0.609637805511008	0.364	0.113	5.84924822273391e-85	1-restr RPCs1	ATAD5
NAP1L1	3.40153152831632e-88	0.474284882242283	0.854	0.544	5.16998776988797e-84	1-restr RPCs1	NAP1L1
SMARCA5	5.40018433827713e-87	0.535914403958795	0.698	0.365	8.2077401757474e-83	1-restr RPCs1	SMARCA5
FSTL1	7.40010085507816e-87	0.534458952395826	0.348	0.103	1.12474132896333e-82	1-restr RPCs1	FSTL1
SINHCAF	3.20238208631395e-86	0.558917091890363	0.675	0.353	4.86730053298857e-82	1-restr RPCs1	SINHCAF
CCDC15	4.88648610827777e-86	0.493094093329187	0.316	0.085	7.42697023597138e-82	1-restr RPCs1	CCDC15
NASP	3.43745236870731e-85	0.500679151189465	0.731	0.385	5.22458385519824e-81	1-restr RPCs1	NASP
NCAPG	9.30633339479664e-84	0.451135303555127	0.278	0.068	1.41446961267514e-79	1-restr RPCs1	NCAPG
MAP4K3	1.72068375140225e-83	0.658645470733747	0.36	0.117	2.61526723375627e-79	1-restr RPCs1	MAP4K3
SRSF7L	1.88737560103837e-83	0.539522229945612	0.64	0.321	2.86862217601821e-79	1-restr RPCs1	SRSF7L
SSNA1	2.63487705893698e-83	0.527544780058976	0.521	0.218	4.00474964187832e-79	1-restr RPCs1	SSNA1
SKA2	3.61349378952898e-83	0.497105416661876	0.511	0.206	5.49214921070509e-79	1-restr RPCs1	SKA2
KIF18A	7.41503883852399e-83	0.454698623222672	0.303	0.081	1.12701175306726e-78	1-restr RPCs1	KIF18A
CDCA7L	1.00927899577045e-82	0.500611890699896	0.372	0.121	1.53400314567151e-78	1-restr RPCs1	CDCA7L
MRPL51	4.8988178810211e-82	0.484642147022899	0.84	0.562	7.44571329736397e-78	1-restr RPCs1	MRPL51
NET1	1.17104918670818e-81	0.473190480311024	0.358	0.113	1.77987765887776e-77	1-restr RPCs1	NET1
KIF18B	1.29439959006008e-81	0.469003602745262	0.259	0.06	1.96735793693231e-77	1-restr RPCs1	KIF18B
RAX1	1.31025429004424e-81	0.474511646951772	0.37	0.115	1.99145549543823e-77	1-restr RPCs1	RAX
CEP55	1.64092219196097e-80	0.456310817752577	0.264	0.063	2.49403763956147e-76	1-restr RPCs1	CEP55
PDCD41	5.89109208381585e-80	0.524172536989235	0.575	0.27	8.95387085819171e-76	1-restr RPCs1	PDCD4
ANAPC10	7.0677302535836e-80	0.534316525665707	0.46	0.185	1.07422432124217e-75	1-restr RPCs1	ANAPC10
LOC112530288	9.5416578428539e-80	0.507609849808072	0.418	0.152	1.45023657553536e-75	1-restr RPCs1	LOC112530288
KIF20B	1.07166314639203e-79	0.496320981228134	0.34	0.106	1.62882081620125e-75	1-restr RPCs1	KIF20B
TMEM260	1.20185040221067e-79	0.457267125029949	0.279	0.07	1.82669242631999e-75	1-restr RPCs1	TMEM260
HELLS	1.87496377446187e-79	0.507389113577674	0.437	0.168	2.8497574408046e-75	1-restr RPCs1	HELLS
HMCES	2.03024977893421e-79	0.595502106036599	0.521	0.24	3.08577663900211e-75	1-restr RPCs1	HMCES
CNTN1	2.20250170537577e-79	0.479899142295792	0.301	0.083	3.34758234200063e-75	1-restr RPCs1	CNTN1
TRIM59	3.16425218114071e-79	0.47168732092986	0.29	0.078	4.80934689011577e-75	1-restr RPCs1	TRIM59
UBE2S1	9.34570208813912e-79	0.569051407165197	0.587	0.296	1.42045326037626e-74	1-restr RPCs1	UBE2S
SNRPE	9.99226265884225e-79	0.452247771628044	0.883	0.653	1.51872400151743e-74	1-restr RPCs1	SNRPE
COBLL1	1.17191964610856e-78	0.478557316819725	0.368	0.119	1.7812006701204e-74	1-restr RPCs1	COBLL1
BRCA1	3.89946888813793e-78	0.536791350211042	0.339	0.108	5.92680276308084e-74	1-restr RPCs1	BRCA1
YWHAH	6.35147988563349e-78	0.537637732666731	0.479	0.198	9.65361427817434e-74	1-restr RPCs1	YWHAH
BUB3	6.78461181686212e-78	0.532801397574134	0.47	0.197	1.03119315004487e-73	1-restr RPCs1	BUB3
PLK4	1.88803053571364e-77	0.469078906616155	0.331	0.102	2.86961761123117e-73	1-restr RPCs1	PLK4
GPSM2	9.39008987135662e-77	0.481363521304608	0.426	0.159	1.42719975954749e-72	1-restr RPCs1	GPSM2
FAM20B	1.74768118345946e-76	0.518232056198186	0.382	0.136	2.65630063074003e-72	1-restr RPCs1	FAM20B
TLE3	2.34748277429712e-76	0.496010191286722	0.621	0.301	3.56793906865419e-72	1-restr RPCs1	TLE3
TNFAIP8L1	6.21180377528793e-76	0.490399511530935	0.285	0.078	9.44132055806013e-72	1-restr RPCs1	TNFAIP8L1
DNA2	8.30472434690051e-76	0.504527014573145	0.264	0.068	1.26223505348541e-71	1-restr RPCs1	DNA2
WEE1	1.91224357451532e-75	0.472910267284277	0.388	0.139	2.90641900890583e-71	1-restr RPCs1	WEE1
E2F2	4.20213407972094e-75	0.488346964156685	0.26	0.067	6.38682358776786e-71	1-restr RPCs1	E2F2
LRP111	6.13887365815667e-75	0.4669769016853	0.767	0.457	9.33047407303233e-71	1-restr RPCs1	LRP11
REEP41	7.92086853224205e-75	0.472543745123067	0.346	0.113	1.20389280821547e-70	1-restr RPCs1	REEP4
TCF3	8.00365664704635e-75	0.449526509058515	0.845	0.572	1.21647577378457e-70	1-restr RPCs1	TCF3
AMMECR1	1.97388740901262e-74	0.531361585897704	0.521	0.234	3.00011147295829e-70	1-restr RPCs1	AMMECR1
HMGN3	2.22227902309817e-74	0.522420865670705	0.624	0.324	3.37764188720692e-70	1-restr RPCs1	HMGN3
ANLN	9.24770795656491e-73	0.443047461422549	0.272	0.074	1.4055591323183e-68	1-restr RPCs1	ANLN
GALNT1	1.9431689299868e-72	0.474456149584447	0.494	0.211	2.95342245668693e-68	1-restr RPCs1	GALNT1
CHCHD2	5.83849751933726e-72	0.391390971439972	0.975	0.884	8.8739323796407e-68	1-restr RPCs1	CHCHD2
CDCA2	2.37482228771317e-71	0.438331038902793	0.27	0.075	3.60949239509524e-67	1-restr RPCs1	CDCA2
EZH2	4.67778005647942e-71	0.478647887676295	0.396	0.148	7.10975790784307e-67	1-restr RPCs1	EZH2
CENPC	7.42803159039483e-71	0.449348792545446	0.271	0.076	1.12898652142411e-66	1-restr RPCs1	CENPC
CDKN3	6.09242933563777e-70	0.451287596900188	0.301	0.092	9.25988334723585e-66	1-restr RPCs1	CDKN3
BBS12	1.11163568657789e-69	0.412240817369178	0.261	0.07	1.68957508002973e-65	1-restr RPCs1	BBS12
TERF1	1.54614431969068e-69	0.444716806154864	0.313	0.101	2.34998475149787e-65	1-restr RPCs1	TERF1
TTC32	2.11475238637299e-69	0.441378269147477	0.317	0.101	3.21421215204831e-65	1-restr RPCs1	TTC32
FEZF2	1.01583215794515e-68	0.394980131160169	0.289	0.084	1.54396329686083e-64	1-restr RPCs1	FEZF2
HIST1H103	3.52006413642356e-68	0.689564412694618	0.826	0.686	5.35014548095016e-64	1-restr RPCs1	HIST1H103
ADD1	3.7407040632905e-68	0.458454371904116	0.386	0.148	5.68549610579523e-64	1-restr RPCs1	ADD1
ANKRD12	5.18360764882324e-68	0.481560882348117	0.276	0.082	7.87856526544644e-64	1-restr RPCs1	ANKRD12
DSN1	1.03858265293619e-67	0.453470008774428	0.515	0.237	1.57854177419771e-63	1-restr RPCs1	DSN1
NHS	2.46027990098333e-67	0.439265482349108	0.364	0.131	3.73937942150456e-63	1-restr RPCs1	NHS
COPS2	3.04238883456435e-67	0.475289613067693	0.42	0.171	4.62412678965436e-63	1-restr RPCs1	COPS2
LNX1	3.1010046457972e-67	0.423334818231364	0.329	0.109	4.71321696114716e-63	1-restr RPCs1	LNX1
ASF1A	6.71682091607583e-67	0.453712783421999	0.36	0.133	1.02088961103437e-62	1-restr RPCs1	ASF1A
RCBTB1	8.43938939864972e-67	0.451909174174557	0.322	0.107	1.28270279470077e-62	1-restr RPCs1	RCBTB1
CIT	1.02286926499106e-66	0.406194795768123	0.295	0.09	1.55465899585991e-62	1-restr RPCs1	CIT
GTSE1	1.82891036430498e-66	0.425708068856522	0.261	0.074	2.77976086270713e-62	1-restr RPCs1	GTSE1
PNRC2	4.26289695128397e-66	0.460581918619271	0.618	0.324	6.4791770762565e-62	1-restr RPCs1	PNRC2
KMT5A	5.94988570683988e-66	0.458326783435984	0.324	0.11	9.04323128582593e-62	1-restr RPCs1	KMT5A
PRDX1	7.05899772038731e-66	0.397461354189635	0.902	0.688	1.07289706352167e-61	1-restr RPCs1	PRDX1
FAM83D	9.00281641924024e-66	0.44640818348946	0.292	0.091	1.36833806756032e-61	1-restr RPCs1	FAM83D
MTFR2	1.46241493350284e-65	0.449097968138844	0.338	0.118	2.22272445743096e-61	1-restr RPCs1	MTFR2
HES4	2.10374790325608e-65	0.444363368494006	0.521	0.238	3.19748643815891e-61	1-restr RPCs1	HES4
GLT8D1	2.89603458873211e-65	0.408499758980463	0.259	0.073	4.40168297141394e-61	1-restr RPCs1	GLT8D1
TALDO1	4.73962848697315e-65	0.536964145289479	0.506	0.244	7.20376133735048e-61	1-restr RPCs1	TALDO1
SELENOH	9.87961984985935e-65	0.484265640572496	0.623	0.332	1.50160342098012e-60	1-restr RPCs1	SELENOH
NUCB2	2.46951328592686e-64	0.467438075578296	0.327	0.114	3.75341324328023e-60	1-restr RPCs1	NUCB2
POU3F21	4.71715880610101e-64	0.451419653241854	0.335	0.12	7.16960966939292e-60	1-restr RPCs1	POU3F2
DEK	7.48296753944026e-64	0.473741238321549	0.584	0.297	1.13733623631953e-59	1-restr RPCs1	DEK
PDZD11	1.1096585564686e-63	0.45232224562398	0.404	0.165	1.68657003997663e-59	1-restr RPCs1	PDZD11
B4GALT6	2.18965527258967e-63	0.43392524422126	0.311	0.105	3.32805704880904e-59	1-restr RPCs1	B4GALT6
E2F8	2.30721328677426e-63	0.503782516685999	0.29	0.096	3.5067334745682e-59	1-restr RPCs1	E2F8
ADH5	4.10158640395543e-63	0.442729832712984	0.573	0.292	6.23400117537186e-59	1-restr RPCs1	ADH5
H2AFX	1.28616596712049e-62	0.419559411668381	0.276	0.086	1.95484365342644e-58	1-restr RPCs1	H2AFX
CLGN	1.90921508029259e-62	0.435822492518523	0.283	0.09	2.90181600053671e-58	1-restr RPCs1	CLGN
HDGF	3.32728025306199e-62	0.399099377511314	0.905	0.722	5.05713325662892e-58	1-restr RPCs1	HDGF
LOC107049632	4.79875262299595e-62	0.440452625709627	0.326	0.117	7.29362411169154e-58	1-restr RPCs1	LOC107049632
TRPC1	6.77641522764532e-62	0.42744424444047	0.326	0.113	1.02994735044981e-57	1-restr RPCs1	TRPC1
GSTO1	2.78065656688126e-61	0.439710697513668	0.332	0.121	4.22631991600282e-57	1-restr RPCs1	GSTO1
RMI2	4.36022189742268e-61	0.444982391539818	0.358	0.138	6.62710126189273e-57	1-restr RPCs1	RMI2
CARMIL3	5.40133564663816e-61	0.460799849798935	0.465	0.213	8.20949004932534e-57	1-restr RPCs1	CARMIL3
SPATS2L	6.3394578666812e-61	0.437758740898073	0.286	0.093	9.63534201156875e-57	1-restr RPCs1	SPATS2L
H2AFY2	1.75388589797424e-60	0.445917338303216	0.437	0.193	2.66573117633104e-56	1-restr RPCs1	H2AFY2
ZC3H15	3.50776429382472e-60	0.457178569547988	0.789	0.542	5.33145095018419e-56	1-restr RPCs1	ZC3H15
RFC1	1.08988952063085e-59	0.463156215094826	0.388	0.159	1.65652308240682e-55	1-restr RPCs1	RFC1
ZIC2	1.66147950069828e-59	0.478322418504772	0.674	0.396	2.52528269311131e-55	1-restr RPCs1	ZIC2
FOXP11	1.83306400932e-59	0.447188719029506	0.648	0.369	2.78607398776547e-55	1-restr RPCs1	FOXP1
DNLZ	2.42199807824106e-59	0.429380122244029	0.649	0.363	3.68119487911858e-55	1-restr RPCs1	DNLZ
CLTA	4.44150169593672e-59	0.431739301901359	0.451	0.206	6.75063842765422e-55	1-restr RPCs1	CLTA
FBXO5	2.15265220370403e-58	0.410622653710322	0.265	0.084	3.27181608440975e-54	1-restr RPCs1	FBXO5
ACYP2	3.4791311804365e-58	0.426604132644937	0.452	0.206	5.28793148114543e-54	1-restr RPCs1	ACYP2
CD164	6.76578389198391e-58	0.444663216740397	0.479	0.227	1.02833149374263e-53	1-restr RPCs1	CD164
THYN1	1.32817131887736e-57	0.399606102846459	0.277	0.092	2.01868758756169e-53	1-restr RPCs1	THYN1
NUP160	6.53024680448065e-57	0.436197471890158	0.434	0.195	9.92532211813014e-53	1-restr RPCs1	NUP160
CHN2	6.56478616424133e-57	0.410488751080146	0.409	0.173	9.9778184910304e-53	1-restr RPCs1	CHN2
FBXW7	1.04236050581855e-56	0.397428373139991	0.574	0.297	1.58428373279361e-52	1-restr RPCs1	FBXW7
NCAPH2	2.88523471278527e-56	0.377038292963733	0.264	0.085	4.38526823996233e-52	1-restr RPCs1	NCAPH2
CSE1L	4.12794603009271e-56	0.394688103339478	0.377	0.156	6.27406517113792e-52	1-restr RPCs1	CSE1L
RALB	2.19594859932408e-55	0.408790373308279	0.359	0.144	3.33762227611267e-51	1-restr RPCs1	RALB
SUMO3	4.34472518492989e-55	0.421893767767137	0.772	0.523	6.60354780857494e-51	1-restr RPCs1	SUMO3
CKAP2L	5.44687496238859e-55	0.378246011514839	0.292	0.101	8.27870525533442e-51	1-restr RPCs1	CKAP2L
FMC1	5.64371179203995e-55	0.41937612106448	0.745	0.487	8.57787755272152e-51	1-restr RPCs1	FMC1
NCAM1	5.66532813533753e-55	0.335190853277294	0.949	0.84	8.61073223289951e-51	1-restr RPCs1	NCAM1
FBXO39	6.57238689902137e-55	0.387505094591949	0.299	0.107	9.98937084782259e-51	1-restr RPCs1	FBXO39
GPX3	2.75754841104322e-54	0.389505393147547	0.593	0.316	4.19119782994459e-50	1-restr RPCs1	GPX3
SPDL1	4.60952496910296e-54	0.374794719978085	0.393	0.165	7.00601700053959e-50	1-restr RPCs1	SPDL1
SOD1	5.20674762341715e-54	0.406194258702182	0.559	0.295	7.91373571283173e-50	1-restr RPCs1	SOD1
LPIN1	1.20498578066315e-53	0.441530938477008	0.331	0.129	1.83145788802992e-49	1-restr RPCs1	LPIN1
WHSC1	2.58835449271214e-52	0.424988118159871	0.489	0.244	3.93403999347317e-48	1-restr RPCs1	WHSC1
EEF1D1	3.08618424172478e-52	0.307311774811407	0.938	0.796	4.6906914289975e-48	1-restr RPCs1	EEF1D
PPP6R3	7.79959631796377e-52	0.41349028543477	0.486	0.245	1.18546064436731e-47	1-restr RPCs1	PPP6R3
CEP70	3.57235078336676e-51	0.404993358791756	0.295	0.11	5.42961595563913e-47	1-restr RPCs1	CEP70
PHLPP11	5.73718692511522e-51	0.41000099877447	0.338	0.14	8.71995040748263e-47	1-restr RPCs1	PHLPP1
ST13	6.10525217668065e-51	0.418396457459324	0.466	0.231	9.27937278333691e-47	1-restr RPCs1	ST13
DIAPH3	6.17261044810012e-51	0.367769448814155	0.265	0.091	9.38175062006737e-47	1-restr RPCs1	DIAPH3
PODXL1	1.00572500585999e-50	0.329611224282926	0.552	0.283	1.52860143640659e-46	1-restr RPCs1	PODXL
LOC107056600	2.07500010097028e-50	0.356798759648318	0.265	0.092	3.15379265346473e-46	1-restr RPCs1	LOC107056600
MPP6	2.28353286579861e-50	0.373480241804059	0.382	0.162	3.47074160272731e-46	1-restr RPCs1	MPP6
MED28	5.94958262267112e-50	0.409898355429025	0.547	0.302	9.04277062819784e-46	1-restr RPCs1	MED28
DUT1	1.74430309192173e-49	0.369002222173764	0.435	0.204	2.65116626941183e-45	1-restr RPCs1	DUT
AGFG11	1.75312958078131e-49	0.423560076328287	0.514	0.274	2.66458164982952e-45	1-restr RPCs1	AGFG1
FEN1	2.32876549155364e-49	0.373578892404045	0.384	0.168	3.53949067061237e-45	1-restr RPCs1	FEN1
TM9SF2	3.22506349537468e-49	0.402527993562792	0.403	0.183	4.90177400661998e-45	1-restr RPCs1	TM9SF2
TICRR	3.72705235958386e-49	0.359077469229453	0.256	0.089	5.66474688133151e-45	1-restr RPCs1	TICRR
JPT1	4.10737957819605e-49	0.373810745949035	0.8	0.563	6.24280622090018e-45	1-restr RPCs1	JPT1
SSX2IP	4.50289833231743e-49	0.345856327761487	0.287	0.106	6.84395517528927e-45	1-restr RPCs1	SSX2IP
CENPT	2.06238397502253e-48	0.341353106720356	0.268	0.095	3.13461740363675e-44	1-restr RPCs1	CENPT
INPP5K	1.36538243364214e-47	0.36774385124908	0.344	0.144	2.07524476089269e-43	1-restr RPCs1	INPP5K
EZR	1.80741662948347e-47	0.377616316317212	0.509	0.264	2.74709253515193e-43	1-restr RPCs1	EZR
HMGN1	1.83133063964644e-47	0.368466301422491	0.684	0.425	2.78343943919863e-43	1-restr RPCs1	HMGN1
ARL6IP1	2.5144443492646e-47	0.409864703604853	0.496	0.26	3.82170396644727e-43	1-restr RPCs1	ARL6IP1
ERH	3.30529445530018e-47	0.354651208370909	0.824	0.627	5.02371704261074e-43	1-restr RPCs1	ERH
PCDH10	3.50231502540276e-47	0.545082846304556	0.262	0.098	5.32316860710965e-43	1-restr RPCs1	PCDH10
NDC1	6.34104636874154e-47	0.357482458428059	0.258	0.093	9.63775637585026e-43	1-restr RPCs1	NDC1
DTYMK	6.71919980034194e-47	0.350677105489942	0.296	0.116	1.02125117765397e-42	1-restr RPCs1	DTYMK
BAZ1B	8.52077632619449e-47	0.420707398929452	0.543	0.305	1.2950727938183e-42	1-restr RPCs1	BAZ1B
OST4	1.14525944034531e-46	0.267294037217432	0.983	0.909	1.74067982338084e-42	1-restr RPCs1	OST4
CTNNAL11	1.37222848459805e-46	0.308370518776133	0.344	0.142	2.08565007374058e-42	1-restr RPCs1	CTNNAL1
KAT7	1.94812893633511e-46	0.381155428572798	0.52	0.277	2.96096117033573e-42	1-restr RPCs1	KAT7
TJP1	2.7068240707526e-46	0.348292436276877	0.335	0.14	4.11410190513688e-42	1-restr RPCs1	TJP1
DNAJC9	2.708388821697e-46	0.367613523147299	0.401	0.186	4.11648017009727e-42	1-restr RPCs1	DNAJC9
ACTR6	9.23132557564933e-46	0.384542365217709	0.541	0.298	1.40306917424294e-41	1-restr RPCs1	ACTR6
MARCH3	2.09650122677033e-45	0.344824161168955	0.26	0.096	3.18647221456822e-41	1-restr RPCs1	MARCH3
PFKFB4L1	2.14720913570565e-45	0.370897886902857	0.7	0.441	3.26354316535902e-41	1-restr RPCs1	PFKFB4L
LOC107052236	2.28842794650984e-45	0.374372176569656	0.261	0.097	3.4781816359003e-41	1-restr RPCs1	LOC107052236
HRAS1	2.65501373435231e-45	0.335697524801725	0.643	0.387	4.03535537484208e-41	1-restr RPCs1	HRAS
NDUFAF4	6.28468115714368e-45	0.364192879009802	0.276	0.106	9.55208689074268e-41	1-restr RPCs1	NDUFAF4
C1orf531	1.47095139063603e-44	0.381187842785688	0.313	0.132	2.2356990186277e-40	1-restr RPCs1	C1orf53
ROCK1	1.62123346146973e-44	0.410398613574851	0.369	0.169	2.46411273808784e-40	1-restr RPCs1	ROCK1
SNRPF	4.08669579495549e-44	0.363253886042877	0.795	0.583	6.21136893875285e-40	1-restr RPCs1	SNRPF
PAICS	4.22586155745504e-44	0.3544226784227	0.276	0.107	6.42288698117592e-40	1-restr RPCs1	PAICS
PRDX3	6.72910637440576e-44	0.389268243091028	0.517	0.293	1.02275687784593e-39	1-restr RPCs1	PRDX3
FAT1	1.2188049396073e-43	0.337233272900657	0.335	0.141	1.85246162770914e-39	1-restr RPCs1	FAT1
HES11	3.06508448001736e-43	0.338892733632398	0.368	0.169	4.65862190117839e-39	1-restr RPCs1	HES1
GNG51	1.93195797267811e-42	0.316194314904414	0.676	0.411	2.93638292267345e-38	1-restr RPCs1	GNG5
FOXP4L	4.46223250803447e-42	0.338426475687291	0.259	0.099	6.7821471889616e-38	1-restr RPCs1	FOXP4L
PXMP4	7.28448157508621e-42	0.355550644205765	0.356	0.164	1.10716835459735e-37	1-restr RPCs1	PXMP4
CMIP	5.25654449799334e-41	0.376962861728559	0.399	0.199	7.98942198250007e-37	1-restr RPCs1	CMIP
CLIC41	9.16985498426045e-41	0.359859285853173	0.445	0.237	1.39372625905775e-36	1-restr RPCs1	CLIC4
TIMM17A	1.54800192464401e-40	0.381401433847803	0.567	0.342	2.35280812526643e-36	1-restr RPCs1	TIMM17A
HMGB3	3.1988847525735e-40	0.385710232279691	0.515	0.299	4.86198493543647e-36	1-restr RPCs1	HMGB3
CCDC1731	5.05866974408906e-40	0.37623732061492	0.682	0.452	7.68867214404097e-36	1-restr RPCs1	CCDC173
IFT20	5.79091425791244e-40	0.366726262985817	0.598	0.37	8.80161058060112e-36	1-restr RPCs1	IFT20
DNAJC2	7.22652540694738e-40	0.361834533657375	0.44	0.236	1.09835959660193e-35	1-restr RPCs1	DNAJC2
FZD51	7.5790960067456e-40	0.29647385031932	0.303	0.128	1.15194680206526e-35	1-restr RPCs1	FZD5
TXNDC17	9.41776556244615e-40	0.33300807268792	0.629	0.387	1.43140618783619e-35	1-restr RPCs1	TXNDC17
MANF1	1.06865481887349e-39	0.348824840855687	0.549	0.313	1.62424845920582e-35	1-restr RPCs1	MANF
SEMA5B1	2.82529386042454e-39	0.302422715197355	0.336	0.149	4.29416413845926e-35	1-restr RPCs1	SEMA5B
DARS	2.86437735549463e-39	0.348278440989625	0.363	0.175	4.35356714261629e-35	1-restr RPCs1	DARS
CASK1	1.39072537741086e-38	0.359774185804647	0.516	0.295	2.11376350112677e-34	1-restr RPCs1	CASK
MTX2	2.16473684423545e-38	0.321514863250035	0.323	0.146	3.29018352955347e-34	1-restr RPCs1	MTX2
CETN1	2.49205562342444e-38	0.322927868059305	0.306	0.134	3.78767534204281e-34	1-restr RPCs1	CETN1
C20orf271	3.81732579819085e-38	0.329616731119328	0.444	0.233	5.80195348067027e-34	1-restr RPCs1	C20orf27
TSPAN71	7.08883836367121e-38	0.292910747696729	0.649	0.406	1.07743254289439e-33	1-restr RPCs1	TSPAN7
ARG2	8.34703335436496e-38	0.330509152263066	0.389	0.192	1.26866559952993e-33	1-restr RPCs1	ARG2
TXLNA	1.46985046412242e-36	0.31484735447687	0.326	0.151	2.23402572041967e-32	1-restr RPCs1	TXLNA
SCCPDH	1.79275996994621e-36	0.31904468561779	0.288	0.126	2.72481587832125e-32	1-restr RPCs1	SCCPDH
PCNT	2.7708219552755e-36	0.28986382446152	0.368	0.178	4.21137228982323e-32	1-restr RPCs1	PCNT
TMED10	3.58058272403578e-36	0.327016239795026	0.61	0.383	5.44212768226198e-32	1-restr RPCs1	TMED10
ALYREF	6.79549637878779e-36	0.310942183429701	0.685	0.463	1.03284749461196e-31	1-restr RPCs1	ALYREF
AKIRIN21	1.00239667274636e-35	0.316122042038838	0.728	0.508	1.52354270290719e-31	1-restr RPCs1	AKIRIN2
RCOR3	1.11433068517828e-35	0.2964274290855	0.697	0.472	1.69367120840247e-31	1-restr RPCs1	RCOR3
IPO7	1.17627936813906e-35	0.322644903836317	0.661	0.434	1.78782701163455e-31	1-restr RPCs1	IPO7
PDXP	2.51644971311101e-35	0.294706969559645	0.293	0.131	3.82475191895742e-31	1-restr RPCs1	PDXP
P4HB1	3.73084097385959e-34	0.380909052971694	0.417	0.229	5.67050519616919e-30	1-restr RPCs1	P4HB
EBNA1BP2	3.95487466970718e-34	0.300030575542324	0.3	0.138	6.01101401048794e-30	1-restr RPCs1	EBNA1BP2
NUP50	1.79385706080198e-33	0.310244544900418	0.376	0.194	2.72648334671293e-29	1-restr RPCs1	NUP50
UBR7	2.15307093870173e-33	0.325766373460061	0.533	0.321	3.27245251973275e-29	1-restr RPCs1	UBR7
USP5	2.55498196404709e-33	0.319704313643829	0.429	0.235	3.88331708715517e-29	1-restr RPCs1	USP5
R3HDM1	2.65394096718923e-33	0.316866489921758	0.297	0.139	4.03372487603092e-29	1-restr RPCs1	R3HDM1
PCMT1	8.72937457765683e-33	0.26751268824082	0.29	0.131	1.32677764205806e-28	1-restr RPCs1	PCMT1
SAPCD2	9.62029947774702e-33	0.296748677181997	0.304	0.144	1.46218931762277e-28	1-restr RPCs1	SAPCD2
LSM6	1.0334481042175e-32	0.315248179227451	0.399	0.216	1.57073777360017e-28	1-restr RPCs1	LSM6
TFDP1	1.35150345300195e-32	0.291488121401296	0.287	0.132	2.05415009821766e-28	1-restr RPCs1	TFDP1
KIAA1143	1.3550851799003e-32	0.322311520340228	0.379	0.199	2.05959396493046e-28	1-restr RPCs1	KIAA1143
UBA2	2.24773365163096e-32	0.28896298285988	0.384	0.2	3.4163303771139e-28	1-restr RPCs1	UBA2
HISTH1	2.80848372161901e-32	0.348988498427588	0.348	0.179	4.26861440848873e-28	1-restr RPCs1	HISTH1
PHF6	2.85182943947465e-32	0.306106990671529	0.361	0.186	4.33449556505752e-28	1-restr RPCs1	PHF6
UBC	4.02128244696234e-32	0.271068103079829	0.962	0.864	6.11194719113807e-28	1-restr RPCs1	UBC
CRB1	4.34866917446931e-32	0.255110057739378	0.302	0.138	6.60954227827591e-28	1-restr RPCs1	CRB1
FAM133B	5.62737064803269e-32	0.325819137862957	0.73	0.532	8.55304064794488e-28	1-restr RPCs1	FAM133B
PDDC1	6.30856797677142e-32	0.290351983155251	0.269	0.122	9.58839246789488e-28	1-restr RPCs1	PDDC1
SMAD1	8.56386019890402e-32	0.303755585882534	0.332	0.166	1.30162111163142e-27	1-restr RPCs1	SMAD1
CDV3	1.16513554150336e-31	0.307660581279571	0.629	0.418	1.77088950953096e-27	1-restr RPCs1	CDV3
LOC107052649	1.22118008307266e-31	0.286707650202947	0.499	0.29	1.85607160826213e-27	1-restr RPCs1	LOC107052649
DBF4	1.38347050635756e-31	0.289769677046118	0.283	0.131	2.10273682261286e-27	1-restr RPCs1	DBF4
PBX1	2.19001294396844e-31	0.278277504807246	0.676	0.448	3.32860067353763e-27	1-restr RPCs1	PBX1
BOLA3	2.43204332308691e-31	0.274986130431685	0.838	0.639	3.6964626467598e-27	1-restr RPCs1	BOLA3
EPHA41	2.76358848237525e-31	0.28818880682979	0.28	0.129	4.20037813436214e-27	1-restr RPCs1	EPHA4
FOXO6	3.02739064652359e-31	0.277929051203011	0.332	0.165	4.60133104365121e-27	1-restr RPCs1	FOXO6
ARF6	5.41974200216011e-31	0.322776473077235	0.468	0.272	8.23746586908315e-27	1-restr RPCs1	ARF6
QSOX2	6.32394086102198e-31	0.250917336193621	0.351	0.175	9.61175771466731e-27	1-restr RPCs1	QSOX2
ANP32E	7.35941566774366e-31	0.285641885204491	0.724	0.511	1.11855758734036e-26	1-restr RPCs1	ANP32E
POLR2L	9.99324515063838e-31	0.298500342855506	0.717	0.517	1.51887333044553e-26	1-restr RPCs1	POLR2L
CSNK1G1	2.74847639602032e-30	0.26597387425781	0.743	0.514	4.17740927431128e-26	1-restr RPCs1	CSNK1G1
FAM122B	3.11435049006892e-30	0.297325037671346	0.329	0.167	4.73350130985576e-26	1-restr RPCs1	FAM122B
HP1BP3	3.32280944520707e-30	0.285034584029658	0.562	0.357	5.05033807577022e-26	1-restr RPCs1	HP1BP3
DYL1	3.75850346267161e-30	0.274958718648318	0.812	0.622	5.71254941291458e-26	1-restr RPCs1	DYL1
RHOA	9.89953207626825e-30	0.266261900674965	0.821	0.628	1.50462988027201e-25	1-restr RPCs1	RHOA
HES61	1.23211370041974e-29	0.29341347764343	0.294	0.142	1.87268961326797e-25	1-restr RPCs1	HES6
ZFP91	2.37355443207778e-29	0.283979959141299	0.495	0.292	3.60756538131503e-25	1-restr RPCs1	ZFP91
PPIG	3.07888456809727e-29	0.289204492624531	0.684	0.466	4.67959665505104e-25	1-restr RPCs1	PPIG
MRPL121	3.12033252409384e-29	0.293307175417264	0.737	0.54	4.74259340337022e-25	1-restr RPCs1	MRPL12
PDE6D	4.07833899636715e-29	0.26889596516788	0.438	0.25	6.19866744057844e-25	1-restr RPCs1	PDE6D
VANGL2	6.58088179689136e-29	0.286251056454795	0.335	0.173	1.00022822430952e-24	1-restr RPCs1	VANGL2
SLC12A4	7.16803305885654e-29	0.28475025962929	0.299	0.148	1.08946934461561e-24	1-restr RPCs1	SLC12A4
RAB8B	7.89366637801584e-29	0.281209225658007	0.254	0.117	1.19975835279463e-24	1-restr RPCs1	RAB8B
SMTN	2.69941979459913e-28	0.341563645881128	0.355	0.196	4.10284814581122e-24	1-restr RPCs1	SMTN
SP3	3.80501742268674e-28	0.302840428708239	0.482	0.298	5.78324598074157e-24	1-restr RPCs1	SP3
LOC107053919	6.31504878926983e-28	0.282169896819134	0.404	0.23	9.59824265481122e-24	1-restr RPCs1	LOC107053919
RPA31	7.61506869772083e-28	0.283713753430025	0.369	0.204	1.15741429136659e-23	1-restr RPCs1	RPA3
LOC107049862	1.55196799862234e-27	0.268727655001745	0.351	0.189	2.3588361611061e-23	1-restr RPCs1	LOC107049862
ARVCF1	1.78672134795456e-27	0.270975757429701	0.446	0.26	2.71563777675614e-23	1-restr RPCs1	ARVCF
NDUFV2	2.50220509425258e-27	0.283175010693122	0.457	0.275	3.80310152275449e-23	1-restr RPCs1	NDUFV2
ELOF1	3.73694291230594e-27	0.31535125311409	0.583	0.388	5.67977953241379e-23	1-restr RPCs1	ELOF1
FGF12	3.8094834379979e-27	0.256537921053443	0.295	0.147	5.79003387741301e-23	1-restr RPCs1	FGF12
CHN1	3.98630825063966e-27	0.264500779187571	0.315	0.163	6.05878991014721e-23	1-restr RPCs1	CHN1
LATS1	4.36804296875815e-27	0.28338999974563	0.298	0.152	6.63898850821552e-23	1-restr RPCs1	LATS1
LPIN2	4.97158092916848e-27	0.270655005573505	0.27	0.132	7.55630585424317e-23	1-restr RPCs1	LPIN2
TOX21	5.41379117834225e-27	0.266784997849795	0.334	0.177	8.22842121196239e-23	1-restr RPCs1	TOX2
ABI2	6.88433597855582e-27	0.308602351108881	0.37	0.211	1.0463502253807e-22	1-restr RPCs1	ABI2
FAM126A	8.09734559444415e-27	0.265661230696127	0.271	0.132	1.23071555689957e-22	1-restr RPCs1	FAM126A
LOC419112	2.54370465464355e-26	0.262573932126993	0.294	0.148	3.86617670459273e-22	1-restr RPCs1	LOC419112
TP53BP21	3.4609064452103e-26	0.26249571449232	0.479	0.29	5.26023170607513e-22	1-restr RPCs1	TP53BP2
SAP130	6.37876052529584e-26	0.253881469562861	0.32	0.168	9.69507812239714e-22	1-restr RPCs1	SAP130
C6H10ORF88	6.77052839252942e-26	0.298882240233443	0.253	0.125	1.02905261038055e-21	1-restr RPCs1	C6H10ORF88
NUDT16L1	8.01784227866972e-26	0.27056559011627	0.654	0.453	1.21863184793501e-21	1-restr RPCs1	NUDT16L1
LOC101752260	1.12371627193372e-25	0.264246589541593	0.674	0.466	1.70793636171206e-21	1-restr RPCs1	LOC101752260
SOGA1	1.98455379896676e-25	0.278712012577618	0.417	0.248	3.01632331904958e-21	1-restr RPCs1	SOGA1
CYCS	1.77995463622705e-24	0.25694340614994	0.632	0.436	2.70535305160149e-20	1-restr RPCs1	CYCS
C4H4ORF46	6.0641182960325e-24	0.267490246262741	0.284	0.15	9.2168533981398e-20	1-restr RPCs1	C4H4ORF46
SMAD51	2.2939453922752e-23	0.278833776311932	0.385	0.229	3.48656760171908e-19	1-restr RPCs1	SMAD5
MARK1	4.01343423356101e-23	0.274336581730235	0.381	0.224	6.10001869158938e-19	1-restr RPCs1	MARK1
LOC107051077	8.82438038018929e-23	0.259428649873247	0.522	0.345	1.34121757398497e-18	1-restr RPCs1	LOC107051077
SIVA1	1.07067301666411e-22	0.282456431049542	0.558	0.39	1.62731591802778e-18	1-restr RPCs1	SIVA1
IMPA21	2.06169240314391e-22	0.259065605413132	0.252	0.13	3.13356628353843e-18	1-restr RPCs1	IMPA2
VDAC3	1.25073366767074e-21	0.257901922309096	0.413	0.253	1.90099010149275e-17	1-restr RPCs1	VDAC3
RFC4	3.13532961678728e-21	0.251809945271771	0.351	0.209	4.76538748455499e-17	1-restr RPCs1	RFC4
SEPT6	7.78868263784432e-21	0.282931416287904	0.373	0.228	1.18380187412596e-16	1-restr RPCs1	SEPT6
NSMCE31	3.4344145987712e-20	0.26931357221903	0.454	0.294	5.21996674867234e-16	1-restr RPCs1	NSMCE3
DDIT4	1.59551618920947e-08	0.324595643138435	0.741	0.659	0.000242502505597948	1-restr RPCs1	DDIT4
NEUROD42	3.32835786400354e-127	1.03934307016518	0.737	0.307	5.05877111749898e-123	2-restr RPCs2	NEUROD4
OLIG22	1.23378739912961e-125	1.12047130742881	0.828	0.38	1.8752334679371e-121	2-restr RPCs2	OLIG2
VSX11	2.64988737877494e-112	1.22654586018593	0.781	0.383	4.02756382700003e-108	2-restr RPCs2	VSX1
CDK61	3.65332061721651e-105	0.857975291208373	0.799	0.417	5.55268200610737e-101	2-restr RPCs2	CDK6
RPS27	1.20327302698246e-100	0.345707999382989	1	1	1.82885467371064e-96	2-restr RPCs2	RPS27
ZNF804A	2.46010122518823e-100	0.959598419990046	0.403	0.103	3.7391078521636e-96	2-restr RPCs2	ZNF804A
LOC1070573632	1.48554345221777e-98	0.845657904396774	0.854	0.478	2.25787749302579e-94	2-restr RPCs2	LOC107057363
PPP1R1A2	2.42865276095428e-93	0.762423780959567	0.877	0.566	3.69130933137441e-89	2-restr RPCs2	PPP1R1A
RPL35A	6.83653113293293e-86	0.290408757038279	1	0.999	1.03908436689448e-81	2-restr RPCs2	RPL35A
NHLH1	2.58383220753323e-85	0.839046153908886	0.336	0.079	3.92716657222975e-81	2-restr RPCs2	NHLH1
BAMBI2	2.4864839796e-84	0.844919196317903	0.735	0.407	3.77920700059404e-80	2-restr RPCs2	BAMBI
HES52	1.13819049221891e-83	0.643712386038473	0.756	0.326	1.72993572912351e-79	2-restr RPCs2	HES5
RPS21	3.74897398482159e-82	0.29222734967465	1	0.998	5.69806555953033e-78	2-restr RPCs2	RPS21
LOC4193902	3.19297493049522e-81	0.654886674316989	0.878	0.521	4.85300259685968e-77	2-restr RPCs2	LOC419390
NES2	1.51703411008266e-80	0.800019365369582	0.657	0.324	2.30574014391464e-76	2-restr RPCs2	NES
BTG11	2.78338574648525e-77	0.682711335535791	0.907	0.749	4.23046799608293e-73	2-restr RPCs2	BTG1
RPL29	9.34901666651075e-76	0.252471797219108	1	0.999	1.42095704314297e-71	2-restr RPCs2	RPL29
NEUROG22	1.5819395270957e-73	0.838339776350557	0.76	0.421	2.40438988723275e-69	2-restr RPCs2	NEUROG2
RPS14	1.24183659196388e-70	0.292427703058275	1	0.999	1.8874674361259e-66	2-restr RPCs2	RPS14
LBH	4.84031486418874e-70	0.766575751823826	0.261	0.058	7.35679456208046e-66	2-restr RPCs2	LBH
RPL11	1.7508021016722e-65	0.308305664883461	0.997	0.994	2.66104411433157e-61	2-restr RPCs2	RPL11
RPL34	3.24863979973745e-58	0.270841108449526	0.997	0.997	4.93760763162094e-54	2-restr RPCs2	RPL34
SRRM41	4.62110208367658e-58	0.615144262608759	0.815	0.599	7.02361305698003e-54	2-restr RPCs2	SRRM4
EEF1D2	1.25799765878817e-54	0.47783958315581	0.907	0.817	1.91203064159214e-50	2-restr RPCs2	EEF1D
RPL9	1.30652866631997e-53	0.264281790453098	0.998	0.995	1.98579291993973e-49	2-restr RPCs2	RPL9
RPS28	5.50617200017576e-53	0.251625187517884	1	0.998	8.36883082306713e-49	2-restr RPCs2	RPS28
NEUROG1	8.67023719053768e-52	0.633998987408998	0.266	0.078	1.31778935058982e-47	2-restr RPCs2	NEUROG1
RPS25	1.54143207783031e-49	0.286780854075741	0.995	0.995	2.34282261509428e-45	2-restr RPCs2	RPS25
GADD45A1	5.63144713268752e-49	0.581707602206474	0.747	0.539	8.55923649697176e-45	2-restr RPCs2	GADD45A
TBX2	1.82250043656834e-48	0.681745462392076	0.466	0.22	2.77001841354022e-44	2-restr RPCs2	TBX2
DLL41	2.25325055365087e-47	0.595137307503613	0.37	0.148	3.42471551649396e-43	2-restr RPCs2	DLL4
HES41	2.01447141147661e-46	0.674806144104017	0.513	0.271	3.0617950983033e-42	2-restr RPCs2	HES4
RAX2	1.72676704121676e-45	0.687022280616076	0.443	0.213	2.62451322594535e-41	2-restr RPCs2	RAX2
GPX31	5.75803749532681e-45	0.629223981587002	0.583	0.349	8.75164118914722e-41	2-restr RPCs2	GPX3
NOTCH12	3.68201763782731e-44	0.444857488027174	0.756	0.427	5.59629860773373e-40	2-restr RPCs2	NOTCH1
VSX21	2.9460018750845e-43	0.652760534984339	0.394	0.178	4.47762824994094e-39	2-restr RPCs2	VSX2
SLC4A4	2.11420447056106e-40	0.617092288058515	0.307	0.117	3.21337937480575e-36	2-restr RPCs2	SLC4A4
ANKRD6	3.72687885570335e-40	0.60317832163906	0.297	0.114	5.66448317278353e-36	2-restr RPCs2	ANKRD6
LFNG1	4.28830020036058e-40	0.455022186720273	0.573	0.319	6.51778747452805e-36	2-restr RPCs2	LFNG
SETBP1	2.57774224423349e-38	0.527721150343611	0.672	0.469	3.91791043701048e-34	2-restr RPCs2	SETBP1
C20orf272	1.03905516525423e-37	0.655836897830946	0.461	0.255	1.57925994566991e-33	2-restr RPCs2	C20orf27
RAPGEF31	3.12905576850526e-37	0.553070402293127	0.307	0.123	4.75585186255114e-33	2-restr RPCs2	RAPGEF3
RPL7	3.47826338855515e-36	0.260388338325234	0.987	0.978	5.28661252426497e-32	2-restr RPCs2	RPL7
MRAS1	1.55679463419753e-34	0.700706718639266	0.526	0.33	2.36617216451682e-30	2-restr RPCs2	MRAS
TRIM82	2.83483468756539e-33	0.524155655587251	0.518	0.312	4.30866524163063e-29	2-restr RPCs2	TRIM8
TCF7	4.88010291813051e-33	0.532387980232466	0.282	0.116	7.41726842526657e-29	2-restr RPCs2	TCF7
AMER22	2.56409384356271e-32	0.422675786216544	0.794	0.655	3.89716623283096e-28	2-restr RPCs2	AMER2
INPP4A1	3.65639583737126e-32	0.561965366864414	0.643	0.459	5.55735603322058e-28	2-restr RPCs2	INPP4A
COX8A1	3.34592420866824e-31	0.316315001396573	0.938	0.912	5.08547020475486e-27	2-restr RPCs2	COX8A
TFAP2D2	2.24244741639224e-30	0.264569968360282	0.815	0.553	3.40829582817456e-26	2-restr RPCs2	TFAP2D
AHR1B2	8.09424706001285e-30	0.503932495258656	0.469	0.264	1.23024461065135e-25	2-restr RPCs2	AHR1B
FEZF21	2.60368767287755e-28	0.494325658366726	0.261	0.111	3.95734489400659e-24	2-restr RPCs2	FEZF2
ZC3H12C1	3.44540050223152e-28	0.518456398283327	0.346	0.176	5.23666422334169e-24	2-restr RPCs2	ZC3H12C
CDKN1C2	9.39033371384413e-25	0.4247742659186	0.727	0.566	1.42723682116717e-20	2-restr RPCs2	CDKN1C
INSM21	1.38386338494341e-24	0.599588543130498	0.584	0.429	2.10333395877548e-20	2-restr RPCs2	INSM2
LOC1070518572	5.24425640525481e-24	0.322130386910895	0.958	0.902	7.97074531034679e-20	2-restr RPCs2	LOC107051857
DAB11	6.0228596583293e-24	0.390155595300968	0.636	0.447	9.15414439469471e-20	2-restr RPCs2	DAB1
TOX	7.04369415952745e-23	0.365936820840401	0.649	0.488	1.07057107530658e-18	2-restr RPCs2	TOX
MYBL12	8.11280054644865e-23	0.458776335782466	0.435	0.265	1.23306455505473e-18	2-restr RPCs2	MYBL1
TRHDE2	2.38748056104356e-21	0.471115105819394	0.386	0.228	3.62873170473011e-17	2-restr RPCs2	TRHDE
PAK31	4.69577274747613e-21	0.329610458556447	0.82	0.7	7.13710499888898e-17	2-restr RPCs2	PAK3
MARCKSL11	7.35060576309725e-21	0.333100065981505	0.808	0.695	1.11721856993315e-16	2-restr RPCs2	MARCKSL1
INSM12	3.24806813411682e-20	0.355983353906511	0.857	0.741	4.93673875704415e-16	2-restr RPCs2	INSM1
RBM38	5.31888008194762e-20	0.449023628498804	0.659	0.577	8.08416583655219e-16	2-restr RPCs2	RBM38
LPIN11	7.07038533140314e-20	0.477914481792013	0.292	0.157	1.07462786651996e-15	2-restr RPCs2	LPIN1
SRSF5	2.93234590349938e-19	0.391977296041963	0.468	0.31	4.45687253872871e-15	2-restr RPCs2	SRSF5
ATP8A22	4.83198977084459e-19	0.379458918565135	0.453	0.3	7.34414125270669e-15	2-restr RPCs2	ATP8A2
MAP1A1	6.51669356912416e-19	0.357532703321175	0.596	0.453	9.90472255571181e-15	2-restr RPCs2	MAP1A
DSCR31	2.49781222681502e-18	0.407375997209463	0.424	0.278	3.79642480353616e-14	2-restr RPCs2	DSCR3
UBL3	1.59924850327401e-17	0.429402296200312	0.451	0.318	2.43069780012617e-13	2-restr RPCs2	UBL3
ALAS1	2.8947641877433e-17	0.418635969510714	0.32	0.189	4.39975208895105e-13	2-restr RPCs2	ALAS1
MRPL57	4.10572285161214e-17	0.313589020720419	0.727	0.634	6.24028816216528e-13	2-restr RPCs2	MRPL57
MYT11	8.8801279609945e-17	0.296456400189433	0.696	0.582	1.34969064879155e-12	2-restr RPCs2	MYT1
TAGLN32	1.82334778121586e-16	0.313444629927771	0.737	0.625	2.77130629266999e-12	2-restr RPCs2	TAGLN3
STK38L2	8.44859248912903e-16	0.385082843542379	0.532	0.405	1.28410157242272e-11	2-restr RPCs2	STK38L
COL2A11	1.71244712866487e-15	0.299839695352194	0.409	0.265	2.60274839085773e-11	2-restr RPCs2	COL2A1
GNG52	5.35619695856872e-15	0.307257282074307	0.584	0.453	8.1408837573286e-11	2-restr RPCs2	GNG5
NDUFAF8	7.16638676338097e-15	0.33962031686084	0.505	0.379	1.08921912416627e-10	2-restr RPCs2	NDUFAF8
NHS1	1.86205391992228e-14	0.40531975090015	0.279	0.169	2.83013575288987e-10	2-restr RPCs2	NHS
SHISA2	4.0427790296291e-14	0.474946218512073	0.253	0.146	6.14461984713327e-10	2-restr RPCs2	SHISA2
KIAA15491	1.09375042738203e-13	0.359789870339555	0.534	0.422	1.66239127457795e-09	2-restr RPCs2	KIAA1549
PODXL2	1.16731794626892e-13	0.354436466811111	0.451	0.327	1.77420654653413e-09	2-restr RPCs2	PODXL
B3GAT21	2.39318504316964e-13	0.436970957049184	0.344	0.222	3.63740194711354e-09	2-restr RPCs2	B3GAT2
URM1	2.53922962859712e-13	0.258436913659314	0.756	0.692	3.85937511250476e-09	2-restr RPCs2	URM1
DLL11	1.09798496410909e-12	0.567194269584524	0.407	0.298	1.66882734694941e-08	2-restr RPCs2	DLL1
TP53I111	1.2930576087391e-12	0.32711547612601	0.367	0.25	1.96531825952255e-08	2-restr RPCs2	TP53I11
FBXW71	1.73938594792352e-12	0.470501361430026	0.445	0.346	2.64369270224896e-08	2-restr RPCs2	FBXW7
MSI1	2.61303758630477e-12	0.312004123252166	0.539	0.436	3.97155582742462e-08	2-restr RPCs2	MSI1
NDUFA102	3.95839154595351e-12	0.326730262835512	0.591	0.511	6.01635931069474e-08	2-restr RPCs2	NDUFA10
COL18A12	5.73830668276604e-12	0.325300136840205	0.365	0.252	8.7216523271361e-08	2-restr RPCs2	COL18A1
RAX3	1.10517814303284e-11	0.291575078314318	0.263	0.159	1.67976025959562e-07	2-restr RPCs2	RAX
ABCG11	1.14898297620327e-11	0.338249952524676	0.393	0.282	1.74633922553136e-07	2-restr RPCs2	ABCG1
PHGDH	1.44320279478401e-11	0.258767838196997	0.584	0.465	2.19352392779222e-07	2-restr RPCs2	PHGDH
QSOX21	1.66324853964043e-11	0.357012833820007	0.304	0.201	2.5279714553995e-07	2-restr RPCs2	QSOX2
DENND5B2	2.41114385449503e-11	0.337386378004914	0.591	0.489	3.66469754444699e-07	2-restr RPCs2	DENND5B
CRABP11	2.45350411423608e-11	0.296625109119493	0.258	0.158	3.72908090322743e-07	2-restr RPCs2	CRABP1
EIF3M	2.85868060159645e-11	0.27486294600804	0.67	0.614	4.34490864636644e-07	2-restr RPCs2	EIF3M
CCNG1	3.21687929383267e-11	0.292488468375447	0.508	0.404	4.88933483869628e-07	2-restr RPCs2	CCNG1
TP53BP22	5.2785298174955e-11	0.344256295812274	0.417	0.319	8.02283746961141e-07	2-restr RPCs2	TP53BP2
ERNI2	2.13255612908442e-10	0.412540603851552	0.378	0.271	3.24127206059541e-06	2-restr RPCs2	ERNI
FOXN31	2.36682106858257e-10	0.277900908142056	0.39	0.287	3.59733134213865e-06	2-restr RPCs2	FOXN3
AKAP122	2.40165471268896e-10	0.355991304039703	0.388	0.283	3.65027499781594e-06	2-restr RPCs2	AKAP12
STAT5B	2.80005329154526e-10	0.356374524792652	0.258	0.165	4.25580099781965e-06	2-restr RPCs2	STAT5B
CTNNAL12	1.19665822044292e-09	0.251833685276892	0.268	0.175	1.81880082925119e-05	2-restr RPCs2	CTNNAL1
LRFN32	2.97976793151908e-09	0.284691469207868	0.364	0.268	4.52894927911586e-05	2-restr RPCs2	LRFN3
FAT11	6.02819612395693e-09	0.310612701214594	0.258	0.174	9.16225528880214e-05	2-restr RPCs2	FAT1
NEO11	6.41084161186525e-09	0.267440429017703	0.375	0.275	9.743838165874e-05	2-restr RPCs2	NEO1
NECAB32	2.49542656728738e-08	0.461051199678052	0.336	0.259	0.000379279883962009	2-restr RPCs2	NECAB3
CELSR2	5.71434550538123e-08	0.291422782854433	0.281	0.201	0.000868523373362894	2-restr RPCs2	CELSR2
CHN21	9.76838951928922e-08	0.253444472219033	0.3	0.214	0.00148469752303677	2-restr RPCs2	CHN2
LGR4	1.0156391258749e-07	0.263539121460326	0.3	0.219	0.00154366990741726	2-restr RPCs2	LGR4
BRSK2	1.21509486396351e-07	0.27237765179487	0.274	0.191	0.00184682268373815	2-restr RPCs2	BRSK2
SLC12A2	1.29115359401791e-07	0.279346550836699	0.252	0.176	0.00196242434754782	2-restr RPCs2	SLC12A2
KLHL41	1.63690255350959e-07	0.292309012665935	0.279	0.2	0.00248792819107922	2-restr RPCs2	KLHL4
CCSER11	2.71515984425338e-07	0.267243476726149	0.513	0.436	0.00412677144728071	2-restr RPCs2	CCSER1
LOC107057416	3.54158311607935e-07	0.259524538116675	0.344	0.268	0.005382852178129	2-restr RPCs2	LOC107057416
SEPT11	3.67452880143038e-07	0.259588245870851	0.359	0.279	0.00558491632529403	2-restr RPCs2	SEPT11
VSTM2B	5.75614589516594e-07	0.260151601192828	0.269	0.195	0.00874876614606271	2-restr RPCs2	VSTM2B
ARNT2	6.84849841059627e-07	0.265347419526698	0.286	0.208	0.0104090327342653	2-restr RPCs2	ARNT2
AMMECR11	6.05154233370919e-06	0.283939907988719	0.347	0.29	0.091977391930046	2-restr RPCs2	AMMECR1
SMIM20	1.70573519677245e-05	0.272680221781628	0.383	0.331	0.259254692557444	2-restr RPCs2	SMIM20
LOC768392	2.1866729755852e-05	0.278534168196747	0.273	0.205	0.332352425559194	2-restr RPCs2	LOC768392
DIO2	0	1.71041396692209	0.611	0.067	0	3-PR precurs	DIO2
B3GAT22	8.71953930887174e-283	1.58958368937938	0.759	0.163	1.32528277955542e-278	3-PR precurs	B3GAT2
CA10	3.29969561666026e-242	1.31841357082321	0.489	0.058	5.01520736776192e-238	3-PR precurs	CA10
NFIB	4.79205814126969e-207	1.38199634341604	0.321	0.021	7.2834491689158e-203	3-PR precurs	NFIB
DSCAM	4.1666474777372e-203	1.16318749537413	0.259	0.009	6.33288750141277e-199	3-PR precurs	DSCAM
FSCN21	5.15435129470243e-166	1.17078732803305	0.627	0.168	7.83409853281822e-162	3-PR precurs	FSCN2
LOC1070503283	1.22821605393474e-165	1.15856866082583	0.663	0.197	1.86676558037541e-161	3-PR precurs	LOC107050328
UST	4.70697930752945e-163	1.11051531736708	0.494	0.103	7.15413784951402e-159	3-PR precurs	UST
AHR1B3	6.51153677338642e-156	1.2448496667395	0.663	0.236	9.89688474187002e-152	3-PR precurs	AHR1B
LOC1017490162	2.2978175183391e-148	1.20372642760187	0.704	0.273	3.4924528461236e-144	3-PR precurs	LOC101749016
CLMN2	2.6275828387749e-139	1.23396856172953	0.59	0.193	3.99366315665397e-135	3-PR precurs	CLMN
RTN4RL1	1.22056534916208e-134	1.09559556979314	0.373	0.064	1.85513727419144e-130	3-PR precurs	RTN4RL1
RBP43	4.78362716981489e-131	0.843670824036126	0.995	0.605	7.27063493540165e-127	3-PR precurs	RBP4
SNTG1	1.66036832016292e-119	0.89594283140367	0.272	0.035	2.52359380981562e-115	3-PR precurs	SNTG1
NHSL13	4.65033621221506e-110	0.972590113341613	0.703	0.344	7.06804600894567e-106	3-PR precurs	NHSL1
NACAD3	1.55602634935983e-108	0.985086944066631	0.63	0.26	2.36500444839201e-104	3-PR precurs	NACAD
OTX22	3.21828379860129e-104	0.625480250852723	0.992	0.756	4.8914695454941e-100	3-PR precurs	OTX2
CA23	3.24096740343628e-104	1.13853343784241	0.638	0.279	4.9259463564828e-100	3-PR precurs	CA2
SGK1	1.17893508655255e-87	0.855225984785374	0.293	0.06	1.79186343805123e-83	3-PR precurs	SGK1
GNG13	5.06982856158852e-87	0.895512730574765	0.383	0.102	7.70563243075839e-83	3-PR precurs	GNG13
ARNT21	1.04117511391844e-84	0.96035427309578	0.475	0.181	1.58248205564464e-80	3-PR precurs	ARNT2
DTNBP1	1.60509849841845e-84	0.873633776391491	0.361	0.1	2.4395892077462e-80	3-PR precurs	DTNBP1
PLCH21	2.36513803907664e-81	0.870885511464451	0.492	0.188	3.59477330559258e-77	3-PR precurs	PLCH2
SFMBT2	5.66184795812418e-79	0.860947393787181	0.342	0.094	8.60544271155294e-75	3-PR precurs	SFMBT2
GPC22	2.894254897165e-78	0.839072914086258	0.503	0.205	4.39897801820108e-74	3-PR precurs	GPC2
CHGA1	9.57197667790278e-78	0.78039349288184	0.465	0.17	1.45484473527444e-73	3-PR precurs	CHGA
ZNF804B	5.93584489659574e-76	0.852263567570582	0.331	0.09	9.02189065833586e-72	3-PR precurs	ZNF804B
STARD13	1.00944123285133e-75	0.814429934572455	0.321	0.084	1.53424972981073e-71	3-PR precurs	STARD13
ATP11A	2.92673580402572e-75	0.875006564386975	0.454	0.172	4.44834574853868e-71	3-PR precurs	ATP11A
INSM22	5.12096467309368e-73	0.817240571690353	0.691	0.413	7.78335420663508e-69	3-PR precurs	INSM2
CASZ13	9.35219831320714e-69	0.809626185665854	0.498	0.218	1.42144062162435e-64	3-PR precurs	CASZ1
LRFN33	6.482426665606e-68	0.877429832963995	0.514	0.246	9.85264028905456e-64	3-PR precurs	LRFN3
UNC1192	1.81211472935848e-66	0.824477294897919	0.546	0.274	2.75423317715195e-62	3-PR precurs	UNC119
NPDC12	2.20974150669484e-64	0.730333866857147	0.669	0.407	3.35858611602549e-60	3-PR precurs	NPDC1
ALDOC1	6.38975827276154e-64	0.541074210318712	0.918	0.763	9.71179359877027e-60	3-PR precurs	ALDOC
PRDM12	6.94057595542523e-64	0.749845949205188	0.631	0.346	1.05489813946508e-59	3-PR precurs	PRDM1
CLSTN13	7.09663443294545e-63	0.583720923007601	0.88	0.701	1.07861746746338e-58	3-PR precurs	CLSTN1
ADAMTS33	5.87848836577522e-61	0.747739182076438	0.559	0.278	8.93471446714176e-57	3-PR precurs	ADAMTS3
BTG22	1.58737138125235e-60	0.706291764338977	0.65	0.393	2.41264576236544e-56	3-PR precurs	BTG2
NRXN1	7.26383303395436e-59	0.850759177622647	0.402	0.161	1.10402998283072e-54	3-PR precurs	NRXN1
DIXDC11	5.69021864071789e-58	0.761518940218675	0.435	0.19	8.64856331202712e-54	3-PR precurs	DIXDC1
RGS12	1.82825386702642e-56	0.773980958845934	0.294	0.093	2.77876305249346e-52	3-PR precurs	RGS12
GRIK1	5.90134339285495e-56	0.775108871105078	0.318	0.107	8.96945182280024e-52	3-PR precurs	GRIK1
SMAP1	1.09337166459478e-55	0.871649397417095	0.494	0.265	1.66181559301761e-51	3-PR precurs	SMAP1
COL18A13	1.37749252209985e-55	0.820300255879732	0.473	0.237	2.09365088433956e-51	3-PR precurs	COL18A1
ATP5G32	3.35732452296432e-53	0.846024354049317	0.842	0.805	5.10279754245348e-49	3-PR precurs	ATP5G3
RALGPS22	2.75968031366759e-52	0.735465814635238	0.604	0.389	4.19443810874337e-48	3-PR precurs	RALGPS2
MEIS23	6.67040159437473e-52	0.758739216178327	0.585	0.341	1.01383433832901e-47	3-PR precurs	MEIS2
NRN1L2	5.45815461108314e-51	0.780632656048149	0.541	0.292	8.29584919338526e-47	3-PR precurs	NRN1L
TP53INP1	2.18910908114264e-50	0.689015039537216	0.332	0.126	3.32722689242869e-46	3-PR precurs	TP53INP1
CBFA2T33	4.41336224600564e-49	0.588879174812	0.581	0.314	6.70786927770397e-45	3-PR precurs	CBFA2T3
MAP4K43	4.97882276718113e-48	0.458989205436905	0.896	0.764	7.5673127238386e-44	3-PR precurs	MAP4K4
PAQR92	2.25839253393746e-45	0.724610518177174	0.483	0.27	3.43253081233155e-41	3-PR precurs	PAQR9
TRHDE3	1.79381207320659e-44	0.86701283118433	0.429	0.222	2.7264149700667e-40	3-PR precurs	TRHDE
CDC42BPB2	1.05943777026906e-43	0.590754685629659	0.71	0.547	1.61023946703195e-39	3-PR precurs	CDC42BPB
PCBP42	3.49910348399907e-42	0.53719054743905	0.701	0.527	5.31828738533018e-38	3-PR precurs	PCBP4
12S_ribosomal_RNA	6.57888373482167e-42	0.578862005974984	0.918	0.873	9.99924538855546e-38	3-PR precurs	12S_ribosomal_RNA
COPS92	1.21173935426396e-41	0.483537718685988	0.821	0.761	1.84172264454579e-37	3-PR precurs	COPS9
CLSTN3	1.81275423924688e-41	0.677820536552591	0.351	0.158	2.75520516823133e-37	3-PR precurs	CLSTN3
MAP22	1.07410423801916e-39	0.408457619235318	0.875	0.734	1.63253103136532e-35	3-PR precurs	MAP2
GREB1L	1.6298266656951e-39	0.638358308809476	0.342	0.152	2.47717354918999e-35	3-PR precurs	GREB1L
GTF2IRD11	2.39115443563185e-39	0.678985864378417	0.472	0.28	3.63431562671685e-35	3-PR precurs	GTF2IRD1
CDH12	1.45709009061895e-37	0.663151801333985	0.367	0.179	2.21463122873174e-33	3-PR precurs	CDH12
SERINC12	1.8619338303802e-37	0.476606067351367	0.726	0.591	2.82995322879486e-33	3-PR precurs	SERINC1
HIP12	3.902277465549e-37	0.594944828331669	0.434	0.236	5.93107151988792e-33	3-PR precurs	HIP1
KIAA11072	5.92352494273039e-37	0.638590843903934	0.435	0.24	9.00316556045591e-33	3-PR precurs	KIAA1107
ABCG4	1.39335139683971e-36	0.626930092308806	0.334	0.15	2.11775478805668e-32	3-PR precurs	ABCG4
TTC8	2.71809676362317e-36	0.589252794130636	0.331	0.151	4.13123527103085e-32	3-PR precurs	TTC8
PNRC11	4.76645987692245e-36	0.346195360374615	0.967	0.961	7.24454236693443e-32	3-PR precurs	PNRC1
NKAIN1	1.0153641694374e-35	0.582636994588707	0.263	0.102	1.5432520011279e-31	3-PR precurs	NKAIN1
PIBPPDD4L2	3.0110021657073e-35	0.461447444634823	0.606	0.398	4.57642219165853e-31	3-PR precurs	PIBPPDD4L
NFASC3	6.9491287579966e-35	0.526981196485235	0.585	0.38	1.0561980799279e-30	3-PR precurs	NFASC
SMAD73	1.75668908595233e-34	0.645312473377932	0.424	0.235	2.66999174173894e-30	3-PR precurs	SMAD7
PLPP31	2.06756527834854e-34	0.638419678581565	0.335	0.162	3.14249246656195e-30	3-PR precurs	PLPP3
FAM53B3	1.69057249506956e-33	0.520927753670971	0.593	0.393	2.56950113525622e-29	3-PR precurs	FAM53B
EML5	6.29662450174452e-33	0.569568606020246	0.329	0.153	9.5702395802015e-29	3-PR precurs	EML5
GPM6B2	9.29064298553494e-33	0.517517835764394	0.682	0.548	1.41208482737145e-28	3-PR precurs	GPM6B
NDUFA103	3.2290407193346e-32	0.526371414012818	0.628	0.506	4.90781898931667e-28	3-PR precurs	NDUFA10
SEPW12	2.08335418629283e-31	0.395371937955523	0.834	0.797	3.16649002774647e-27	3-PR precurs	SEPW1
IMPG23	2.56338828398571e-31	0.46434120430176	0.479	0.27	3.89609385282988e-27	3-PR precurs	IMPG2
TACC22	4.49602617874871e-31	0.598818053906624	0.434	0.261	6.83351018908016e-27	3-PR precurs	TACC2
TRIP12	9.94063780289632e-31	0.587989159877704	0.373	0.203	1.51087753966221e-26	3-PR precurs	TRIP12
16S_ribosomal_RNA	2.37192000268636e-30	0.392467168246553	0.948	0.901	3.60508121208299e-26	3-PR precurs	16S_ribosomal_RNA
TUBGCP5	3.32731955349808e-30	0.657673590503067	0.305	0.148	5.05719298936174e-26	3-PR precurs	TUBGCP5
BTG12	8.82611070890301e-29	0.377675023788421	0.84	0.758	1.34148056664617e-24	3-PR precurs	BTG1
LRRC3C	1.24652699814594e-28	0.550670951301018	0.37	0.205	1.89459638448201e-24	3-PR precurs	LRRC3C
NEK6	3.83951242160738e-28	0.554889423067483	0.345	0.186	5.83567492960105e-24	3-PR precurs	NEK6
SYT112	4.08203964548269e-28	0.509595413259966	0.557	0.409	6.20429205716914e-24	3-PR precurs	SYT11
TBX21	5.30067478760397e-28	0.662236460607382	0.388	0.23	8.05649560967928e-24	3-PR precurs	TBX2
MAP1A2	1.303367562917e-27	0.500437418020945	0.59	0.453	1.98098835887754e-23	3-PR precurs	MAP1A
PCBP32	2.18693451438984e-27	0.422075249617181	0.634	0.493	3.32392176842111e-23	3-PR precurs	PCBP3
ZNF5931	6.42694984141039e-27	0.30332036981041	0.915	0.897	9.76832106395966e-23	3-PR precurs	ZNF593
AK12	1.38909537098162e-26	0.556009001636705	0.437	0.291	2.11128605435496e-22	3-PR precurs	AK1
FKBP1C2	5.09179897781572e-26	0.323505218787535	0.843	0.822	7.73902526638211e-22	3-PR precurs	FKBP1C
PYGL	5.54384430415515e-26	0.549998257192231	0.301	0.149	8.42608895788541e-22	3-PR precurs	PYGL
tRNA-Ser	2.08979030302881e-25	0.264290748554504	0.984	0.975	3.17627228157349e-21	3-PR precurs	tRNA-Ser
AGAP12	3.19327884753308e-25	0.531186169942298	0.557	0.431	4.85346452036553e-21	3-PR precurs	AGAP1
NR2E3	3.01193975236106e-24	0.518863443949749	0.286	0.141	4.57784722961358e-20	3-PR precurs	NR2E3
DCTN12	3.13495972880694e-24	0.452470514854233	0.573	0.453	4.76482529181367e-20	3-PR precurs	DCTN1
CHD71	4.31854367875628e-24	0.396304601465821	0.737	0.696	6.56375453734167e-20	3-PR precurs	CHD7
CDH21	1.30666053332946e-23	0.554348935744655	0.454	0.319	1.98599334460745e-19	3-PR precurs	CDH2
GSE12	1.37930742225975e-23	0.468337551228424	0.582	0.463	2.0964093510926e-19	3-PR precurs	GSE1
RASSF8	1.5098740394173e-23	0.547191649925267	0.313	0.168	2.29485755251036e-19	3-PR precurs	RASSF8
AMER23	2.69951266411391e-23	0.371687290820511	0.745	0.661	4.10298929818673e-19	3-PR precurs	AMER2
RTN4RL2	3.90564873124313e-23	0.492665317511882	0.277	0.14	5.93619550661644e-19	3-PR precurs	RTN4RL2
GRIA2	4.53073101030541e-23	0.59871383082309	0.267	0.132	6.88625806256319e-19	3-PR precurs	GRIA2
BAZ1A1	6.79953712624781e-23	0.452055762102555	0.6	0.497	1.0334616478184e-18	3-PR precurs	BAZ1A
SAT11	1.71040523017708e-22	0.531064316309342	0.389	0.248	2.59964490934614e-18	3-PR precurs	SAT1
CPE1	2.83538480938163e-22	0.399477609451655	0.72	0.612	4.30950137177914e-18	3-PR precurs	CPE
NLK3	2.20253992832312e-21	0.565384595471941	0.367	0.234	3.34764043705831e-17	3-PR precurs	NLK
FSTL52	4.21978232478441e-21	0.352711139055014	0.552	0.395	6.41364715543983e-17	3-PR precurs	FSTL5
SYNE2	4.48609812457758e-21	0.565245051924305	0.503	0.402	6.81842053954546e-17	3-PR precurs	SYNE2
GADD45A2	5.77259141579979e-21	0.381530999453022	0.653	0.552	8.77376169287411e-17	3-PR precurs	GADD45A
CORO2B3	7.9906412492744e-21	0.458126351407249	0.392	0.251	1.21449756347722e-16	3-PR precurs	CORO2B
SREBF21	2.77634830603088e-20	0.412897486313191	0.587	0.477	4.21977179033633e-16	3-PR precurs	SREBF2
AES2	4.57068131779462e-20	0.412561553360969	0.479	0.345	6.94697853491605e-16	3-PR precurs	AES
SIX6	4.95398203254512e-20	0.387001265334365	0.881	0.909	7.52955729126533e-16	3-PR precurs	SIX6
DACH1	5.48447351805422e-20	0.496681769931484	0.323	0.192	8.33585130009061e-16	3-PR precurs	DACH1
SLC43A3	7.15283707278002e-20	0.494967371018355	0.267	0.145	1.08715970669184e-15	3-PR precurs	SLC43A3
IPMK	3.00736342911975e-19	0.585711047355548	0.269	0.151	4.5708916759191e-15	3-PR precurs	IPMK
LOC107056275	3.52030421121468e-19	0.487745490524334	0.285	0.158	5.35051037062519e-15	3-PR precurs	LOC107056275
AUTS2	2.14344652121539e-18	0.625551477212682	0.321	0.206	3.25782436759527e-14	3-PR precurs	AUTS2
PGM2L12	3.00325704893043e-18	0.455153211682971	0.372	0.246	4.56465038866935e-14	3-PR precurs	PGM2L1
RASSF2	3.40327955041248e-18	0.517607670497781	0.305	0.184	5.17264458867193e-14	3-PR precurs	RASSF2
TMEM132A2	1.12743959351801e-17	0.445076914158237	0.367	0.245	1.71359543818802e-13	3-PR precurs	TMEM132A
PCDHGC3	1.74419010173346e-17	0.501266187021511	0.323	0.207	2.65099453562469e-13	3-PR precurs	PCDHGC3
PTPRO	2.14503004186618e-17	0.468649487203902	0.272	0.157	3.26023116063241e-13	3-PR precurs	PTPRO
ARL4A3	4.51856743422295e-17	0.482940782249698	0.402	0.29	6.86777064327546e-13	3-PR precurs	ARL4A
CRYBA42	1.46346795001865e-16	0.401696225714981	0.388	0.26	2.22432493723335e-12	3-PR precurs	CRYBA4
STAT5B1	1.53602590947867e-16	0.441152051944493	0.278	0.162	2.33460577981663e-12	3-PR precurs	STAT5B
SUV39H11	1.53818944211531e-16	0.298835258784769	0.796	0.779	2.33789413307106e-12	3-PR precurs	SUV39H1
SNX61	2.48265888720531e-16	0.491491679392844	0.389	0.284	3.77339324266336e-12	3-PR precurs	SNX6
ZBTB202	1.60260800665171e-15	0.537534392797999	0.449	0.357	2.43580390930994e-11	3-PR precurs	ZBTB20
TPI11	1.84625993210213e-15	0.318951201594071	0.68	0.625	2.80613047080203e-11	3-PR precurs	TPI1
SPTBN21	2.33172419152712e-15	0.360414584802864	0.313	0.197	3.54398759870207e-11	3-PR precurs	SPTBN2
MRAS2	2.53990526931322e-15	0.39085677041152	0.453	0.34	3.86040201882916e-11	3-PR precurs	MRAS
RGCC2	1.32648876773263e-14	0.421596081455273	0.339	0.227	2.01613027807682e-10	3-PR precurs	RGCC
PIK3R33	1.46995672314297e-14	0.440823337622283	0.411	0.307	2.234187223505e-10	3-PR precurs	PIK3R3
BSG1	1.69647411890644e-14	0.365603064631799	0.59	0.527	2.5784710133259e-10	3-PR precurs	BSG
WIPI12	2.02090991429103e-14	0.467035428767342	0.364	0.263	3.07158097873093e-10	3-PR precurs	WIPI1
EIF3G1	1.14316020045085e-13	0.308849396208228	0.644	0.604	1.73748918866524e-09	3-PR precurs	EIF3G
MSMO11	1.46901528363251e-13	0.401232721653121	0.434	0.329	2.23275632959305e-09	3-PR precurs	MSMO1
RPL22L11	1.92120439778001e-13	0.291754957844217	0.685	0.652	2.92003856418583e-09	3-PR precurs	RPL22L1
GDPD5	4.46517674452605e-13	0.392459321864591	0.275	0.177	6.78662213400515e-09	3-PR precurs	GDPD5
DOT1L1	5.30042806978096e-13	0.412001868824921	0.372	0.279	8.05612062326008e-09	3-PR precurs	DOT1L
GPX41	6.25300452789719e-13	0.275804908474263	0.682	0.634	9.50394158195094e-09	3-PR precurs	GPX4
LIMD22	1.37499828955519e-12	0.406171079538698	0.334	0.235	2.08985990029493e-08	3-PR precurs	LIMD2
MYCL1	2.4120242855237e-12	0.386158834729741	0.318	0.222	3.66603571156748e-08	3-PR precurs	MYCL
CKAP41	2.42091188718827e-12	0.426719193498843	0.358	0.268	3.67954397733745e-08	3-PR precurs	CKAP4
CADM11	4.75705440851616e-12	0.325989267306184	0.636	0.586	7.23024699550372e-08	3-PR precurs	CADM1
ATP6V0E22	7.76257000846654e-12	0.337592450829981	0.585	0.547	1.17983301558683e-07	3-PR precurs	ATP6V0E2
FAM53A	8.48011445739237e-12	0.417070694299662	0.259	0.169	1.28889259637907e-07	3-PR precurs	FAM53A
YPEL51	1.12553953212576e-11	0.416146293124733	0.372	0.293	1.71070753487794e-07	3-PR precurs	YPEL5
CLVS21	1.27256667599356e-11	0.429104204063652	0.318	0.226	1.93417409084261e-07	3-PR precurs	CLVS2
SMARCA4	1.69944177077447e-11	0.368538285467771	0.392	0.311	2.58298154740012e-07	3-PR precurs	SMARCA4
SV2B2	1.71227005943558e-11	0.425291277418663	0.324	0.237	2.60247926333614e-07	3-PR precurs	SV2B
RAB39B	1.83338640117506e-11	0.452180688141728	0.271	0.186	2.78656399114597e-07	3-PR precurs	RAB39B
EVL3	3.31609598104366e-11	0.37152015922798	0.358	0.271	5.04013428158826e-07	3-PR precurs	EVL
KDM5B1	4.25402084160256e-11	0.370061774344553	0.464	0.395	6.46568627715173e-07	3-PR precurs	KDM5B
ZNF516	5.39044915114831e-11	0.402408377823855	0.43	0.361	8.19294366483032e-07	3-PR precurs	ZNF516
LOC1070562701	6.15618966778077e-11	0.381922359090698	0.478	0.405	9.35679267606e-07	3-PR precurs	LOC107056270
HMGCR1	2.01115415099536e-10	0.391840406772262	0.522	0.479	3.05675319409785e-06	3-PR precurs	HMGCR
FASN1	2.07073945297202e-10	0.370670377472294	0.491	0.45	3.14731689457217e-06	3-PR precurs	FASN
ZFAND3	2.99801944684901e-10	0.358697456299341	0.253	0.171	4.55668975726581e-06	3-PR precurs	ZFAND3
ABCG12	3.6270477138475e-10	0.384499413097889	0.366	0.286	5.51274982027682e-06	3-PR precurs	ABCG1
KLHL352	1.46242994055809e-09	0.295946391198131	0.415	0.327	2.22274726665424e-05	3-PR precurs	KLHL35
NR2F11	1.54451880287815e-09	0.512361736602183	0.384	0.316	2.3475141284945e-05	3-PR precurs	NR2F1
DNMT3A2	2.10911034436943e-09	0.288258455729643	0.541	0.491	3.2056368124071e-05	3-PR precurs	DNMT3A
PSD3	3.26457320686855e-09	0.355061982642298	0.358	0.282	4.96182481711951e-05	3-PR precurs	PSD
GABARAPL11	3.47957149963342e-09	0.403017629188045	0.318	0.249	5.28860072229283e-05	3-PR precurs	GABARAPL1
BRSK21	6.06281610567427e-09	0.336861834266376	0.269	0.191	9.21487419901432e-05	3-PR precurs	BRSK2
GLO11	7.37879966226416e-09	0.271211234419891	0.543	0.514	0.000112150376066753	3-PR precurs	GLO1
LOC101752106	1.07874946697345e-08	0.305643820584527	0.263	0.179	0.000163959131485294	3-PR precurs	LOC101752106
TRNAU1AP2	1.65779048479681e-08	0.376096054169625	0.453	0.407	0.000251967575784267	3-PR precurs	TRNAU1AP
EIF3F1	3.31398983061215e-08	0.250525230855767	0.614	0.621	0.000503693314354741	3-PR precurs	EIF3F
RSBN1L	5.00549609002729e-08	0.36667048518463	0.378	0.332	0.000760785350723249	3-PR precurs	RSBN1L
CLTB2	7.86716863525177e-08	0.325258569958521	0.403	0.345	0.00119573096087192	3-PR precurs	CLTB
SEPT31	7.88824996187033e-08	0.301780459900491	0.291	0.223	0.00119893511170467	3-PR precurs	SEPT3
UBE2H1	8.89772324191272e-08	0.356990298734053	0.372	0.321	0.00135236495553831	3-PR precurs	UBE2H
BCL21	1.05890556937267e-07	0.357555931169047	0.407	0.356	0.00160943057488951	3-PR precurs	BCL2
PLCG1	1.19355967492481e-07	0.338206860199873	0.345	0.284	0.00181409134991822	3-PR precurs	PLCG1
DBN1	2.14863719899369e-07	0.337418601538117	0.252	0.188	0.00326571367875051	3-PR precurs	DBN1
KBTBD112	2.23376698739241e-07	0.371447715063941	0.304	0.243	0.00339510244413773	3-PR precurs	KBTBD11
RGS31	6.23772536879331e-07	0.311014026042732	0.411	0.351	0.00948071878802895	3-PR precurs	RGS3
YBX32	7.90651876610125e-07	0.250601959303476	0.585	0.575	0.0120171178725973	3-PR precurs	YBX3
CHN22	9.80773443086655e-07	0.336629420341669	0.277	0.217	0.0149067755614741	3-PR precurs	CHN2
MACF12	1.11370145460395e-06	0.255292885807188	0.408	0.36	0.0169271484085254	3-PR precurs	MACF1
SYNGR11	1.38884461435445e-06	0.29184934669597	0.293	0.232	0.0211090492935733	3-PR precurs	SYNGR1
C9H3orf581	1.43518459537395e-06	0.352436395425316	0.32	0.267	0.0218133706650886	3-PR precurs	C9H3orf58
ENOPH1	1.74655524936292e-06	0.277904664935768	0.269	0.21	0.026545893235067	3-PR precurs	ENOPH1
KCNN11	2.94130722514263e-06	0.326100523633393	0.294	0.24	0.0447049285149429	3-PR precurs	KCNN1
APP2	3.18654688126969e-06	0.280863330294488	0.454	0.426	0.048432326048418	3-PR precurs	APP
SH3KBP1	3.63371636277629e-06	0.287273375675209	0.266	0.208	0.0552288549978368	3-PR precurs	SH3KBP1
MSI11	4.47188501488835e-06	0.272782819268231	0.464	0.446	0.0679681803412881	3-PR precurs	MSI1
ACTL6B1	6.13364348798149e-06	0.299162806614318	0.278	0.225	0.0932252473738306	3-PR precurs	ACTL6B
CDK2AP2	8.33209132049328e-06	0.253821568352756	0.445	0.43	0.126639455980177	3-PR precurs	CDK2AP2
SMPD31	9.8267992682038e-06	0.277719367463294	0.41	0.385	0.14935752207743	3-PR precurs	SMPD3
PHF201	1.67103875436479e-05	0.310931596613489	0.362	0.33	0.253981180275905	3-PR precurs	PHF20
DNAJB2	2.30087167182474e-05	0.302824434934157	0.269	0.224	0.349709485400642	3-PR precurs	DNAJB2
RNF442	2.56080943065703e-05	0.285235679584817	0.454	0.438	0.389217425365561	3-PR precurs	RNF44
RBM51	2.67484611447298e-05	0.284868859041792	0.402	0.379	0.406549860938748	3-PR precurs	RBM5
FOXO31	3.38859734330406e-05	0.286621454906472	0.323	0.285	0.515032910208784	3-PR precurs	FOXO3
HINT1Z1	4.62639293451121e-05	0.268249844885899	0.434	0.426	0.703165462116359	3-PR precurs	HINT1Z
RTN4	5.35852934567407e-05	0.255151137824485	0.57	0.601	0.814442875249001	3-PR precurs	RTN4
LUC7L	5.66062170935932e-05	0.276393920427565	0.34	0.308	0.860357893605524	3-PR precurs	LUC7L
MID1IP11	6.1840750805844e-05	0.285466473768425	0.339	0.303	0.939917571498022	3-PR precurs	MID1IP1
TTYH22	7.20556174160666e-05	0.268369375914706	0.44	0.421	1	3-PR precurs	TTYH2
VASH13	7.27641696507452e-05	0.27232088523836	0.318	0.282	1	3-PR precurs	VASH1
MED13L1	0.000101190608537876	0.296570337341347	0.275	0.238	1	3-PR precurs	MED13L
BAZ2A	0.000129179957297667	0.288351420862803	0.274	0.238	1	3-PR precurs	BAZ2A
SNRK	0.000131581881049561	0.269410141106194	0.252	0.205	1	3-PR precurs	SNRK
IER3IP11	0.000147551869259948	0.28196987860122	0.381	0.367	1	3-PR precurs	IER3IP1
TMEM1981	0.000174883279492152	0.273839701475592	0.424	0.412	1	3-PR precurs	TMEM198
ZNRF11	0.00018635393033754	0.296329886078786	0.313	0.285	1	3-PR precurs	ZNRF1
GOT1	0.00123984657010222	0.284066130799538	0.309	0.29	1	3-PR precurs	GOT1
SLK1	0.00124714581180515	0.358291493555688	0.258	0.231	1	3-PR precurs	SLK
ASH1L1	0.00134251375874391	0.274176565562749	0.323	0.305	1	3-PR precurs	ASH1L
MED9	0.00143369095459399	0.253631776156655	0.332	0.314	1	3-PR precurs	MED9
TEAD1	0.00306811231612971	0.275089585425472	0.282	0.258	1	3-PR precurs	TEAD1
RXRG3	0	1.61356306942888	0.966	0.373	0	4-cone PR1	RXRG
EGFLAM3	0	1.57175071604916	0.748	0.149	0	4-cone PR1	EGFLAM
FIBCD1	4.37252133732181e-272	1.65161915889097	0.447	0.041	6.64579518059541e-268	4-cone PR1	FIBCD1
RBP44	6.85635089670085e-246	1.21060978229962	0.991	0.59	1.04209677278956e-241	4-cone PR1	RBP4
THRB3	2.35832888847768e-217	1.105051269098	0.65	0.149	3.58442407759722e-213	4-cone PR1	THRB
GNGT2	4.89143060714315e-200	1.12612220802794	0.353	0.035	7.43448537979687e-196	4-cone PR1	GNGT2
OPN1LW	2.05290801759828e-197	1.36136550570196	0.276	0.015	3.12021489594763e-193	4-cone PR1	OPN1LW
TPBGL	2.66205127558493e-193	1.36308139813	0.482	0.088	4.04605173376153e-189	4-cone PR1	TPBGL
FSCN22	1.0864933523353e-192	1.085822260602	0.616	0.152	1.65136124621442e-188	4-cone PR1	FSCN2
EDIL3	8.81233657707283e-186	1.16569518071916	0.472	0.089	1.3393870363493e-181	4-cone PR1	EDIL3
SAMD7	6.94736955102403e-172	1.06097785414945	0.522	0.122	1.05593069806014e-167	4-cone PR1	SAMD7
LOC1070503284	1.04188574268576e-163	1.02805493638218	0.626	0.186	1.58356214030808e-159	4-cone PR1	LOC107050328
SALL1	4.33442987964591e-152	1.2071485500963	0.527	0.148	6.58789997407383e-148	4-cone PR1	SALL1
OTX23	5.80916990361973e-150	0.699936350886934	0.991	0.747	8.82935733651163e-146	4-cone PR1	OTX2
MAP4K44	5.17400440054167e-149	0.819374252916863	0.939	0.751	7.86396928838328e-145	4-cone PR1	MAP4K4
FAM53B4	6.84745749969193e-149	1.03937338085592	0.762	0.354	1.04074506537818e-144	4-cone PR1	FAM53B
PTPRM	7.94349893518954e-146	0.9251270746318	0.319	0.045	1.20733240315946e-141	4-cone PR1	PTPRM
RP1	1.14720514174209e-142	0.841779731749202	0.295	0.037	1.7436370949338e-138	4-cone PR1	RP1
PPL	9.65279731343195e-140	0.993460266685822	0.32	0.047	1.46712866366852e-135	4-cone PR1	PPL
KCNH6	6.29443313504895e-138	0.957182541393508	0.365	0.066	9.5669089219609e-134	4-cone PR1	KCNH6
NR2E31	2.01631600340423e-132	0.897803519232863	0.44	0.107	3.06459869357409e-128	4-cone PR1	NR2E3
MARCH1	7.99654670488633e-129	0.933656620253977	0.4	0.093	1.21539513367567e-124	4-cone PR1	MARCH1
MAP63	3.44394827897411e-128	0.88114994577061	0.715	0.322	5.23445698921274e-124	4-cone PR1	MAP6
CLSTN14	3.54095949813937e-127	0.939552113512573	0.907	0.689	5.38190434122203e-123	4-cone PR1	CLSTN1
NTM3	3.00808841658372e-126	0.938651286148734	0.605	0.227	4.5719935843656e-122	4-cone PR1	NTM
IMPG24	4.22711322403328e-126	0.941376935114533	0.629	0.235	6.42478938920819e-122	4-cone PR1	IMPG2
GNG131	7.95736140547115e-119	1.02803830600101	0.39	0.09	1.20943936001756e-114	4-cone PR1	GNG13
ANTXRL2	1.15906940997111e-116	1.04569308680335	0.657	0.318	1.76166959621509e-112	4-cone PR1	ANTXRL
PRDM13	1.22859042791241e-110	0.823593739968605	0.698	0.323	1.86733459138408e-106	4-cone PR1	PRDM1
CBFA2T34	2.21654522853087e-110	0.931870311881508	0.657	0.29	3.36892709284407e-106	4-cone PR1	CBFA2T3
NTNG2	6.77207726096853e-109	0.844989681392787	0.302	0.056	1.02928802289461e-104	4-cone PR1	NTNG2
FSTL53	4.59620047879759e-108	0.836501982742161	0.718	0.358	6.98576510772446e-104	4-cone PR1	FSTL5
ADAMTS34	3.17401245185601e-105	0.816779158987541	0.615	0.257	4.82418152557596e-101	4-cone PR1	ADAMTS3
NACAD4	1.77111228331815e-102	0.828570558921596	0.598	0.252	2.69191355941525e-98	4-cone PR1	NACAD
PIBPPDD4L3	2.43375370471044e-102	0.869083648182079	0.71	0.371	3.6990622557894e-98	4-cone PR1	PIBPPDD4L
RASSF81	1.54880136521226e-95	0.819717032288898	0.433	0.14	2.35402319498611e-91	4-cone PR1	RASSF8
RGCC3	2.20463998579616e-94	0.824161816373496	0.502	0.192	3.35083231441158e-90	4-cone PR1	RGCC
ODC12	1.07328699090405e-93	0.974409210009997	0.758	0.535	1.63128889747507e-89	4-cone PR1	ODC1
ISL2	1.16917714938349e-92	0.81258665559267	0.339	0.087	1.77703234934796e-88	4-cone PR1	ISL2
ACTB2	3.73409179393803e-89	0.519438835679699	0.989	0.96	5.6754461176064e-85	4-cone PR1	ACTB
DPYSL3	8.38694885775202e-88	0.803686420701855	0.379	0.114	1.27473235688973e-83	4-cone PR1	DPYSL3
AES3	2.98124822946188e-87	0.780083736739403	0.622	0.314	4.53119918395911e-83	4-cone PR1	AES
HSP90AB12	3.22753364839232e-85	0.825694318914102	0.735	0.474	4.90552839219148e-81	4-cone PR1	HSP90AB1
CDC42BPB3	3.6865565065014e-82	0.651342897714343	0.793	0.525	5.60319723423148e-78	4-cone PR1	CDC42BPB
TNFRSF21	3.58711131301263e-81	0.745870665490153	0.433	0.157	5.4520504846479e-77	4-cone PR1	TNFRSF21
GRIA21	6.60529398664916e-81	0.742313227146576	0.364	0.109	1.00393863303081e-76	4-cone PR1	GRIA2
PIK3R34	2.53502724749619e-80	0.828021088044031	0.563	0.275	3.85298791346946e-76	4-cone PR1	PIK3R3
H3F3B2	4.98851334193175e-80	0.421539529838987	0.996	0.993	7.58204142840206e-76	4-cone PR1	H3F3B
LOC1017521061	3.66347223126959e-79	0.806692412276348	0.415	0.147	5.56811144430665e-75	4-cone PR1	LOC101752106
KRAS3	1.16495563825783e-78	0.787300889461114	0.709	0.456	1.77061607458808e-74	4-cone PR1	KRAS
IGSF9B	2.52772430646227e-75	0.793203898544216	0.378	0.131	3.84188817339201e-71	4-cone PR1	IGSF9B
ACKR3	6.5137865056107e-75	0.722681556975593	0.374	0.123	9.9003041098777e-71	4-cone PR1	ACKR3
SMAD74	4.18087014434325e-74	0.739096722328336	0.494	0.214	6.35450453238731e-70	4-cone PR1	SMAD7
ABCG41	7.01885839593381e-72	0.715527059971244	0.384	0.133	1.06679628759798e-67	4-cone PR1	ABCG4
PCBP22	1.18875562712502e-70	0.682822168467802	0.79	0.583	1.80678967766732e-66	4-cone PR1	PCBP2
NPDC13	7.81116584279302e-70	0.637679765216987	0.674	0.396	1.18721909644611e-65	4-cone PR1	NPDC1
RAPGEF5	1.9962629692628e-69	0.685483318404344	0.343	0.111	3.03412008698252e-65	4-cone PR1	RAPGEF5
MEIS24	2.12144790966433e-69	0.62747982502	0.62	0.325	3.22438867789882e-65	4-cone PR1	MEIS2
C14orf132	2.63413184609353e-69	0.745851242504919	0.388	0.142	4.00361699287756e-65	4-cone PR1	C14orf132
LOC1070562751	1.04180367629372e-68	0.714725135514822	0.378	0.136	1.58343740759882e-64	4-cone PR1	LOC107056275
GSTAL2	2.97149341251147e-68	0.767182158659585	0.338	0.113	4.51637283767619e-64	4-cone PR1	GSTAL2
SAMD11	1.40204494829462e-66	0.718557998747328	0.32	0.103	2.13096811691299e-62	4-cone PR1	SAMD11
EPB41L4A	1.87999046179644e-66	0.581014281041458	0.253	0.063	2.8573975028844e-62	4-cone PR1	EPB41L4A
EPHA3	4.82287682676094e-66	0.734784206242028	0.396	0.154	7.33029048899396e-62	4-cone PR1	EPHA3
STXBP13	5.24475078199777e-66	0.744722707117027	0.483	0.23	7.97149671355842e-62	4-cone PR1	STXBP1
PYGL1	3.43064998887371e-65	0.713741975802972	0.365	0.132	5.21424491808915e-61	4-cone PR1	PYGL
SPTBN22	7.61946202334911e-65	0.710219484574497	0.417	0.173	1.15808203292883e-60	4-cone PR1	SPTBN2
NFASC4	1.28924507286776e-64	0.607881942049506	0.65	0.36	1.95952358625172e-60	4-cone PR1	NFASC
PSD4	5.58098589395483e-64	0.653745266384947	0.512	0.25	8.48254046022195e-60	4-cone PR1	PSD
PPP2R2B	5.13399784946248e-63	0.618350557567604	0.261	0.072	7.80316333139802e-59	4-cone PR1	PPP2R2B
PCBP43	1.39715128125075e-62	0.58924592991047	0.739	0.513	2.12353023237302e-58	4-cone PR1	PCBP4
MAP23	5.24769481568869e-62	0.528339650414374	0.858	0.732	7.97597135036524e-58	4-cone PR1	MAP2
RTN4RL11	7.16510528566769e-62	0.521633649385125	0.27	0.072	1.08902435236863e-57	4-cone PR1	RTN4RL1
NHSL14	9.76970006506135e-61	0.572920250088684	0.621	0.346	1.48489671288867e-56	4-cone PR1	NHSL1
RAI2	3.02352258821551e-60	0.635012773535069	0.279	0.084	4.59545198182876e-56	4-cone PR1	RAI2
BCL2L11	6.14617656055192e-60	0.638033601505651	0.445	0.202	9.34157375438287e-56	4-cone PR1	BCL2L1
CASZ14	5.51466653132178e-58	0.606287156743588	0.469	0.213	8.38174166095597e-54	4-cone PR1	CASZ1
ATP11A1	3.26261258161522e-55	0.600139285224238	0.404	0.17	4.95884486279698e-51	4-cone PR1	ATP11A
FRMD1	4.76133631633489e-55	0.660718563684113	0.355	0.144	7.2367550671974e-51	4-cone PR1	FRMD1
SDK2	6.4357185915166e-55	0.673236566686212	0.378	0.161	9.78164868724608e-51	4-cone PR1	SDK2
MTSS11	1.41757342574034e-54	0.637721886208861	0.418	0.185	2.15456984978275e-50	4-cone PR1	MTSS1
BTG23	3.14572201873216e-54	0.697304219379205	0.609	0.391	4.78118289627101e-50	4-cone PR1	BTG2
SPEG	3.23490089201421e-53	0.621478337657715	0.286	0.099	4.91672586577239e-49	4-cone PR1	SPEG
NRN1L3	1.1565192693792e-51	0.778182724127441	0.518	0.286	1.75779363752945e-47	4-cone PR1	NRN1L
DAB2IP3	9.20621399230841e-51	0.625637812499548	0.557	0.331	1.39925246469095e-46	4-cone PR1	DAB2IP
SELENOI	1.11967684860599e-50	0.695021921903055	0.405	0.191	1.70179684219624e-46	4-cone PR1	SELENOI
NANOS1	1.25991445966195e-49	0.736931458967067	0.355	0.148	1.91494398724019e-45	4-cone PR1	NANOS1
CD631	2.98815666605041e-48	0.643070200766569	0.414	0.204	4.54169931673002e-44	4-cone PR1	CD63
GPC23	1.09532681142233e-47	0.561856902212244	0.434	0.206	1.6647872206808e-43	4-cone PR1	GPC2
HSPB9	2.8608493456511e-47	1.83009517781849	0.389	0.182	4.3482049204551e-43	4-cone PR1	HSPB9
SYNPR	1.0785024716041e-46	0.703186876712182	0.33	0.141	1.63921590659107e-42	4-cone PR1	SYNPR
SREBF22	4.39739392301101e-46	0.521077571588737	0.681	0.456	6.68359902358444e-42	4-cone PR1	SREBF2
CORO2B4	2.35415623108394e-44	0.597745336785773	0.45	0.235	3.57808205562449e-40	4-cone PR1	CORO2B
SEPW13	5.39568725070078e-44	0.386246935452458	0.866	0.79	8.20090505234012e-40	4-cone PR1	SEPW1
PTPN13	4.88160937801014e-43	0.587641127965538	0.289	0.114	7.41955809363761e-39	4-cone PR1	PTPN13
GRIK11	7.5123473834072e-43	0.507472190342506	0.282	0.105	1.14180167880406e-38	4-cone PR1	GRIK1
NEUROD1	2.11369169502302e-42	0.564864787542992	0.338	0.147	3.21260000726549e-38	4-cone PR1	NEUROD1
PGM2L13	1.2680875105768e-41	0.584285121471912	0.429	0.23	1.92736620732568e-37	4-cone PR1	PGM2L1
CHGA2	1.04947176442378e-40	0.399627735826313	0.379	0.174	1.59509213474771e-36	4-cone PR1	CHGA
SREBF1	5.62255018892027e-40	0.531055040808422	0.334	0.153	8.54571403213991e-36	4-cone PR1	SREBF1
EML51	9.6801451009273e-40	0.558662457976301	0.33	0.147	1.47128525388994e-35	4-cone PR1	EML5
TUB	2.12798457269569e-39	0.568110120872641	0.343	0.161	3.23432375204018e-35	4-cone PR1	TUB
LIMD23	2.35501072966058e-39	0.542291780019706	0.414	0.217	3.57938080801111e-35	4-cone PR1	LIMD2
OAT1	3.57996842948911e-39	0.615187056757009	0.383	0.197	5.4411940159805e-35	4-cone PR1	OAT
MXRA7	4.66260573044108e-39	0.567231622909182	0.361	0.179	7.0866944496974e-35	4-cone PR1	MXRA7
KLHL353	1.37474113758935e-37	0.560564938682557	0.506	0.307	2.08946905502205e-33	4-cone PR1	KLHL35
APLP23	1.28148050824499e-36	0.532610463721828	0.398	0.213	1.94772222448156e-32	4-cone PR1	APLP2
SCG33	2.0996406027198e-36	0.571836349700614	0.454	0.256	3.19124375207382e-32	4-cone PR1	SCG3
PLEKHG5	3.36970542598667e-36	0.580049114336937	0.302	0.135	5.12161527695714e-32	4-cone PR1	PLEKHG5
NDFIP12	3.63042395490492e-36	0.483937348460532	0.626	0.465	5.51788136905999e-32	4-cone PR1	NDFIP1
SV2B3	1.45510998414544e-35	0.532501374070243	0.403	0.219	2.21162166490266e-31	4-cone PR1	SV2B
KIAA11073	1.03780055816352e-34	0.469542781393655	0.429	0.233	1.57735306835273e-30	4-cone PR1	KIAA1107
SNRK1	1.0637256664424e-34	0.521314271823731	0.359	0.183	1.6167566404258e-30	4-cone PR1	SNRK
ARL9	1.23103747962757e-34	0.534917533003092	0.37	0.198	1.87105386528594e-30	4-cone PR1	ARL9
STMN24	2.24263083854764e-34	0.369716234477616	0.45	0.237	3.40857461150856e-30	4-cone PR1	STMN2
ROBO23	7.62830894143953e-34	0.445280181902672	0.657	0.482	1.15942667600939e-29	4-cone PR1	ROBO2
CTNNA11	1.62399866104122e-33	0.565201405020197	0.366	0.198	2.46831556491656e-29	4-cone PR1	CTNNA1
ACOT7	4.03159702638541e-33	0.457065068093492	0.28	0.125	6.12762432040319e-29	4-cone PR1	ACOT7
UBALD11	9.94689955145251e-33	0.499872869862134	0.394	0.22	1.51182926282527e-28	4-cone PR1	UBALD1
EPB412	1.51006738014309e-32	0.439268160726064	0.671	0.514	2.29515141107949e-28	4-cone PR1	EPB41
VASH14	8.03467330791844e-32	0.524376184735815	0.427	0.261	1.22118999607052e-27	4-cone PR1	VASH1
DCTN13	1.17710188927585e-31	0.456522583973874	0.606	0.442	1.78907716151037e-27	4-cone PR1	DCTN1
ALDOC2	1.4349193887987e-31	0.324965580888396	0.859	0.767	2.18093397903514e-27	4-cone PR1	ALDOC
LDLRAD4	4.88289915089902e-31	0.454800712655175	0.275	0.126	7.42151841945142e-27	4-cone PR1	LDLRAD4
GZMM2	2.07869702634606e-30	0.531751982028907	0.442	0.28	3.15941161034337e-26	4-cone PR1	GZMM
GREB1L1	3.3392067664577e-30	0.471724798884959	0.309	0.151	5.07526036433906e-26	4-cone PR1	GREB1L
PLCH22	1.28258956322265e-29	0.420694989890493	0.375	0.198	1.94940787714211e-25	4-cone PR1	PLCH2
SAT12	2.80505267578101e-29	0.478766843525318	0.409	0.239	4.26339956191956e-25	4-cone PR1	SAT1
DACT2	2.95555600575026e-29	0.58614836644844	0.307	0.159	4.49214957313982e-25	4-cone PR1	DACT2
LOC100857299	4.63022628898118e-29	0.623041034463022	0.252	0.112	7.0374809366225e-25	4-cone PR1	LOC100857299
IP6K1	6.99172127188983e-29	0.513895402541105	0.346	0.191	1.06267171611453e-24	4-cone PR1	IP6K1
LMO4	7.8475894725256e-29	0.579674451084038	0.335	0.185	1.19275512392917e-24	4-cone PR1	LMO4
TRAPPC10	1.18601075482649e-28	0.460929895966201	0.324	0.17	1.80261774626078e-24	4-cone PR1	TRAPPC10
CST31	1.5540894884054e-28	0.513694479526399	0.512	0.356	2.36206061342736e-24	4-cone PR1	CST3
TPI12	3.83044220984694e-28	0.39144082291735	0.734	0.613	5.82188911474636e-24	4-cone PR1	TPI1
TWF1	1.14892828300818e-27	0.473286987232454	0.33	0.177	1.74625609734413e-23	4-cone PR1	TWF1
SEC61G2	2.77234327188049e-27	0.391438137317332	0.698	0.585	4.21368453893115e-23	4-cone PR1	SEC61G
PPIB	4.18772415277319e-27	0.381248948095237	0.739	0.653	6.36492193979998e-23	4-cone PR1	PPIB
CXXC51	7.65320856607902e-27	0.474315187767757	0.578	0.441	1.16321116995835e-22	4-cone PR1	CXXC5
CCDC50	3.23260786662462e-26	0.579974688246893	0.297	0.16	4.91324069648275e-22	4-cone PR1	CCDC50
CLMN3	4.0960077568509e-26	0.38916251590606	0.384	0.216	6.22552218963768e-22	4-cone PR1	CLMN
HIP13	9.60823116847011e-26	0.429616391605341	0.394	0.235	1.46035505529577e-21	4-cone PR1	HIP1
RSF11	1.33487439880252e-25	0.462673998225023	0.488	0.342	2.02887559873994e-21	4-cone PR1	RSF1
SYNGR12	1.52416734526795e-25	0.469166685461997	0.365	0.217	2.31658194807276e-21	4-cone PR1	SYNGR1
SFXN3	1.78341425391497e-25	0.492401023644811	0.252	0.122	2.71061132452536e-21	4-cone PR1	SFXN3
LASP1	3.90594104416595e-25	0.474769811021897	0.295	0.156	5.93663979302782e-21	4-cone PR1	LASP1
NCOA1	6.34105645272343e-25	0.465674692149331	0.341	0.2	9.63777170249434e-21	4-cone PR1	NCOA1
FAM103A11	1.54710080220737e-24	0.433367042458094	0.484	0.342	2.35143850927498e-20	4-cone PR1	FAM103A1
ULK1	2.8442091788156e-24	0.49602789903342	0.28	0.147	4.32291353088182e-20	4-cone PR1	ULK1
GDPD51	5.50841724163181e-24	0.410517679042217	0.309	0.167	8.37224336555619e-20	4-cone PR1	GDPD5
TTC81	1.72301853615295e-23	0.375517346199658	0.291	0.151	2.61881587309886e-19	4-cone PR1	TTC8
GPX42	1.81411694600516e-23	0.420672398546087	0.704	0.628	2.75727634623324e-19	4-cone PR1	GPX4
HMGCR2	2.53513526025762e-23	0.433711416199913	0.598	0.463	3.85315208206556e-19	4-cone PR1	HMGCR
EPHB1	6.57858830246037e-23	0.437239093938288	0.253	0.128	9.99879636090951e-19	4-cone PR1	EPHB1
TTYH23	9.22212486402377e-23	0.378106019613476	0.546	0.4	1.40167075808297e-18	4-cone PR1	TTYH2
NLK4	1.27439468863826e-22	0.407726834971717	0.37	0.228	1.93695248726129e-18	4-cone PR1	NLK
JARID2	1.41296296461708e-22	0.402207728827116	0.265	0.135	2.1475624099215e-18	4-cone PR1	JARID2
ZNF5932	1.67924109023298e-22	0.252468316791544	0.93	0.893	2.55227853304511e-18	4-cone PR1	ZNF593
AKAP92	4.68875923780784e-22	0.486696447822568	0.374	0.244	7.12644516554413e-18	4-cone PR1	AKAP9
IGF2BP2	5.60393206289228e-22	0.390865510379201	0.292	0.159	8.51741634238998e-18	4-cone PR1	IGF2BP2
ANK2	3.28862532635517e-21	0.453846727798441	0.326	0.195	4.99838163352722e-17	4-cone PR1	ANK2
TCF122	9.07514542638259e-21	0.38125108213097	0.621	0.51	1.37933135335589e-16	4-cone PR1	TCF12
BSG2	1.0118370603431e-20	0.378123008677701	0.621	0.519	1.53789114801548e-16	4-cone PR1	BSG
RAB11FIP4	1.70839675899967e-20	0.429583885064955	0.289	0.166	2.5965922340036e-16	4-cone PR1	RAB11FIP4
SELENOS	8.0376037233568e-20	0.423977822088611	0.329	0.204	1.221635389913e-15	4-cone PR1	SELENOS
SYT113	1.53595151784555e-19	0.355622573994931	0.537	0.407	2.33449271197345e-15	4-cone PR1	SYT11
CPE2	2.28786102699335e-19	0.348579990518539	0.699	0.611	3.47731997492719e-15	4-cone PR1	CPE
SIX61	2.55072633546155e-19	0.256531533412294	0.923	0.902	3.87684895726801e-15	4-cone PR1	SIX6
SEPT72	2.97672514444368e-19	0.364753883720015	0.615	0.516	4.52432454703995e-15	4-cone PR1	SEPT7
BZW22	4.7570907871748e-19	0.403102526126276	0.507	0.391	7.23030228742698e-15	4-cone PR1	BZW2
MYCL2	4.79765316409811e-19	0.403019032220468	0.343	0.214	7.29195304411272e-15	4-cone PR1	MYCL
DOT1L2	6.21601809507926e-19	0.371772291777775	0.399	0.27	9.44772590271096e-15	4-cone PR1	DOT1L
KIF25	9.64718217719136e-19	0.406844060090583	0.26	0.142	1.46627521911132e-14	4-cone PR1	KIF25
ERNI3	1.55384396332118e-18	0.548481170256552	0.393	0.264	2.36168743985186e-14	4-cone PR1	ERNI
JAM31	2.36120485836366e-18	0.38283274920828	0.319	0.195	3.58879526422693e-14	4-cone PR1	JAM3
CDC42BPA3	2.79080977925276e-18	0.353752416149816	0.388	0.255	4.24175178348626e-14	4-cone PR1	CDC42BPA
YBX33	4.31923585886733e-18	0.344010356197534	0.655	0.562	6.56480658189245e-14	4-cone PR1	YBX3
CHST10	4.86043735064455e-18	0.426333843160075	0.263	0.152	7.38737872924465e-14	4-cone PR1	CHST10
LRRC3C1	1.22384577976704e-17	0.398979251488758	0.327	0.206	1.86012320066792e-13	4-cone PR1	LRRC3C
LOC112530494	1.34999629408768e-17	0.283037580712965	0.816	0.784	2.05185936738387e-13	4-cone PR1	LOC112530494
MEA12	2.74881325242891e-17	0.394077768960571	0.355	0.236	4.17792126236669e-13	4-cone PR1	MEA1
TP53INP2	3.78293634960614e-17	0.351091993046058	0.274	0.158	5.74968495776638e-13	4-cone PR1	TP53INP2
ENO2	1.18951524287548e-16	0.362455373430441	0.282	0.167	1.80794421764644e-12	4-cone PR1	ENO2
ZBTB181	1.74521371744769e-16	0.313549800936345	0.656	0.565	2.65255032914874e-12	4-cone PR1	ZBTB18
TMEM1982	2.54376866701968e-16	0.310734878665906	0.511	0.395	3.86627399700321e-12	4-cone PR1	TMEM198
CLSTN31	3.74345875820085e-16	0.324379000510445	0.277	0.164	5.68968296658948e-12	4-cone PR1	CLSTN3
DIP2B	3.81912791647428e-16	0.363683572776035	0.276	0.169	5.80469252024927e-12	4-cone PR1	DIP2B
ETFA1	6.78489980492167e-16	0.369469787871328	0.334	0.224	1.03123692135004e-11	4-cone PR1	ETFA
CBY1	7.10405189514127e-16	0.373958005930248	0.271	0.166	1.07974484754252e-11	4-cone PR1	CBY1
BRK11	9.31378378719565e-16	0.302569211545312	0.636	0.565	1.41560199781587e-11	4-cone PR1	BRK1
OAZ21	1.20580214698266e-15	0.340296075085959	0.448	0.334	1.83269868319894e-11	4-cone PR1	OAZ2
ENC1	1.29351780419708e-15	0.334452084639009	0.253	0.146	1.96601771059914e-11	4-cone PR1	ENC1
NEK61	1.68574615458226e-15	0.30168622838818	0.306	0.188	2.56216558034958e-11	4-cone PR1	NEK6
HSP90B12	4.21718002954518e-15	0.454661745172392	0.407	0.305	6.40969192690572e-11	4-cone PR1	HSP90B1
BRD21	4.45513595277806e-15	0.284996993715847	0.631	0.546	6.77136113462737e-11	4-cone PR1	BRD2
ARL4A4	4.52236465666871e-15	0.379763043681427	0.395	0.287	6.87354204167078e-11	4-cone PR1	ARL4A
CRNKL1	7.49992722265772e-15	0.341935712347978	0.282	0.177	1.13991393857175e-10	4-cone PR1	CRNKL1
CHD72	7.60415565152504e-15	0.27946199717637	0.745	0.693	1.15575561747529e-10	4-cone PR1	CHD7
TMEM132A3	1.24242440636249e-14	0.351962153052278	0.355	0.242	1.88836085523036e-10	4-cone PR1	TMEM132A
CHCHD10	1.50272749818914e-14	0.365244818273405	0.424	0.322	2.28399552449768e-10	4-cone PR1	CHCHD10
RGS32	3.12686583785979e-14	0.291876650421062	0.458	0.34	4.75252338696309e-10	4-cone PR1	RGS3
UNC1193	4.58487626624913e-14	0.27127445017429	0.413	0.288	6.96855343707205e-10	4-cone PR1	UNC119
GPRC5B	1.2015378322256e-13	0.283218443533368	0.256	0.152	1.8262173511997e-09	4-cone PR1	GPRC5B
PLEKHB1	6.29997753426046e-13	0.348360480218846	0.336	0.232	9.57533585432247e-09	4-cone PR1	PLEKHB1
NIN1	6.74892864258782e-13	0.367565568259375	0.345	0.249	1.02576966438692e-08	4-cone PR1	NIN
KIFAP31	7.24773008027278e-13	0.356733307829343	0.322	0.226	1.10158249490066e-08	4-cone PR1	KIFAP3
GPX11	1.02002869352763e-12	0.34335412901523	0.255	0.162	1.55034161129265e-08	4-cone PR1	GPX1
ZFAND31	2.53619781332971e-12	0.299418350864236	0.262	0.167	3.85476705647983e-08	4-cone PR1	ZFAND3
CETN3	3.12954622665875e-12	0.326350618532851	0.26	0.169	4.75659730989863e-08	4-cone PR1	CETN3
LOC7683921	4.06862040597201e-12	0.359002257828722	0.297	0.197	6.18389615503686e-08	4-cone PR1	LOC768392
APP3	4.08917405966961e-12	0.32810535462767	0.494	0.417	6.21513565329184e-08	4-cone PR1	APP
PAQR93	4.44872453152352e-12	0.330080431367154	0.38	0.281	6.76161641546259e-08	4-cone PR1	PAQR9
DIXDC12	5.45183364151042e-12	0.302352082749555	0.307	0.204	8.28624195173168e-08	4-cone PR1	DIXDC1
NECTIN11	6.14944602319146e-12	0.263489941856108	0.547	0.472	9.3465430106487e-08	4-cone PR1	NECTIN1
TACC23	6.17940436359315e-12	0.280816650924873	0.369	0.266	9.39207669222523e-08	4-cone PR1	TACC2
SERINC13	6.85125722873842e-12	0.262946331725768	0.668	0.597	1.04132258619595e-07	4-cone PR1	SERINC1
KIAA0513	7.69775038250409e-12	0.290470920152469	0.275	0.181	1.1699810806368e-07	4-cone PR1	KIAA0513
MKNK2	7.90436973891496e-12	0.28429168023104	0.269	0.174	1.20138515661769e-07	4-cone PR1	MKNK2
PIN41	8.21255370776922e-12	0.255350054345581	0.468	0.367	1.24822603804384e-07	4-cone PR1	PIN4
ATP2A22	1.52548182837942e-11	0.315959902783361	0.4	0.306	2.31857983095389e-07	4-cone PR1	ATP2A2
HEXIM12	1.78103065133165e-11	0.291494541333889	0.591	0.523	2.70698848695897e-07	4-cone PR1	HEXIM1
AP3D11	1.80038475854564e-11	0.302150270426649	0.458	0.372	2.73640479451351e-07	4-cone PR1	AP3D1
CYP51A11	4.51086529043285e-11	0.386530933340548	0.37	0.283	6.85606415492889e-07	4-cone PR1	CYP51A1
NOL9	5.15672804488354e-11	0.295610917929128	0.524	0.456	7.83771095541848e-07	4-cone PR1	NOL9
SLC23A21	6.10530602736158e-11	0.331790753052132	0.329	0.242	9.27945463098686e-07	4-cone PR1	SLC23A2
RASSF21	6.37698343315983e-11	0.279460852513329	0.277	0.185	9.69237712005963e-07	4-cone PR1	RASSF2
DDIT31	6.6162708022697e-11	0.511986793786555	0.36	0.275	1.00560699923697e-06	4-cone PR1	DDIT3
MTFP11	1.09671809024062e-10	0.324677577311687	0.341	0.252	1.66690182535672e-06	4-cone PR1	MTFP1
EPN21	1.41148000230434e-10	0.317848383899314	0.413	0.33	2.14530845550236e-06	4-cone PR1	EPN2
HSPA82	1.76023720837706e-10	0.46208927521321	0.605	0.557	2.6753845330123e-06	4-cone PR1	HSPA8
CNPY21	2.8672472032542e-10	0.285737333439909	0.335	0.248	4.35792902422605e-06	4-cone PR1	CNPY2
TRIM9	3.18290417226855e-10	0.307527544157185	0.26	0.176	4.83769605143097e-06	4-cone PR1	TRIM9
YTHDF2	3.72975525910642e-10	0.292105903323533	0.297	0.213	5.66885501831584e-06	4-cone PR1	YTHDF2
RBM52	5.17206580346755e-10	0.258550855150619	0.454	0.369	7.86102281469033e-06	4-cone PR1	RBM5
PPM1A	5.36665523133851e-10	0.283601351032171	0.355	0.27	8.1567792861114e-06	4-cone PR1	PPM1A
CADM12	7.65255509859232e-10	0.317397543468135	0.636	0.585	1.16311184943505e-05	4-cone PR1	CADM1
EHBP11	9.94308363378944e-10	0.316110028685708	0.302	0.223	1.51124928149966e-05	4-cone PR1	EHBP1
ANP32A2	1.38497067895909e-09	0.316738963660779	0.439	0.361	2.10501693494992e-05	4-cone PR1	ANP32A
NRIP12	2.23455784767424e-09	0.310082032728945	0.407	0.332	3.39630447268007e-05	4-cone PR1	NRIP1
IDI12	3.71927468480855e-09	0.307463618442662	0.302	0.223	5.65292559344051e-05	4-cone PR1	IDI1
LOC107052740	3.76498479117472e-09	0.329623099913621	0.363	0.289	5.72240038410646e-05	4-cone PR1	LOC107052740
RBP51	4.47043116237299e-09	0.320537379835668	0.36	0.284	6.7946083236907e-05	4-cone PR1	RBP5
HTRA11	4.54299920095171e-09	0.271760048990548	0.309	0.228	6.9049044855265e-05	4-cone PR1	HTRA1
SMARCC1	4.61828566776345e-09	0.254674774312569	0.571	0.509	7.01933238643367e-05	4-cone PR1	SMARCC1
MSMO12	7.01492961527767e-09	0.352233134222698	0.404	0.33	0.000106619915222605	4-cone PR1	MSMO1
RBM39	9.20187998012393e-09	0.266976705109994	0.476	0.408	0.000139859373817904	4-cone PR1	RBM39
ATP6V1G1	1.06313079149302e-08	0.267162778062621	0.545	0.493	0.000161585248999023	4-cone PR1	ATP6V1G1
LCOR2	1.14381867665202e-08	0.269697639464701	0.315	0.238	0.000173849000664341	4-cone PR1	LCOR
INSIG12	1.42919446045838e-08	0.303310458992426	0.315	0.237	0.00021722326604507	4-cone PR1	INSIG1
FAM76B1	1.75600941939251e-08	0.321976224364678	0.294	0.226	0.000266895871653468	4-cone PR1	FAM76B
HSPE12	2.15067365021871e-08	0.261527731833207	0.484	0.428	0.000326880888096742	4-cone PR1	HSPE1
MMP15	2.40063505030295e-08	0.26888870115939	0.375	0.307	0.000364872521295546	4-cone PR1	MMP15
CKAP42	4.39133568705637e-08	0.266712504665864	0.34	0.268	0.000667439111075698	4-cone PR1	CKAP4
CKMT1A1	6.76775379263925e-08	0.319156974990178	0.349	0.28	0.00102863089894324	4-cone PR1	CKMT1A
NAV13	7.23599728892933e-08	0.292462705836001	0.307	0.231	0.00109979922794437	4-cone PR1	NAV1
NUFIP2	9.50188249603794e-08	0.254787448457182	0.275	0.202	0.00144419112057281	4-cone PR1	NUFIP2
TEAD11	1.00392551587182e-07	0.289632675049191	0.322	0.25	0.00152586639157358	4-cone PR1	TEAD1
ASH1L2	1.29919124826361e-07	0.263314004949537	0.361	0.297	0.00197464077823587	4-cone PR1	ASH1L
HSP90AA12	1.41008460000699e-07	0.631641292603898	0.483	0.439	0.00214318758355063	4-cone PR1	HSP90AA1
GHITM	1.96199646272962e-07	0.279199283203251	0.381	0.325	0.00298203842370275	4-cone PR1	GHITM
HSPA5	2.65619338320257e-07	0.437721864215522	0.429	0.377	0.00403714832312958	4-cone PR1	HSPA5
LOC107054741	4.31495615397881e-07	0.340147012314867	0.447	0.409	0.0065583018584324	4-cone PR1	LOC107054741
CDKN1B	5.44929303982079e-07	0.280621067842594	0.374	0.321	0.00828238049122362	4-cone PR1	CDKN1B
RPE	7.84835709646851e-07	0.250457215790782	0.267	0.203	0.0119287179509225	4-cone PR1	RPE
RAB3A	8.29334990757631e-07	0.263938031704083	0.276	0.213	0.0126050625245252	4-cone PR1	RAB3A
FDPS1	2.61806382062906e-06	0.27650475638266	0.417	0.364	0.0397919520097411	4-cone PR1	FDPS
XBP11	3.42700836006888e-06	0.271031059577468	0.312	0.254	0.0520871000646869	4-cone PR1	XBP1
ENOPH11	3.77574347877599e-06	0.25099537172221	0.267	0.208	0.0573875251339163	4-cone PR1	ENOPH1
REXO2	5.89196134502685e-06	0.255606939021951	0.312	0.26	0.0895519204830631	4-cone PR1	REXO2
HSPA9	8.72257587826859e-06	0.263555473363719	0.301	0.247	0.132574430773804	4-cone PR1	HSPA9
UBB1	1.30752701218237e-05	0.301559793836352	0.866	0.854	0.198731030581599	4-cone PR1	UBB
DCLK21	4.07044604266661e-05	0.255308134596764	0.363	0.322	0.618667094024898	4-cone PR1	DCLK2
FDFT11	0.000101470675565829	0.284858268428186	0.314	0.269	1	4-cone PR1	FDFT1
THRB4	2.77962738495688e-243	1.07038998479066	0.7	0.146	4.22475566239597e-239	5-cone PR2	THRB
KIF251	8.7774037088222e-218	0.972177578716436	0.546	0.094	1.33407758970389e-213	5-cone PR2	KIF25
TOP2A4	3.46279471581546e-207	0.969562318883901	0.963	0.411	5.26310168856792e-203	5-cone PR2	TOP2A
UBE2C4	7.06267712065155e-203	1.02476374864328	0.951	0.407	1.07345629556783e-198	5-cone PR2	UBE2C
NUSAP14	1.18159818397546e-193	0.971548846688562	0.85	0.296	1.7959110798243e-189	5-cone PR2	NUSAP1
SAMD10	1.71919214065981e-193	0.813622318158617	0.399	0.047	2.61300013458885e-189	5-cone PR2	SAMD10
RXRG4	2.47710630492229e-189	0.788508137951811	0.956	0.38	3.76495387285138e-185	5-cone PR2	RXRG
CAMK1D	1.75635417755956e-176	0.961153617017425	0.576	0.137	2.66948271447278e-172	5-cone PR2	CAMK1D
CKS1B4	3.99798033770818e-175	0.891589189523418	0.934	0.469	6.07653031528267e-171	5-cone PR2	CKS1B
MKI674	1.18276180587171e-174	0.903812974863601	0.826	0.295	1.79767966874441e-170	5-cone PR2	MKI67
BORL44	2.29306969742406e-173	0.871158762401301	0.939	0.41	3.48523663311483e-169	5-cone PR2	BORL4
H2AFV4	3.18015264994685e-173	0.680558716215291	0.995	0.924	4.83351401265422e-169	5-cone PR2	H2AFV
CENPF5	9.28713501568797e-173	0.969765807709989	0.812	0.287	1.41155165103441e-168	5-cone PR2	CENPF
RBP45	4.64866132193242e-161	0.870443340342918	1	0.593	7.06550034320508e-157	5-cone PR2	RBP4
KCNH7	4.99355217131659e-159	0.890140686156055	0.489	0.103	7.58969994518408e-155	5-cone PR2	KCNH7
CDCA34	9.43487862057936e-155	0.797147356260383	0.912	0.374	1.43400720154186e-150	5-cone PR2	CDCA3
HMGB24	2.17197432334486e-151	0.784735694944418	0.975	0.597	3.30118377405186e-147	5-cone PR2	HMGB2
ASPM4	9.81702860089145e-150	0.925617773340046	0.736	0.273	1.49209017704949e-145	5-cone PR2	ASPM
HMGB14	1.80053815533265e-148	0.679060380899939	0.989	0.809	2.73663794229009e-144	5-cone PR2	HMGB1
SALL11	7.88513729709095e-142	0.698594815161476	0.564	0.145	1.19846201778485e-137	5-cone PR2	SALL1
SHANK32	1.23356411055787e-141	0.873831634883082	0.634	0.21	1.8748940916369e-137	5-cone PR2	SHANK3
LOC1070500244	4.95904985242495e-136	0.829704482380813	0.761	0.315	7.53725987070068e-132	5-cone PR2	LOC107050024
PPP2R2B1	1.00405018276778e-134	0.666960312404402	0.358	0.057	1.52605587278875e-130	5-cone PR2	PPP2R2B
KIFC14	2.14486577392849e-130	0.774249416588288	0.711	0.27	3.25998148979391e-126	5-cone PR2	KIFC1
NANOS11	6.00762585463759e-130	0.895229268810856	0.491	0.126	9.13099053646368e-126	5-cone PR2	NANOS1
KIF4A4	1.96587712459545e-129	0.759219758698507	0.798	0.325	2.98793664167262e-125	5-cone PR2	KIF4A
CKAP24	3.28848611600746e-129	0.725921873875537	0.784	0.302	4.99817004771974e-125	5-cone PR2	CKAP2
KIFC1L4	4.17744940400048e-128	0.772731468889208	0.699	0.261	6.34930534914033e-124	5-cone PR2	KIFC1L
TPX24	8.22613717253502e-127	0.742736037365916	0.764	0.307	1.2502905888536e-122	5-cone PR2	TPX2
ISL21	6.07027421563654e-126	0.63802749312575	0.401	0.078	9.22620978034598e-122	5-cone PR2	ISL2
INCENP4	6.20084006950489e-122	0.704701284771856	0.671	0.24	9.42465682164048e-118	5-cone PR2	INCENP
NTM4	4.93371642102811e-121	0.63954543229207	0.666	0.22	7.49875558832063e-117	5-cone PR2	NTM
CCNB24	7.70426331936082e-117	0.74796803750237	0.625	0.229	1.17097098190965e-112	5-cone PR2	CCNB2
BIRC54	1.46208379420022e-116	0.737510226555939	0.684	0.264	2.22222115880492e-112	5-cone PR2	BIRC5
SPDL11	3.06033739104738e-116	0.762160898052549	0.52	0.163	4.65140680065291e-112	5-cone PR2	SPDL1
SMC24	3.93551024527778e-115	0.789594197460462	0.631	0.233	5.98158202179769e-111	5-cone PR2	SMC2
CDK14	1.89914503923925e-111	0.620821156780476	0.751	0.296	2.88651054513973e-107	5-cone PR2	CDK1
PLK14	3.42722203793647e-111	0.705046060959352	0.607	0.21	5.20903477545963e-107	5-cone PR2	PLK1
HMGN44	2.21679618835464e-110	0.604695052758232	0.966	0.673	3.36930852668022e-106	5-cone PR2	HMGN4
PRC14	3.97640773666892e-110	0.741215690628999	0.625	0.227	6.04374211896309e-106	5-cone PR2	PRC1
CENPE2	9.87217692299094e-109	0.709294173538883	0.524	0.169	1.50047217052539e-104	5-cone PR2	CENPE
FRMD11	5.28869466251611e-108	0.681259122543036	0.463	0.127	8.03828701755823e-104	5-cone PR2	FRMD1
SPAG55	1.25247048317246e-105	0.655210180386533	0.887	0.501	1.90362988737382e-101	5-cone PR2	SPAG5
TUBA1A13	4.60558774417318e-105	0.463540850992909	0.995	0.96	7.00003281236881e-101	5-cone PR2	TUBA1A1
KPNA24	1.2686190489182e-104	0.698904263268986	0.641	0.242	1.92817409245078e-100	5-cone PR2	KPNA2
TACC33	2.87277491283087e-100	0.661622212473681	0.521	0.175	4.36633059001164e-96	5-cone PR2	TACC3
SGO11	1.30686457050402e-99	0.649111557822371	0.504	0.164	1.98630346070906e-95	5-cone PR2	SGO1
G2E34	8.2953708745641e-99	0.695936153710481	0.524	0.182	1.260813419225e-94	5-cone PR2	G2E3
CDC204	3.65935500551682e-98	0.728811751737607	0.592	0.218	5.56185367288502e-94	5-cone PR2	CDC20
IMPG25	5.09932309201462e-98	0.564765102032992	0.645	0.236	7.75046116755302e-94	5-cone PR2	IMPG2
UBE2T	5.0808840651417e-97	0.580250044141121	0.401	0.107	7.72243569060888e-93	5-cone PR2	UBE2T
MXD34	6.34756810611955e-97	0.691716234486676	0.634	0.25	9.64766876449111e-93	5-cone PR2	MXD3
PTGFRN	1.23787071644454e-95	0.593925213838319	0.306	0.063	1.88143970192405e-91	5-cone PR2	PTGFRN
LBR5	1.52451449094311e-92	0.547427445256332	0.947	0.663	2.31710957478444e-88	5-cone PR2	LBR
NFASC5	3.13588073393633e-90	0.597293493997449	0.747	0.346	4.76622512750982e-86	5-cone PR2	NFASC
CENPW4	3.31267595120865e-89	0.636346991956141	0.552	0.209	5.03493617824202e-85	5-cone PR2	CENPW
BUB1B4	2.85746298651337e-88	0.668308755942305	0.566	0.219	4.34305799320168e-84	5-cone PR2	BUB1B
DCK5	4.49596713135837e-87	0.577857622424057	0.566	0.216	6.83342044295159e-83	5-cone PR2	DCK
KIF20A1	1.51800059057711e-86	0.637103488872953	0.442	0.142	2.30720909761815e-82	5-cone PR2	KIF20A
LOC1017521062	3.70360068602333e-86	0.514250022368282	0.466	0.141	5.62910268268685e-82	5-cone PR2	LOC101752106
AURKA1	1.02524136724966e-85	0.640376478803469	0.448	0.149	1.55826435408276e-81	5-cone PR2	AURKA
DLGAP54	4.36097724149967e-85	0.642003630580449	0.517	0.19	6.62824930935534e-81	5-cone PR2	DLGAP5
RAD214	6.72846936013622e-85	0.638252173164605	0.748	0.396	1.0226600580471e-80	5-cone PR2	RAD21
NDUFA134	1.32076382622678e-84	0.531182375270929	0.948	0.775	2.00742893948209e-80	5-cone PR2	NDUFA13
WTIP	2.09265916925223e-82	0.581867807398894	0.353	0.096	3.18063267134647e-78	5-cone PR2	WTIP
TMPO4	3.17185337394479e-82	0.584831873364741	0.731	0.355	4.82089994305868e-78	5-cone PR2	TMPO
PBK4	2.10108446190322e-81	0.577066127029222	0.507	0.185	3.1934382736467e-77	5-cone PR2	PBK
FAM72A1	4.45365500282224e-81	0.626023189998116	0.443	0.15	6.76911023878952e-77	5-cone PR2	FAM72A
HIST1H1034	3.05758529361628e-80	0.839514752525236	0.877	0.689	4.64722388776738e-76	5-cone PR2	HIST1H103
FBXO391	1.64281609013317e-78	0.554481912247284	0.374	0.111	2.49691617539341e-74	5-cone PR2	FBXO39
MAD2L14	2.26751214392218e-78	0.562173205960983	0.549	0.222	3.44639170754731e-74	5-cone PR2	MAD2L1
SH3KBP11	1.31860048978259e-77	0.546570586600132	0.48	0.169	2.00414088442055e-73	5-cone PR2	SH3KBP1
ARHGAP11A1	3.46406324489181e-77	0.600536202885826	0.42	0.141	5.26502972591107e-73	5-cone PR2	ARHGAP11A
MEIS25	7.25552185011923e-77	0.533166852611918	0.682	0.317	1.10276676599962e-72	5-cone PR2	MEIS2
H2AFZ4	2.55290137243219e-75	0.453344855200979	0.956	0.732	3.88015479595968e-71	5-cone PR2	H2AFZ
NEK21	2.80892900960193e-75	0.598073416142047	0.407	0.134	4.26929120169397e-71	5-cone PR2	NEK2
TAGLN34	2.88285766328527e-75	0.682376446771369	0.858	0.601	4.38165536242728e-71	5-cone PR2	TAGLN3
HMMR1	2.93831558488804e-75	0.609453915006209	0.419	0.142	4.46594585747134e-71	5-cone PR2	HMMR
KRAS4	5.82867304737199e-75	0.530099620861555	0.777	0.447	8.85900016470069e-71	5-cone PR2	KRAS
TUBB4B4	1.41909745853869e-74	0.410586945299746	0.934	0.616	2.15688622723296e-70	5-cone PR2	TUBB4B
EGFLAM4	3.51099035083233e-74	0.346556878192407	0.544	0.19	5.33635423423006e-70	5-cone PR2	EGFLAM
NUCKS14	8.33968997812364e-73	0.497336662128169	0.902	0.623	1.26754947977501e-68	5-cone PR2	NUCKS1
CKAP54	1.48534570967559e-71	0.589192295486037	0.626	0.303	2.25757694413593e-67	5-cone PR2	CKAP5
TUBB4	1.53967353586093e-69	0.451817531871822	0.946	0.794	2.34014980715503e-65	5-cone PR2	TUBB
CCSAP1	6.98657450248392e-69	0.579498427887008	0.408	0.141	1.06188945863253e-64	5-cone PR2	CCSAP
PLEKHG51	3.70593299811645e-68	0.450853090985824	0.389	0.122	5.63264756383719e-64	5-cone PR2	PLEKHG5
GSTAL21	1.45273278409666e-67	0.578798180407457	0.357	0.112	2.20800855854851e-63	5-cone PR2	GSTAL2
UHRF14	9.79904083457761e-67	0.532913206520086	0.599	0.275	1.48935621644745e-62	5-cone PR2	UHRF1
KIF2C1	1.96780351875121e-66	0.586776469368427	0.427	0.16	2.99086456814997e-62	5-cone PR2	KIF2C
PTBP3	3.18826675297233e-65	0.477282208453382	0.267	0.066	4.84584663784265e-61	5-cone PR2	PTBP3
CLSTN15	5.47191391426146e-65	0.338961398265806	0.92	0.689	8.316761958286e-61	5-cone PR2	CLSTN1
DEK4	1.55732031086068e-64	0.530318729597445	0.633	0.313	2.36697114047714e-60	5-cone PR2	DEK
PNRC24	9.25265600860853e-64	0.52753274677502	0.659	0.342	1.40631118674841e-59	5-cone PR2	PNRC2
ANKLE1	1.83903428508898e-63	0.461102149939155	0.261	0.068	2.79514820990674e-59	5-cone PR2	ANKLE1
TPBGL1	3.17795983993185e-63	0.523414910127865	0.358	0.114	4.83018116071242e-59	5-cone PR2	TPBGL
HMGN54	1.290319182364e-62	0.404837400821503	0.955	0.771	1.96115612527504e-58	5-cone PR2	HMGN5
MIS18BP11	6.95354866165953e-62	0.532842318868732	0.431	0.168	1.05686986108563e-57	5-cone PR2	MIS18BP1
TTK1	7.77198181482277e-62	0.493507315915989	0.367	0.128	1.18126351603491e-57	5-cone PR2	TTK
MRPL514	2.19107603297843e-61	0.488237408436283	0.838	0.586	3.33021646252391e-57	5-cone PR2	MRPL51
CDC42BPA4	2.25769317074633e-61	0.551291942553947	0.523	0.233	3.43146785021734e-57	5-cone PR2	CDC42BPA
KNSTRN4	1.51627778903869e-59	0.482139797612277	0.499	0.212	2.3045906115599e-55	5-cone PR2	KNSTRN
NNF14	3.63944096928372e-58	0.503776780139706	0.558	0.266	5.53158632921433e-54	5-cone PR2	NNF1
NASP3	4.09299065343078e-58	0.530922206028947	0.719	0.416	6.22093649414944e-54	5-cone PR2	NASP
CSNK1G12	1.25927870571937e-57	0.478727086954783	0.796	0.524	1.91397770482286e-53	5-cone PR2	CSNK1G1
NCAPH1	2.3999528939836e-57	0.500643503957815	0.428	0.174	3.64768840356567e-53	5-cone PR2	NCAPH
JPT14	3.25523640262244e-57	0.480611987060629	0.838	0.576	4.94763380834584e-53	5-cone PR2	JPT1
NET11	4.43196483722933e-57	0.505792000221007	0.363	0.132	6.73614335610486e-53	5-cone PR2	NET1
ADAMTS35	5.16967871045739e-57	0.391192721045011	0.593	0.264	7.85739467202419e-53	5-cone PR2	ADAMTS3
GPSM21	1.72855625975008e-56	0.501969693018504	0.435	0.18	2.62723265919415e-52	5-cone PR2	GPSM2
RIMS1	2.80759714060974e-56	0.418600832378478	0.284	0.082	4.26726689401274e-52	5-cone PR2	RIMS1
RACGAP11	7.28643666196326e-56	0.4953503430942	0.416	0.169	1.1074655082518e-51	5-cone PR2	RACGAP1
NAP1L14	3.73910132558471e-55	0.474269691404789	0.836	0.573	5.68306010475621e-51	5-cone PR2	NAP1L1
WEE11	7.1341420795546e-55	0.517308136273391	0.398	0.158	1.0843182546715e-50	5-cone PR2	WEE1
PLK41	9.36851357423915e-55	0.484373162042777	0.336	0.12	1.42392037814861e-50	5-cone PR2	PLK4
CENPH1	1.7247658004233e-54	0.490736453877627	0.405	0.162	2.62147154006337e-50	5-cone PR2	CENPH
GPR273	1.98806697443399e-54	0.509139277289959	0.497	0.226	3.02166299444222e-50	5-cone PR2	GPR27
H1FX4	3.19447577571386e-54	0.417229838316235	0.918	0.666	4.8552837315075e-50	5-cone PR2	H1FX
SMC44	4.37765687482022e-54	0.484700220869496	0.462	0.202	6.65360068403925e-50	5-cone PR2	SMC4
ROBO24	6.48460120831043e-54	0.466005657455105	0.741	0.47	9.85594537651103e-50	5-cone PR2	ROBO2
RAPGEF51	1.53556264666422e-53	0.419371855431679	0.341	0.113	2.33390166666495e-49	5-cone PR2	RAPGEF5
HNRNPA3	2.39557986291363e-53	0.386560728728511	0.954	0.814	3.64104183364243e-49	5-cone PR2	HNRNPA3
NCAPD21	2.97997466697141e-53	0.499467872288605	0.383	0.152	4.52926349632985e-49	5-cone PR2	NCAPD2
TCF123	3.82889381005779e-53	0.481104730094615	0.757	0.488	5.81953570190683e-49	5-cone PR2	TCF12
KIF151	3.83403336768608e-53	0.498268803724411	0.355	0.134	5.82734731554608e-49	5-cone PR2	KIF15
RRM22	4.35154921596263e-53	0.535610731461314	0.442	0.187	6.61391965334161e-49	5-cone PR2	RRM2
HINTW	5.50043055401745e-53	0.269312768354205	0.999	0.995	8.36010439905113e-49	5-cone PR2	HINTW
PPP2R5A1	9.97029900134839e-53	0.520948369369086	0.496	0.236	1.51538574521494e-48	5-cone PR2	PPP2R5A
NDC801	9.99861453670276e-52	0.501153354704662	0.35	0.133	1.51968942343345e-47	5-cone PR2	NDC80
ARL6IP14	2.90026872100357e-51	0.532899254421738	0.538	0.272	4.40811842905332e-47	5-cone PR2	ARL6IP1
ATAD2	7.4745236435225e-51	0.418863383681	0.268	0.083	1.13605284857899e-46	5-cone PR2	ATAD2
GTSE11	3.66811859522051e-50	0.431112056027537	0.273	0.088	5.57517345287566e-46	5-cone PR2	GTSE1
CBFA2T35	4.70426680336076e-50	0.389146753043263	0.611	0.302	7.15001511442802e-46	5-cone PR2	CBFA2T3
PTPRG	4.81640681216195e-50	0.431917083391362	0.334	0.118	7.32045671380495e-46	5-cone PR2	PTPRG
FSTL54	4.68330947570894e-49	0.385346606675887	0.688	0.367	7.11816207213002e-45	5-cone PR2	FSTL5
CENPA4	4.71549241133723e-49	0.440774084341021	0.495	0.23	7.16707691599145e-45	5-cone PR2	CENPA
SPC254	6.75312337070741e-49	0.43789154532701	0.496	0.23	1.02640722111382e-44	5-cone PR2	SPC25
BUB11	1.05059696362403e-48	0.459145707092105	0.336	0.128	1.59680232501216e-44	5-cone PR2	BUB1
RRM14	1.18198974138878e-48	0.455451553311123	0.513	0.248	1.7965062079368e-44	5-cone PR2	RRM1
SAMD71	1.30115695950592e-48	0.344381102788421	0.395	0.147	1.97762846275304e-44	5-cone PR2	SAMD7
TERF11	2.88906703360926e-48	0.4365493039794	0.32	0.118	4.39109298438271e-44	5-cone PR2	TERF1
NCAPH21	2.30843626404307e-46	0.427880952076695	0.28	0.097	3.50859227771906e-42	5-cone PR2	NCAPH2
KIF18A1	2.96447283197181e-46	0.436690208658426	0.288	0.102	4.50570225731395e-42	5-cone PR2	KIF18A
PTTG12	5.94597088335502e-46	0.5082791578405	0.42	0.187	9.03728114561129e-42	5-cone PR2	PTTG1
PRDM14	2.48288410120537e-45	0.314269155026768	0.649	0.335	3.77373554542204e-41	5-cone PR2	PRDM1
TSC22D11	3.22909679369606e-45	0.407163299257599	0.873	0.694	4.90790421673864e-41	5-cone PR2	TSC22D1
MFAP3L	2.46533357657641e-44	0.407044824793491	0.347	0.136	3.74706050303849e-40	5-cone PR2	MFAP3L
CDCA21	2.7220114985109e-44	0.405761190305641	0.268	0.092	4.13718527658672e-40	5-cone PR2	CDCA2
DHRS3	2.9104439079259e-44	0.462363574183903	0.328	0.125	4.42358369565657e-40	5-cone PR2	DHRS3
BRCA11	8.46316508711728e-44	0.428294438291684	0.328	0.129	1.28631646159095e-39	5-cone PR2	BRCA1
POU2F13	8.68529752598722e-44	0.459669013957439	0.541	0.289	1.3200783709748e-39	5-cone PR2	POU2F1
SAPCD21	1.98053722636954e-43	0.450836666539786	0.357	0.148	3.01021853035906e-39	5-cone PR2	SAPCD2
EPB413	2.47297093476237e-43	0.406182227566238	0.753	0.502	3.75866852374532e-39	5-cone PR2	EPB41
DSN14	6.00093092216608e-43	0.44000252950095	0.512	0.261	9.12081490860023e-39	5-cone PR2	DSN1
HELLS2	7.29705513884424e-43	0.455339916251537	0.416	0.194	1.10907941055294e-38	5-cone PR2	HELLS
NSMCE34	9.01932358589657e-43	0.470073869921802	0.534	0.294	1.37084699182042e-38	5-cone PR2	NSMCE3
HNRNPA04	1.15973548205888e-42	0.400657344184719	0.844	0.611	1.76268195918129e-38	5-cone PR2	HNRNPA0
CALM24	3.659191703207e-42	0.439694703577956	0.74	0.49	5.56160546970431e-38	5-cone PR2	CALM2
TICRR1	1.30796536262962e-41	0.404042338552731	0.276	0.1	1.98797655466077e-37	5-cone PR2	TICRR
SEPT73	6.00990466851297e-41	0.420026612715772	0.736	0.496	9.13445410567286e-37	5-cone PR2	SEPT7
HNRNPA2B11	6.3064538006001e-41	0.315472804685355	0.944	0.833	9.58517913153209e-37	5-cone PR2	HNRNPA2B1
FEN11	8.1863665794816e-41	0.443684589720389	0.395	0.184	1.24424585641541e-36	5-cone PR2	FEN1
DACT21	1.38319015224002e-40	0.475534011449479	0.355	0.152	2.10231071238961e-36	5-cone PR2	DACT2
KNL11	2.48170237991091e-40	0.447262088984836	0.31	0.125	3.77193944722659e-36	5-cone PR2	KNL1
SPC241	1.66423402875451e-39	0.424315641780951	0.403	0.192	2.52946930030397e-35	5-cone PR2	SPC24
OTX24	6.69754561174702e-39	0.272610737625564	0.995	0.748	1.01795995752943e-34	5-cone PR2	OTX2
KIF231	1.73433182304952e-38	0.403738166386045	0.271	0.102	2.63601093785296e-34	5-cone PR2	KIF23
PDZD111	2.4867279518165e-38	0.423137029441055	0.395	0.187	3.7795778139659e-34	5-cone PR2	PDZD11
ESPL11	3.33845415653253e-38	0.408993835280004	0.334	0.143	5.0741164725138e-34	5-cone PR2	ESPL1
LIMCH1	5.58906017586407e-38	0.383684660304372	0.345	0.148	8.4948125612958e-34	5-cone PR2	LIMCH1
KMT5A1	7.20711641444686e-38	0.463659339668072	0.309	0.13	1.09540962383178e-33	5-cone PR2	KMT5A
PIBPPDD4L4	1.23555861691986e-37	0.318467367007101	0.668	0.382	1.8779255418565e-33	5-cone PR2	PIBPPDD4L
HISTH11	1.70911665120373e-37	0.459424074499092	0.39	0.186	2.59768639816455e-33	5-cone PR2	HISTH1
CENPT1	1.83932040725391e-37	0.435933580577017	0.276	0.108	2.79558308698522e-33	5-cone PR2	CENPT
LOC1070498621	1.91780965043023e-37	0.520533597490701	0.395	0.195	2.9148788876889e-33	5-cone PR2	LOC107049862
UBE2S4	2.49332144378374e-37	0.410736860711814	0.57	0.323	3.7895992624069e-33	5-cone PR2	UBE2S
KIF20B1	3.65227515678169e-37	0.404725825101016	0.312	0.131	5.55109301079248e-33	5-cone PR2	KIF20B
CDKN31	3.8966665764539e-37	0.381924650318461	0.285	0.112	5.92254352955229e-33	5-cone PR2	CDKN3
NMRK24	6.77371526784807e-37	0.335905493414213	0.595	0.327	1.02953698356023e-32	5-cone PR2	NMRK2
CCDC85C1	2.4912963670281e-36	0.398503209874791	0.512	0.275	3.786521348246e-32	5-cone PR2	CCDC85C
EPHA31	2.75638272125334e-36	0.326784135610617	0.369	0.161	4.18942609803295e-32	5-cone PR2	EPHA3
HYLS11	3.76404413918946e-36	0.408975161088976	0.383	0.184	5.72097068715406e-32	5-cone PR2	HYLS1
TALDO14	6.41067163364286e-36	0.455854032975426	0.493	0.268	9.74357981597378e-32	5-cone PR2	TALDO1
TKT2	1.95499161660887e-35	0.398219049079416	0.501	0.279	2.97139175808382e-31	5-cone PR2	TKT
NPDC14	3.88054776956928e-35	0.284068172571065	0.668	0.4	5.89804455496835e-31	5-cone PR2	NPDC1
NUP503	4.02677633403422e-35	0.42709774305108	0.406	0.205	6.12029735009861e-31	5-cone PR2	NUP50
SKA24	4.58551488981041e-35	0.422294485348069	0.454	0.242	6.96952408102285e-31	5-cone PR2	SKA2
E2F81	1.09768028967605e-34	0.353232986497325	0.282	0.114	1.66836427227862e-30	5-cone PR2	E2F8
HNRNPD1	1.62424217703995e-34	0.424456499565544	0.63	0.416	2.46868568488301e-30	5-cone PR2	HNRNPD
APLP24	2.96807122920384e-34	0.382878007934276	0.423	0.211	4.51117146126692e-30	5-cone PR2	APLP2
LOC1070492571	5.1521471958919e-34	0.363545460413547	0.309	0.135	7.83074852303609e-30	5-cone PR2	LOC107049257
HP1BP33	6.31301044478868e-34	0.406391120413439	0.601	0.367	9.59514457503432e-30	5-cone PR2	HP1BP3
DUT4	8.95053879838653e-34	0.447292486120289	0.431	0.224	1.36039239196677e-29	5-cone PR2	DUT
CKAP2L1	9.83738689093101e-34	0.35055998956226	0.284	0.119	1.4951844335526e-29	5-cone PR2	CKAP2L
KIF141	1.3889809722406e-33	0.377545342353771	0.271	0.11	2.11111217970849e-29	5-cone PR2	KIF14
TNFRSF211	1.913398309265e-33	0.301636616412921	0.377	0.169	2.90817409025187e-29	5-cone PR2	TNFRSF21
ATF42	9.15216376110575e-33	0.338139895783171	0.92	0.815	1.39103737005046e-28	5-cone PR2	ATF4
USP14	1.37731548861813e-32	0.39808469978843	0.444	0.237	2.0933818111507e-28	5-cone PR2	USP1
SCG34	3.35464824414966e-32	0.276601231963377	0.489	0.252	5.09872986628307e-28	5-cone PR2	SCG3
CCSER12	4.41259902463412e-32	0.31936177347913	0.672	0.406	6.7067092575414e-28	5-cone PR2	CCSER1
TNFAIP8L11	9.67825610036476e-32	0.380642177322412	0.252	0.101	1.47099814469444e-27	5-cone PR2	TNFAIP8L1
MTPN1	1.16230123685631e-31	0.403841575646772	0.654	0.432	1.76658164989791e-27	5-cone PR2	MTPN
PCNT1	1.26918755005836e-31	0.381637674323419	0.382	0.191	1.9290381573337e-27	5-cone PR2	PCNT
FAM83D1	2.42889587452852e-31	0.366117424400233	0.267	0.112	3.69167883969589e-27	5-cone PR2	FAM83D
ARHGAP191	2.6518826360298e-31	0.358955289900071	0.273	0.116	4.0305964185017e-27	5-cone PR2	ARHGAP19
JUP	3.1925742901734e-31	0.368473645393695	0.334	0.155	4.85239366363454e-27	5-cone PR2	JUP
ANP32E2	3.27091230603409e-31	0.338159535896193	0.751	0.524	4.97145961394121e-27	5-cone PR2	ANP32E
RHOA3	3.60918433084092e-31	0.313264459015834	0.836	0.642	5.48559926444511e-27	5-cone PR2	RHOA
ENO12	6.10008876399419e-31	0.27995066602279	0.988	0.932	9.27152491239477e-27	5-cone PR2	ENO1
NCAPD31	1.23998413554422e-30	0.336349471284365	0.253	0.104	1.88465188761366e-26	5-cone PR2	NCAPD3
RAB11FIP41	1.33735469148234e-30	0.31627997975865	0.341	0.158	2.03264539558401e-26	5-cone PR2	RAB11FIP4
TFDP23	1.36222064785315e-30	0.300073470579793	0.793	0.559	2.070439162672e-26	5-cone PR2	TFDP2
REV1	2.01924508839119e-30	0.325666257836104	0.267	0.111	3.06905060984577e-26	5-cone PR2	REV1
KIF111	2.71831502121592e-30	0.348052270568279	0.286	0.127	4.13156700074607e-26	5-cone PR2	KIF11
ATAD51	3.1546384660233e-30	0.367226745964631	0.314	0.143	4.79473500450882e-26	5-cone PR2	ATAD5
CBX54	3.70960688911797e-30	0.32567239314012	0.724	0.475	5.63823151077041e-26	5-cone PR2	CBX5
TPD52L1	5.88190070834103e-30	0.367186628663587	0.275	0.117	8.93990088660753e-26	5-cone PR2	TPD52L1
C1GALT1	9.50549230159604e-30	0.352712249523778	0.259	0.108	1.44473977491958e-25	5-cone PR2	C1GALT1
KCTD3	1.41880025741818e-29	0.311600031096868	0.263	0.108	2.15643451124989e-25	5-cone PR2	KCTD3
LMNB24	1.64174941434501e-29	0.355814570965238	0.476	0.269	2.49529493486298e-25	5-cone PR2	LMNB2
ASNS	2.35182985642346e-29	0.514562914627902	0.312	0.152	3.57454619877801e-25	5-cone PR2	ASNS
WHSC14	4.01773817833967e-29	0.352035499498335	0.472	0.268	6.10656025725846e-25	5-cone PR2	WHSC1
ITGA11	3.18112645236324e-28	0.271085254885942	0.265	0.108	4.83499409494689e-24	5-cone PR2	ITGA11
SOD14	3.29756464328373e-27	0.365581783288924	0.527	0.323	5.01196850132694e-23	5-cone PR2	SOD1
SAP304	8.08179994659937e-27	0.366498058271372	0.398	0.219	1.22835277388364e-22	5-cone PR2	SAP30
XPO1	1.06784198445926e-26	0.347612776971611	0.621	0.412	1.62301303217963e-22	5-cone PR2	XPO1
C13H5orf241	1.12707177837538e-26	0.299896246721597	0.8	0.592	1.71303639595274e-22	5-cone PR2	C13H5orf24
HTRA12	1.63161942933211e-26	0.303243903156029	0.403	0.212	2.47989837064188e-22	5-cone PR2	HTRA1
LOC424401	1.7262001504894e-26	0.313452940680141	0.293	0.137	2.62365160872884e-22	5-cone PR2	LOC424401
NDRG11	2.64160755665125e-26	0.355858304110183	0.373	0.197	4.01497932535423e-22	5-cone PR2	NDRG1
MAPKAPK2	3.00872511522977e-26	0.36635726192361	0.451	0.26	4.57296130263773e-22	5-cone PR2	MAPKAPK2
TJP11	3.26710960214485e-26	0.344941257289269	0.32	0.159	4.96567988429995e-22	5-cone PR2	TJP1
TMEM135	3.96087516439228e-26	0.27161891177153	0.253	0.107	6.02013416235983e-22	5-cone PR2	TMEM135
LNPK	7.52535796132148e-26	0.313133787281625	0.259	0.117	1.14377915654125e-21	5-cone PR2	LNPK
EZH21	1.59384453081138e-25	0.317937949217561	0.345	0.178	2.42248430238021e-21	5-cone PR2	EZH2
LOC1070527632	2.608440066088e-25	0.358500591312388	0.667	0.463	3.96456805644714e-21	5-cone PR2	LOC107052763
B4GALT61	2.65064295367025e-25	0.34403106590348	0.273	0.129	4.02871222528342e-21	5-cone PR2	B4GALT6
DISP3	2.72002272389756e-25	0.299876273197986	0.253	0.111	4.1341625380519e-21	5-cone PR2	DISP3
ATP2A23	6.05693576000235e-25	0.336933307281955	0.484	0.293	9.20593666162756e-21	5-cone PR2	ATP2A2
CKS21	6.14362220722805e-25	0.27714635946697	0.359	0.186	9.33769139276592e-21	5-cone PR2	CKS2
DNAJC93	8.54824325995889e-25	0.373275559707067	0.377	0.208	1.29924749308115e-20	5-cone PR2	DNAJC9
TAF104	9.13796498720991e-25	0.289556488063492	0.695	0.489	1.38887929840603e-20	5-cone PR2	TAF10
C14orf1321	9.86943785671762e-25	0.261410609428279	0.325	0.155	1.50005585984251e-20	5-cone PR2	C14orf132
TEAD12	1.13900396682008e-24	0.334631213650465	0.415	0.235	1.73117212916984e-20	5-cone PR2	TEAD1
MAST2	1.22001477936567e-24	0.299675656022573	0.346	0.177	1.85430046315788e-20	5-cone PR2	MAST2
EZR2	1.50482816176625e-24	0.311045102117863	0.485	0.288	2.28718832306852e-20	5-cone PR2	EZR
CARMIL33	2.13885949323613e-24	0.370165095976266	0.419	0.242	3.25085254376959e-20	5-cone PR2	CARMIL3
BAZ1B2	3.42400705914009e-24	0.31690012619631	0.523	0.328	5.20414832918702e-20	5-cone PR2	BAZ1B
HSP90B13	3.52902503172186e-24	0.31814595563173	0.484	0.293	5.36376514571406e-20	5-cone PR2	HSP90B1
SEPT111	3.84442918715273e-24	0.306731333334189	0.447	0.261	5.84314792155344e-20	5-cone PR2	SEPT11
REEP5	4.67242811346338e-24	0.305569798518719	0.313	0.157	7.10162348965299e-20	5-cone PR2	REEP5
TUB1	4.86034853310352e-24	0.258658303746235	0.332	0.164	7.38724373546404e-20	5-cone PR2	TUB
LRP113	4.95249085410843e-24	0.303191261868131	0.71	0.493	7.5272908491594e-20	5-cone PR2	LRP11
NIN2	5.70755943981219e-24	0.308435211075661	0.423	0.237	8.67491959257055e-20	5-cone PR2	NIN
NUP1603	5.73017480525288e-24	0.333673564815995	0.397	0.221	8.70929268650386e-20	5-cone PR2	NUP160
CEBPG	6.87535922449682e-24	0.314707335484141	0.361	0.195	1.04498584853127e-19	5-cone PR2	CEBPG
SUMO33	7.04339268184646e-24	0.319777934897874	0.728	0.551	1.07052525371384e-19	5-cone PR2	SUMO3
KCTD201	8.20928685367812e-24	0.319682467658828	0.408	0.232	1.24772950889054e-19	5-cone PR2	KCTD20
KIAA11432	1.2698410102313e-23	0.310029764004384	0.381	0.214	1.93003135145055e-19	5-cone PR2	KIAA1143
CBX31	2.50405027434158e-23	0.291898584134256	0.743	0.543	3.80590601197176e-19	5-cone PR2	CBX3
PIGBOS11	3.62999686438197e-23	0.33286007964401	0.748	0.575	5.51723223417415e-19	5-cone PR2	PIGBOS1
CETN31	6.40668741568423e-23	0.28207011016369	0.316	0.16	9.73752420309846e-19	5-cone PR2	CETN3
ERH3	6.70009183176698e-23	0.303077756691022	0.812	0.645	1.01834695751026e-18	5-cone PR2	ERH
FOXO32	1.27326164911279e-22	0.281729295283974	0.45	0.262	1.93523038048653e-18	5-cone PR2	FOXO3
TWF11	1.84301544666945e-22	0.275125384631246	0.34	0.177	2.80119917739289e-18	5-cone PR2	TWF1
HSPD12	5.83426145695056e-22	0.309274542862646	0.438	0.262	8.86749398841916e-18	5-cone PR2	HSPD1
CLTA3	1.21843529428493e-21	0.301964717939353	0.402	0.235	1.85189980378367e-17	5-cone PR2	CLTA
ECT21	1.4426289258459e-21	0.318475411694627	0.334	0.185	2.19265170439318e-17	5-cone PR2	ECT2
MTHFD2	1.76284767244687e-21	0.337937355969381	0.302	0.16	2.679352177352e-17	5-cone PR2	MTHFD2
COBLL11	2.95594285275287e-21	0.29227505720991	0.294	0.153	4.49273754189909e-17	5-cone PR2	COBLL1
USP52	3.81781413472372e-21	0.306901966033741	0.424	0.252	5.80269570336658e-17	5-cone PR2	USP5
FAM126A1	3.98343502395169e-21	0.315092892901075	0.279	0.143	6.05442289290418e-17	5-cone PR2	FAM126A
CENPS2	1.14988093150505e-20	0.268754985205166	0.336	0.183	1.74770402779453e-16	5-cone PR2	CENPS
AHCY	1.72621485424259e-20	0.311701799430483	0.275	0.141	2.62367395696331e-16	5-cone PR2	AHCY
MTFR21	9.18459431806477e-20	0.276086134823571	0.281	0.147	1.39596649040266e-15	5-cone PR2	MTFR2
BRD8	9.95729662101601e-20	0.255658330687272	0.273	0.14	1.51340951342822e-15	5-cone PR2	BRD8
IGF2BP3	1.08647992758143e-19	0.265225165796022	0.658	0.477	1.65134084193102e-15	5-cone PR2	IGF2BP3
HNRNPU1	1.3252027658355e-19	0.27896639401686	0.771	0.602	2.01417568379338e-15	5-cone PR2	HNRNPU
CDKN2C1	1.86380610107525e-19	0.312700635993292	0.317	0.175	2.83279889302427e-15	5-cone PR2	CDKN2C
KAT73	2.03109733170204e-19	0.263566492635694	0.48	0.305	3.08706483445393e-15	5-cone PR2	KAT7
PTMS4	3.25708003318524e-19	0.253575887298403	0.782	0.599	4.95043594243825e-15	5-cone PR2	PTMS
GARS	4.55436950865098e-19	0.325347665622409	0.353	0.206	6.92218621619863e-15	5-cone PR2	GARS
ARID1B	4.71402974964307e-19	0.279294750770299	0.298	0.159	7.1648538164825e-15	5-cone PR2	ARID1B
CSE1L1	4.93536743030937e-19	0.312012606599686	0.322	0.184	7.50126495732721e-15	5-cone PR2	CSE1L
HNRNPDL	9.95627932540069e-19	0.279634147864226	0.414	0.255	1.51325489466765e-14	5-cone PR2	HNRNPDL
SFPQ	1.10734823185756e-18	0.266941027050378	0.668	0.497	1.68305857760031e-14	5-cone PR2	SFPQ
GLRX5	6.73430578173002e-18	0.265065787451412	0.503	0.339	1.02354713576514e-13	5-cone PR2	GLRX5
RBP14L	6.93668799776013e-18	0.274179137015766	0.351	0.211	1.05430720877956e-13	5-cone PR2	RBP14L
BID	8.2678152504526e-18	0.259273656460542	0.349	0.205	1.25662523991629e-13	5-cone PR2	BID
NUDT1	8.88216511356625e-18	0.28215546373266	0.34	0.198	1.35000027561093e-13	5-cone PR2	NUDT1
SMS	1.23671598029227e-17	0.273065686568844	0.267	0.143	1.87968461844622e-13	5-cone PR2	SMS
ELOVL6	1.32015306698877e-17	0.279322731876186	0.263	0.141	2.00650064651623e-13	5-cone PR2	ELOVL6
TYMS1	1.36152596596961e-17	0.265093889185014	0.317	0.18	2.06938331567721e-13	5-cone PR2	TYMS
ARID4A	1.67882168912405e-17	0.275740261979619	0.329	0.191	2.55164108529965e-13	5-cone PR2	ARID4A
FAM76B2	4.29494760955556e-17	0.251257876978521	0.363	0.214	6.5278908717635e-13	5-cone PR2	FAM76B
CMPK1	1.78928412893073e-16	0.267850737328647	0.265	0.146	2.71953294756181e-12	5-cone PR2	CMPK1
C10H15ORF58	3.68706188450408e-16	0.253796086514547	0.426	0.275	5.60396535825775e-12	5-cone PR2	C10H15ORF58
MTDH1	3.83985944083813e-16	0.255560642899634	0.573	0.403	5.83620236412988e-12	5-cone PR2	MTDH
SNRPA11	5.83475482433605e-16	0.261904094885386	0.462	0.309	8.86824385750836e-12	5-cone PR2	SNRPA1
SRSF71	2.13531534786983e-15	0.263636038649717	0.642	0.489	3.24546579722735e-11	5-cone PR2	SRSF7
C22orf39	4.49066020283706e-15	0.254242153327027	0.473	0.321	6.82535444229204e-11	5-cone PR2	C22orf39
DIAPH2	5.11199904822048e-15	0.254669459581705	0.533	0.388	7.76972735339031e-11	5-cone PR2	DIAPH2
SP32	9.0278288771406e-15	0.264030706461727	0.467	0.316	1.3721397110366e-10	5-cone PR2	SP3
NRXN3	0	2.16056892613878	0.889	0.078	0	6-HCs1	NRXN3
TFAP2A	0	2.09382147509853	0.774	0.063	0	6-HCs1	TFAP2A
PRDM131	0	1.93581397147414	0.85	0.063	0	6-HCs1	PRDM13
NRP1	0	1.83284994825182	0.721	0.019	0	6-HCs1	NRP1
ZFHX4	0	1.8143410019311	0.728	0.053	0	6-HCs1	ZFHX4
TFAP2C	0	1.36636432409957	0.547	0.017	0	6-HCs1	TFAP2C
TFAP2B	3.02594625008679e-269	1.66575449058879	0.679	0.057	4.59913570550692e-265	6-HCs1	TFAP2B
MAFB	9.69252462479321e-268	1.6789405923004	0.547	0.036	1.47316681772232e-263	6-HCs1	MAFB
GABRG2	6.31236994130715e-257	1.23003382823442	0.484	0.027	9.59417107379273e-253	6-HCs1	GABRG2
CHGB	7.04435320557942e-246	2.27021677528762	0.84	0.139	1.07067124371602e-241	6-HCs1	CHGB
FABP5	1.30946550657441e-240	1.77606641013158	0.836	0.133	1.99025662344244e-236	6-HCs1	FABP5
LOC107053525	2.60611661339739e-228	0.979958164976726	0.394	0.017	3.96103664070269e-224	6-HCs1	LOC107053525
SLIT1	8.50509118208274e-227	1.70051379740546	0.76	0.102	1.29268880876476e-222	6-HCs1	SLIT1
RUNX1T1	8.41266743007708e-219	1.66645492609519	0.808	0.133	1.27864132269742e-214	6-HCs1	RUNX1T1
PAX65	1.33089459576384e-212	1.88454967298033	0.965	0.262	2.02282669610146e-208	6-HCs1	PAX6
TMEM200B	9.89544409341475e-195	0.971272435077201	0.345	0.016	1.50400854775811e-190	6-HCs1	TMEM200B
FAIM2	4.48193454109458e-194	1.27277554137601	0.526	0.051	6.81209230900965e-190	6-HCs1	FAIM2
FGF19	2.17049798907364e-181	1.54932190389683	0.638	0.087	3.29893989359303e-177	6-HCs1	FGF19
ZFHX3	5.32716963965917e-171	1.43723855648576	0.69	0.12	8.09676513531797e-167	6-HCs1	ZFHX3
SPOCK2	2.16155192530208e-170	1.43920264273956	0.704	0.125	3.28534277126663e-166	6-HCs1	SPOCK2
GMEB26	9.15956883203168e-147	1.42296088216791	0.871	0.251	1.3921628667805e-142	6-HCs1	GMEB2
KCTD15	1.70084862266711e-144	1.11285466032151	0.456	0.054	2.58511982159174e-140	6-HCs1	KCTD15
FXYD6	5.11842801904436e-141	0.972491643106228	0.362	0.031	7.77949874614553e-137	6-HCs1	FXYD6
RASGEF1C	4.75688785416174e-134	0.740235547980335	0.279	0.017	7.22999384954043e-130	6-HCs1	RASGEF1C
LDHA5	5.40875313135836e-134	1.47770297590715	0.993	0.711	8.22076388435157e-130	6-HCs1	LDHA
STMN3	1.10799857055167e-124	0.844976197450318	0.362	0.036	1.68404702738149e-120	6-HCs1	STMN3
TMSB4Y4	1.65771642474943e-122	1.30765837718464	0.958	0.508	2.51956319397666e-118	6-HCs1	TMSB4Y
TTYH34	1.23025147805822e-105	1.16561530440247	0.746	0.231	1.86985922150069e-101	6-HCs1	TTYH3
TMSB4X5	1.4712928521844e-105	0.974778157344375	1	0.975	2.23621800603506e-101	6-HCs1	TMSB4X
SLCO5A1	2.06038305553174e-101	1.03444372109665	0.526	0.107	3.13157620610269e-97	6-HCs1	SLCO5A1
ST18	3.05328766321857e-101	1.01929768145996	0.481	0.087	4.64069191932591e-97	6-HCs1	ST18
ZNRF2	3.61654445855256e-101	1.05569495639484	0.509	0.101	5.49678592255404e-97	6-HCs1	ZNRF2
LRRC75B	5.32357634216921e-95	1.00524875102095	0.53	0.115	8.09130368246299e-91	6-HCs1	LRRC75B
MGAT4A	6.04541575115219e-94	0.888498457694067	0.397	0.063	9.18842740017622e-90	6-HCs1	MGAT4A
CABP1	1.4959869691291e-93	1.00409722450468	0.411	0.067	2.27375059437932e-89	6-HCs1	CABP1
CLMP	1.33451390633898e-92	0.899886526261703	0.394	0.063	2.02832768624461e-88	6-HCs1	CLMP
FAM110A	1.80306467240655e-92	1.15512186997135	0.467	0.09	2.74047799559072e-88	6-HCs1	FAM110A
AZIN13	1.16554732542483e-88	1.20204071369886	0.808	0.363	1.7715153799132e-84	6-HCs1	AZIN1
BARHL2	2.08841786330958e-86	0.825262927052763	0.328	0.045	3.17418631044423e-82	6-HCs1	BARHL2
INA	1.91287771146285e-82	0.708342754864607	0.261	0.029	2.90738283365238e-78	6-HCs1	INA
EPB41L24	6.67861254274063e-75	1.30291991555718	0.669	0.266	1.01508232037115e-70	6-HCs1	EPB41L2
SOX113	4.0579792046055e-74	0.968682361251176	0.878	0.515	6.1677225930799e-70	6-HCs1	SOX11
LOC112532183	4.1845251990477e-73	0.712778274451696	0.366	0.065	6.3600598500326e-69	6-HCs1	LOC112532183
PLXNA13	5.44926135143983e-73	0.932240036995903	0.746	0.305	8.28233232805339e-69	6-HCs1	PLXNA1
PLXNA23	6.22019174100239e-72	1.01735460885129	0.819	0.407	9.45406942714953e-68	6-HCs1	PLXNA2
CRYBA44	3.84915470817292e-70	0.902668042124353	0.704	0.25	5.85033024095203e-66	6-HCs1	CRYBA4
SELENOP1	1.00789596915387e-67	0.833559498460529	0.362	0.072	1.53190108351697e-63	6-HCs1	SELENOP1
PTMA1	1.63653937116078e-66	0.4640257245889	1	0.995	2.48737619022727e-62	6-HCs1	PTMA
LOC422894	1.86208127838432e-66	0.783903892906512	0.429	0.099	2.83017733501633e-62	6-HCs1	LOC422894
NME22	3.3117654930297e-64	0.495100801764145	1	0.981	5.03355237285584e-60	6-HCs1	NME2
MAB21L2	1.00563446310965e-61	0.796327493756866	0.373	0.079	1.52846382048036e-57	6-HCs1	MAB21L2
YAF23	5.89260252826456e-61	1.06353983794432	0.693	0.336	8.9561665827093e-57	6-HCs1	YAF2
PTF1A	1.44228083830862e-60	0.832667625401412	0.307	0.054	2.19212264614528e-56	6-HCs1	PTF1A
IMMP1L	2.09476169961628e-60	0.777062991612397	0.418	0.105	3.18382830724679e-56	6-HCs1	IMMP1L
FAM210B	1.00877756246934e-58	0.818822393769127	0.436	0.115	1.53324101719716e-54	6-HCs1	FAM210B
TRIM2	2.24128350022091e-58	0.662313203240544	0.303	0.056	3.40652679198576e-54	6-HCs1	TRIM2
FAM212B	1.12972262496012e-57	0.633408052306179	0.289	0.052	1.71706541767689e-53	6-HCs1	FAM212B
TMSB15B4	1.06867184780117e-54	0.681613907820409	0.906	0.556	1.624274341473e-50	6-HCs1	TMSB15B
CDK5R1	3.59005575929697e-54	0.728233439793642	0.47	0.132	5.45652574855546e-50	6-HCs1	CDK5R1
CADM2	9.02954967782685e-54	0.831178576545938	0.512	0.17	1.3724012555329e-49	6-HCs1	CADM2
VIM6	2.11143065826487e-51	0.899482990324711	0.589	0.238	3.20916345749678e-47	6-HCs1	VIM
GNG2	2.21377435262124e-51	0.771704627127457	0.477	0.145	3.36471563854902e-47	6-HCs1	GNG2
UBE2E2	1.18411724389588e-50	0.802045428375035	0.453	0.141	1.79973979899735e-46	6-HCs1	UBE2E2
SLC9A3R11	1.26184665222635e-50	0.841278992453038	0.557	0.21	1.91788072671883e-46	6-HCs1	SLC9A3R1
GCSH3	5.01819186047031e-50	0.83395686634125	0.613	0.265	7.62714980872883e-46	6-HCs1	GCSH
DYNLL1	8.88050137902455e-49	0.777828709177088	0.359	0.093	1.34974740459794e-44	6-HCs1	DYNLL1
LOC107052611	3.00780780405919e-48	0.613871754234979	0.254	0.047	4.57156708138957e-44	6-HCs1	LOC107052611
DKK3	7.21044942443978e-48	0.683090977404829	0.338	0.084	1.0959162080206e-43	6-HCs1	DKK3
PAK34	1.11380836610396e-47	0.727727509663423	0.913	0.703	1.69287733564141e-43	6-HCs1	PAK3
LHFP1	1.55268071535885e-47	0.784380330300027	0.443	0.144	2.35991941927391e-43	6-HCs1	LHFP
GPM6A2	3.06708215660643e-47	0.670398928309517	0.889	0.592	4.66165816982611e-43	6-HCs1	GPM6A
KIF21B	3.61752290275479e-46	0.673739763254966	0.387	0.108	5.49827305989701e-42	6-HCs1	KIF21B
PMEPA1	5.92320983517558e-46	0.813400020378335	0.456	0.154	9.00268662848337e-42	6-HCs1	PMEPA1
SRXN1	7.73158832741721e-45	0.73474010581231	0.334	0.086	1.17512410988414e-40	6-HCs1	SRXN1
LOC107054778	8.3320985276035e-44	0.770600928379218	0.467	0.159	1.26639565521046e-39	6-HCs1	LOC107054778
STMN25	9.36076152732202e-44	0.725108842695518	0.62	0.25	1.42274214453767e-39	6-HCs1	STMN2
KCNH71	5.34194118769319e-42	0.755378528513032	0.432	0.144	8.11921641117488e-38	6-HCs1	KCNH7
SYT4	9.52279216301692e-42	0.705438648411237	0.3	0.074	1.44736918085694e-37	6-HCs1	SYT4
BASP12	1.56021502710272e-41	0.505511125607543	0.958	0.81	2.37137081969343e-37	6-HCs1	BASP1
GAPDH	4.0147589149348e-41	0.392166841585526	0.997	0.997	6.1020320748094e-37	6-HCs1	GAPDH
CA26	6.47977421348877e-41	0.719636966403752	0.662	0.303	9.84860882708158e-37	6-HCs1	CA2
RAB3C	3.24182631883649e-39	0.672195212084607	0.279	0.069	4.92725182199958e-35	6-HCs1	RAB3C
SBK1	8.15437894998636e-39	0.623623009449607	0.328	0.092	1.23938405660843e-34	6-HCs1	SBK1
MLLT113	2.34487068362202e-38	0.680348632780861	0.666	0.334	3.5639689520371e-34	6-HCs1	MLLT11
NDEL1	4.3585237040178e-38	0.647236618449262	0.348	0.105	6.62452017773666e-34	6-HCs1	NDEL1
RPS272	5.56912032344582e-38	0.284038562863199	1	1	8.4645059796053e-34	6-HCs1	RPS27
SEPT32	1.89063539468437e-37	0.727096328801603	0.519	0.214	2.87357673638077e-33	6-HCs1	SEPT3
DAAM14	4.83023391785161e-36	0.685128082809258	0.655	0.334	7.34147253174266e-32	6-HCs1	DAAM1
SHD3	9.02393252818325e-35	0.706244533256187	0.544	0.245	1.37154750495857e-30	6-HCs1	SHD
MARCH4	2.09366059765879e-34	0.591551139234765	0.314	0.091	3.1821547423816e-30	6-HCs1	MARCH4
CHEK1	2.74990553002155e-34	0.651730637768028	0.401	0.146	4.17958141507976e-30	6-HCs1	CHEK1
SLIRP1	2.87941992099875e-34	0.620109697936611	0.864	0.673	4.376430337926e-30	6-HCs1	SLIRP
RTN1	1.73439926760492e-32	0.499370167265345	0.258	0.066	2.63611344683272e-28	6-HCs1	RTN1
TOX5	2.34906811434101e-32	0.600161871322359	0.777	0.492	3.5703486269869e-28	6-HCs1	TOX
LOC107052837	2.71590079746576e-32	0.631075394701501	0.303	0.093	4.12789762206821e-28	6-HCs1	LOC107052837
MAB21L12	3.40312801733527e-32	0.634173191630564	0.728	0.448	5.17241427354788e-28	6-HCs1	MAB21L1
RBFOX2	5.00705324668466e-32	0.561813229717434	0.348	0.115	7.61022022963602e-28	6-HCs1	RBFOX2
LOC112530080	7.6476157338211e-32	0.578112453258157	0.307	0.093	1.16236111538347e-27	6-HCs1	LOC112530080
TUBB33	2.50626693364227e-31	0.550918294907593	0.798	0.51	3.80927511244288e-27	6-HCs1	TUBB3
KCNH2	3.21671721986936e-31	0.562048415312861	0.345	0.114	4.88908850247943e-27	6-HCs1	KCNH2
CEP170B	2.27024190347667e-30	0.611268251081962	0.509	0.234	3.45054066909418e-26	6-HCs1	CEP170B
SH3BP5	2.69042123417934e-30	0.573572700084759	0.324	0.106	4.08917123382918e-26	6-HCs1	SH3BP5
AGAP13	3.65428466326476e-30	0.595137712795671	0.718	0.431	5.55414725969611e-26	6-HCs1	AGAP1
FIGNL2	1.02694985091334e-29	0.486650806707209	0.303	0.094	1.56086107840318e-25	6-HCs1	FIGNL2
COX6A11	1.15489586779172e-29	0.392666901819521	0.983	0.935	1.75532622945664e-25	6-HCs1	COX6A1
FERMT23	1.30019563879314e-29	0.634073129086159	0.61	0.332	1.9761673514017e-25	6-HCs1	FERMT2
RGS34	1.80712186317701e-29	0.897524892645711	0.603	0.344	2.74664451984273e-25	6-HCs1	RGS3
GPATCH11	2.05046970673043e-29	0.569779067643274	0.373	0.139	3.11650890725959e-25	6-HCs1	GPATCH11
FBRSL12	6.03264965281819e-29	0.659212339133543	0.53	0.261	9.16902420731837e-25	6-HCs1	FBRSL1
HSP90AB14	8.87491331802647e-29	0.593969864692991	0.756	0.5	1.34889807520684e-24	6-HCs1	HSP90AB1
CRABP12	1.46234661951556e-28	0.735892098260893	0.39	0.157	2.2226206270017e-24	6-HCs1	CRABP1
RPL111	2.18356805461277e-28	0.261759054842438	1	0.994	3.31880508620594e-24	6-HCs1	RPL11
BTG1L	3.31713832825152e-28	0.641683977456885	0.463	0.209	5.04171854510949e-24	6-HCs1	BTG1L
PHF21B	3.33831352162674e-28	0.58706898768947	0.449	0.193	5.07390272152049e-24	6-HCs1	PHF21B
CHD41	8.55302482079943e-28	0.582522734066732	0.808	0.618	1.29997424251331e-23	6-HCs1	CHD4
GPRC5B1	1.20359831264054e-27	0.610312804205195	0.397	0.155	1.82934907538236e-23	6-HCs1	GPRC5B
SOX12	1.45325689903088e-27	0.442131741901969	0.282	0.085	2.20880516083703e-23	6-HCs1	SOX12
YWHAG3	1.12524889961562e-26	0.448221328830462	0.847	0.6	1.71026580252577e-22	6-HCs1	YWHAG
KIF1A	2.51234070194708e-26	0.613072090970644	0.439	0.19	3.81850663288937e-22	6-HCs1	KIF1A
GRIPAP1	3.4647451701606e-26	0.634221487339622	0.314	0.113	5.2660661841271e-22	6-HCs1	GRIPAP1
TUBB2B3	4.09098200022839e-26	0.528782549940995	0.791	0.557	6.21788354214713e-22	6-HCs1	TUBB2B
METTL6	8.46103423919061e-26	0.585313699596507	0.265	0.086	1.28599259401458e-21	6-HCs1	METTL6
DAB2IP4	8.79046357426647e-26	0.515096199819695	0.638	0.35	1.33606255865276e-21	6-HCs1	DAB2IP
ELAVL44	1.01079567239199e-25	0.367293800724018	0.544	0.277	1.53630834246859e-21	6-HCs1	ELAVL4
CTBP22	2.13046279632691e-25	0.593232272841067	0.596	0.337	3.23809040413727e-21	6-HCs1	CTBP2
NOVA12	8.06739953732184e-25	0.558620300147734	0.463	0.221	1.22616405567755e-20	6-HCs1	NOVA1
FAM171B2	1.06067554314683e-24	0.606562717212957	0.564	0.319	1.61212075802887e-20	6-HCs1	FAM171B
ADD2	1.47048228637666e-24	0.524705019301415	0.362	0.143	2.23498602706389e-20	6-HCs1	ADD2
C14H16orf45	1.87809510169801e-24	0.574955220832122	0.373	0.154	2.8545167450708e-20	6-HCs1	C14H16orf45
FAM43A4	2.77497363752395e-24	0.618841424508285	0.502	0.256	4.21768243167266e-20	6-HCs1	FAM43A
SCG5	3.99791445838769e-24	0.460133130827133	0.282	0.097	6.07643018530344e-20	6-HCs1	SCG5
CSDC2	6.69157912946805e-24	0.447446007113401	0.258	0.082	1.01705311188785e-19	6-HCs1	CSDC2
LOC107051649	7.66284054619525e-24	0.533784444598501	0.317	0.118	1.16467513461622e-19	6-HCs1	LOC107051649
ENY21	2.77936904504307e-23	0.567831958865281	0.624	0.409	4.22436301156096e-19	6-HCs1	ENY2
LOC107053920	3.07778632851481e-23	0.503047006030676	0.261	0.086	4.67792744070966e-19	6-HCs1	LOC107053920
NR6A1	3.11968463766497e-23	0.586093243657293	0.436	0.205	4.74160868078699e-19	6-HCs1	NR6A1
SSBP31	6.26344447818278e-23	0.501290266570493	0.77	0.578	9.51980926239e-19	6-HCs1	SSBP3
OAZ11	7.82613167644663e-23	0.352667037743748	0.965	0.889	1.18949375350312e-18	6-HCs1	OAZ1
SMUG1	8.25250928254013e-23	0.479949778149973	0.321	0.123	1.25429888585327e-18	6-HCs1	SMUG1
SAMD12	1.15721192735297e-22	0.480336933653674	0.279	0.099	1.75884640838378e-18	6-HCs1	SAMD12
KDM5B3	2.59091703694815e-22	0.466663013012218	0.652	0.389	3.93793480445749e-18	6-HCs1	KDM5B
NDUFB101	4.31066189375316e-22	0.481611033287808	0.714	0.507	6.55177501231543e-18	6-HCs1	NDUFB10
MSANTD4	1.2284736054067e-21	0.534817441636898	0.341	0.144	1.86715703285765e-17	6-HCs1	MSANTD4
KLC1	1.23180936337237e-21	0.512979764612057	0.436	0.207	1.87222705138966e-17	6-HCs1	KLC1
CRMP13	2.04288988562541e-21	0.539236127567636	0.547	0.318	3.10498833716206e-17	6-HCs1	CRMP1
RNASEK1	3.72117412875515e-21	0.425244164527429	0.847	0.705	5.65581255829495e-17	6-HCs1	RNASEK
SARS2	4.04302317530902e-21	0.546690036892471	0.666	0.466	6.14499092415218e-17	6-HCs1	SARS
PHC23	8.05596722094883e-20	0.477360071234956	0.686	0.486	1.22442645791201e-15	6-HCs1	PHC2
FYN	9.55429907803157e-20	0.537528584679632	0.373	0.175	1.45215791687002e-15	6-HCs1	FYN
COPS93	2.97224950590989e-19	0.387217287500184	0.885	0.762	4.51752202403245e-15	6-HCs1	COPS9
NDUFB91	4.8431770586652e-19	0.477851396980918	0.589	0.369	7.36114481146524e-15	6-HCs1	NDUFB9
LOC101748032	4.89047908186748e-19	0.460171144602019	0.275	0.107	7.43303915653038e-15	6-HCs1	LOC101748032
FEZ1	7.09352683725038e-19	0.469825093874988	0.314	0.134	1.07814514399369e-14	6-HCs1	FEZ1
TNIK1	9.32365286752866e-19	0.499030425435326	0.359	0.169	1.41710199933568e-14	6-HCs1	TNIK
PPIA	2.41917084916934e-18	0.303011793829028	0.979	0.965	3.67689777365247e-14	6-HCs1	PPIA
FAM89A	3.24589652715751e-18	0.523454976244487	0.436	0.234	4.93343813162669e-14	6-HCs1	FAM89A
NKAIN41	3.38727385497821e-18	0.455699607290794	0.282	0.114	5.14831753218138e-14	6-HCs1	NKAIN4
SSBP4	2.28520553759739e-17	0.510153919438677	0.286	0.122	3.47328389659427e-13	6-HCs1	SSBP4
RTN2	2.70417902963356e-17	0.441897375274332	0.418	0.21	4.11008170714004e-13	6-HCs1	RTN2
DNMT3A4	4.01178063283772e-17	0.454011302104804	0.683	0.486	6.09750538385006e-13	6-HCs1	DNMT3A
EVL4	4.53323225154927e-17	0.440058733759812	0.488	0.269	6.89005969912973e-13	6-HCs1	EVL
MAPK61	4.87222980395177e-17	0.393899421733656	0.822	0.695	7.4053020790263e-13	6-HCs1	MAPK6
NAV14	6.28960498083031e-17	0.473835293536499	0.436	0.232	9.55957061036399e-13	6-HCs1	NAV1
LOC1070523891	6.62818387120292e-17	0.354116707759236	0.784	0.612	1.00741766658413e-12	6-HCs1	LOC107052389
NFIL3	4.86966579252659e-16	0.431182249759887	0.314	0.145	7.40140503806117e-12	6-HCs1	NFIL3
SLC2A14	7.49710987009946e-16	0.395122075482471	0.54	0.322	1.13948572915642e-11	6-HCs1	SLC2A1
HDGFRP31	2.71629717819397e-15	0.468185751227219	0.397	0.218	4.12850008113702e-11	6-HCs1	HDGFRP3
HIST1H2B7L2	4.35922904649271e-15	0.420444197073212	0.272	0.117	6.62559222776427e-11	6-HCs1	HIST1H2B7L2
LOC107053182	4.46373902830444e-15	0.454158728438496	0.404	0.222	6.78443694911991e-11	6-HCs1	LOC107053182
RHOF	4.49048512542034e-15	0.491305229197098	0.411	0.233	6.82508834212637e-11	6-HCs1	RHOF
DPYSL4	8.65388645091964e-15	0.385370084887727	0.272	0.117	1.31530420167528e-10	6-HCs1	DPYSL4
NETO2	1.04667222319232e-14	0.373480254155953	0.362	0.183	1.59083711203e-10	6-HCs1	NETO2
EPHB21	1.37053775971337e-14	0.535610318682042	0.279	0.128	2.08308034098835e-10	6-HCs1	EPHB2
SRSF53	1.61515387294346e-14	0.423617610037563	0.509	0.318	2.45487237148676e-10	6-HCs1	SRSF5
KIRREL3	1.78191860513839e-14	0.464605822589605	0.265	0.118	2.70833808794984e-10	6-HCs1	KIRREL3
DYNC1I12	1.86951341542346e-14	0.48004563717893	0.411	0.229	2.84147344010211e-10	6-HCs1	DYNC1I1
TMEM9B2	1.87833868467233e-14	0.437571933668668	0.551	0.366	2.85488696683347e-10	6-HCs1	TMEM9B
POU2F14	2.81855999763395e-14	0.467828369365105	0.502	0.316	4.28392934040385e-10	6-HCs1	POU2F1
NDUFA12	2.81877662457152e-14	0.562101495969613	0.491	0.321	4.28425859168625e-10	6-HCs1	NDUFA12
PCBP34	8.38119246053687e-14	0.290828823144979	0.721	0.498	1.273857442077e-09	6-HCs1	PCBP3
CTBP11	1.01647831293784e-13	0.403453225053535	0.596	0.414	1.54494538783422e-09	6-HCs1	CTBP1
ACTL6B2	1.92861312917326e-13	0.392691800116644	0.401	0.221	2.93129909503044e-09	6-HCs1	ACTL6B
OSBPL21	1.95770754842213e-13	0.448414762513488	0.258	0.118	2.9755197028468e-09	6-HCs1	OSBPL2
SKIDA1	2.5377581613876e-13	0.432297918102226	0.334	0.173	3.85713862949301e-09	6-HCs1	SKIDA1
GPR274	9.31264280397247e-13	0.465825065295061	0.425	0.256	1.41542857977578e-08	6-HCs1	GPR27
PTPRG1	1.4492184565511e-12	0.425094808720582	0.286	0.142	2.20266713211201e-08	6-HCs1	PTPRG
DUSP14	1.71486202275513e-12	0.42972870148499	0.324	0.172	2.60641878838552e-08	6-HCs1	DUSP14
GPM6B3	2.02370150941886e-12	0.39887352441126	0.693	0.557	3.07582392416573e-08	6-HCs1	GPM6B
UBB2	2.7319445398078e-12	0.268503839254163	0.916	0.852	4.15228250605388e-08	6-HCs1	UBB
GALNT13	2.91996122896639e-12	0.46214837519999	0.415	0.265	4.43804907190601e-08	6-HCs1	GALNT1
FKBP1C4	3.00614453887443e-12	0.275363565279826	0.902	0.82	4.56903908463525e-08	6-HCs1	FKBP1C
XPR11	4.47997435159866e-12	0.402294484436063	0.39	0.232	6.8091130169948e-08	6-HCs1	XPR1
DDX5	7.15083871646226e-12	0.283059964621054	0.913	0.869	1.0868559765151e-07	6-HCs1	DDX5
MYT13	8.00699788400609e-12	0.268618701776233	0.777	0.585	1.21698360839009e-07	6-HCs1	MYT1
SKI	8.21398324755777e-12	0.376088338366711	0.258	0.122	1.24844331379631e-07	6-HCs1	SKI
LRCH2	9.82625865807091e-12	0.35903486159838	0.334	0.181	1.4934930534402e-07	6-HCs1	LRCH2
NAV21	1.00546986760585e-11	0.445762356995189	0.261	0.131	1.52821365177413e-07	6-HCs1	NAV2
UQCC31	1.32684783320181e-11	0.304025594298336	0.711	0.568	2.01667602168344e-07	6-HCs1	UQCC3
CALM11	1.40490385432985e-11	0.312588498307907	0.871	0.798	2.13531336819593e-07	6-HCs1	CALM1
PFDN4	1.45323707828392e-11	0.382641739196991	0.606	0.446	2.20877503528373e-07	6-HCs1	PFDN4
TPCN1	1.58615889377473e-11	0.395366157656948	0.355	0.203	2.41080290264821e-07	6-HCs1	TPCN1
DUSP23	1.91352167741468e-11	0.34394432196529	0.352	0.197	2.90836159750257e-07	6-HCs1	DUSP23
KIAA05131	2.30004046607246e-11	0.400180778501921	0.341	0.187	3.49583150438354e-07	6-HCs1	KIAA0513
SIRT6	2.39680653397314e-11	0.359336888249642	0.334	0.183	3.64290625098578e-07	6-HCs1	SIRT6
CENPX1	2.69860867186913e-11	0.405889733441498	0.376	0.226	4.1016153203739e-07	6-HCs1	CENPX
TUBB2A	3.01849310347928e-11	0.443919190186209	0.289	0.157	4.58780766797815e-07	6-HCs1	TUBB2A
LOC7683922	5.27695605330165e-11	0.568178036407177	0.352	0.205	8.02044550541318e-07	6-HCs1	LOC768392
ZNF644	7.50085243481495e-11	0.384393432196769	0.592	0.45	1.14005456156752e-06	6-HCs1	ZNF644
MEX3A1	8.13340316185668e-11	0.26985130923314	0.889	0.797	1.2361959465706e-06	6-HCs1	MEX3A
CCND11	9.58709866970538e-11	0.332698229602554	0.345	0.19	1.45714312680852e-06	6-HCs1	CCND1
NCOR1	1.06872816170552e-10	0.41236675579215	0.317	0.179	1.62435993297622e-06	6-HCs1	NCOR1
TIMM104	1.43334836938588e-10	0.26246555142311	0.512	0.343	2.17854618662959e-06	6-HCs1	TIMM10
HIC21	1.76294006343832e-10	0.322030865374078	0.505	0.332	2.6794926024199e-06	6-HCs1	HIC2
CORO1C	2.1917018855102e-10	0.407598644802181	0.317	0.178	3.33116769578695e-06	6-HCs1	CORO1C
PHF141	2.72253752000515e-10	0.37749971342776	0.561	0.422	4.13798477665582e-06	6-HCs1	PHF14
APP4	2.87973165317625e-10	0.319692958692449	0.582	0.42	4.37690413966258e-06	6-HCs1	APP
ONECUT1	3.46551060252619e-10	0.347600925048632	0.376	0.225	5.26722956477955e-06	6-HCs1	ONECUT1
GALNT7	3.49617130596753e-10	0.364450552857355	0.272	0.144	5.31383076794004e-06	6-HCs1	GALNT7
RAB6A3	4.83289005873545e-10	0.251586311382017	0.784	0.653	7.34550960027201e-06	6-HCs1	RAB6A
GST2L1	4.83801698165627e-10	0.364702037298829	0.589	0.445	7.35330201041936e-06	6-HCs1	GST2L
TMEFF1	5.37290401531118e-10	0.307370597643463	0.369	0.215	8.16627681287146e-06	6-HCs1	TMEFF1
JARID21	5.54061787012232e-10	0.357018348159198	0.279	0.148	8.42118510079891e-06	6-HCs1	JARID2
NSG13	6.07357300221601e-10	0.334157425577998	0.39	0.238	9.23122360606811e-06	6-HCs1	NSG1
NOP21	6.86122128256723e-10	0.369865286826697	0.516	0.379	1.04283702273739e-05	6-HCs1	NOP2
PNISR1	8.0634558217894e-10	0.352653068035009	0.589	0.448	1.22556465035377e-05	6-HCs1	PNISR
FAM117B	8.3481283413694e-10	0.344258288430444	0.321	0.186	1.26883202660474e-05	6-HCs1	FAM117B
SPIN1Z2	8.94212681988318e-10	0.320756803106485	0.422	0.266	1.35911385535404e-05	6-HCs1	SPIN1Z
ILF2	9.05709038710439e-10	0.297689384253932	0.725	0.602	1.376587167936e-05	6-HCs1	ILF2
MAP1B3	1.30547292699388e-09	0.327879919756474	0.613	0.46	1.984188301738e-05	6-HCs1	MAP1B
OLFM1	1.37917046428816e-09	0.305970314873616	0.31	0.168	2.09620118867158e-05	6-HCs1	OLFM1
NCS1	2.64504588926486e-09	0.331955480848489	0.352	0.21	4.02020524709366e-05	6-HCs1	NCS1
CELSR3	3.76812359681574e-09	0.35653200351301	0.289	0.162	5.72717105480024e-05	6-HCs1	CELSR3
ACAP3	4.24521403846122e-09	0.331446297127879	0.293	0.167	6.4523008170572e-05	6-HCs1	ACAP3
LAPTM4B	5.65370898099054e-09	0.307063014650574	0.258	0.134	8.59307228020753e-05	6-HCs1	LAPTM4B
ARHGAP321	6.23124826880315e-09	0.335139632971226	0.254	0.14	9.47087424375391e-05	6-HCs1	ARHGAP32
TRIO	7.34734305085646e-09	0.329903068907839	0.324	0.193	0.000111672267029967	6-HCs1	TRIO
RTN42	9.19813436320061e-09	0.284244013567275	0.732	0.589	0.000139802444186286	6-HCs1	RTN4
KCNAB2	1.1530426803936e-08	0.303533561646206	0.331	0.197	0.000175250956993024	6-HCs1	KCNAB2
RFX7	1.28896299866204e-08	0.357905300917933	0.289	0.17	0.000195909486166643	6-HCs1	RFX7
NDUFB4	1.43178605662744e-08	0.291005168962086	0.676	0.564	0.000217617162746805	6-HCs1	NDUFB4
CDON	1.48188321735358e-08	0.35933971080741	0.251	0.137	0.000225231430205571	6-HCs1	CDON
PBX14	1.57854678291731e-08	0.319136816841642	0.634	0.49	0.000239923325535602	6-HCs1	PBX1
EIF51	1.84882705580418e-08	0.337789651560755	0.714	0.613	0.000281003224211677	6-HCs1	EIF5
ZNF532	2.02036649413245e-08	0.3159457587814	0.314	0.184	0.000307075503443191	6-HCs1	ZNF532
GTF2A2	2.20941487869049e-08	0.324555270454467	0.509	0.383	0.000335808967412168	6-HCs1	GTF2A2
SSR2	2.26745452090788e-08	0.311755665442127	0.554	0.429	0.000344630412632789	6-HCs1	SSR2
CELSR21	2.46102947962594e-08	0.323290679122611	0.334	0.203	0.000374051870608346	6-HCs1	CELSR2
MED13L2	2.53427854006294e-08	0.333014526897098	0.366	0.235	0.000385184995304166	6-HCs1	MED13L
PPP3CA	2.89257818145918e-08	0.317364075499113	0.31	0.187	0.000439642957799981	6-HCs1	PPP3CA
FRMD4A1	3.32673393547222e-08	0.340506012449575	0.296	0.174	0.000505630290852423	6-HCs1	FRMD4A
PIN42	3.54793978764489e-08	0.289615158984343	0.523	0.375	0.000539251368324146	6-HCs1	PIN4
GPR85	3.55024932108714e-08	0.36537930587439	0.341	0.217	0.000539602394312034	6-HCs1	GPR85
LOC1125315752	3.60279887667176e-08	0.328853222115894	0.443	0.307	0.000547589401265341	6-HCs1	LOC112531575
HMX11	3.69107162126703e-08	0.31147980846942	0.387	0.259	0.000561005975716376	6-HCs1	HMX1
MDK1	3.92684756858918e-08	0.28900897578572	0.321	0.19	0.00059684156194987	6-HCs1	MDK
QPRT	4.25389173361767e-08	0.333927455034273	0.258	0.145	0.00064654900459255	6-HCs1	QPRT
HDAC2	6.90432183187195e-08	0.28335684066477	0.62	0.479	0.00104938787522622	6-HCs1	HDAC2
LOC112532890	8.89777299461022e-08	0.310325799608943	0.373	0.251	0.00135237251745081	6-HCs1	LOC112532890
BAHCC11	9.66399181939632e-08	0.270506048265949	0.453	0.318	0.00146883011663005	6-HCs1	BAHCC1
PCDHGC31	1.04015243341642e-07	0.278105984943944	0.345	0.214	0.00158092768354962	6-HCs1	PCDHGC3
KIDINS2202	1.39646604566424e-07	0.358155863621904	0.429	0.298	0.00212248874280507	6-HCs1	KIDINS220
GPX35	1.69366332587993e-07	0.252559890927605	0.516	0.368	0.00257419888900491	6-HCs1	GPX3
POP5	1.70090078714667e-07	0.307060262425242	0.321	0.203	0.00258519910638422	6-HCs1	POP5
MRPS14	1.80509773696501e-07	0.305873175072584	0.261	0.155	0.00274356805041311	6-HCs1	MRPS14
HRAS5	2.59794612993966e-07	0.33601277950963	0.544	0.437	0.00394861832289529	6-HCs1	HRAS
TIA1	2.82107557604593e-07	0.253454055352366	0.624	0.511	0.0042877527680322	6-HCs1	TIA1
RBX1	2.93695607414297e-07	0.287385269059604	0.519	0.4	0.00446387953708989	6-HCs1	RBX1
NDUFS4	3.41159462691864e-07	0.355710976948349	0.359	0.251	0.00518528267345364	6-HCs1	NDUFS4
MAF11	3.74326719100515e-07	0.265383036089591	0.491	0.365	0.00568939180360873	6-HCs1	MAF1
NRXN11	4.49505524913229e-07	0.250830172098303	0.307	0.184	0.00683203447315616	6-HCs1	NRXN1
EFNB14	5.41002081360668e-07	0.34491319996997	0.362	0.241	0.0082226906346008	6-HCs1	EFNB1
PALD14	5.65789384547394e-07	0.277605935429087	0.369	0.25	0.00859943285573583	6-HCs1	PALD1
DCLK23	5.73699018842256e-07	0.252228794101351	0.446	0.322	0.00871965138738346	6-HCs1	DCLK2
ABRACL	6.67846205108872e-07	0.297250072090883	0.307	0.196	0.0101505944714497	6-HCs1	ABRACL
MRPL30	8.09574637064989e-07	0.345291366499564	0.328	0.221	0.0123047249087508	6-HCs1	MRPL30
TSG101	8.91455638424301e-07	0.32118560222837	0.387	0.269	0.0135492342484109	6-HCs1	TSG101
COMMD1	1.32683733424651e-06	0.322957568465487	0.272	0.173	0.0201666006432127	6-HCs1	COMMD1
KLHL354	1.84037268005862e-06	0.252905236125523	0.456	0.331	0.0279718243642109	6-HCs1	KLHL35
MEX3B3	2.11339830686366e-06	0.27934446317181	0.557	0.434	0.0321215408660208	6-HCs1	MEX3B
WBP11	2.30090454806859e-06	0.265217521524703	0.648	0.556	0.0349714482260946	6-HCs1	WBP1
LOC101750502	3.08745350867031e-06	0.287623202365239	0.251	0.151	0.04692620587828	6-HCs1	LOC101750502
NTMT1	3.52990972635039e-06	0.250953788674134	0.296	0.193	0.0536510979307996	6-HCs1	NTMT1
OGFR	8.2842152077775e-06	0.279265521938633	0.265	0.17	0.12591178694301	6-HCs1	OGFR
VAPB1	9.82310332901656e-06	0.27322710928036	0.467	0.376	0.149301347497723	6-HCs1	VAPB
NT5DC2	1.21568585388606e-05	0.289676257417515	0.258	0.168	0.184772092932143	6-HCs1	NT5DC2
HIKESHI	1.24057234823141e-05	0.283065679700993	0.449	0.356	0.188554591207693	6-HCs1	HIKESHI
SRA1	1.49558359578687e-05	0.257136769379256	0.331	0.228	0.227313750723646	6-HCs1	SRA1
TXN	1.69613459989026e-05	0.282669631643372	0.613	0.53	0.257795497837321	6-HCs1	TXN
ATP6V0B	2.155833891411e-05	0.251567268737029	0.296	0.201	0.327665193155558	6-HCs1	ATP6V0B
SUMO1	3.32152882540078e-05	0.253937770421312	0.495	0.408	0.504839166172664	6-HCs1	SUMO1
RPN11	3.93504106802323e-05	0.262580300283606	0.415	0.325	0.59808689192885	6-HCs1	RPN1
FAM204A	7.50837259867129e-05	0.26358120206933	0.293	0.206	1	6-HCs1	FAM204A
HSPB11	0.000117920051624284	0.296215973567829	0.268	0.189	1	6-HCs1	HSPB11
ERNI4	0.000186101714997036	0.268035977816254	0.369	0.279	1	6-HCs1	ERNI
KMT2C	0.000285176500882949	0.25467985707361	0.439	0.368	1	6-HCs1	KMT2C
RSL24D1	0.000707879799274094	0.264299140511383	0.404	0.332	1	6-HCs1	RSL24D1
FAM96B	0.00116279315575481	0.251708071676553	0.338	0.274	1	6-HCs1	FAM96B
TFAP2B1	0	2.61009122384794	0.966	0.05	0	7-HCs2	TFAP2B
TFAP2A1	0	2.45738674969577	0.948	0.063	0	7-HCs2	TFAP2A
ONECUT3	0	2.06997212521495	0.76	0.035	0	7-HCs2	ONECUT3
SEZ6L	0	1.77573803670035	0.781	0.026	0	7-HCs2	SEZ6L
PLK2	0	1.63384182829445	0.678	0.021	0	7-HCs2	PLK2
TFAP2E	0	1.22299532479544	0.356	0.003	0	7-HCs2	TFAP2E
CHRNB3	0	1.15349555772341	0.395	0.006	0	7-HCs2	CHRNB3
LOC107053180	1.90003911967947e-282	1.12912743985656	0.408	0.01	2.88786945800083e-278	7-HCs2	LOC107053180
LSAMP	2.49679503499944e-275	1.66251584867239	0.584	0.035	3.79487877369565e-271	7-HCs2	LSAMP
CNKSR2L	5.52286225436986e-252	0.80026077363949	0.262	0.001	8.39419834041675e-248	7-HCs2	CNKSR2L
OXT	3.66318496238478e-251	1.30967346112226	0.275	0.002	5.56767482432863e-247	7-HCs2	OXT
GRIA3	3.05945339123042e-247	1.14747976769099	0.425	0.016	4.65006320933111e-243	7-HCs2	GRIA3
MEGF10	1.78296794579534e-241	1.32128853958571	0.524	0.031	2.70993298081434e-237	7-HCs2	MEGF10
SLC32A1	8.28751887584305e-241	1.06675050106164	0.412	0.015	1.25961999393939e-236	7-HCs2	SLC32A1
SLIT11	1.02579854417687e-233	1.85517299862468	0.837	0.105	1.55911120729442e-229	7-HCs2	SLIT1
GRIA4	3.21811571680796e-219	0.95772932339221	0.33	0.009	4.89121407797642e-215	7-HCs2	GRIA4
LHX1	1.99993590874418e-217	2.09611328366556	0.472	0.028	3.03970258770028e-213	7-HCs2	LHX1
LOC112530064	3.04643479834598e-216	1.44508379321847	0.318	0.008	4.63027625000605e-212	7-HCs2	LOC112530064
SOX3	8.88689529720859e-211	1.12472689989518	0.352	0.012	1.35071921622273e-206	7-HCs2	SOX3
GRIN2A	2.05748126954373e-208	1.20582921838563	0.498	0.033	3.12716578157952e-204	7-HCs2	GRIN2A
ISL1	1.08510289554946e-204	2.01768016413747	0.464	0.029	1.64924789094562e-200	7-HCs2	ISL1
LOC1070526111	1.37681857203596e-196	1.10816734167342	0.506	0.038	2.09262654763745e-192	7-HCs2	LOC107052611
PLXNC1	1.1565936602265e-194	0.745296432699819	0.253	0.005	1.75790670417826e-190	7-HCs2	PLXNC1
C23H1orf216	2.08158878211981e-193	1.09489767321422	0.455	0.029	3.1638067899439e-189	7-HCs2	C23H1orf216
ATP8B3	1.3795078556545e-188	0.91772002914372	0.322	0.012	2.09671398980927e-184	7-HCs2	ATP8B3
FXYD61	1.30232177909137e-182	1.22205960294928	0.446	0.03	1.97939887204097e-178	7-HCs2	FXYD6
SHH	3.42715837672344e-181	1.06710591250758	0.382	0.021	5.20893801678195e-177	7-HCs2	SHH
CDK5R11	4.32224536933583e-174	1.52807171969732	0.764	0.122	6.56938073685353e-170	7-HCs2	CDK5R1
CACNG2	1.53436688668774e-167	0.744308054804187	0.322	0.014	2.33208423107669e-163	7-HCs2	CACNG2
KLC11	1.25366695570835e-153	1.57877048606157	0.841	0.19	1.90544840598112e-149	7-HCs2	KLC1
EEF1A2	2.64181991728552e-153	1.49203970452175	0.567	0.07	4.01530209228227e-149	7-HCs2	EEF1A2
FGF191	3.77255728827528e-153	1.68518339907065	0.639	0.093	5.7339098224496e-149	7-HCs2	FGF19
ONECUT11	1.99918122717106e-148	1.78575999360358	0.833	0.205	3.03855554717729e-144	7-HCs2	ONECUT1
FAIM21	1.81268450062677e-144	1.16270738317426	0.511	0.057	2.75509917250262e-140	7-HCs2	FAIM2
PROX11	1.59025719922207e-139	1.65828499721057	0.588	0.089	2.41703191709762e-135	7-HCs2	PROX1
FAM110A1	4.51686578171646e-132	1.46163088905413	0.584	0.089	6.86518430163085e-128	7-HCs2	FAM110A
EPB41L25	2.88713713755788e-128	1.42186978767356	0.884	0.26	4.38815973537423e-124	7-HCs2	EPB41L2
BARHL21	2.49323629673061e-124	1.1598233191189	0.416	0.043	3.78946984740086e-120	7-HCs2	BARHL2
TMSB4Y5	3.56283620144692e-121	1.57573947691086	0.983	0.512	5.41515474257917e-117	7-HCs2	TMSB4Y
ONECUT23	7.41437469424332e-117	2.1903240649723	0.858	0.321	1.12691080977804e-112	7-HCs2	ONECUT2
RUNX1T11	3.63206623951958e-116	1.18523512026459	0.708	0.146	5.52037747744581e-112	7-HCs2	RUNX1T1
SRXN11	1.99896914216705e-112	1.04790974828862	0.519	0.08	3.0382331991797e-108	7-HCs2	SRXN1
NDRG44	3.82133968511961e-111	1.89769968832885	0.777	0.23	5.8080541874133e-107	7-HCs2	NDRG4
PDE4D	2.45644713243097e-108	0.873905812940473	0.326	0.029	3.73355399658183e-104	7-HCs2	PDE4D
GAPDH1	4.72610638135716e-107	0.854090437985842	1	0.997	7.18320908902475e-103	7-HCs2	GAPDH
DAAM15	3.56642304104678e-102	1.24552539267208	0.897	0.326	5.420606380087e-98	7-HCs2	DAAM1
PRDM132	3.67413511125818e-100	0.954312304974583	0.536	0.087	5.5843179556013e-96	7-HCs2	PRDM13
GMEB27	1.45751837239232e-98	1.10456458543479	0.841	0.259	2.21528217419908e-94	7-HCs2	GMEB2
TMSB4X6	1.02607776625749e-96	1.1834271132293	1	0.975	1.55953559693476e-92	7-HCs2	TMSB4X
TENM1	2.08936464144925e-94	0.743456307460664	0.326	0.034	3.17562531853872e-90	7-HCs2	TENM1
MTSS12	2.41903716036333e-94	1.23323578822449	0.721	0.198	3.67669458003622e-90	7-HCs2	MTSS1
CLMP1	3.3867332699594e-90	0.912330481617828	0.429	0.065	5.14749589701129e-86	7-HCs2	CLMP
PCDH7	6.07338675183314e-90	0.735790497475787	0.292	0.028	9.23094052411119e-86	7-HCs2	PCDH7
SHD4	6.1479784158292e-90	1.16899085495524	0.764	0.238	9.34431239421881e-86	7-HCs2	SHD
PCBP35	9.81916245393849e-90	1.33132698882978	0.914	0.491	1.49241450137411e-85	7-HCs2	PCBP3
PAX66	1.32340837964165e-89	1.16943949621128	0.837	0.276	2.01144839621735e-85	7-HCs2	PAX6
PLXNA24	3.35613216590298e-89	1.27028204488714	0.897	0.408	5.10098527895593e-85	7-HCs2	PLXNA2
COX6A12	9.17558824119567e-88	0.966863903759372	0.996	0.935	1.39459765677933e-83	7-HCs2	COX6A1
SLC25A22	3.3806697431361e-85	0.676906082770331	0.27	0.026	5.13827994259255e-81	7-HCs2	SLC25A22
PCDH9	5.56712448487542e-85	0.844388535995785	0.292	0.031	8.46147250456215e-81	7-HCs2	PCDH9
STMN26	1.04665882343623e-83	1.03793477354662	0.794	0.245	1.59081674574073e-79	7-HCs2	STMN2
NCKAP5	2.90700699012914e-81	0.988281721048245	0.455	0.083	4.41835992429729e-77	7-HCs2	NCKAP5
CCND12	4.11792178378738e-81	1.36926530403952	0.631	0.178	6.25882931917844e-77	7-HCs2	CCND1
ELMO1	4.96689401244381e-81	0.882366720462805	0.429	0.073	7.54918220951334e-77	7-HCs2	ELMO1
TRIM21	1.57253957897908e-80	0.828798844434957	0.378	0.055	2.39010290609031e-76	7-HCs2	TRIM2
YAF24	3.25462524188357e-80	1.15339252047641	0.815	0.334	4.94670490513884e-76	7-HCs2	YAF2
KCTD151	2.97785725323348e-79	0.834616910530259	0.395	0.061	4.52604523918956e-75	7-HCs2	KCTD15
GNG21	1.26365374386566e-78	0.867303217840677	0.609	0.143	1.92062732530142e-74	7-HCs2	GNG2
NAV15	1.08876029820667e-76	0.999586966807768	0.712	0.221	1.65480677724431e-72	7-HCs2	NAV1
ZFHX31	1.59096869106889e-76	1.23353637768418	0.549	0.133	2.41811331355561e-72	7-HCs2	ZFHX3
MYT1L	5.38377659058921e-75	0.655412272995923	0.27	0.03	8.18280204003654e-71	7-HCs2	MYT1L
RAB6A4	6.319012551396e-73	0.958199375139541	0.957	0.646	9.60426717686678e-69	7-HCs2	RAB6A
KIF1A1	1.3303562247862e-71	0.975654606117527	0.639	0.183	2.02200842605254e-67	7-HCs2	KIF1A
GABRG21	2.26408793891296e-70	0.675973181836533	0.305	0.04	3.44118725835381e-66	7-HCs2	GABRG2
RBFOX21	2.56594832932528e-70	0.879530707824761	0.494	0.111	3.8999848657415e-66	7-HCs2	RBFOX2
SPOCK21	2.73795469995649e-70	0.942281411281381	0.567	0.138	4.16141734846387e-66	7-HCs2	SPOCK2
DYNLL11	3.70264754658426e-70	0.987308560714051	0.451	0.092	5.62765400605342e-66	7-HCs2	DYNLL1
LOC107050595	8.05813052582885e-70	1.04137064341017	0.618	0.177	1.22475525862073e-65	7-HCs2	LOC107050595
FBRSL13	9.2232565750626e-67	0.991806944707567	0.712	0.255	1.40184276684376e-62	7-HCs2	FBRSL1
PPP1R13B	2.41362871017528e-66	0.822795267982151	0.365	0.063	3.66847427659541e-62	7-HCs2	PPP1R13B
MAB21L21	5.47133563811424e-66	0.863419855050104	0.416	0.08	8.31588303636984e-62	7-HCs2	MAB21L2
LOC101750610	3.88662437866605e-64	0.604236861779829	0.258	0.032	5.90728039313453e-60	7-HCs2	LOC101750610
LRRC4C	9.90958329741098e-64	0.72201711520749	0.279	0.038	1.50615756537349e-59	7-HCs2	LRRC4C
KLHL9	1.87703058426036e-63	1.00894352653738	0.429	0.093	2.85289878501732e-59	7-HCs2	KLHL9
ARHGEF12	2.13220896474096e-62	0.815743582918859	0.395	0.078	3.24074440550979e-58	7-HCs2	ARHGEF12
RUSC2	5.0197571352789e-61	0.672927879478869	0.27	0.037	7.6295288699104e-57	7-HCs2	RUSC2
PPDPF1	2.00602326032827e-59	0.926277476859002	0.446	0.106	3.04895475337293e-55	7-HCs2	PPDPF
FABP51	5.48882419327352e-58	0.846704519296704	0.558	0.154	8.34246389135643e-54	7-HCs2	FABP5
TMTC2	1.27669435055165e-55	0.776703430277606	0.326	0.06	1.94044774340346e-51	7-HCs2	TMTC2
NRXN31	1.99832254930351e-54	0.787713876923208	0.459	0.108	3.03725044268641e-50	7-HCs2	NRXN3
CPLX2	6.00400096270798e-54	0.996970102564788	0.446	0.113	9.12548106321985e-50	7-HCs2	CPLX2
OPTC1	8.0329597997408e-54	0.745332783673092	0.283	0.046	1.2209295599626e-49	7-HCs2	OPTC
PLXNA14	1.111545249724e-51	0.921559899060035	0.717	0.311	1.68943762505551e-47	7-HCs2	PLXNA1
DNER	1.11849502119735e-51	0.731327668597731	0.266	0.043	1.70000058271785e-47	7-HCs2	DNER
FEZ11	3.10239818328938e-51	0.824364184076684	0.472	0.128	4.71533499878153e-47	7-HCs2	FEZ1
RTN11	6.79209086966581e-51	0.614731900957489	0.335	0.065	1.03232989128051e-46	7-HCs2	RTN1
ESRRG	1.73063205447905e-50	0.788342986503357	0.395	0.093	2.63038765960271e-46	7-HCs2	ESRRG
ELAVL45	7.72578622822452e-50	0.54979964060469	0.708	0.272	1.17424224882784e-45	7-HCs2	ELAVL4
ZFHX41	7.9668660878225e-50	0.891417346542287	0.361	0.078	1.21088397668814e-45	7-HCs2	ZFHX4
PXYLP1	6.2301836289906e-49	0.728912192446582	0.412	0.104	9.46925609770281e-45	7-HCs2	PXYLP1
DKK31	8.86192257552505e-49	0.775465715251284	0.369	0.085	1.34692361225405e-44	7-HCs2	DKK3
SLCO5A11	4.22097326008781e-48	0.805432350402805	0.438	0.116	6.41545725800746e-44	7-HCs2	SLCO5A1
NRXN12	9.1863874740904e-48	0.784478008887052	0.554	0.173	1.396239032187e-43	7-HCs2	NRXN1
PTMA2	1.18659475643023e-47	0.410147568900823	1	0.995	1.8035053702983e-43	7-HCs2	PTMA
MARCH41	1.40817535464044e-47	0.759533565434887	0.382	0.09	2.14028572151801e-43	7-HCs2	MARCH4
BASP13	6.02100022075162e-46	0.602155410179408	0.974	0.811	9.15131823552039e-42	7-HCs2	BASP1
PCDH8	2.25762151563898e-45	0.668135635996649	0.253	0.043	3.43135894161968e-41	7-HCs2	PCDH8
RND3	2.54619083172745e-45	0.688049351897977	0.305	0.062	3.86995544514256e-41	7-HCs2	RND3
LOC4228941	2.78772725462855e-45	0.671877564202556	0.408	0.104	4.23706665430994e-41	7-HCs2	LOC422894
CLN6	2.65793165088222e-44	0.701287003057562	0.391	0.102	4.03979031617588e-40	7-HCs2	CLN6
CADM21	3.95958635526257e-44	0.806187681872219	0.515	0.173	6.01817530136358e-40	7-HCs2	CADM2
SELENOP11	6.89488588249214e-44	0.728445489487923	0.335	0.076	1.04795370527998e-39	7-HCs2	SELENOP1
PRNP	1.3431370598961e-43	0.612304542168783	0.27	0.05	2.04143401733608e-39	7-HCs2	PRNP
CABP11	6.0684469815402e-43	0.820221358074448	0.33	0.075	9.22343256724296e-39	7-HCs2	CABP1
SBK11	2.20870499175958e-42	0.712254062654982	0.369	0.092	3.35701071697539e-38	7-HCs2	SBK1
ATP1B1	2.72090130021057e-42	0.763212347136042	0.365	0.096	4.13549788619005e-38	7-HCs2	ATP1B1
CELF4	5.30342780263115e-42	0.805754953865918	0.429	0.125	8.06067991721908e-38	7-HCs2	CELF4
NRP11	7.1133653151821e-42	0.618055972764981	0.266	0.049	1.08116039425453e-37	7-HCs2	NRP1
LHFP2	1.67655745774262e-41	0.721436174553359	0.464	0.146	2.548199680023e-37	7-HCs2	LHFP
RAP1GAP2	5.71667403864198e-41	0.459850168516084	0.253	0.046	8.68877287133194e-37	7-HCs2	RAP1GAP2
ZNF488	6.63789808026696e-41	0.630178975921358	0.258	0.049	1.00889412921978e-36	7-HCs2	ZNF488
SYT1	1.51583276342435e-40	0.633432147645843	0.326	0.075	2.30391421712867e-36	7-HCs2	SYT1
ZEB21	4.82832054538502e-40	0.875932015329208	0.618	0.273	7.33856439693069e-36	7-HCs2	ZEB2
TTYH35	3.87563556245116e-39	0.599016919866412	0.618	0.243	5.89057849136952e-35	7-HCs2	TTYH3
CSDC21	2.97497263135132e-38	0.588942007691054	0.33	0.08	4.52166090239086e-34	7-HCs2	CSDC2
NRG3	8.65157467718504e-38	0.620012930242296	0.275	0.06	1.31495283518535e-33	7-HCs2	NRG3
LDHA6	1.8982536583744e-36	0.717535993833995	0.948	0.717	2.88515573536325e-32	7-HCs2	LDHA
CHGA3	3.26810845766935e-36	1.5438560828907	0.498	0.192	4.96719804481165e-32	7-HCs2	CHGA
SIX34	3.46180875859288e-36	0.808506789281515	0.867	0.603	5.26160313218532e-32	7-HCs2	SIX3
PPIA1	6.52265197961194e-36	0.446175021556475	0.991	0.965	9.91377874381219e-32	7-HCs2	PPIA
ATRN	2.96403419445004e-35	0.824877050524583	0.519	0.21	4.50503557214461e-31	7-HCs2	ATRN
FYN1	5.40343344306536e-35	0.718468153612816	0.476	0.172	8.21267849011504e-31	7-HCs2	FYN
C5H14orf37	1.22822870055556e-34	0.563650549186992	0.335	0.088	1.8667848019744e-30	7-HCs2	C5H14orf37
BRINP1	2.14554538707506e-34	0.638352172241722	0.305	0.077	3.26101443381539e-30	7-HCs2	BRINP1
TANC2	9.36453462577523e-34	0.752112023677124	0.391	0.123	1.42331561777158e-29	7-HCs2	TANC2
GPM6A3	1.05483987224426e-33	0.570177256784323	0.906	0.595	1.60325112182405e-29	7-HCs2	GPM6A
SOX121	1.06475950642762e-33	0.627804095563345	0.322	0.085	1.61832797381933e-29	7-HCs2	SOX12
GPRC5B2	2.31820977411611e-33	0.685501407672361	0.455	0.155	3.52344703567908e-29	7-HCs2	GPRC5B
TUBB2B4	5.28505364797663e-33	0.615812642351952	0.871	0.555	8.03275303955967e-29	7-HCs2	TUBB2B
CRMP14	9.55359144275764e-33	0.715247594531595	0.639	0.316	1.45205036338473e-28	7-HCs2	CRMP1
ZNF385C	1.14888833588364e-32	0.620176906048312	0.3	0.077	1.74619538170955e-28	7-HCs2	ZNF385C
LRCH21	1.16629454780476e-32	0.762059946147861	0.468	0.176	1.77265108320845e-28	7-HCs2	LRCH2
MLLT114	1.53523361477721e-32	0.682440678271531	0.687	0.337	2.33340157109988e-28	7-HCs2	MLLT11
EFNB15	1.12009941507018e-31	0.806687964525796	0.549	0.234	1.70243910096517e-27	7-HCs2	EFNB1
[truncated: 1,137 more rows]
