# Supplementary material for: OTX2 represses sister cell fate choices in the developing retina to promote photoreceptor specification
Source: eLife. 2020 Apr 29;9:e54279. doi: 10.7554/eLife.54279 (PMC7237216; doi:10.7554/eLife.54279)
Supplement: Supplementary file 5. [file elife-54279-supp5.xlsx]

## Sheet: multi RPC
	p_val	avg_logFC	pct.1	pct.2	p_val_adj	cluster	gene
FABP74	0	2.78489	0.989	0.555	0	multi RPCs	FABP7
FGFBP35	0	2.17372	0.752	0.122	0	multi RPCs	FGFBP3
CKB5	0	2.1484	0.981	0.549	0	multi RPCs	CKB
COL2A14	0	1.83316	0.867	0.194	0	multi RPCs	COL2A1
AvBD55	0	1.66527	0.698	0.058	0	multi RPCs	AvBD5
COL5A11	0	1.664	0.731	0.044	0	multi RPCs	COL5A1
CA26	0	1.58727	0.886	0.228	0	multi RPCs	CA2
ID16	0	1.51245	0.56	0.085	0	multi RPCs	ID1
S100A13	0	1.37292	0.412	0.017	0	multi RPCs	S100A13
METRN5	0	1.33154	0.644	0.083	0	multi RPCs	METRN
SLC16A13	0	1.19914	0.616	0.093	0	multi RPCs	SLC16A1
NR2E1	0	1.1556	0.489	0.028	0	multi RPCs	NR2E1
SOX91	0	1.03094	0.491	0.059	0	multi RPCs	SOX9
SLC1A3	0	0.778929	0.284	0.005	0	multi RPCs	SLC1A3
GJA1	0	0.774199	0.279	0.01	0	multi RPCs	GJA1
HEYL	0	0.762923	0.302	0.013	0	multi RPCs	HEYL
LOC107055111	0	0.689654	0.242	0.006	0	multi RPCs	LOC107055111
S100A11	3.15132e-307	0.832073	0.284	0.015	7.55277e-303	multi RPCs	S100A11
SOX214	8.76715e-297	1.38677	0.597	0.105	2.10122e-292	multi RPCs	SOX21
IRX6	2.45177e-294	0.828814	0.375	0.033	5.87615e-290	multi RPCs	IRX6
NRARP6	9.17925e-293	1.45501	0.807	0.231	2.19999e-288	multi RPCs	NRARP
SFRP1	1.21393e-284	1.01464	0.458	0.057	2.90942e-280	multi RPCs	SFRP1
CYP1B1	5.60627e-269	1.76553	0.406	0.049	1.34365e-264	multi RPCs	CYP1B1
IGFBP51	4.47918e-249	0.791047	0.292	0.023	1.07353e-244	multi RPCs	IGFBP5
STC24	6.89053e-245	1.62007	0.591	0.122	1.65145e-240	multi RPCs	STC2
DTX42	3.68978e-239	1.11678	0.65	0.154	8.84329e-235	multi RPCs	DTX4
SLC2A14	7.68023e-238	1.31078	0.816	0.308	1.84072e-233	multi RPCs	SLC2A1
VEPH1	6.62297e-231	0.477949	0.177	0.006	1.58733e-226	multi RPCs	VEPH1
PMP22	3.78405e-230	0.448014	0.13	0.001	9.06924e-226	multi RPCs	PMP22
OAF	5.47057e-226	0.659411	0.27	0.022	1.31113e-221	multi RPCs	OAF
ANKRD33	1.21623e-223	0.440586	0.144	0.003	2.91494e-219	multi RPCs	ANKRD33
ERMN	9.07073e-214	0.423398	0.137	0.003	2.17398e-209	multi RPCs	ERMN
FZD54	1.03206e-211	1.03146	0.597	0.139	2.47354e-207	multi RPCs	FZD5
ID22	2.99179e-211	1.12921	0.469	0.086	7.17043e-207	multi RPCs	ID2
LOC1070542045	3.8945e-211	1.03641	0.583	0.132	9.33394e-207	multi RPCs	LOC107054204
CTNNAL15	1.02697e-200	1.03315	0.537	0.117	2.46134e-196	multi RPCs	CTNNAL1
S100A6	1.10501e-196	1.24116	0.173	0.008	2.64839e-192	multi RPCs	S100A6
TMEM161A5	3.25267e-194	1.01926	0.725	0.228	7.79568e-190	multi RPCs	TMEM161A
FGFRL1	6.12177e-194	0.373522	0.125	0.002	1.4672e-189	multi RPCs	FGFRL1
VSX23	4.65048e-192	0.97922	0.622	0.16	1.11458e-187	multi RPCs	VSX2
PHYKPL	1.24002e-191	0.482606	0.194	0.012	2.97195e-187	multi RPCs	PHYKPL
ADD3	2.01195e-191	0.782863	0.387	0.06	4.82204e-187	multi RPCs	ADD3
ID3	1.54134e-189	0.332173	0.128	0.003	3.69412e-185	multi RPCs	ID3
ACBD7	6.84489e-187	0.780124	0.353	0.051	1.64051e-182	multi RPCs	ACBD7
TYRO31	4.93235e-185	0.844117	0.444	0.084	1.18214e-180	multi RPCs	TYRO3
GNG54	1.44402e-183	0.987001	0.847	0.369	3.46088e-179	multi RPCs	GNG5
KDR	6.45145e-179	0.380192	0.117	0.002	1.54622e-174	multi RPCs	KDR
DBNDD2	1.26827e-177	0.617192	0.256	0.026	3.03967e-173	multi RPCs	DBNDD2
AvBD3	2.48506e-177	0.366393	0.144	0.006	5.95593e-173	multi RPCs	AvBD3
LOC107052240	2.39663e-173	0.747394	0.349	0.053	5.744e-169	multi RPCs	LOC107052240
HES16	1.5775e-165	1.04861	0.614	0.183	3.7808e-161	multi RPCs	HES1
STON2	3.1203e-163	0.547985	0.222	0.021	7.47842e-159	multi RPCs	STON2
PLEKHA2	9.40509e-160	0.673004	0.302	0.043	2.25412e-155	multi RPCs	PLEKHA2
PKDCCA	2.76801e-157	0.552411	0.228	0.023	6.6341e-153	multi RPCs	PKDCCA
CGNL1	7.38491e-153	0.591538	0.259	0.032	1.76994e-148	multi RPCs	CGNL1
GDF3	1.74852e-149	0.493767	0.191	0.017	4.19067e-145	multi RPCs	GDF3
LFNG4	1.32236e-147	1.04547	0.81	0.4	3.1693e-143	multi RPCs	LFNG
FKBP9	1.39207e-144	0.551147	0.244	0.03	3.33637e-140	multi RPCs	FKBP9
CARHSP1	1.99774e-144	0.497326	0.21	0.022	4.78799e-140	multi RPCs	CARHSP1
CHRDL13	9.673e-142	0.882414	0.418	0.094	2.31833e-137	multi RPCs	CHRDL1
RAX7	2.3584e-141	0.906403	0.525	0.15	5.65237e-137	multi RPCs	RAX
OPTC	6.59976e-141	0.569234	0.321	0.053	1.58176e-136	multi RPCs	OPTC
FLNB1	1.26127e-139	0.683142	0.415	0.091	3.02288e-135	multi RPCs	FLNB
LOC101748153	7.31037e-139	0.623976	0.319	0.054	1.75208e-134	multi RPCs	LOC101748153
CELSR12	1.45238e-138	0.7706	0.463	0.114	3.48092e-134	multi RPCs	CELSR1
MN1	3.00221e-138	0.455343	0.199	0.02	7.19539e-134	multi RPCs	MN1
PAG11	1.52865e-130	0.691336	0.34	0.066	3.66372e-126	multi RPCs	PAG1
C1orf226	4.25862e-128	0.314768	0.125	0.007	1.02066e-123	multi RPCs	C1orf226
ETV4	5.54791e-127	0.360521	0.133	0.008	1.32967e-122	multi RPCs	ETV4
ADAMTS181	4.01996e-122	0.595524	0.299	0.055	9.63465e-118	multi RPCs	ADAMTS18
EFNB15	8.82923e-121	0.811358	0.67	0.262	2.1161e-116	multi RPCs	EFNB1
GADD45B	3.10299e-118	0.658894	0.309	0.06	7.43692e-114	multi RPCs	GADD45B
FILIP1	1.84386e-116	0.406246	0.164	0.016	4.41917e-112	multi RPCs	FILIP1
OSBPL2	5.62861e-116	0.691617	0.424	0.109	1.34901e-111	multi RPCs	OSBPL2
PTN1	1.8809e-115	0.817053	0.285	0.052	4.50795e-111	multi RPCs	PTN
TGFBI	4.05922e-115	0.350741	0.122	0.008	9.72872e-111	multi RPCs	TGFBI
FOS2	1.14385e-114	0.909125	0.412	0.11	2.74147e-110	multi RPCs	FOS
LDHB1	1.32715e-113	0.79061	0.545	0.187	3.18078e-109	multi RPCs	LDHB
SCRN1	1.43776e-112	0.592034	0.269	0.048	3.44587e-108	multi RPCs	SCRN1
TMEM123	2.80361e-112	0.363013	0.114	0.007	6.71941e-108	multi RPCs	TMEM123
CA3B	2.91668e-112	0.44008	0.17	0.018	6.99041e-108	multi RPCs	CA3B
LOC1070498151	2.03888e-111	0.804646	0.39	0.099	4.88658e-107	multi RPCs	LOC107049815
MYL9	2.84103e-111	0.301836	0.111	0.007	6.80911e-107	multi RPCs	MYL9
STOX23	3.85138e-111	0.816996	0.835	0.533	9.23061e-107	multi RPCs	STOX2
MYL41	2.23045e-109	0.662671	0.343	0.077	5.34572e-105	multi RPCs	MYL4
TOX23	5.17785e-109	0.692776	0.52	0.166	1.24097e-104	multi RPCs	TOX2
CAB39L	2.3501e-107	0.515031	0.23	0.036	5.63248e-103	multi RPCs	CAB39L
LOC1070490112	5.79054e-107	0.723729	0.525	0.175	1.38782e-102	multi RPCs	LOC107049011
EPAS1	9.58079e-107	0.296499	0.108	0.007	2.29623e-102	multi RPCs	EPAS1
NDRG13	5.24461e-103	0.761225	0.458	0.14	1.25698e-98	multi RPCs	NDRG1
MIF1	3.0744e-102	0.781591	0.934	0.773	7.36842e-98	multi RPCs	MIF
FAM43A3	2.25231e-101	0.75106	0.657	0.271	5.39811e-97	multi RPCs	FAM43A
LGR53	2.48195e-101	0.668293	0.431	0.126	5.9485e-97	multi RPCs	LGR5
CDH3	2.51382e-101	0.375756	0.136	0.013	6.02486e-97	multi RPCs	CDH3
SMO	2.64226e-100	0.474708	0.264	0.05	6.3327e-96	multi RPCs	SMO
KIAA1462	2.66952e-99	0.314855	0.13	0.011	6.39804e-95	multi RPCs	KIAA1462
EEF1D5	9.88373e-99	0.638189	0.948	0.777	2.36883e-94	multi RPCs	EEF1D
LOC4193906	5.04292e-97	0.706659	0.869	0.517	1.20864e-92	multi RPCs	LOC419390
FOXI3	5.55204e-96	0.329417	0.123	0.011	1.33066e-91	multi RPCs	FOXI3
CYFIP1	1.4965e-95	0.513513	0.29	0.062	3.58665e-91	multi RPCs	CYFIP1
RPSA	3.29369e-93	0.457136	0.994	0.971	7.89398e-89	multi RPCs	RPSA
SLC22A235	1.88365e-90	0.63078	0.465	0.151	4.51454e-86	multi RPCs	SLC22A23
GAS1	8.86163e-90	0.502111	0.241	0.047	2.12387e-85	multi RPCs	GAS1
NES3	1.07532e-89	0.72348	0.748	0.393	2.57721e-85	multi RPCs	NES
NECTIN3	2.46168e-89	0.429319	0.218	0.039	5.8999e-85	multi RPCs	NECTIN3
NKAIN44	1.17347e-88	0.627708	0.41	0.125	2.81245e-84	multi RPCs	NKAIN4
METRNL	6.68477e-88	0.343232	0.136	0.015	1.60214e-83	multi RPCs	METRNL
GRB10	9.58953e-88	0.586696	0.355	0.097	2.29832e-83	multi RPCs	GRB10
ENO13	2.21535e-87	0.571418	0.974	0.912	5.30952e-83	multi RPCs	ENO1
VIM4	1.71571e-86	0.768514	0.682	0.315	4.11204e-82	multi RPCs	VIM
AKAP125	1.09429e-85	0.677995	0.662	0.308	2.62269e-81	multi RPCs	AKAP12
NOS1AP	9.28498e-85	0.373907	0.142	0.017	2.22533e-80	multi RPCs	NOS1AP
IGFBP4	3.01011e-83	0.366879	0.154	0.021	7.21433e-79	multi RPCs	IGFBP4
TJP2	3.26389e-83	0.278807	0.12	0.012	7.82257e-79	multi RPCs	TJP2
TACC1	7.25528e-83	0.302479	0.105	0.009	1.73887e-78	multi RPCs	TACC1
NOTCH16	1.51474e-82	0.569468	0.858	0.457	3.63037e-78	multi RPCs	NOTCH1
LOC101749223	1.57115e-82	0.469321	0.222	0.043	3.76558e-78	multi RPCs	LOC101749223
RALY	3.48953e-82	0.488077	0.242	0.051	8.36335e-78	multi RPCs	RALY
PTPRZ1	3.80565e-82	0.421752	0.188	0.032	9.12101e-78	multi RPCs	PTPRZ1
ST3GAL13	4.69909e-81	0.614459	0.389	0.12	1.12623e-76	multi RPCs	ST3GAL1
PON2	4.94561e-81	0.325918	0.136	0.016	1.18532e-76	multi RPCs	PON2
CRYM	1.39786e-80	0.560935	0.401	0.126	3.35026e-76	multi RPCs	CRYM
CKMT1A4	1.62372e-80	0.653607	0.503	0.189	3.89158e-76	multi RPCs	CKMT1A
ITGB8	3.89783e-80	0.564415	0.301	0.077	9.34192e-76	multi RPCs	ITGB8
TNS1	1.19079e-79	0.400998	0.201	0.036	2.85395e-75	multi RPCs	TNS1
CRYAB	1.58291e-79	0.366505	0.113	0.011	3.79377e-75	multi RPCs	CRYAB
KIAA1671	3.57829e-79	0.454107	0.21	0.041	8.57609e-75	multi RPCs	KIAA1671
ANXA5	8.09436e-79	0.322711	0.127	0.015	1.93998e-74	multi RPCs	ANXA5
LOC1070573636	9.75961e-79	0.550135	0.873	0.492	2.33909e-74	multi RPCs	LOC107057363
S1PR1	2.42376e-77	0.35082	0.168	0.027	5.80904e-73	multi RPCs	S1PR1
PLPP33	7.729e-77	0.542786	0.386	0.12	1.85241e-72	multi RPCs	PLPP3
GM2A	1.84044e-75	0.411125	0.19	0.035	4.41099e-71	multi RPCs	GM2A
TANC1	3.04722e-75	0.365958	0.15	0.022	7.30326e-71	multi RPCs	TANC1
LOC100858253	5.28961e-75	0.284773	0.122	0.014	1.26776e-70	multi RPCs	LOC100858253
LOC4171133	6.17043e-74	0.691246	0.687	0.371	1.47887e-69	multi RPCs	LOC417113
HES56	1.85402e-73	0.545782	0.685	0.308	4.44353e-69	multi RPCs	HES5
ITGB5	7.2462e-73	0.416408	0.227	0.049	1.7367e-68	multi RPCs	ITGB5
MCM2	1.83914e-72	0.431058	0.207	0.042	4.40788e-68	multi RPCs	MCM2
VAT1L	2.27765e-72	0.456284	0.211	0.044	5.45884e-68	multi RPCs	VAT1L
CRABP21	1.95365e-71	0.5127	0.29	0.078	4.68232e-67	multi RPCs	CRABP2
ALS2CL	1.80954e-70	0.457572	0.285	0.076	4.33693e-66	multi RPCs	ALS2CL
TIMP3	5.76575e-70	0.308501	0.105	0.011	1.38188e-65	multi RPCs	TIMP3
NKAIN2	3.43386e-69	0.335093	0.165	0.029	8.22994e-65	multi RPCs	NKAIN2
NR3C1	7.09324e-69	0.376578	0.177	0.033	1.70004e-64	multi RPCs	NR3C1
FBN1	1.22067e-67	0.445989	0.273	0.072	2.92558e-63	multi RPCs	FBN1
MINDY4B1	2.01572e-67	0.365539	0.167	0.03	4.83108e-63	multi RPCs	MINDY4B
QKI4	8.43712e-67	0.556748	0.485	0.195	2.02213e-62	multi RPCs	QKI
MDK5	1.24801e-66	0.831389	0.46	0.192	2.99111e-62	multi RPCs	MDK
C1orf532	5.95232e-66	0.497937	0.319	0.097	1.42659e-61	multi RPCs	C1orf53
CHL1	2.53621e-65	0.305767	0.113	0.014	6.07853e-61	multi RPCs	CHL1
COL25A1	3.48139e-65	0.269877	0.106	0.013	8.34384e-61	multi RPCs	COL25A1
DUSP16	5.96427e-64	0.300057	0.127	0.018	1.42946e-59	multi RPCs	DUSP16
LIPG	1.52483e-61	0.273616	0.11	0.014	3.65456e-57	multi RPCs	LIPG
TSPAN6	4.16442e-61	0.331028	0.128	0.02	9.98086e-57	multi RPCs	TSPAN6
TRAM2	1.79189e-60	0.284052	0.12	0.018	4.29462e-56	multi RPCs	TRAM2
AHCYL2	3.0678e-60	0.495788	0.323	0.105	7.3526e-56	multi RPCs	AHCYL2
ARID5B	4.76024e-60	0.360396	0.171	0.035	1.14089e-55	multi RPCs	ARID5B
SYNM	3.13171e-59	0.280859	0.12	0.018	7.50578e-55	multi RPCs	SYNM
POLR3E	1.23008e-58	0.399683	0.174	0.037	2.94813e-54	multi RPCs	POLR3E
HS3ST3B1L1	4.80155e-58	0.346322	0.179	0.038	1.15079e-53	multi RPCs	HS3ST3B1L
LOC100859691	5.88359e-58	0.317202	0.142	0.025	1.41012e-53	multi RPCs	LOC100859691
TSPAN3	2.45768e-57	0.622602	0.6	0.319	5.89032e-53	multi RPCs	TSPAN3
ETV52	4.26257e-56	0.438517	0.319	0.106	1.02161e-51	multi RPCs	ETV5
COX8A1	6.24298e-56	0.415163	0.969	0.888	1.49626e-51	multi RPCs	COX8A
RPS2	8.91157e-55	0.339603	0.98	0.961	2.13584e-50	multi RPCs	RPS2
SPON11	1.45062e-54	0.360665	0.235	0.064	3.47669e-50	multi RPCs	SPON1
RBP53	1.6891e-54	0.515162	0.488	0.214	4.04826e-50	multi RPCs	RBP5
CHCHD23	1.12745e-53	0.403337	0.949	0.876	2.70216e-49	multi RPCs	CHCHD2
CTNNA13	2.13612e-53	0.442156	0.389	0.148	5.11964e-49	multi RPCs	CTNNA1
VTN	3.27095e-53	0.455625	0.273	0.085	7.83948e-49	multi RPCs	VTN
PLEKHG1	6.14898e-53	0.269282	0.145	0.028	1.47373e-48	multi RPCs	PLEKHG1
DUT6	9.08427e-53	0.543637	0.431	0.179	2.17723e-48	multi RPCs	DUT
BAIAP2L1	9.99291e-53	0.308601	0.139	0.026	2.395e-48	multi RPCs	BAIAP2L1
ITGB1	1.27396e-52	0.433531	0.273	0.086	3.0533e-48	multi RPCs	ITGB1
COL11A1	2.47678e-52	0.341018	0.176	0.041	5.93609e-48	multi RPCs	COL11A1
SEMA5B3	6.17379e-52	0.471231	0.404	0.163	1.47967e-47	multi RPCs	SEMA5B
UNC5B1	1.4365e-51	0.43941	0.218	0.06	3.44287e-47	multi RPCs	UNC5B
LIMD1	4.31954e-51	0.340444	0.196	0.05	1.03526e-46	multi RPCs	LIMD1
EPB41L25	4.75477e-50	0.378209	0.534	0.251	1.13957e-45	multi RPCs	EPB41L2
MANF2	5.71078e-50	0.517481	0.611	0.326	1.3687e-45	multi RPCs	MANF
MTMR2	5.96612e-50	0.352881	0.194	0.05	1.4299e-45	multi RPCs	MTMR2
HEY16	2.70919e-49	0.30625	0.41	0.163	6.49311e-45	multi RPCs	HEY1
ID41	5.09275e-49	0.385132	0.23	0.067	1.22058e-44	multi RPCs	ID4
ITGB1BP32	1.01308e-48	0.290793	0.983	0.978	2.42804e-44	multi RPCs	ITGB1BP3
LOC107055115	2.99779e-48	0.312898	0.106	0.017	7.18481e-44	multi RPCs	LOC107055115
GPM6B4	3.37728e-48	0.477943	0.708	0.425	8.09434e-44	multi RPCs	GPM6B
CRB21	9.09873e-48	0.292075	0.157	0.035	2.18069e-43	multi RPCs	CRB2
LBR6	1.53434e-47	0.563042	0.819	0.624	3.67734e-43	multi RPCs	LBR
CCND15	4.15634e-47	0.379778	0.503	0.231	9.9615e-43	multi RPCs	CCND1
SFRP2	6.84479e-47	0.352494	0.16	0.037	1.64049e-42	multi RPCs	SFRP2
LDHA4	7.47854e-47	0.630483	0.873	0.702	1.79238e-42	multi RPCs	LDHA
EPHA43	3.83843e-46	0.450554	0.364	0.147	9.19957e-42	multi RPCs	EPHA4
CENPS6	5.82486e-46	0.446011	0.353	0.141	1.39605e-41	multi RPCs	CENPS
ALDH1A1	8.33172e-46	0.356927	0.156	0.036	1.99686e-41	multi RPCs	ALDH1A1
LHX91	1.03175e-45	0.341313	0.207	0.059	2.47281e-41	multi RPCs	LHX9
FGFR1	1.23748e-45	0.325997	0.194	0.053	2.96586e-41	multi RPCs	FGFR1
RHOB1	1.35502e-45	0.41404	0.244	0.078	3.24757e-41	multi RPCs	RHOB
PALD13	5.99294e-45	0.499621	0.545	0.284	1.43633e-40	multi RPCs	PALD1
LOC101752151	6.01998e-45	0.400008	0.231	0.072	1.44281e-40	multi RPCs	LOC101752151
TCF7L21	1.12114e-44	0.398526	0.309	0.114	2.68705e-40	multi RPCs	TCF7L2
SMAD52	2.65682e-44	0.465456	0.469	0.222	6.36759e-40	multi RPCs	SMAD5
CDH11	3.61281e-44	0.286318	0.148	0.034	8.65881e-40	multi RPCs	CDH11
DBNDD14	1.35922e-43	0.439312	0.465	0.214	3.25764e-39	multi RPCs	DBNDD1
RCN1L	2.16009e-43	0.318526	0.174	0.045	5.1771e-39	multi RPCs	RCN1L
HSPG2	3.37943e-43	0.372915	0.207	0.061	8.09947e-39	multi RPCs	HSPG2
ADGRL23	1.45144e-42	0.378258	0.259	0.089	3.47866e-38	multi RPCs	ADGRL2
SERPINH1	1.78923e-42	0.291923	0.13	0.028	4.28825e-38	multi RPCs	SERPINH1
SELENOP16	2.34665e-42	0.370775	0.255	0.086	5.62423e-38	multi RPCs	SELENOP1
ARHGAP18	4.938e-42	0.287098	0.165	0.043	1.18349e-37	multi RPCs	ARHGAP18
FSTL14	5.15073e-42	0.366796	0.292	0.107	1.23448e-37	multi RPCs	FSTL1
S100A102	2.22355e-41	0.455345	0.319	0.127	5.32918e-37	multi RPCs	S100A10
TMEM165	2.22954e-41	0.389984	0.295	0.111	5.34354e-37	multi RPCs	TMEM165
GPX11	9.8306e-41	0.448346	0.353	0.147	2.3561e-36	multi RPCs	GPX1
RPA34	1.20864e-40	0.433294	0.4	0.177	2.89674e-36	multi RPCs	RPA3
FAM69C	1.7931e-40	0.256537	0.102	0.019	4.29752e-36	multi RPCs	FAM69C
CDCA71	1.17875e-38	0.311493	0.153	0.04	2.82511e-34	multi RPCs	CDCA7
NEK7	2.66857e-38	0.253774	0.125	0.028	6.39575e-34	multi RPCs	NEK7
HMGN35	2.78549e-38	0.448831	0.548	0.299	6.67598e-34	multi RPCs	HMGN3
MCM51	1.77218e-35	0.355986	0.216	0.074	4.24739e-31	multi RPCs	MCM5
NEURL1B	1.92611e-35	0.257476	0.12	0.028	4.61631e-31	multi RPCs	NEURL1B
HMGCS11	2.51732e-35	0.491061	0.519	0.29	6.03327e-31	multi RPCs	HMGCS1
TGIF23	6.14314e-35	0.389027	0.295	0.121	1.47233e-30	multi RPCs	TGIF2
SKP2	7.10165e-35	0.302665	0.193	0.062	1.70205e-30	multi RPCs	SKP2
AVPI1	3.25346e-34	0.303525	0.167	0.05	7.79758e-30	multi RPCs	AVPI1
TNRC183	8.37283e-34	0.436316	0.648	0.421	2.00672e-29	multi RPCs	TNRC18
WBSCR27	1.83221e-33	0.270325	0.131	0.034	4.39126e-29	multi RPCs	WBSCR27
ZNF385C	6.21031e-33	0.280594	0.211	0.072	1.48842e-28	multi RPCs	ZNF385C
CTNNBIP1	6.61686e-33	0.368289	0.25	0.097	1.58586e-28	multi RPCs	CTNNBIP1
TOMM64	7.11914e-33	0.331443	0.872	0.749	1.70624e-28	multi RPCs	TOMM6
1993-09-01	1.90391e-32	0.35344	0.319	0.14	4.5631e-28	multi RPCs	2019-09-09
RFC2	2.11449e-32	0.320004	0.215	0.076	5.0678e-28	multi RPCs	RFC2
CD81	6.59951e-32	0.332164	0.269	0.109	1.5817e-27	multi RPCs	CD81
PODXL4	7.64565e-32	0.45299	0.461	0.248	1.83243e-27	multi RPCs	PODXL
LHFP5	1.66574e-31	0.322801	0.344	0.155	3.99228e-27	multi RPCs	LHFP
FAM181B	4.35297e-31	0.26557	0.177	0.058	1.04328e-26	multi RPCs	FAM181B
SOX131	8.44909e-31	0.310571	0.244	0.095	2.02499e-26	multi RPCs	SOX13
ATP1A11	9.52383e-31	0.359707	0.296	0.129	2.28258e-26	multi RPCs	ATP1A1
ADI1	1.17301e-30	0.283684	0.205	0.074	2.81136e-26	multi RPCs	ADI1
LOC107052887	1.58197e-30	0.250958	0.128	0.035	3.79151e-26	multi RPCs	LOC107052887
LOC1070498623	3.32164e-30	0.327998	0.375	0.179	7.96098e-26	multi RPCs	LOC107049862
FERMT22	6.89326e-30	0.408315	0.562	0.345	1.65211e-25	multi RPCs	FERMT2
FTH11	1.68991e-29	0.269912	0.977	0.929	4.0502e-25	multi RPCs	FTH1
TUBA1A15	1.75136e-29	0.304731	0.929	0.763	4.19747e-25	multi RPCs	TUBA1A1
HMGN46	2.12673e-29	0.319072	0.843	0.651	5.09714e-25	multi RPCs	HMGN4
RBL1	3.54843e-29	0.260579	0.15	0.046	8.50452e-25	multi RPCs	RBL1
ACOT13	4.23755e-29	0.280981	0.208	0.077	1.01561e-24	multi RPCs	ACOT13
ARL8BL1	1.14527e-28	0.332738	0.258	0.108	2.74486e-24	multi RPCs	ARL8BL
RPL171	1.65684e-28	0.250819	0.985	0.976	3.97094e-24	multi RPCs	RPL17
DKK33	2.48854e-28	0.329916	0.225	0.089	5.96429e-24	multi RPCs	DKK3
PLK3	7.79045e-28	0.286874	0.162	0.054	1.86714e-23	multi RPCs	PLK3
SLC40A1	9.83886e-28	0.2621	0.13	0.038	2.35808e-23	multi RPCs	SLC40A1
MRPS121	1.14629e-27	0.382318	0.438	0.24	2.74731e-23	multi RPCs	MRPS12
HES65	1.61463e-27	0.411213	0.329	0.16	3.86979e-23	multi RPCs	HES6
USP36	3.34086e-27	0.258785	0.208	0.079	8.00703e-23	multi RPCs	USP36
NECAB35	3.77322e-27	0.287636	0.454	0.243	9.04327e-23	multi RPCs	NECAB3
PAICS3	4.335e-27	0.319494	0.236	0.096	1.03897e-22	multi RPCs	PAICS
LOC771200	2.4058e-26	0.294861	0.171	0.061	5.76598e-22	multi RPCs	LOC771200
POLR2L1	2.97867e-26	0.362103	0.708	0.514	7.13897e-22	multi RPCs	POLR2L
EEF1B22	8.2798e-26	0.25987	0.963	0.922	1.98442e-21	multi RPCs	EEF1B2
FAM136A1	1.0805e-25	0.368186	0.409	0.221	2.58963e-21	multi RPCs	FAM136A
HRAS4	1.35096e-25	0.360955	0.696	0.484	3.23784e-21	multi RPCs	HRAS
LLGL1	2.93771e-25	0.294169	0.343	0.168	7.04081e-21	multi RPCs	LLGL1
MYCBP	1.02817e-24	0.327958	0.309	0.15	2.46422e-20	multi RPCs	MYCBP
FDFT12	1.11954e-24	0.325246	0.403	0.217	2.68321e-20	multi RPCs	FDFT1
NNF16	1.22201e-24	0.33616	0.426	0.235	2.92879e-20	multi RPCs	NNF1
LOC1125333584	1.40722e-24	0.291993	0.434	0.239	3.37268e-20	multi RPCs	LOC112533358
PRELID11	1.57652e-24	0.378713	0.694	0.506	3.77845e-20	multi RPCs	PRELID1
SUMO35	2.81278e-24	0.34729	0.693	0.494	6.74138e-20	multi RPCs	SUMO3
SYNPR2	2.85768e-24	0.273729	0.259	0.116	6.849e-20	multi RPCs	SYNPR
FAM120A	6.68134e-24	0.33118	0.299	0.146	1.60132e-19	multi RPCs	FAM120A
SLC25A20	1.42008e-23	0.263639	0.19	0.076	3.40351e-19	multi RPCs	SLC25A20
JAM31	1.51961e-23	0.33848	0.381	0.205	3.64204e-19	multi RPCs	JAM3
EIF5A2	3.61122e-23	0.358011	0.713	0.544	8.655e-19	multi RPCs	EIF5A2
LOC112532802	4.28873e-23	0.344585	0.412	0.227	1.02788e-18	multi RPCs	LOC112532802
SAMD4A	4.44484e-23	0.309497	0.253	0.116	1.06529e-18	multi RPCs	SAMD4A
JUND5	5.05356e-23	0.328899	0.733	0.561	1.21119e-18	multi RPCs	JUND
ARHGAP323	9.69977e-23	0.326058	0.367	0.198	2.32474e-18	multi RPCs	ARHGAP32
NPM11	1.23047e-22	0.347801	0.809	0.685	2.94906e-18	multi RPCs	NPM1
ST132	1.47838e-22	0.313096	0.429	0.245	3.54324e-18	multi RPCs	ST13
HELLS6	1.63907e-22	0.295655	0.323	0.165	3.92835e-18	multi RPCs	HELLS
ES1ML1	2.5017e-22	0.353113	0.366	0.2	5.99582e-18	multi RPCs	ES1ML1
PHLPP13	2.79789e-22	0.302429	0.315	0.159	6.7057e-18	multi RPCs	PHLPP1
IMPA22	5.07698e-22	0.305188	0.285	0.14	1.2168e-17	multi RPCs	IMPA2
CACNA2D2	6.0978e-22	0.255407	0.15	0.055	1.46146e-17	multi RPCs	CACNA2D2
TUBA1C1	7.99566e-22	0.333088	0.458	0.268	1.91632e-17	multi RPCs	TUBA1C
NR2F12	1.08213e-21	0.275965	0.497	0.303	2.59353e-17	multi RPCs	NR2F1
MRPS23	1.29749e-21	0.324848	0.381	0.213	3.1097e-17	multi RPCs	MRPS23
MRPS62	1.49792e-21	0.33509	0.415	0.237	3.59007e-17	multi RPCs	MRPS6
EIF4EBP1	1.8107e-21	0.332345	0.744	0.586	4.33971e-17	multi RPCs	EIF4EBP1
PRSS561	1.90548e-21	0.36046	0.127	0.043	4.56687e-17	multi RPCs	PRSS56
SERP1	2.16268e-21	0.303882	0.693	0.509	5.18329e-17	multi RPCs	SERP1
GDF6	2.73187e-21	0.27395	0.21	0.093	6.54748e-17	multi RPCs	GDF6
NAV23	3.35791e-21	0.260597	0.35	0.186	8.04789e-17	multi RPCs	NAV2
FADS21	3.60823e-21	0.323725	0.366	0.204	8.64784e-17	multi RPCs	FADS2
SOHO-12	5.22784e-21	0.32309	0.265	0.131	1.25296e-16	multi RPCs	SOHO-1
ATF3	5.44264e-21	0.280181	0.157	0.061	1.30444e-16	multi RPCs	ATF3
TUBA3E5	1.18635e-20	0.403705	0.392	0.23	2.84331e-16	multi RPCs	TUBA3E
MRPS211	1.5112e-20	0.31098	0.769	0.612	3.62189e-16	multi RPCs	MRPS21
2019-06-02	1.55195e-20	0.318797	0.306	0.159	3.71957e-16	multi RPCs	JUN
RAN6	2.22144e-20	0.351556	0.623	0.441	5.32412e-16	multi RPCs	RAN
IMP3	2.52958e-20	0.254302	0.219	0.099	6.06265e-16	multi RPCs	IMP3
TMEM184B1	3.97052e-20	0.31022	0.364	0.204	9.51613e-16	multi RPCs	TMEM184B
CHCHD3	9.07421e-20	0.263854	0.336	0.179	2.17482e-15	multi RPCs	CHCHD3
TGIF1	2.65665e-19	0.28871	0.202	0.091	6.3672e-15	multi RPCs	TGIF1
WDR1	3.96096e-19	0.264245	0.202	0.091	9.49322e-15	multi RPCs	WDR1
ARL4C5	4.3257e-19	0.294469	0.545	0.357	1.03674e-14	multi RPCs	ARL4C
PDIA4	5.47284e-19	0.269311	0.255	0.126	1.31168e-14	multi RPCs	PDIA4
POU3F23	7.04861e-19	0.250569	0.304	0.158	1.68934e-14	multi RPCs	POU3F2
CBY11	7.34539e-19	0.269682	0.285	0.148	1.76047e-14	multi RPCs	CBY1
MRPL24	1.88372e-18	0.275566	0.377	0.217	4.51471e-14	multi RPCs	MRPL24
DEK6	3.79926e-18	0.284363	0.472	0.3	9.10569e-14	multi RPCs	DEK
HAUS2	4.49262e-18	0.286484	0.238	0.117	1.07675e-13	multi RPCs	HAUS2
IDI15	7.39541e-18	0.322925	0.307	0.168	1.77246e-13	multi RPCs	IDI1
TYMS6	8.92906e-18	0.250043	0.289	0.152	2.14003e-13	multi RPCs	TYMS
ARVCF	1.37846e-17	0.282028	0.437	0.269	3.30376e-13	multi RPCs	ARVCF
ZNF536	1.4443e-17	0.283293	0.316	0.174	3.46155e-13	multi RPCs	ZNF536
NAP1L16	2.26898e-17	0.259722	0.715	0.558	5.43807e-13	multi RPCs	NAP1L1
DNAJC94	2.51365e-17	0.271977	0.313	0.175	6.02445e-13	multi RPCs	DNAJC9
SELENOH2	6.59838e-17	0.260326	0.52	0.345	1.58143e-12	multi RPCs	SELENOH
GNG101	6.81762e-17	0.259545	0.177	0.08	1.63398e-12	multi RPCs	GNG10
MPC1	7.30318e-17	0.258201	0.332	0.185	1.75035e-12	multi RPCs	MPC1
ATP2B11	1.36228e-16	0.262892	0.363	0.218	3.26497e-12	multi RPCs	ATP2B1
SEM1	1.79225e-16	0.264406	0.81	0.7	4.29548e-12	multi RPCs	SEM1
NUDT12	5.57622e-16	0.251563	0.31	0.175	1.33645e-11	multi RPCs	NUDT1
PA2G42	5.66186e-16	0.281718	0.651	0.485	1.35698e-11	multi RPCs	PA2G4
MAML2	5.88752e-16	0.265613	0.184	0.087	1.41106e-11	multi RPCs	MAML2
INSIG12	5.8993e-16	0.364677	0.367	0.227	1.41388e-11	multi RPCs	INSIG1
EIF3E1	8.0982e-16	0.289006	0.679	0.521	1.9409e-11	multi RPCs	EIF3E
ATP1B34	8.94776e-16	0.261507	0.326	0.188	2.14451e-11	multi RPCs	ATP1B3
CTDSPL	1.21025e-15	0.251847	0.395	0.239	2.9006e-11	multi RPCs	CTDSPL
MYL12A	1.49605e-15	0.303338	0.437	0.28	3.58558e-11	multi RPCs	MYL12A
MRPL35	2.22015e-15	0.281939	0.449	0.292	5.32104e-11	multi RPCs	MRPL35
ELOVL61	3.10638e-15	0.26486	0.221	0.114	7.44507e-11	multi RPCs	ELOVL6
TIMM131	3.54321e-15	0.265468	0.799	0.663	8.49202e-11	multi RPCs	TIMM13
XXYLT1	4.2802e-15	0.257699	0.282	0.157	1.02584e-10	multi RPCs	XXYLT1
REEP44	4.79598e-15	0.253991	0.247	0.133	1.14945e-10	multi RPCs	REEP4
RRM26	1.51325e-14	0.255234	0.284	0.16	3.62681e-10	multi RPCs	RRM2
SMIM4	1.12882e-13	0.287415	0.548	0.399	2.70545e-09	multi RPCs	SMIM4
DCPS	1.62526e-13	0.252414	0.276	0.158	3.89525e-09	multi RPCs	DCPS
PSMB4	1.80122e-13	0.255877	0.583	0.414	4.31699e-09	multi RPCs	PSMB4
DBI	2.57027e-13	0.276136	0.361	0.23	6.16018e-09	multi RPCs	DBI
LOC100857622	3.13907e-13	0.31069	0.29	0.173	7.52342e-09	multi RPCs	LOC100857622
YWHAH3	1.13033e-12	0.251461	0.36	0.231	2.70905e-08	multi RPCs	YWHAH
SLC25A5	1.17876e-12	0.254432	0.566	0.412	2.82514e-08	multi RPCs	SLC25A5
HSPE12	3.31827e-11	0.273976	0.542	0.402	7.9529e-07	multi RPCs	HSPE1
RFC51	1.07968e-10	0.263829	0.346	0.23	2.58766e-06	multi RPCs	RFC5
CDK17	3.96931e-09	0.272266	0.387	0.273	9.51324e-05	multi RPCs	CDK1

## Sheet: restr RPC
	p_val	avg_logFC	pct.1	pct.2	p_val_adj	cluster	gene
NEUROG2	0	1.97836	0.925	0.317	0	restr RPC	NEUROG2
E2F1	0	1.93275	0.88	0.257	0	restr RPC	E2F1
VSX1	0	1.76092	0.9	0.292	0	restr RPC	VSX1
DIO3	0	1.52176	0.585	0.108	0	restr RPC	DIO3
LOC107057363	0	1.51461	0.905	0.373	0	restr RPC	LOC107057363
LOC101748650	0	1.49178	0.355	0.054	0	restr RPC	LOC101748650
LOC419390	0	1.47272	0.91	0.403	0	restr RPC	LOC419390
HES5	0	1.44375	0.758	0.175	0	restr RPC	HES5
NEUROD4	0	1.42672	0.813	0.169	0	restr RPC	NEUROD4
TFAP2D	0	1.36611	0.876	0.485	0	restr RPC	TFAP2D
HMGB2	0	1.28678	0.877	0.451	0	restr RPC	HMGB2
DLL1	0	1.28508	0.701	0.175	0	restr RPC	DLL1
NOTCH1	0	1.24716	0.908	0.326	0	restr RPC	NOTCH1
UBE2C	0	1.24161	0.764	0.258	0	restr RPC	UBE2C
PPP1R1A	0	1.23148	0.915	0.529	0	restr RPC	PPP1R1A
CDCA3	0	1.16422	0.695	0.214	0	restr RPC	CDCA3
ASCL1	0	1.14393	0.493	0.059	0	restr RPC	ASCL1
BHLHE22	0	1.13432	0.595	0.156	0	restr RPC	BHLHE22
LOC107049885	0	1.10143	0.837	0.373	0	restr RPC	LOC107049885
OLIG2	0	1.0894	0.884	0.341	0	restr RPC	OLIG2
TOP2A	0	1.06576	0.773	0.27	0	restr RPC	TOP2A
BORL4	0	1.031	0.759	0.274	0	restr RPC	BORL4
CENPF	0	1.02916	0.643	0.181	0	restr RPC	CENPF
KIF4A	0	1.02284	0.68	0.196	0	restr RPC	KIF4A
KPNA2	0	1.00428	0.53	0.144	0	restr RPC	KPNA2
CDK1	0	0.997259	0.592	0.165	0	restr RPC	CDK1
NECAB3	0	0.993649	0.521	0.159	0	restr RPC	NECAB3
NUSAP1	0	0.993257	0.637	0.176	0	restr RPC	NUSAP1
TUBB4B	0	0.986415	0.836	0.593	0	restr RPC	TUBB4B
CKAP2	0	0.978244	0.633	0.18	0	restr RPC	CKAP2
CDC20	0	0.963397	0.497	0.127	0	restr RPC	CDC20
TPX2	0	0.960927	0.638	0.192	0	restr RPC	TPX2
TUBA3E	0	0.922036	0.52	0.137	0	restr RPC	TUBA3E
NUPL2	0	0.917197	0.464	0.091	0	restr RPC	NUPL2
CKS1B	0	0.914139	0.788	0.341	0	restr RPC	CKS1B
RAPGEF3	0	0.912662	0.382	0.045	0	restr RPC	RAPGEF3
BAMBI	0	0.909932	0.839	0.403	0	restr RPC	BAMBI
DAB1	0	0.889996	0.806	0.364	0	restr RPC	DAB1
CDKN2C	0	0.888528	0.388	0.068	0	restr RPC	CDKN2C
ATP8A2	0	0.886184	0.598	0.182	0	restr RPC	ATP8A2
MKI67	0	0.88199	0.604	0.183	0	restr RPC	MKI67
HMGN4	0	0.852261	0.881	0.582	0	restr RPC	HMGN4
PRC1	0	0.834942	0.488	0.131	0	restr RPC	PRC1
ZC3H12C	0	0.82878	0.456	0.112	0	restr RPC	ZC3H12C
CENPA	0	0.816899	0.469	0.118	0	restr RPC	CENPA
KLHL4	0	0.81587	0.383	0.065	0	restr RPC	KLHL4
NRARP	0	0.738522	0.566	0.158	0	restr RPC	NRARP
TUBA1A1	0	0.72299	0.925	0.718	0	restr RPC	TUBA1A1
H2AFV	0	0.70683	0.977	0.891	0	restr RPC	H2AFV
LOC107051857	0	0.594985	0.984	0.867	0	restr RPC	LOC107051857
HMGB1	2.97286e-297	0.677191	0.91	0.796	7.12505e-293	restr RPC	HMGB1
TNFSF10	5.18161e-296	0.915411	0.504	0.152	1.24188e-291	restr RPC	TNFSF10
H2AFZ	5.45004e-292	0.685595	0.889	0.671	1.30621e-287	restr RPC	H2AFZ
NMRK2	1.18057e-291	1.04767	0.544	0.2	2.82948e-287	restr RPC	NMRK2
BIRC5	1.37007e-287	0.736302	0.519	0.16	3.28365e-283	restr RPC	BIRC5
STK38L	5.83886e-283	0.719735	0.698	0.31	1.3994e-278	restr RPC	STK38L
CDK6	3.44449e-281	0.708582	0.716	0.331	8.2554e-277	restr RPC	CDK6
SPC25	4.07004e-280	0.77444	0.454	0.127	9.75467e-276	restr RPC	SPC25
BUB1B	4.41231e-278	0.78159	0.478	0.14	1.0575e-273	restr RPC	BUB1B
LBR	6.01908e-276	0.703512	0.839	0.562	1.44259e-271	restr RPC	LBR
FOXN4	7.49021e-268	0.62156	0.258	0.031	1.79518e-263	restr RPC	FOXN4
INPP4A	2.15406e-266	0.815646	0.661	0.316	5.16264e-262	restr RPC	INPP4A
LOC107050024	2.22366e-266	0.74665	0.587	0.224	5.32945e-262	restr RPC	LOC107050024
PTTG1	9.62493e-260	0.748517	0.4	0.102	2.30681e-255	restr RPC	PTTG1
CKS2	1.51612e-259	0.730188	0.375	0.088	3.63369e-255	restr RPC	CKS2
MYBL1	2.67774e-259	0.727805	0.572	0.215	6.41774e-255	restr RPC	MYBL1
INCENP	3.39322e-258	0.732768	0.467	0.142	8.13254e-254	restr RPC	INCENP
KIFC1L	7.09545e-257	0.690549	0.46	0.135	1.70057e-252	restr RPC	KIFC1L
MXD3	7.99074e-253	0.815116	0.463	0.146	1.91514e-248	restr RPC	MXD3
PLK1	9.87134e-247	0.722651	0.436	0.129	2.36586e-242	restr RPC	PLK1
NUCKS1	6.73046e-245	0.65551	0.821	0.563	1.61309e-240	restr RPC	NUCKS1
KNSTRN	5.1696e-242	0.690475	0.418	0.12	1.239e-237	restr RPC	KNSTRN
ASPM	1.86418e-241	0.721569	0.53	0.194	4.46788e-237	restr RPC	ASPM
H2A2BL	2.80623e-241	0.906218	0.792	0.547	6.72568e-237	restr RPC	H2A2BL
PCDH17	5.74296e-241	0.845391	0.492	0.178	1.37641e-236	restr RPC	PCDH17
DLL4	1.15736e-240	0.687162	0.407	0.109	2.77384e-236	restr RPC	DLL4
TFDP2	1.43962e-234	0.635204	0.806	0.49	3.45033e-230	restr RPC	TFDP2
FOXN3	3.55482e-234	0.694222	0.539	0.213	8.51984e-230	restr RPC	FOXN3
DLGAP5	8.44163e-234	0.68959	0.385	0.103	2.02321e-229	restr RPC	DLGAP5
RPS20	3.59281e-230	0.262863	0.999	0.997	8.6109e-226	restr RPC	RPS20
SMC2	4.06399e-229	0.678224	0.432	0.131	9.74017e-225	restr RPC	SMC2
HYLS1	4.80608e-225	0.633732	0.369	0.097	1.15187e-220	restr RPC	HYLS1
DENND5B	2.66076e-223	0.707205	0.714	0.403	6.37703e-219	restr RPC	DENND5B
DCK	3.61787e-221	0.692342	0.408	0.126	8.67094e-217	restr RPC	DCK
LOC770126	3.99955e-219	0.532277	0.221	0.028	9.58571e-215	restr RPC	LOC770126
CENPE	1.14573e-218	0.617591	0.366	0.098	2.74596e-214	restr RPC	CENPE
CENPW	6.28849e-212	0.62702	0.394	0.117	1.50716e-207	restr RPC	CENPW
DSCR3	1.71171e-209	0.655223	0.516	0.203	4.10246e-205	restr RPC	DSCR3
SDK1	1.31308e-206	0.577053	0.282	0.058	3.14706e-202	restr RPC	SDK1
RACGAP1	1.3154e-206	0.601756	0.35	0.094	3.15261e-202	restr RPC	RACGAP1
TACC3	1.58854e-206	0.617655	0.381	0.112	3.80725e-202	restr RPC	TACC3
SLC35A1	1.79107e-205	0.649764	0.372	0.11	4.29265e-201	restr RPC	SLC35A1
ECT2	1.57561e-204	0.625509	0.38	0.113	3.77626e-200	restr RPC	ECT2
CCNB2	2.38622e-204	0.646437	0.449	0.157	5.71905e-200	restr RPC	CCNB2
SPAG5	1.09626e-202	0.637303	0.71	0.394	2.6274e-198	restr RPC	SPAG5
RAX	1.82828e-202	0.593415	0.367	0.103	4.38185e-198	restr RPC	RAX
AMMECR1	1.23212e-201	0.687474	0.506	0.209	2.95301e-197	restr RPC	AMMECR1
NCAPH	1.30113e-201	0.625213	0.354	0.1	3.11841e-197	restr RPC	NCAPH
KIF2C	3.41654e-201	0.60576	0.328	0.084	8.18843e-197	restr RPC	KIF2C
HMMR	1.94424e-200	0.621421	0.318	0.08	4.65977e-196	restr RPC	HMMR
TCF3	9.90665e-200	0.5397	0.823	0.547	2.37433e-195	restr RPC	TCF3
UHRF1	6.66514e-197	0.639343	0.475	0.181	1.59743e-192	restr RPC	UHRF1
SGO1	5.62313e-194	0.593107	0.348	0.098	1.3477e-189	restr RPC	SGO1
SAP30	2.38437e-193	0.623047	0.381	0.12	5.71462e-189	restr RPC	SAP30
NDUFA13	2.66091e-193	0.541844	0.876	0.7	6.37739e-189	restr RPC	NDUFA13
CCSAP	1.52107e-192	0.633513	0.302	0.075	3.64556e-188	restr RPC	CCSAP
ARHGAP11A	9.18508e-192	0.569842	0.312	0.08	2.20139e-187	restr RPC	ARHGAP11A
BCL7A	3.7813e-191	0.621763	0.743	0.466	9.06264e-187	restr RPC	BCL7A
TRIM8	1.55454e-189	0.616465	0.558	0.257	3.72577e-185	restr RPC	TRIM8
SMC4	2.00648e-188	0.574282	0.375	0.117	4.80893e-184	restr RPC	SMC4
NEK2	2.07972e-188	0.578885	0.3	0.075	4.98448e-184	restr RPC	NEK2
KIFC1	9.52002e-184	0.597304	0.372	0.119	2.28166e-179	restr RPC	KIFC1
PBK	4.2072e-181	0.584672	0.352	0.107	1.00834e-176	restr RPC	PBK
KIF20A	1.23738e-180	0.575965	0.319	0.088	2.96563e-176	restr RPC	KIF20A
MAD2L1	9.88643e-179	0.575059	0.398	0.136	2.36948e-174	restr RPC	MAD2L1
INSM1	8.5888e-177	0.465562	0.932	0.724	2.05848e-172	restr RPC	INSM1
BUB1	5.93696e-174	0.519988	0.277	0.068	1.42291e-169	restr RPC	BUB1
HES4	8.57084e-174	0.582759	0.533	0.236	2.05417e-169	restr RPC	HES4
PODXL	6.19113e-172	0.543324	0.468	0.186	1.48383e-167	restr RPC	PODXL
ENDOU	7.93362e-172	0.428896	0.142	0.01	1.90145e-167	restr RPC	ENDOU
CKLF	1.19531e-171	0.600683	0.458	0.188	2.8648e-167	restr RPC	CKLF
RRM1	1.90254e-171	0.614394	0.408	0.149	4.55982e-167	restr RPC	RRM1
NDC80	2.06752e-170	0.512377	0.281	0.071	4.95523e-166	restr RPC	NDC80
AKAP12	4.78443e-170	0.575512	0.549	0.25	1.14669e-165	restr RPC	AKAP12
SPOCK1	9.63687e-170	0.534649	0.265	0.063	2.30967e-165	restr RPC	SPOCK1
PSIP1	6.45432e-168	0.633822	0.581	0.306	1.54691e-163	restr RPC	PSIP1
KIF11	6.14118e-167	0.500158	0.259	0.061	1.47186e-162	restr RPC	KIF11
LOC427400	2.56794e-165	0.48653	0.164	0.019	6.15457e-161	restr RPC	LOC427400
PCOLCE2	4.70658e-165	0.499581	0.237	0.05	1.12803e-160	restr RPC	PCOLCE2
NPY	6.35054e-164	0.783392	0.226	0.046	1.52203e-159	restr RPC	NPY
FAM72A	1.38518e-163	0.554977	0.313	0.092	3.31986e-159	restr RPC	FAM72A
CBX5	2.09023e-163	0.594362	0.648	0.378	5.00965e-159	restr RPC	CBX5
G2E3	2.26662e-162	0.554085	0.382	0.136	5.43241e-158	restr RPC	G2E3
EEF1D	4.52464e-161	0.450973	0.898	0.747	1.08442e-156	restr RPC	EEF1D
AURKA	5.92155e-160	0.509403	0.307	0.09	1.41922e-155	restr RPC	AURKA
TMPO	8.80762e-160	0.585461	0.536	0.264	2.11092e-155	restr RPC	TMPO
KIF14	2.51035e-158	0.476956	0.238	0.054	6.01655e-154	restr RPC	KIF14
SPC24	4.30128e-158	0.526008	0.341	0.113	1.03089e-153	restr RPC	SPC24
ESPL1	1.12783e-156	0.528993	0.287	0.081	2.70307e-152	restr RPC	ESPL1
SPON1	1.25152e-155	0.459422	0.19	0.033	2.99951e-151	restr RPC	SPON1
HNRNPA0	1.42166e-154	0.490012	0.775	0.538	3.40729e-150	restr RPC	HNRNPA0
GPX3	1.12784e-151	0.545088	0.62	0.339	2.7031e-147	restr RPC	GPX3
CCNF	7.52275e-151	0.448691	0.231	0.053	1.80298e-146	restr RPC	CCNF
ATP1B3	6.00358e-150	0.520976	0.368	0.134	1.43888e-145	restr RPC	ATP1B3
MIS18BP1	3.30723e-148	0.533413	0.311	0.099	7.92643e-144	restr RPC	MIS18BP1
HDGF	1.5359e-145	0.457859	0.854	0.69	3.6811e-141	restr RPC	HDGF
FEZF2	1.99103e-145	0.456047	0.226	0.052	4.77191e-141	restr RPC	FEZF2
PENK	5.45111e-145	0.432953	0.18	0.031	1.30647e-140	restr RPC	PENK
C20orf27	7.4213e-144	0.603916	0.439	0.193	1.77866e-139	restr RPC	C20orf27
PXDC1	4.41768e-143	0.426566	0.21	0.045	1.05879e-138	restr RPC	PXDC1
TRPC1	1.07852e-142	0.505288	0.312	0.101	2.58488e-138	restr RPC	TRPC1
KNL1	1.81556e-142	0.461545	0.251	0.067	4.35135e-138	restr RPC	KNL1
B3GLCT	2.04249e-141	0.434699	0.184	0.035	4.89524e-137	restr RPC	B3GLCT
NNF1	2.77505e-141	0.522002	0.429	0.181	6.65095e-137	restr RPC	NNF1
MMEL1	2.38162e-140	0.49086	0.173	0.03	5.70803e-136	restr RPC	MMEL1
HMGN5	9.02365e-139	0.399522	0.873	0.71	2.1627e-134	restr RPC	HMGN5
LOC107049257	2.65279e-138	0.467332	0.268	0.078	6.35794e-134	restr RPC	LOC107049257
GKAP1	8.70807e-138	0.518501	0.3	0.099	2.08706e-133	restr RPC	GKAP1
LNX1	2.0683e-135	0.486186	0.31	0.104	4.9571e-131	restr RPC	LNX1
LOC107054889	8.19929e-134	0.324881	0.103	0.006	1.96512e-129	restr RPC	LOC107054889
NUF2	1.07315e-133	0.39561	0.186	0.037	2.57203e-129	restr RPC	NUF2
PDCD4	4.51349e-132	0.491774	0.476	0.227	1.08175e-127	restr RPC	PDCD4
KIF20B	1.36264e-131	0.478872	0.266	0.081	3.26585e-127	restr RPC	KIF20B
LOC112530288	1.87682e-131	0.467158	0.293	0.096	4.49817e-127	restr RPC	LOC112530288
PCDH10	7.19306e-131	0.741099	0.363	0.151	1.72396e-126	restr RPC	PCDH10
TTK	5.02571e-130	0.451824	0.263	0.079	1.20451e-125	restr RPC	TTK
CENPH	1.51757e-129	0.463261	0.287	0.094	3.63717e-125	restr RPC	CENPH
CDH20	2.07484e-128	0.392325	0.17	0.032	4.97278e-124	restr RPC	CDH20
MRPL51	4.87447e-128	0.472507	0.744	0.518	1.16826e-123	restr RPC	MRPL51
CENPS	1.23467e-127	0.496544	0.297	0.102	2.95914e-123	restr RPC	CENPS
NAP1L1	1.76651e-127	0.4269	0.746	0.502	4.23381e-123	restr RPC	NAP1L1
PTMS	3.40679e-127	0.466111	0.774	0.562	8.16505e-123	restr RPC	PTMS
CCDC173	2.33985e-125	0.593588	0.704	0.486	5.60791e-121	restr RPC	CCDC173
COBLL1	6.67151e-125	0.433293	0.261	0.079	1.59896e-120	restr RPC	COBLL1
LMNB2	5.48814e-123	0.503565	0.437	0.207	1.31534e-118	restr RPC	LMNB2
USP1	6.40999e-123	0.521613	0.376	0.16	1.53628e-118	restr RPC	USP1
TALDO1	1.70344e-122	0.555319	0.448	0.22	4.08264e-118	restr RPC	TALDO1
B3GAT1L	1.30496e-121	0.28886	0.112	0.011	3.1276e-117	restr RPC	B3GAT1L
RBM38	4.40332e-121	0.441446	0.74	0.482	1.05534e-116	restr RPC	RBM38
H1FX	1.21908e-120	0.453316	0.808	0.631	2.92178e-116	restr RPC	H1FX
GNG5	5.44894e-120	0.444971	0.591	0.329	1.30595e-115	restr RPC	GNG5
SINHCAF	2.69299e-119	0.483928	0.572	0.325	6.45428e-115	restr RPC	SINHCAF
KIF15	2.923e-119	0.424667	0.252	0.078	7.00555e-115	restr RPC	KIF15
CCDC15	3.26581e-119	0.411039	0.231	0.066	7.82716e-115	restr RPC	CCDC15
REEP4	4.7145e-119	0.4436	0.274	0.091	1.12992e-114	restr RPC	REEP4
KCNT2	4.95156e-119	0.464936	0.358	0.146	1.18674e-114	restr RPC	KCNT2
NCAPD3	5.0666e-119	0.414144	0.214	0.057	1.21431e-114	restr RPC	NCAPD3
NCAPD2	6.14351e-119	0.435342	0.282	0.096	1.47241e-114	restr RPC	NCAPD2
TMEM260	8.51909e-119	0.438455	0.256	0.08	2.04177e-114	restr RPC	TMEM260
GPSM2	1.27084e-117	0.457451	0.317	0.12	3.04582e-113	restr RPC	GPSM2
SYNJ2BP	1.41499e-117	0.479814	0.323	0.125	3.3913e-113	restr RPC	SYNJ2BP
SLC4A7	4.83362e-117	0.620029	0.459	0.241	1.15847e-112	restr RPC	SLC4A7
RTKN2	6.79824e-116	0.39478	0.203	0.053	1.62933e-111	restr RPC	RTKN2
NCAPG	1.39846e-115	0.379454	0.193	0.048	3.35169e-111	restr RPC	NCAPG
NET1	1.44589e-115	0.434525	0.261	0.086	3.46537e-111	restr RPC	NET1
KIF18A	7.68988e-115	0.399284	0.218	0.061	1.84303e-110	restr RPC	KIF18A
RAN	2.51047e-114	0.468042	0.621	0.39	6.01684e-110	restr RPC	RAN
RASSF1	3.54863e-114	0.479716	0.374	0.164	8.505e-110	restr RPC	RASSF1
SMARCA5	9.66753e-114	0.448805	0.603	0.358	2.31702e-109	restr RPC	SMARCA5
TOMM6	9.4449e-113	0.366751	0.877	0.712	2.26366e-108	restr RPC	TOMM6
FSTL1	1.42378e-112	0.43515	0.239	0.075	3.41238e-108	restr RPC	FSTL1
ERN2	3.3806e-112	0.280774	0.103	0.01	8.10228e-108	restr RPC	ERN2
UBE2S	1.26353e-111	0.506045	0.457	0.236	3.0283e-107	restr RPC	UBE2S
HELLS	1.9565e-111	0.440187	0.316	0.123	4.68915e-107	restr RPC	HELLS
RRM2	2.34969e-111	0.497281	0.308	0.117	5.63149e-107	restr RPC	RRM2
NHS	3.25131e-111	0.439955	0.307	0.116	7.79241e-107	restr RPC	NHS
STOM	3.36625e-111	0.347017	0.115	0.014	8.06789e-107	restr RPC	STOM
CIT	7.75238e-111	0.395752	0.22	0.064	1.85801e-106	restr RPC	CIT
KIF18B	8.82449e-111	0.379763	0.181	0.043	2.11497e-106	restr RPC	KIF18B
E2F2	1.43099e-110	0.410978	0.192	0.05	3.42965e-106	restr RPC	E2F2
KIF23	2.22095e-110	0.390253	0.205	0.056	5.32294e-106	restr RPC	KIF23
SNTA1	2.83048e-108	0.316203	0.109	0.013	6.78381e-104	restr RPC	SNTA1
CREB3L1	8.03435e-108	0.330569	0.115	0.015	1.92559e-103	restr RPC	CREB3L1
RAD21	2.59624e-107	0.459511	0.557	0.326	6.22241e-103	restr RPC	RAD21
HES6	2.21635e-106	0.507403	0.306	0.121	5.31193e-102	restr RPC	HES6
TNFAIP8L1	2.00537e-105	0.407725	0.211	0.062	4.80627e-101	restr RPC	TNFAIP8L1
CEP55	3.10915e-105	0.364245	0.18	0.045	7.4517e-101	restr RPC	CEP55
TAF10	7.43327e-105	0.471013	0.621	0.406	1.78153e-100	restr RPC	TAF10
GAS2L3	1.22317e-104	0.355936	0.172	0.042	2.93158e-100	restr RPC	GAS2L3
HMGN3	1.55508e-104	0.444452	0.48	0.254	3.72707e-100	restr RPC	HMGN3
POU3F2	4.55411e-104	0.433497	0.301	0.118	1.09148e-99	restr RPC	POU3F2
ACYP2	1.76488e-103	0.42944	0.373	0.169	4.22989e-99	restr RPC	ACYP2
EZR	2.45221e-103	0.423045	0.363	0.159	5.8772e-99	restr RPC	EZR
BBS12	1.49067e-102	0.354325	0.183	0.048	3.5727e-98	restr RPC	BBS12
CDCA2	1.51259e-102	0.375368	0.196	0.055	3.62521e-98	restr RPC	CDCA2
PLK4	1.30965e-101	0.390916	0.229	0.074	3.13884e-97	restr RPC	PLK4
B4GALT6	2.38719e-101	0.388467	0.24	0.081	5.72138e-97	restr RPC	B4GALT6
BRCA1	3.89789e-101	0.422249	0.239	0.08	9.34208e-97	restr RPC	BRCA1
LOC112533358	2.38266e-99	0.597156	0.394	0.198	5.71053e-95	restr RPC	LOC112533358
NEUROG1	5.89742e-99	0.38439	0.179	0.047	1.41343e-94	restr RPC	NEUROG1
PDZD11	8.64907e-98	0.428456	0.333	0.146	2.07292e-93	restr RPC	PDZD11
CHAC1	2.14111e-97	0.647177	0.238	0.084	5.13161e-93	restr RPC	CHAC1
ARHGAP19	2.29337e-97	0.369488	0.231	0.077	5.49652e-93	restr RPC	ARHGAP19
PDE9A	3.81309e-97	0.297225	0.145	0.031	9.13883e-93	restr RPC	PDE9A
GADD45A	6.02042e-97	0.353899	0.736	0.505	1.44291e-92	restr RPC	GADD45A
FOXP1	7.31213e-97	0.438125	0.594	0.368	1.7525e-92	restr RPC	FOXP1
FAT1	1.33001e-96	0.412407	0.343	0.15	3.18765e-92	restr RPC	FAT1
FAM83D	1.07377e-95	0.387029	0.216	0.07	2.57351e-91	restr RPC	FAM83D
NASP	2.23237e-95	0.391156	0.593	0.356	5.35031e-91	restr RPC	NASP
TYMS	3.85527e-95	0.432432	0.285	0.115	9.23993e-91	restr RPC	TYMS
QSOX2	8.06549e-95	0.391065	0.32	0.135	1.93305e-90	restr RPC	QSOX2
WEE1	8.60361e-95	0.385427	0.281	0.11	2.06203e-90	restr RPC	WEE1
DNA2	2.29797e-94	0.39116	0.177	0.049	5.50755e-90	restr RPC	DNA2
ATAD5	2.5305e-94	0.466272	0.246	0.09	6.06485e-90	restr RPC	ATAD5
KIAA1549	3.83438e-94	0.450651	0.638	0.419	9.18985e-90	restr RPC	KIAA1549
FBXW7	4.03435e-94	0.467654	0.519	0.304	9.66912e-90	restr RPC	FBXW7
GTSE1	1.85207e-93	0.355934	0.183	0.052	4.43886e-89	restr RPC	GTSE1
LOC419112	2.15281e-93	0.393901	0.273	0.105	5.15965e-89	restr RPC	LOC419112
NDE1	5.00349e-93	0.339283	0.183	0.052	1.19919e-88	restr RPC	NDE1
E2F8	8.87711e-93	0.39985	0.209	0.068	2.12758e-88	restr RPC	E2F8
CENPM	3.72974e-92	0.332119	0.155	0.038	8.93906e-88	restr RPC	CENPM
SSNA1	6.51856e-92	0.399955	0.393	0.192	1.5623e-87	restr RPC	SSNA1
CEP70	1.19518e-91	0.391813	0.266	0.103	2.86448e-87	restr RPC	CEP70
GLT8D1	8.5703e-91	0.332136	0.184	0.054	2.05404e-86	restr RPC	GLT8D1
TERF1	1.19769e-90	0.361861	0.219	0.075	2.87049e-86	restr RPC	TERF1
MAP4K3	7.3975e-90	0.470264	0.274	0.112	1.77296e-85	restr RPC	MAP4K3
CKAP5	1.3821e-89	0.426729	0.468	0.259	3.31248e-85	restr RPC	CKAP5
SRSF7L	7.01448e-89	0.407745	0.51	0.299	1.68116e-84	restr RPC	SRSF7L
DSN1	1.17816e-86	0.388836	0.389	0.196	2.82369e-82	restr RPC	DSN1
CD164	1.46824e-86	0.406666	0.358	0.171	3.51894e-82	restr RPC	CD164
ANLN	2.52706e-86	0.339294	0.186	0.057	6.05659e-82	restr RPC	ANLN
HMGN1	3.99148e-86	0.383341	0.566	0.351	9.56639e-82	restr RPC	HMGN1
FAM189A1	8.25017e-86	0.293348	0.132	0.029	1.97732e-81	restr RPC	FAM189A1
TRIM59	2.28778e-85	0.355254	0.204	0.068	5.48311e-81	restr RPC	TRIM59
PIF1	1.0814e-84	0.273833	0.12	0.024	2.59178e-80	restr RPC	PIF1
PASK	6.43387e-84	0.293189	0.128	0.028	1.54201e-79	restr RPC	PASK
CALCB	6.69687e-84	0.284681	0.142	0.035	1.60504e-79	restr RPC	CALCB
FOXP2	1.65312e-83	0.340783	0.189	0.061	3.96202e-79	restr RPC	FOXP2
SKA3	2.2409e-82	0.277373	0.141	0.035	5.37077e-78	restr RPC	SKA3
GALNT1	3.16171e-82	0.373135	0.427	0.227	7.57767e-78	restr RPC	GALNT1
ADAMTS18	4.06904e-82	0.313974	0.152	0.041	9.75226e-78	restr RPC	ADAMTS18
LOC424111	1.10248e-81	0.272271	0.126	0.028	2.64232e-77	restr RPC	LOC424111
SEMA5B	2.97094e-81	0.359582	0.302	0.133	7.12045e-77	restr RPC	SEMA5B
ST13	1.07555e-80	0.382763	0.394	0.206	2.57777e-76	restr RPC	ST13
THYN1	1.43957e-80	0.333852	0.215	0.078	3.45023e-76	restr RPC	THYN1
GSTO1	2.7027e-80	0.352986	0.249	0.1	6.47756e-76	restr RPC	GSTO1
DIAPH3	2.75758e-80	0.325132	0.184	0.059	6.60909e-76	restr RPC	DIAPH3
THSD7A	3.27035e-80	0.332308	0.194	0.065	7.83805e-76	restr RPC	THSD7A
SPATS2L	1.89019e-79	0.352543	0.203	0.071	4.53022e-75	restr RPC	SPATS2L
CTNNAL1	1.8943e-79	0.309814	0.257	0.103	4.54007e-75	restr RPC	CTNNAL1
CHCHD2	2.3961e-79	0.305558	0.931	0.862	5.74273e-75	restr RPC	CHCHD2
ID4	4.54127e-79	0.320156	0.161	0.047	1.08841e-74	restr RPC	ID4
CDKN3	1.37365e-78	0.329708	0.192	0.065	3.29224e-74	restr RPC	CDKN3
SYNE1	4.44112e-78	0.320148	0.144	0.038	1.0644e-73	restr RPC	SYNE1
ASF1A	5.26274e-78	0.353887	0.251	0.103	1.26132e-73	restr RPC	ASF1A
LRP11	7.39077e-78	0.3512	0.64	0.431	1.77134e-73	restr RPC	LRP11
CEP350L	1.40524e-77	0.304878	0.152	0.042	3.36794e-73	restr RPC	CEP350L
CENPC	1.46087e-77	0.323487	0.172	0.055	3.50126e-73	restr RPC	CENPC
CIB2	1.49704e-77	0.25329	0.101	0.018	3.58795e-73	restr RPC	CIB2
TICRR	3.61969e-77	0.331659	0.191	0.065	8.67532e-73	restr RPC	TICRR
BUB3	6.18571e-77	0.392369	0.342	0.172	1.48253e-72	restr RPC	BUB3
FANCL	3.48132e-76	0.284571	0.157	0.046	8.34367e-72	restr RPC	FANCL
DEK	3.61374e-76	0.375446	0.456	0.258	8.66106e-72	restr RPC	DEK
CENPP	5.62636e-76	0.28897	0.157	0.047	1.34847e-71	restr RPC	CENPP
LYPD1	7.20226e-76	0.258447	0.106	0.021	1.72617e-71	restr RPC	LYPD1
TLE3	2.45235e-75	0.364188	0.495	0.292	5.87755e-71	restr RPC	TLE3
FBXO5	2.77464e-75	0.332381	0.193	0.067	6.64998e-71	restr RPC	FBXO5
GCNA	9.41244e-75	0.305439	0.162	0.05	2.25588e-70	restr RPC	GCNA
ACTR6	9.9074e-75	0.377378	0.454	0.262	2.37451e-70	restr RPC	ACTR6
LOC421419	8.62875e-74	0.292409	0.159	0.048	2.06805e-69	restr RPC	LOC421419
KMT5A	1.31394e-73	0.338743	0.234	0.094	3.14912e-69	restr RPC	KMT5A
PNRC2	6.01986e-73	0.384021	0.472	0.281	1.44278e-68	restr RPC	PNRC2
TTC32	8.26578e-73	0.333513	0.243	0.1	1.98106e-68	restr RPC	TTC32
PAPPA	1.16165e-72	0.296128	0.141	0.039	2.78413e-68	restr RPC	PAPPA
CETN1	1.45455e-72	0.339052	0.26	0.112	3.48613e-68	restr RPC	CETN1
NID1	1.89478e-72	0.289371	0.135	0.036	4.54122e-68	restr RPC	NID1
FAM183A	3.78035e-72	0.263549	0.118	0.028	9.06037e-68	restr RPC	FAM183A
RMI2	6.97488e-72	0.368194	0.277	0.127	1.67167e-67	restr RPC	RMI2
LHX9	9.32238e-72	0.301932	0.142	0.041	2.2343e-67	restr RPC	LHX9
FZD5	1.30675e-71	0.325547	0.282	0.126	3.13189e-67	restr RPC	FZD5
NCAPH2	2.05707e-71	0.295222	0.177	0.06	4.93018e-67	restr RPC	NCAPH2
BORA	9.74002e-71	0.287241	0.136	0.038	2.33439e-66	restr RPC	BORA
HJURP	1.08051e-70	0.311831	0.162	0.052	2.58965e-66	restr RPC	HJURP
LOC107052236	1.94219e-69	0.355747	0.219	0.088	4.65485e-65	restr RPC	LOC107052236
SELENOH	5.12871e-69	0.374973	0.496	0.304	1.2292e-64	restr RPC	SELENOH
LZTFL1	9.93749e-69	0.270623	0.134	0.037	2.38172e-64	restr RPC	LZTFL1
TSPAN7	1.36736e-68	0.322105	0.547	0.348	3.27714e-64	restr RPC	TSPAN7
FEN1	1.94568e-68	0.338068	0.293	0.139	4.66321e-64	restr RPC	FEN1
NDC1	2.21826e-68	0.305498	0.184	0.066	5.3165e-64	restr RPC	NDC1
ANAPC10	2.93976e-68	0.365137	0.321	0.163	7.04572e-64	restr RPC	ANAPC10
CYP21A1	7.1534e-68	0.26219	0.128	0.035	1.71446e-63	restr RPC	CYP21A1
H2AFX	1.03897e-67	0.324328	0.209	0.083	2.4901e-63	restr RPC	H2AFX
ADH5	8.84048e-67	0.325065	0.459	0.272	2.1188e-62	restr RPC	ADH5
LOC107056600	9.84038e-67	0.293076	0.192	0.072	2.35844e-62	restr RPC	LOC107056600
FOXM1	5.28776e-66	0.258769	0.137	0.04	1.26732e-61	restr RPC	FOXM1
RFC1	9.38746e-66	0.348117	0.295	0.143	2.24989e-61	restr RPC	RFC1
FAM20B	9.52925e-66	0.343213	0.291	0.142	2.28388e-61	restr RPC	FAM20B
RCOR3	1.19593e-65	0.324917	0.63	0.44	2.86627e-61	restr RPC	RCOR3
DNLZ	1.40974e-65	0.356144	0.531	0.346	3.37873e-61	restr RPC	DNLZ
ZBTB42	7.82744e-65	0.324519	0.214	0.087	1.876e-60	restr RPC	ZBTB42
LPIN1	1.01025e-64	0.382717	0.206	0.083	2.42127e-60	restr RPC	LPIN1
ABCG1	2.03853e-64	0.314314	0.397	0.216	4.88574e-60	restr RPC	ABCG1
LOC107051077	5.17486e-64	0.343202	0.469	0.287	1.24026e-59	restr RPC	LOC107051077
TGIF2	2.88653e-63	0.292181	0.228	0.096	6.91814e-59	restr RPC	TGIF2
PFKFB4L	3.14537e-63	0.336944	0.584	0.397	7.5385e-59	restr RPC	PFKFB4L
FBXO39	4.41471e-63	0.301929	0.202	0.081	1.05807e-58	restr RPC	FBXO39
LOC112532547	7.1372e-63	0.266362	0.143	0.045	1.71057e-58	restr RPC	LOC112532547
BTG1	7.17064e-63	0.299883	0.811	0.657	1.71859e-58	restr RPC	BTG1
NUP160	2.77045e-62	0.328807	0.313	0.16	6.63993e-58	restr RPC	NUP160
CALM2	3.6728e-62	0.366383	0.613	0.448	8.8026e-58	restr RPC	CALM2
RNF165	1.4383e-61	0.324738	0.305	0.155	3.44717e-57	restr RPC	RNF165
PRSS56	1.93542e-61	0.287992	0.107	0.027	4.63863e-57	restr RPC	PRSS56
TRAIP	3.57246e-61	0.270645	0.151	0.051	8.56212e-57	restr RPC	TRAIP
KATNA1	3.80015e-61	0.267497	0.158	0.055	9.10782e-57	restr RPC	KATNA1
PPP1R14C	4.74759e-61	0.296701	0.24	0.107	1.13786e-56	restr RPC	PPP1R14C
ACER3	5.2696e-61	0.260812	0.184	0.07	1.26297e-56	restr RPC	ACER3
KAT7	5.72913e-61	0.334104	0.437	0.261	1.3731e-56	restr RPC	KAT7
DYL1	8.5014e-61	0.306256	0.716	0.547	2.03753e-56	restr RPC	DYL1
MRPL57	1.85962e-60	0.305873	0.708	0.535	4.45694e-56	restr RPC	MRPL57
CNTN1	2.51767e-60	0.286222	0.166	0.06	6.03409e-56	restr RPC	CNTN1
TXLNA	2.94679e-60	0.308201	0.283	0.138	7.06258e-56	restr RPC	TXLNA
IPO7	3.18386e-60	0.321857	0.564	0.381	7.63075e-56	restr RPC	IPO7
ARFGAP3	3.68161e-60	0.251514	0.138	0.044	8.82371e-56	restr RPC	ARFGAP3
SAMD13	4.56726e-60	0.263135	0.155	0.053	1.09464e-55	restr RPC	SAMD13
LOC107049632	4.62896e-60	0.308831	0.216	0.093	1.10942e-55	restr RPC	LOC107049632
CCSER1	1.90518e-59	0.313296	0.486	0.296	4.56614e-55	restr RPC	CCSER1
TRIM32	5.43193e-59	0.270339	0.181	0.069	1.30187e-54	restr RPC	TRIM32
MTFR2	5.87971e-59	0.316176	0.258	0.122	1.40919e-54	restr RPC	MTFR2
ID1	6.44899e-59	0.257205	0.204	0.084	1.54563e-54	restr RPC	ID1
CARMIL3	1.1414e-58	0.334365	0.345	0.19	2.73559e-54	restr RPC	CARMIL3
ENTPD6	1.21155e-58	0.256438	0.151	0.052	2.90371e-54	restr RPC	ENTPD6
PPP6R3	1.532e-58	0.324905	0.387	0.223	3.67175e-54	restr RPC	PPP6R3
TMED10	3.10906e-58	0.312806	0.512	0.338	7.45147e-54	restr RPC	TMED10
SCCPDH	8.71281e-58	0.283316	0.22	0.097	2.0882e-53	restr RPC	SCCPDH
TP53BP2	3.8603e-57	0.318021	0.427	0.256	9.25199e-53	restr RPC	TP53BP2
RCBTB1	9.36906e-57	0.307135	0.225	0.102	2.24548e-52	restr RPC	RCBTB1
HRAS	9.62369e-57	0.305393	0.63	0.449	2.30651e-52	restr RPC	HRAS
DDIT4	1.01541e-56	0.533719	0.746	0.621	2.43364e-52	restr RPC	DDIT4
ANTXR2	1.0203e-56	0.280111	0.14	0.047	2.44535e-52	restr RPC	ANTXR2
SNRPE	1.30655e-56	0.300587	0.745	0.612	3.1314e-52	restr RPC	SNRPE
FMC1	6.30474e-56	0.309131	0.635	0.468	1.51106e-51	restr RPC	FMC1
SKA2	1.0058e-55	0.309961	0.35	0.196	2.4106e-51	restr RPC	SKA2
EZH2	1.96582e-55	0.302802	0.278	0.14	4.71147e-51	restr RPC	EZH2
YWHAH	2.82454e-55	0.345425	0.348	0.199	6.76957e-51	restr RPC	YWHAH
RALB	5.09319e-55	0.295155	0.269	0.134	1.22069e-50	restr RPC	RALB
CLTA	5.10019e-55	0.31155	0.329	0.181	1.22236e-50	restr RPC	CLTA
CENPT	7.45597e-55	0.268891	0.183	0.075	1.78697e-50	restr RPC	CENPT
MIS18A	7.65654e-55	0.275144	0.179	0.073	1.83504e-50	restr RPC	MIS18A
ZC3H15	1.88721e-54	0.325634	0.684	0.534	4.52307e-50	restr RPC	ZC3H15
LHX2	3.83422e-54	0.275867	0.167	0.065	9.18949e-50	restr RPC	LHX2
EPHA4	5.8588e-54	0.300592	0.256	0.125	1.40418e-49	restr RPC	EPHA4
HES1	2.98936e-53	0.260517	0.319	0.171	7.1646e-49	restr RPC	HES1
RIF1	6.18124e-53	0.280295	0.178	0.074	1.48146e-48	restr RPC	RIF1
ROCK1	7.92565e-53	0.314972	0.277	0.143	1.89954e-48	restr RPC	ROCK1
ANKRD6	9.55363e-53	0.288321	0.206	0.091	2.28972e-48	restr RPC	ANKRD6
CKAP2L	1.44365e-52	0.271896	0.204	0.089	3.46e-48	restr RPC	CKAP2L
STXBP5	2.19202e-52	0.31574	0.198	0.088	5.2536e-48	restr RPC	STXBP5
ATR	2.47337e-52	0.272387	0.161	0.062	5.92793e-48	restr RPC	ATR
CASK	2.87722e-52	0.304573	0.479	0.31	6.89583e-48	restr RPC	CASK
SPDL1	8.49285e-52	0.269136	0.264	0.131	2.03548e-47	restr RPC	SPDL1
DUT	8.85804e-52	0.274754	0.297	0.158	2.12301e-47	restr RPC	DUT
H2AFY2	2.98838e-51	0.292162	0.313	0.172	7.16226e-47	restr RPC	H2AFY2
PRDX1	6.23726e-51	0.273066	0.781	0.658	1.49489e-46	restr RPC	PRDX1
PHGDH	6.86345e-51	0.286889	0.548	0.377	1.64496e-46	restr RPC	PHGDH
TMEM59L	8.16853e-51	0.276055	0.183	0.078	1.95775e-46	restr RPC	TMEM59L
TM9SF2	1.58194e-50	0.294938	0.3	0.162	3.79144e-46	restr RPC	TM9SF2
HEG1	1.73364e-50	0.256266	0.156	0.061	4.15502e-46	restr RPC	HEG1
LRRFIP1	2.27057e-50	0.353316	0.224	0.107	5.44188e-46	restr RPC	LRRFIP1
VPS26A	4.54961e-50	0.257054	0.17	0.07	1.0904e-45	restr RPC	VPS26A
NDUFAF4	1.16247e-49	0.283966	0.21	0.097	2.78609e-45	restr RPC	NDUFAF4
MYBL2	2.02627e-48	0.274131	0.187	0.083	4.85637e-44	restr RPC	MYBL2
PCNT	6.10651e-48	0.257461	0.274	0.143	1.46355e-43	restr RPC	PCNT
IMPA2	1.10294e-47	0.271926	0.236	0.118	2.64341e-43	restr RPC	IMPA2
CLGN	2.50422e-47	0.263521	0.196	0.09	6.00187e-43	restr RPC	CLGN
ANKRD11	3.66974e-47	0.255352	0.723	0.577	8.79527e-43	restr RPC	ANKRD11
SMAD5	6.53529e-47	0.302524	0.339	0.2	1.56631e-42	restr RPC	SMAD5
DNAJC9	9.74669e-47	0.272076	0.278	0.149	2.33599e-42	restr RPC	DNAJC9
HMCES	1.12012e-46	0.342082	0.359	0.222	2.68459e-42	restr RPC	HMCES
RPA3	1.27019e-46	0.277754	0.285	0.157	3.04427e-42	restr RPC	RPA3
TJP1	1.86503e-46	0.250816	0.235	0.117	4.46992e-42	restr RPC	TJP1
LRCH3	2.54801e-46	0.265846	0.203	0.095	6.10681e-42	restr RPC	LRCH3
SSX2IP	3.12388e-46	0.256883	0.216	0.104	7.48701e-42	restr RPC	SSX2IP
SNRPF	4.87945e-46	0.269812	0.696	0.553	1.16946e-41	restr RPC	SNRPF
CRABP2	1.1209e-44	0.281482	0.158	0.067	2.68647e-40	restr RPC	CRABP2
NUCB2	2.61229e-44	0.272182	0.212	0.105	6.26088e-40	restr RPC	NUCB2
PHLPP1	6.52427e-44	0.267227	0.256	0.137	1.56367e-39	restr RPC	PHLPP1
HMGB3	3.04156e-43	0.299922	0.422	0.278	7.28972e-39	restr RPC	HMGB3
ARL6IP1	4.87939e-43	0.298395	0.401	0.259	1.16944e-38	restr RPC	ARL6IP1
GLDC	1.19744e-42	0.250733	0.221	0.111	2.86991e-38	restr RPC	GLDC
SUMO3	2.18241e-42	0.282924	0.612	0.468	5.23059e-38	restr RPC	SUMO3
PHF6	2.53027e-42	0.250641	0.278	0.155	6.0643e-38	restr RPC	PHF6
HIST1H103	3.64036e-42	0.500076	0.721	0.649	8.72484e-38	restr RPC	HIST1H103
BAZ1B	4.24082e-42	0.299522	0.415	0.272	1.0164e-37	restr RPC	BAZ1B
C1orf53	4.39962e-42	0.260966	0.181	0.085	1.05446e-37	restr RPC	C1orf53
MESDC1	6.22225e-42	0.284818	0.339	0.206	1.49129e-37	restr RPC	MESDC1
LOC107052649	2.16129e-41	0.256584	0.416	0.267	5.17996e-37	restr RPC	LOC107052649
SOD1	1.58741e-40	0.251223	0.433	0.286	3.80455e-36	restr RPC	SOD1
P4HB	2.15475e-40	0.322044	0.359	0.228	5.16428e-36	restr RPC	P4HB
HSTH2B7	5.29024e-40	0.259153	0.152	0.066	1.26791e-35	restr RPC	HSTH2B7
ZIC2	8.26068e-38	0.257298	0.571	0.418	1.97984e-33	restr RPC	ZIC2
WHSC1	9.5395e-38	0.256825	0.37	0.237	2.28633e-33	restr RPC	WHSC1
RAX2	1.25049e-37	0.273018	0.269	0.155	2.99706e-33	restr RPC	RAX2
DNAJC2	3.98467e-37	0.261629	0.337	0.214	9.55005e-33	restr RPC	DNAJC2
DARS	1.51468e-36	0.25054	0.309	0.189	3.63024e-32	restr RPC	DARS
NDUFV2	6.38718e-36	0.255697	0.42	0.284	1.53081e-31	restr RPC	NDUFV2
SIVA1	1.53272e-35	0.259862	0.486	0.35	3.67346e-31	restr RPC	SIVA1
AGFG1	2.95363e-35	0.274291	0.316	0.199	7.07896e-31	restr RPC	AGFG1
CLIC4	1.50262e-34	0.253907	0.382	0.255	3.60132e-30	restr RPC	CLIC4
SRPK1	4.57244e-34	0.258557	0.338	0.216	1.09588e-29	restr RPC	SRPK1
ZEB1	4.71356e-32	0.265685	0.252	0.152	1.1297e-27	restr RPC	ZEB1
HISTH1	9.51664e-32	0.26895	0.241	0.142	2.28085e-27	restr RPC	HISTH1
NDUFC2	2.43393e-31	0.278838	0.725	0.62	5.83341e-27	restr RPC	NDUFC2

## Sheet: cone PR1
	p_val	avg_logFC	pct.1	pct.2	p_val_adj	cluster	gene
B3GAT22	0	2.01075	0.743	0.072	0	cone PR1	B3GAT2
DIO2	0	1.74323	0.525	0.023	0	cone PR1	DIO2
AHR1B2	0	1.41674	0.639	0.166	0	cone PR1	AHR1B
RBP42	0	1.3485	0.955	0.283	0	cone PR1	RBP4
NFIB	0	1.303	0.261	0.009	0	cone PR1	NFIB
LOC1070503282	0	1.27795	0.544	0.096	0	cone PR1	LOC107050328
FSCN22	0	1.25789	0.483	0.079	0	cone PR1	FSCN2
UST2	2.41883e-266	1.06965	0.392	0.06	5.79721e-262	cone PR1	UST
OTX2	2.22202e-247	0.902879	0.988	0.586	5.32551e-243	cone PR1	OTX2
RELN	6.0446e-231	0.797856	0.19	0.01	1.44871e-226	cone PR1	RELN
CA101	2.30747e-230	1.10099	0.367	0.061	5.53032e-226	cone PR1	CA10
DSCAM	3.11763e-228	0.922164	0.179	0.009	7.47202e-224	cone PR1	DSCAM
PLCH22	7.68609e-223	1.08161	0.479	0.115	1.84213e-218	cone PR1	PLCH2
CLMN1	4.37141e-197	1.2093	0.485	0.136	1.0477e-192	cone PR1	CLMN
NRN1L2	1.48151e-194	1.10671	0.524	0.152	3.55074e-190	cone PR1	NRN1L
EVX2	2.463e-179	0.679757	0.149	0.008	5.90307e-175	cone PR1	EVX2
TRHDE	1.82397e-178	1.14652	0.471	0.138	4.37151e-174	cone PR1	TRHDE
PRDM12	3.39695e-176	0.997609	0.577	0.199	8.14147e-172	cone PR1	PRDM1
SNTG1	1.91584e-174	0.757188	0.197	0.019	4.59169e-170	cone PR1	SNTG1
NHSL11	2.60463e-174	1.0248	0.641	0.271	6.24253e-170	cone PR1	NHSL1
IMPG1	1.23294e-173	0.555371	0.126	0.005	2.95498e-169	cone PR1	IMPG1
SGK1	5.35137e-173	0.814	0.229	0.028	1.28256e-168	cone PR1	SGK1
GPC22	2.65806e-170	0.9391	0.412	0.104	6.37058e-166	cone PR1	GPC2
ARNT2	3.86772e-166	1.02604	0.459	0.14	9.26977e-162	cone PR1	ARNT2
GNG13	2.4972e-165	0.94674	0.297	0.052	5.98505e-161	cone PR1	GNG13
SLA2	1.89054e-155	0.557305	0.14	0.009	4.53106e-151	cone PR1	SLA2
STARD13	2.51065e-151	0.816641	0.257	0.043	6.01728e-147	cone PR1	STARD13
NPDC11	4.85845e-148	0.912135	0.632	0.286	1.16442e-143	cone PR1	NPDC1
COL18A12	7.70703e-144	0.967138	0.483	0.173	1.84714e-139	cone PR1	COL18A1
LOC1017490162	2.64423e-142	0.873569	0.675	0.315	6.33742e-138	cone PR1	LOC101749016
UNC1191	2.61081e-140	0.930989	0.532	0.211	6.25732e-136	cone PR1	UNC119
IMPG22	1.1169e-131	0.769988	0.435	0.132	2.67688e-127	cone PR1	IMPG2
MRAS1	3.09637e-129	0.97904	0.499	0.197	7.42106e-125	cone PR1	MRAS
BTG21	1.0147e-124	0.876205	0.595	0.283	2.43192e-120	cone PR1	BTG2
PIBPPDD4L2	4.1276e-121	0.774458	0.587	0.267	9.89262e-117	cone PR1	PIBPPDD4L
STAT5B1	6.88422e-121	0.794062	0.311	0.081	1.64994e-116	cone PR1	STAT5B
ALDOC1	1.07608e-119	0.64239	0.901	0.699	2.57904e-115	cone PR1	ALDOC
TBX21	5.35657e-116	0.965718	0.416	0.151	1.28381e-111	cone PR1	TBX2
ZNF804B1	2.66897e-113	0.763321	0.268	0.062	6.39671e-109	cone PR1	ZNF804B
INSM21	2.96555e-111	0.800527	0.727	0.435	7.10752e-107	cone PR1	INSM2
ATP11A2	4.48672e-108	0.850803	0.366	0.119	1.07533e-103	cone PR1	ATP11A
P3H3	1.04062e-105	0.699648	0.183	0.031	2.49405e-101	cone PR1	P3H3
LRFN3	9.9468e-104	0.864487	0.473	0.207	2.38395e-99	cone PR1	LRFN3
NEK61	2.8581e-102	0.716594	0.331	0.103	6.85001e-98	cone PR1	NEK6
CBFA2T31	3.25736e-100	0.711639	0.543	0.244	7.80691e-96	cone PR1	CBFA2T3
DTNBP11	1.76328e-99	0.772702	0.281	0.078	4.22606e-95	cone PR1	DTNBP1
ADAMTS32	1.0214e-98	0.835666	0.459	0.189	2.44798e-94	cone PR1	ADAMTS3
GRIK11	1.06336e-94	0.762164	0.243	0.061	2.54857e-90	cone PR1	GRIK1
FAM53B2	5.38427e-94	0.733938	0.569	0.285	1.29045e-89	cone PR1	FAM53B
PCBP41	2.91331e-93	0.657212	0.695	0.448	6.98233e-89	cone PR1	PCBP4
KIAA0556	1.01456e-92	0.655392	0.228	0.054	2.4316e-88	cone PR1	KIAA0556
NACAD1	2.0258e-92	0.823127	0.521	0.258	4.85523e-88	cone PR1	NACAD
PNRC11	1.10371e-91	0.473839	0.958	0.908	2.64525e-87	cone PR1	PNRC1
MAP22	1.13148e-90	0.553679	0.846	0.619	2.71181e-86	cone PR1	MAP2
SFMBT21	1.31584e-90	0.730243	0.273	0.078	3.15366e-86	cone PR1	SFMBT2
CDC42BPB1	3.21811e-90	0.728086	0.679	0.447	7.71285e-86	cone PR1	CDC42BPB
RXRG2	1.2086e-89	0.391585	0.57	0.232	2.89666e-85	cone PR1	RXRG
LOC107052682	8.18124e-89	0.561982	0.145	0.022	1.9608e-84	cone PR1	LOC107052682
GREB1L1	2.04647e-88	0.713398	0.301	0.095	4.90478e-84	cone PR1	GREB1L
CA22	2.93506e-88	0.953063	0.503	0.247	7.03446e-84	cone PR1	CA2
RPS26	3.44757e-88	0.27526	0.999	0.995	8.26278e-84	cone PR1	RPS26
SEPW11	6.67892e-88	0.579024	0.837	0.71	1.60074e-83	cone PR1	SEPW1
RTN4RL12	7.50638e-88	0.777716	0.275	0.079	1.79905e-83	cone PR1	RTN4RL1
RALGPS2	5.9265e-86	0.747915	0.585	0.34	1.4204e-81	cone PR1	RALGPS2
GTF2IRD11	1.11182e-83	0.769004	0.421	0.187	2.6647e-79	cone PR1	GTF2IRD1
CLSTN12	5.05888e-83	0.6313	0.816	0.63	1.21246e-78	cone PR1	CLSTN1
BTG12	1.54366e-82	0.577733	0.833	0.684	3.6997e-78	cone PR1	BTG1
SLC4A41	5.74821e-82	0.722879	0.249	0.071	1.37767e-77	cone PR1	SLC4A4
NDUFA101	1.47375e-80	0.697506	0.625	0.418	3.53213e-76	cone PR1	NDUFA10
ANKRD33B	3.31749e-79	0.535037	0.161	0.031	7.95102e-75	cone PR1	ANKRD33B
RPS19	7.70931e-79	0.264811	0.999	0.998	1.84769e-74	cone PR1	RPS19
PKIB	9.74308e-78	0.523497	0.136	0.023	2.33512e-73	cone PR1	PKIB
CDH22	5.36006e-76	0.450584	0.126	0.019	1.28465e-71	cone PR1	CDH22
FSTL51	7.0446e-74	0.608864	0.564	0.313	1.68838e-69	cone PR1	FSTL5
PYGL2	1.05971e-73	0.658557	0.263	0.084	2.53981e-69	cone PR1	PYGL
TACC2	5.09665e-73	0.693491	0.425	0.2	1.22151e-68	cone PR1	TACC2
HIP11	6.287e-73	0.655196	0.408	0.187	1.5068e-68	cone PR1	HIP1
GPM6B2	2.28213e-72	0.631362	0.647	0.422	5.46958e-68	cone PR1	GPM6B
ACTG2	1.06736e-71	0.494334	0.129	0.022	2.55815e-67	cone PR1	ACTG2
RPS25	5.6218e-71	0.306571	0.991	0.99	1.34738e-66	cone PR1	RPS25
DIXDC12	8.31655e-71	0.685748	0.414	0.196	1.99323e-66	cone PR1	DIXDC1
TTC8	1.97808e-70	0.648023	0.294	0.106	4.74087e-66	cone PR1	TTC8
CASZ12	9.96842e-69	0.682037	0.41	0.192	2.38913e-64	cone PR1	CASZ1
NFASC1	5.08259e-68	0.616364	0.547	0.307	1.21814e-63	cone PR1	NFASC
12S_ribosomal_RNA	3.88493e-67	0.594558	0.922	0.842	9.311e-63	cone PR1	12S_ribosomal_RNA
EML51	1.21212e-66	0.6229	0.289	0.105	2.90508e-62	cone PR1	EML5
LOC107053185	1.05823e-65	0.564921	0.191	0.05	2.53626e-61	cone PR1	LOC107053185
CLSTN31	1.37611e-65	0.661606	0.312	0.125	3.29812e-61	cone PR1	CLSTN3
KCNK3	4.53175e-64	0.574351	0.192	0.052	1.08613e-59	cone PR1	KCNK3
RFX5	5.15983e-62	0.615961	0.215	0.067	1.23666e-57	cone PR1	RFX5
LHX4	3.82308e-61	0.439173	0.131	0.026	9.16277e-57	cone PR1	LHX4
SMAP1	2.34294e-60	0.791745	0.417	0.229	5.61532e-56	cone PR1	SMAP1
MTUS1	2.05347e-58	0.470691	0.165	0.043	4.92155e-54	cone PR1	MTUS1
TUBGCP5	1.99535e-57	0.688	0.291	0.121	4.78226e-53	cone PR1	TUBGCP5
NR2E31	5.82522e-57	0.572477	0.217	0.07	1.39613e-52	cone PR1	NR2E3
CNKSR2	5.32913e-56	0.404548	0.13	0.028	1.27723e-51	cone PR1	CNKSR2
ZNF804A	5.28e-55	0.687706	0.249	0.094	1.26546e-50	cone PR1	ZNF804A
PCBP32	1.37685e-54	0.407706	0.633	0.417	3.29989e-50	cone PR1	PCBP3
GDPD5	3.70509e-54	0.540343	0.278	0.112	8.87999e-50	cone PR1	GDPD5
CD5	5.08062e-54	0.334429	0.102	0.018	1.21767e-49	cone PR1	CD5
RGCC2	5.79217e-54	0.585802	0.29	0.12	1.38821e-49	cone PR1	RGCC
NTNG2	1.30168e-53	0.461172	0.158	0.042	3.11973e-49	cone PR1	NTNG2
16S_ribosomal_RNA	2.93027e-53	0.416351	0.94	0.877	7.02297e-49	cone PR1	16S_ribosomal_RNA
MEIS21	3.26752e-52	0.694693	0.477	0.284	7.83128e-48	cone PR1	MEIS2
KCNH6	1.08029e-50	0.57672	0.183	0.056	2.58913e-46	cone PR1	KCNH6
MSMO12	1.96211e-50	0.628353	0.433	0.245	4.70259e-46	cone PR1	MSMO1
MAP4K41	4.43244e-50	0.428379	0.849	0.747	1.06232e-45	cone PR1	MAP4K4
DCTN11	5.05261e-50	0.568167	0.545	0.374	1.21096e-45	cone PR1	DCTN1
CHGA1	6.3906e-50	0.346564	0.394	0.198	1.53163e-45	cone PR1	CHGA
CCSER12	6.55291e-50	0.569114	0.524	0.33	1.57054e-45	cone PR1	CCSER1
PAQR9	6.76937e-50	0.629431	0.424	0.245	1.62242e-45	cone PR1	PAQR9
LOC1070562751	1.15608e-49	0.575878	0.253	0.101	2.77078e-45	cone PR1	LOC107056275
NXNL1	7.90504e-49	0.346778	0.102	0.02	1.8946e-44	cone PR1	NXNL1
ACKR31	1.71784e-47	0.540268	0.234	0.091	4.11714e-43	cone PR1	ACKR3
LOC107057310	1.75641e-46	0.39415	0.12	0.029	4.20958e-42	cone PR1	LOC107057310
YBX31	2.08151e-46	0.525001	0.565	0.386	4.98875e-42	cone PR1	YBX3
PLPP31	2.50826e-46	0.575517	0.276	0.123	6.01154e-42	cone PR1	PLPP3
GPX41	1.1733e-45	0.470495	0.688	0.557	2.81206e-41	cone PR1	GPX4
COPS91	4.80667e-45	0.421295	0.803	0.746	1.15202e-40	cone PR1	COPS9
MAP1A	2.3546e-44	0.517946	0.579	0.416	5.64327e-40	cone PR1	MAP1A
ABCG41	3.52609e-44	0.581624	0.273	0.121	8.45098e-40	cone PR1	ABCG4
RASSF82	1.69382e-43	0.587836	0.234	0.096	4.05957e-39	cone PR1	RASSF8
SOWAHC	2.12255e-43	0.507134	0.194	0.071	5.08712e-39	cone PR1	SOWAHC
SREBF21	4.21375e-43	0.494961	0.584	0.424	1.00991e-38	cone PR1	SREBF2
SMAD72	1.05389e-42	0.598044	0.349	0.184	2.52586e-38	cone PR1	SMAD7
CPE	4.23841e-42	0.490407	0.667	0.518	1.01582e-37	cone PR1	CPE
ATP5G32	1.03975e-41	0.747004	0.793	0.766	2.49198e-37	cone PR1	ATP5G3
LOC1017521062	1.15954e-41	0.472899	0.24	0.098	2.77906e-37	cone PR1	LOC101752106
ENO2	5.90772e-41	0.54727	0.258	0.116	1.4159e-36	cone PR1	ENO2
AGAP11	1.19167e-40	0.546827	0.525	0.371	2.85607e-36	cone PR1	AGAP1
CKMT1A1	1.90675e-40	0.485243	0.358	0.194	4.5699e-36	cone PR1	CKMT1A
TP53INP11	3.20718e-40	0.511387	0.288	0.139	7.68664e-36	cone PR1	TP53INP1
PTPN132	3.40759e-40	0.503051	0.197	0.075	8.16698e-36	cone PR1	PTPN13
AK12	7.30548e-40	0.536214	0.433	0.281	1.7509e-35	cone PR1	AK1
NLK1	9.66352e-40	0.586845	0.34	0.186	2.31606e-35	cone PR1	NLK
TPI11	3.12311e-37	0.423729	0.656	0.536	7.48517e-33	cone PR1	TPI1
TRIP12	3.64554e-37	0.53974	0.335	0.186	8.73727e-33	cone PR1	TRIP12
RGS121	5.10727e-36	0.526637	0.24	0.109	1.22406e-31	cone PR1	RGS12
SMAD2Z	4.27565e-35	0.520682	0.194	0.08	1.02475e-30	cone PR1	SMAD2Z
DIRAS1	4.28644e-35	0.423929	0.168	0.063	1.02733e-30	cone PR1	DIRAS1
IQSEC31	5.77879e-35	0.491235	0.226	0.101	1.385e-30	cone PR1	IQSEC3
KIAA11071	1.61729e-34	0.519603	0.383	0.234	3.87616e-30	cone PR1	KIAA1107
MAN2B2	3.48993e-34	0.37299	0.146	0.05	8.36431e-30	cone PR1	MAN2B2
ETV1	3.91109e-34	0.415788	0.105	0.029	9.37371e-30	cone PR1	ETV1
MYCL	4.10998e-33	0.494319	0.305	0.167	9.8504e-29	cone PR1	MYCL
LRRC75A	9.07557e-33	0.448161	0.181	0.074	2.17514e-28	cone PR1	LRRC75A
PGM2L11	1.16058e-32	0.489428	0.34	0.199	2.78156e-28	cone PR1	PGM2L1
LINGO2	3.17556e-32	0.425101	0.146	0.052	7.61087e-28	cone PR1	LINGO2
AES1	7.55618e-32	0.443337	0.441	0.297	1.81099e-27	cone PR1	AES
AGFG12	9.94125e-32	0.477431	0.358	0.217	2.38262e-27	cone PR1	AGFG1
SLC24A3	1.90193e-31	0.411692	0.178	0.073	4.55835e-27	cone PR1	SLC24A3
KLHL351	5.7788e-31	0.424098	0.426	0.274	1.385e-26	cone PR1	KLHL35
BSG2	5.92314e-31	0.444849	0.564	0.445	1.4196e-26	cone PR1	BSG
TMEM132A1	2.32649e-30	0.446101	0.372	0.232	5.57589e-26	cone PR1	TMEM132A
TLE2L	2.96327e-29	0.359771	0.122	0.041	7.10207e-25	cone PR1	TLE2L
AMER21	3.57802e-29	0.322187	0.753	0.659	8.57545e-25	cone PR1	AMER2
MTA3	6.21139e-29	0.389635	0.162	0.066	1.48868e-24	cone PR1	MTA3
RTN4RL21	6.2146e-29	0.417885	0.271	0.144	1.48945e-24	cone PR1	RTN4RL2
DSEL	9.74594e-29	0.424112	0.131	0.047	2.33581e-24	cone PR1	DSEL
SRRM41	1.96653e-28	0.307661	0.714	0.599	4.71317e-24	cone PR1	SRRM4
ITGA111	3.63481e-28	0.385543	0.193	0.087	8.71155e-24	cone PR1	ITGA11
LOC415324	4.6949e-28	0.342169	0.103	0.032	1.12523e-23	cone PR1	LOC415324
BAZ1A1	1.90802e-27	0.381592	0.589	0.477	4.57295e-23	cone PR1	BAZ1A
LOC101749175	6.10345e-27	0.370161	0.118	0.041	1.46281e-22	cone PR1	LOC101749175
ARL4A2	7.06136e-27	0.495548	0.338	0.213	1.6924e-22	cone PR1	ARL4A
SYT111	8.2272e-27	0.411002	0.524	0.408	1.97181e-22	cone PR1	SYT11
CDH121	9.3182e-27	0.497849	0.301	0.18	2.23329e-22	cone PR1	CDH12
LOC107056270	1.18518e-26	0.467922	0.459	0.331	2.84051e-22	cone PR1	LOC107056270
NKAIN12	1.45242e-26	0.431773	0.242	0.127	3.48101e-22	cone PR1	NKAIN1
RAPGEF51	2.76266e-26	0.380352	0.182	0.082	6.62127e-22	cone PR1	RAPGEF5
SLC16A6	3.86363e-26	0.367384	0.117	0.041	9.25995e-22	cone PR1	SLC16A6
ZIC31	6.33832e-26	0.527865	0.209	0.104	1.51911e-21	cone PR1	ZIC3
NEUROD1	7.47508e-26	0.437463	0.222	0.112	1.79155e-21	cone PR1	NEUROD1
SHANK32	2.55702e-25	0.377415	0.301	0.175	6.12841e-21	cone PR1	SHANK3
SLC43A3	3.13386e-25	0.420708	0.26	0.145	7.51093e-21	cone PR1	SLC43A3
SAT11	3.43342e-25	0.473593	0.349	0.228	8.22888e-21	cone PR1	SAT1
HCN2	4.80083e-25	0.361534	0.122	0.046	1.15061e-20	cone PR1	HCN2
SNX6	8.29698e-25	0.486649	0.347	0.231	1.98854e-20	cone PR1	SNX6
ENC1	8.30565e-25	0.456055	0.227	0.12	1.99062e-20	cone PR1	ENC1
REPS2	9.99644e-25	0.370858	0.152	0.065	2.39585e-20	cone PR1	REPS2
SAMD72	1.22765e-24	0.391367	0.192	0.09	2.94231e-20	cone PR1	SAMD7
PDE6B	1.52893e-24	0.32788	0.104	0.035	3.66439e-20	cone PR1	PDE6B
GRIA21	1.85812e-24	0.513701	0.226	0.119	4.45336e-20	cone PR1	GRIA2
KBTBD112	4.28638e-24	0.458572	0.296	0.18	1.02732e-19	cone PR1	KBTBD11
AUTS2	1.52765e-23	0.518589	0.318	0.207	3.66133e-19	cone PR1	AUTS2
CADM11	1.53945e-23	0.344671	0.652	0.564	3.6896e-19	cone PR1	CADM1
ZNF5161	5.49846e-23	0.445887	0.401	0.29	1.31782e-18	cone PR1	ZNF516
TLE1L	7.31892e-23	0.305853	0.13	0.052	1.75413e-18	cone PR1	TLE1L
WIPI1	3.79503e-22	0.465757	0.351	0.242	9.09555e-18	cone PR1	WIPI1
GADD45A2	1.14683e-21	0.279048	0.656	0.559	2.7486e-17	cone PR1	GADD45A
HTRA11	1.32165e-21	0.403408	0.258	0.15	3.16759e-17	cone PR1	HTRA1
HMGCR1	1.64348e-21	0.462336	0.524	0.438	3.93892e-17	cone PR1	HMGCR
PHLDA11	6.73209e-21	0.320504	0.448	0.326	1.61348e-16	cone PR1	PHLDA1
CORO2B1	1.11457e-20	0.392078	0.343	0.23	2.6713e-16	cone PR1	CORO2B
SELENOI	1.18981e-20	0.369387	0.262	0.157	2.85161e-16	cone PR1	SELENOI
LIMD21	1.86498e-20	0.416545	0.302	0.196	4.4698e-16	cone PR1	LIMD2
LOC112531520	1.91805e-20	0.325165	0.125	0.052	4.59699e-16	cone PR1	LOC112531520
CHD7	2.84375e-20	0.298411	0.725	0.683	6.81561e-16	cone PR1	CHD7
MSI1	3.04937e-20	0.379587	0.476	0.386	7.30843e-16	cone PR1	MSI1
WSCD2	3.32068e-20	0.353179	0.167	0.082	7.95869e-16	cone PR1	WSCD2
SPTBN21	4.53588e-20	0.347318	0.273	0.167	1.08711e-15	cone PR1	SPTBN2
EIF3G	1.4482e-19	0.306552	0.63	0.574	3.47089e-15	cone PR1	EIF3G
IPMK	1.72345e-19	0.471963	0.233	0.14	4.13059e-15	cone PR1	IPMK
ABCG11	2.0265e-19	0.396412	0.361	0.255	4.85691e-15	cone PR1	ABCG1
CKAP41	2.36414e-19	0.419038	0.328	0.227	5.66615e-15	cone PR1	CKAP4
LOC112530071	2.9785e-19	0.373596	0.134	0.061	7.13857e-15	cone PR1	LOC112530071
FOXO3	4.91304e-19	0.385985	0.321	0.218	1.17751e-14	cone PR1	FOXO3
DOT1L1	5.59339e-19	0.391779	0.342	0.241	1.34057e-14	cone PR1	DOT1L
MXD4	8.03549e-19	0.385554	0.209	0.118	1.92586e-14	cone PR1	MXD4
SV2B	1.01336e-18	0.418008	0.295	0.196	2.42872e-14	cone PR1	SV2B
ABCC5	1.73936e-18	0.413833	0.16	0.082	4.16871e-14	cone PR1	ABCC5
TWF11	2.04108e-18	0.351033	0.21	0.118	4.89186e-14	cone PR1	TWF1
SYNE2	7.14738e-18	0.463152	0.441	0.362	1.71301e-13	cone PR1	SYNE2
FAM53A	7.2983e-18	0.405591	0.233	0.143	1.74918e-13	cone PR1	FAM53A
BCL21	7.44588e-18	0.440957	0.389	0.3	1.78455e-13	cone PR1	BCL2
2019-03-08	1.10234e-17	0.330806	0.167	0.087	2.64198e-13	cone PR1	2019-03-08
COCH1	1.14424e-17	0.314464	0.186	0.1	2.74241e-13	cone PR1	COCH
TMBIM4	1.36864e-17	0.342632	0.136	0.065	3.28021e-13	cone PR1	TMBIM4
LOC1125333621	2.96742e-17	0.37253	0.183	0.101	7.11202e-13	cone PR1	LOC112533362
LRRC3C2	3.94215e-17	0.328887	0.344	0.24	9.44814e-13	cone PR1	LRRC3C
EIF3F	1.09683e-16	0.285757	0.624	0.586	2.62877e-12	cone PR1	EIF3F
TPRG1L	2.19483e-16	0.361005	0.204	0.119	5.26036e-12	cone PR1	TPRG1L
GLO1	2.84867e-16	0.289972	0.531	0.462	6.82742e-12	cone PR1	GLO1
PIK3R31	3.45281e-16	0.410811	0.359	0.27	8.27534e-12	cone PR1	PIK3R3
FDPS1	4.92962e-16	0.387869	0.401	0.316	1.18148e-11	cone PR1	FDPS
NRXN12	5.40318e-16	0.421878	0.321	0.223	1.29498e-11	cone PR1	NRXN1
DACH11	8.34533e-16	0.362305	0.283	0.192	2.00013e-11	cone PR1	DACH1
ZDHHC5	1.08753e-15	0.277534	0.114	0.052	2.60648e-11	cone PR1	ZDHHC5
YPEL5	1.88317e-15	0.390214	0.365	0.282	4.5134e-11	cone PR1	YPEL5
ZBTB20	2.15204e-15	0.436741	0.438	0.362	5.1578e-11	cone PR1	ZBTB20
EIF3M	2.97039e-15	0.281362	0.614	0.574	7.11914e-11	cone PR1	EIF3M
LDB2	9.88998e-15	0.250894	0.108	0.049	2.37033e-10	cone PR1	LDB2
PLEKHG51	1.09273e-14	0.32358	0.166	0.092	2.61896e-10	cone PR1	PLEKHG5
TDP1	2.74324e-14	0.389113	0.161	0.091	6.57473e-10	cone PR1	TDP1
TCP11L2	3.08671e-14	0.311422	0.147	0.078	7.39792e-10	cone PR1	TCP11L2
PDE3A	3.18487e-14	0.298536	0.128	0.064	7.63318e-10	cone PR1	PDE3A
SFXN31	4.13028e-14	0.327105	0.203	0.124	9.89903e-10	cone PR1	SFXN3
PSD	6.72313e-14	0.357377	0.304	0.22	1.61133e-09	cone PR1	PSD
LOC107053770	7.7253e-14	0.286954	0.162	0.091	1.85152e-09	cone PR1	LOC107053770
GSE12	9.04784e-14	0.257967	0.561	0.483	2.1685e-09	cone PR1	GSE1
SPTSSA	1.17148e-13	0.32538	0.211	0.134	2.80769e-09	cone PR1	SPTSSA
GABARAPL1	1.40826e-13	0.39872	0.286	0.209	3.37518e-09	cone PR1	GABARAPL1
ANKRD31	1.42671e-13	0.372988	0.179	0.107	3.4194e-09	cone PR1	ANKRD31
ZFAND3	1.92868e-13	0.326116	0.233	0.155	4.62248e-09	cone PR1	ZFAND3
C1orf167	2.64181e-13	0.288887	0.116	0.058	6.33161e-09	cone PR1	C1orf167
SEMA7A	3.86529e-13	0.272399	0.103	0.049	9.26394e-09	cone PR1	SEMA7A
RASSF21	8.41918e-13	0.370139	0.275	0.195	2.01782e-08	cone PR1	RASSF2
MPP61	8.68679e-13	0.335603	0.215	0.141	2.08196e-08	cone PR1	MPP6
C1H21ORF91	1.1614e-12	0.312501	0.17	0.102	2.78354e-08	cone PR1	C1H21ORF91
CDH2	1.19711e-12	0.370456	0.391	0.322	2.86912e-08	cone PR1	CDH2
RSBN1L	1.21346e-12	0.351897	0.367	0.299	2.9083e-08	cone PR1	RSBN1L
CHST2	1.51655e-12	0.322609	0.196	0.125	3.63471e-08	cone PR1	CHST2
SMARCA4	3.97608e-12	0.307885	0.379	0.309	9.52948e-08	cone PR1	SMARCA4
SH3BP4	6.1751e-12	0.266694	0.116	0.061	1.47999e-07	cone PR1	SH3BP4
C9H3orf581	6.24507e-12	0.339392	0.328	0.25	1.49676e-07	cone PR1	C9H3orf58
IDH2	7.01403e-12	0.30274	0.357	0.286	1.68105e-07	cone PR1	IDH2
RDH5	8.35091e-12	0.273368	0.101	0.05	2.00146e-07	cone PR1	RDH5
RGS32	1.03915e-11	0.344712	0.383	0.305	2.49054e-07	cone PR1	RGS3
KRAS2	1.68934e-11	0.297573	0.452	0.387	4.04884e-07	cone PR1	KRAS
RAI21	1.89701e-11	0.278457	0.138	0.078	4.54656e-07	cone PR1	RAI2
UBE2L61	2.10622e-11	0.283221	0.17	0.106	5.04798e-07	cone PR1	UBE2L6
LOC1070503351	2.94236e-11	0.295684	0.159	0.096	7.05195e-07	cone PR1	LOC107050335
QSOX22	4.01274e-11	0.33575	0.249	0.178	9.61734e-07	cone PR1	QSOX2
CUEDC1	1.09996e-10	0.278979	0.134	0.078	2.63627e-06	cone PR1	CUEDC1
IDI11	1.12305e-10	0.342068	0.241	0.171	2.69163e-06	cone PR1	IDI1
LOC417113	1.40857e-10	0.302733	0.444	0.386	3.37591e-06	cone PR1	LOC417113
FAM214A	3.42558e-10	0.292965	0.22	0.155	8.21009e-06	cone PR1	FAM214A
RAP1GDS1	5.56402e-10	0.298139	0.186	0.126	1.33353e-05	cone PR1	RAP1GDS1
ARHGEF11	8.87582e-10	0.326452	0.141	0.087	2.12727e-05	cone PR1	ARHGEF11
HSD17B7	1.70531e-09	0.252183	0.116	0.066	4.08711e-05	cone PR1	HSD17B7
PCDHGC32	1.74142e-09	0.323716	0.3	0.24	4.17365e-05	cone PR1	PCDHGC3
SH3KBP11	1.94984e-09	0.282399	0.237	0.175	4.67319e-05	cone PR1	SH3KBP1
SPOCK3	2.1113e-09	0.301892	0.41	0.361	5.06015e-05	cone PR1	SPOCK3
CDK2AP2	2.38741e-09	0.271802	0.44	0.398	5.7219e-05	cone PR1	CDK2AP2
FASN1	2.88966e-09	0.293639	0.465	0.435	6.92564e-05	cone PR1	FASN
LOC1008590721	3.20656e-09	0.293311	0.201	0.14	7.68516e-05	cone PR1	LOC100859072
PLXNB2	3.84764e-09	0.264553	0.109	0.062	9.22164e-05	cone PR1	PLXNB2
GOT1	3.85402e-09	0.349784	0.307	0.253	9.23692e-05	cone PR1	GOT1
C15H12orf43	5.28684e-09	0.276157	0.13	0.079	0.00012671	cone PR1	C15H12orf43
RIMS1	1.0334e-08	0.253555	0.11	0.064	0.000247675	cone PR1	RIMS1
AP3B21	1.11407e-08	0.320928	0.16	0.106	0.00026701	cone PR1	AP3B2
PSMC6	1.14402e-08	0.266748	0.346	0.293	0.000274187	cone PR1	PSMC6
RBP51	1.35209e-08	0.264833	0.288	0.226	0.000324055	cone PR1	RBP5
PLCG1	2.36437e-08	0.267464	0.349	0.294	0.000566669	cone PR1	PLCG1
KCNN11	2.60655e-08	0.299697	0.304	0.247	0.000624712	cone PR1	KCNN1
TSPAN72	3.29821e-08	0.289177	0.433	0.399	0.000790483	cone PR1	TSPAN7
SLC12A21	3.4737e-08	0.272337	0.23	0.17	0.000832541	cone PR1	SLC12A2
TNFRSF211	3.59945e-08	0.254333	0.203	0.146	0.000862681	cone PR1	TNFRSF21
FDFT1	3.73982e-08	0.342996	0.28	0.223	0.000896324	cone PR1	FDFT1
CZH9ORF40	8.37529e-08	0.282467	0.19	0.137	0.00200731	cone PR1	CZH9ORF40
YPEL2	9.45479e-08	0.25166	0.11	0.067	0.00226603	cone PR1	YPEL2
LOC112530098	1.2629e-07	0.311486	0.127	0.081	0.00302679	cone PR1	LOC112530098
PTPRO2	1.35915e-07	0.253295	0.235	0.179	0.00325748	cone PR1	PTPRO
NRIP1	1.36025e-07	0.264414	0.371	0.32	0.00326011	cone PR1	NRIP1
CCND2	1.6824e-07	0.269091	0.155	0.107	0.00403221	cone PR1	CCND2
CYP51A11	1.79065e-07	0.305194	0.299	0.247	0.00429165	cone PR1	CYP51A1
TMEM198	1.96124e-07	0.273595	0.409	0.373	0.00470049	cone PR1	TMEM198
TRNAU1AP	2.09591e-07	0.288023	0.436	0.4	0.00502326	cone PR1	TRNAU1AP
SNRNP25	2.63932e-07	0.258958	0.346	0.305	0.00632565	cone PR1	SNRNP25
SYNGR11	2.71369e-07	0.273916	0.262	0.21	0.00650389	cone PR1	SYNGR1
SLC1A4	3.51121e-07	0.251791	0.232	0.18	0.00841532	cone PR1	SLC1A4
RAB39B1	3.87621e-07	0.314353	0.236	0.19	0.00929012	cone PR1	RAB39B
DNAJB2	5.54056e-07	0.267259	0.24	0.191	0.0132791	cone PR1	DNAJB2
NR2F11	5.93832e-07	0.366377	0.355	0.312	0.0142324	cone PR1	NR2F1
GLDC1	2.37963e-06	0.252352	0.182	0.136	0.0570326	cone PR1	GLDC
LOC107050721	3.78643e-06	0.264657	0.176	0.132	0.0907494	cone PR1	LOC107050721
ALAS1	5.1483e-06	0.25596	0.225	0.179	0.123389	cone PR1	ALAS1
MFAP3L	6.22779e-06	0.275828	0.165	0.122	0.149261	cone PR1	MFAP3L
MXRA72	8.97432e-06	0.263651	0.21	0.165	0.215087	cone PR1	MXRA7
VASH1	2.55535e-05	0.266209	0.274	0.24	0.61244	cone PR1	VASH1
TMEM237	2.71301e-05	0.266056	0.179	0.14	0.650227	cone PR1	TMEM237
TEAD1	0.000122393	0.287142	0.251	0.219	1	cone PR1	TEAD1
PHLDA21	0.000168566	0.282215	0.155	0.121	1	cone PR1	PHLDA2
SLK1	0.000193435	0.327203	0.207	0.176	1	cone PR1	SLK

## Sheet: cone PR2
	p_val	avg_logFC	pct.1	pct.2	p_val_adj	cluster	gene
RXRG5	0	2.07516	0.965	0.207	0	cone PR2	RXRG
EGFLAM4	0	1.94806	0.769	0.079	0	cone PR2	EGFLAM
RBP45	0	1.87992	0.993	0.295	0	cone PR2	RBP4
FIBCD1	0	1.80032	0.485	0.023	0	cone PR2	FIBCD1
TPBGL2	0	1.68292	0.527	0.043	0	cone PR2	TPBGL
SALL15	0	1.47922	0.56	0.098	0	cone PR2	SALL1
OPN1LW	0	1.44682	0.292	0.007	0	cone PR2	OPN1LW
FSCN24	0	1.43177	0.621	0.076	0	cone PR2	FSCN2
THRB5	0	1.42134	0.663	0.087	0	cone PR2	THRB
LOC1070503284	0	1.40097	0.64	0.098	0	cone PR2	LOC107050328
IMPG25	0	1.31275	0.63	0.123	0	cone PR2	IMPG2
GNGT2	0	1.2799	0.379	0.017	0	cone PR2	GNGT2
SAMD75	0	1.25797	0.509	0.067	0	cone PR2	SAMD7
PPL1	0	1.15135	0.333	0.025	0	cone PR2	PPL
PTPRM1	0	1.08877	0.344	0.029	0	cone PR2	PTPRM
RP11	0	0.978761	0.309	0.018	0	cone PR2	RP1
GNG131	2.3064e-303	1.32535	0.417	0.048	5.52774e-299	cone PR2	GNG13
NR2E33	4.96868e-302	1.11732	0.441	0.055	1.19084e-297	cone PR2	NR2E3
LOC770996	1.23119e-300	0.960436	0.231	0.009	2.9508e-296	cone PR2	LOC770996
KCNH61	6.48307e-287	1.16391	0.386	0.043	1.5538e-282	cone PR2	KCNH6
LOC1125299631	1.16485e-268	1.08187	0.269	0.019	2.7918e-264	cone PR2	LOC112529963
NTNG21	1.11452e-263	1.01969	0.323	0.031	2.67116e-259	cone PR2	NTNG2
OTX23	5.58125e-251	1.0281	0.989	0.595	1.33766e-246	cone PR2	OTX2
RS1	4.47357e-238	1.08129	0.183	0.007	1.07218e-233	cone PR2	RS1
RGCC5	1.21563e-236	1.1273	0.513	0.106	2.9135e-232	cone PR2	RGCC
PRDM16	3.80429e-232	1.17533	0.684	0.198	9.11774e-228	cone PR2	PRDM1
2019-03-12	1.60692e-227	1.07851	0.421	0.071	3.85131e-223	cone PR2	2019-03-01
C9ORF58	1.67937e-225	0.825116	0.23	0.016	4.02495e-221	cone PR2	C9ORF58
ISL21	1.40748e-224	0.988702	0.347	0.045	3.37332e-220	cone PR2	ISL2
IGFBP2	9.44964e-222	0.790469	0.188	0.009	2.26479e-217	cone PR2	IGFBP2
RASSF85	2.08864e-212	1.0436	0.438	0.082	5.00585e-208	cone PR2	RASSF8
FAM53B5	1.41791e-204	1.22965	0.73	0.278	3.39831e-200	cone PR2	FAM53B
CLSTN14	1.02686e-200	1.22684	0.917	0.626	2.46107e-196	cone PR2	CLSTN1
LOC101749755	4.78588e-199	0.650864	0.165	0.008	1.14703e-194	cone PR2	LOC101749755
PIK3R1	2.59023e-191	0.7832	0.202	0.015	6.208e-187	cone PR2	PIK3R1
LOC1017521065	9.05296e-189	1.06805	0.425	0.086	2.16972e-184	cone PR2	LOC101752106
KIT1	2.69401e-182	0.730083	0.208	0.018	6.45674e-178	cone PR2	KIT
PLEKHG4	6.99351e-182	0.696444	0.204	0.017	1.67613e-177	cone PR2	PLEKHG4
EDIL34	7.29357e-177	1.1052	0.495	0.127	1.74805e-172	cone PR2	EDIL3
MAP4K43	6.88429e-174	0.890212	0.942	0.742	1.64996e-169	cone PR2	MAP4K4
CABP4	1.6081e-173	0.58994	0.151	0.008	3.85413e-169	cone PR2	CABP4
NRN1L5	2.01873e-172	1.24708	0.543	0.159	4.83829e-168	cone PR2	NRN1L
PIBPPDD4L4	1.20314e-169	1.11994	0.681	0.266	2.88356e-165	cone PR2	PIBPPDD4L
LOC4153241	1.01398e-167	0.735958	0.224	0.024	2.4302e-163	cone PR2	LOC415324
PDE6H	8.04378e-167	0.797656	0.198	0.018	1.92785e-162	cone PR2	PDE6H
ADAMTS35	1.57622e-163	0.984275	0.582	0.185	3.77773e-159	cone PR2	ADAMTS3
PPP2R2B1	2.69388e-158	0.75962	0.261	0.036	6.45642e-154	cone PR2	PPP2R2B
CBFA2T34	1.2807e-157	1.09509	0.647	0.242	3.06945e-153	cone PR2	CBFA2T3
FSTL53	3.08993e-152	0.99449	0.707	0.307	7.40562e-148	cone PR2	FSTL5
ANTXRL3	1.9599e-150	1.13137	0.667	0.288	4.6973e-146	cone PR2	ANTXRL
MAK1	1.95992e-150	0.76264	0.23	0.029	4.69733e-146	cone PR2	MAK
GNAT2	7.89036e-147	0.707367	0.151	0.01	1.89108e-142	cone PR2	GNAT2
CDC42BPB3	2.74055e-145	0.915089	0.797	0.442	6.56827e-141	cone PR2	CDC42BPB
ACKR33	2.8496e-144	0.902138	0.371	0.083	6.82964e-140	cone PR2	ACKR3
RAPGEF53	1.98383e-143	0.859023	0.343	0.071	4.75464e-139	cone PR2	RAPGEF5
PYGL3	1.48636e-142	0.919601	0.362	0.08	3.56237e-138	cone PR2	PYGL
H3F3B1	4.68108e-142	0.556136	0.997	0.988	1.12191e-137	cone PR2	H3F3B
GPC25	3.77704e-141	0.881301	0.426	0.11	9.05243e-137	cone PR2	GPC2
NTM3	2.24372e-140	0.964147	0.593	0.222	5.37751e-136	cone PR2	NTM
UNC13D	1.29719e-135	0.760692	0.216	0.029	3.10898e-131	cone PR2	UNC13D
LOC1070562753	6.09924e-135	0.877704	0.383	0.094	1.4618e-130	cone PR2	LOC107056275
PDE6B2	1.1249e-132	0.703667	0.214	0.028	2.69605e-128	cone PR2	PDE6B
ODC13	3.32145e-132	1.12195	0.772	0.479	7.96051e-128	cone PR2	ODC1
NPDC14	2.55214e-128	0.896669	0.656	0.291	6.11671e-124	cone PR2	NPDC1
GSTAL24	9.05095e-127	0.936909	0.331	0.075	2.16924e-122	cone PR2	GSTAL2
TNFRSF213	1.42412e-126	0.867556	0.437	0.128	3.4132e-122	cone PR2	TNFRSF21
EPB41L4A1	6.84074e-126	0.696965	0.259	0.045	1.63952e-121	cone PR2	EPB41L4A
LOC100858777	1.92193e-125	0.531379	0.14	0.011	4.6063e-121	cone PR2	LOC100858777
LOC100857632	1.88631e-120	0.577351	0.18	0.021	4.52091e-116	cone PR2	LOC100857632
NACAD3	4.30289e-119	0.907066	0.608	0.256	1.03127e-114	cone PR2	NACAD
LOC1070531851	1.13176e-117	0.749941	0.259	0.048	2.71249e-113	cone PR2	LOC107053185
KRAS5	5.99902e-117	0.992012	0.684	0.369	1.43778e-112	cone PR2	KRAS
FRMD14	2.19513e-116	0.835559	0.363	0.096	5.26107e-112	cone PR2	FRMD1
AES2	2.54675e-116	0.902064	0.626	0.285	6.1038e-112	cone PR2	AES
ABCG42	1.34901e-115	0.849567	0.399	0.114	3.23316e-111	cone PR2	ABCG4
LOC107055922	1.53384e-113	0.442646	0.121	0.009	3.67615e-109	cone PR2	LOC107055922
ANKRD33B1	2.47267e-113	0.63022	0.204	0.03	5.92624e-109	cone PR2	ANKRD33B
PIK3R32	8.79944e-112	0.93478	0.582	0.253	2.10896e-107	cone PR2	PIK3R3
BTG23	1.64614e-108	0.963629	0.606	0.288	3.94531e-104	cone PR2	BTG2
GRIA22	2.84591e-108	0.829221	0.38	0.108	6.82079e-104	cone PR2	GRIA2
PTPN134	9.77487e-108	0.791194	0.298	0.07	2.34274e-103	cone PR2	PTPN13
PLEKHG54	1.29317e-105	0.803596	0.321	0.081	3.09934e-101	cone PR2	PLEKHG5
MEIS24	3.4196e-105	0.764345	0.618	0.276	8.19575e-101	cone PR2	MEIS2
PSD4	3.79549e-105	0.82151	0.515	0.205	9.09666e-101	cone PR2	PSD
EPHX2	1.06636e-104	0.581663	0.181	0.026	2.55576e-100	cone PR2	EPHX2
MAP25	2.57052e-104	0.736426	0.848	0.623	6.16077e-100	cone PR2	MAP2
SMAD75	4.11703e-103	0.846097	0.48	0.177	9.86729e-99	cone PR2	SMAD7
TLE2L1	7.56318e-103	0.590499	0.211	0.036	1.81267e-98	cone PR2	TLE2L
NHSL13	2.5362e-102	0.787407	0.609	0.281	6.07852e-98	cone PR2	NHSL1
ATP11A5	6.16646e-102	0.786951	0.397	0.122	1.47791e-97	cone PR2	ATP11A
TRIM35	2.57551e-100	0.592479	0.171	0.024	6.17272e-96	cone PR2	TRIM35
GRIK13	1.75124e-99	0.703094	0.274	0.062	4.1972e-95	cone PR2	GRIK1
NFASC3	2.03112e-99	0.763789	0.64	0.304	4.86797e-95	cone PR2	NFASC
RAI22	2.38678e-98	0.753191	0.284	0.068	5.72041e-94	cone PR2	RAI2
MAP63	5.67104e-95	0.698275	0.722	0.385	1.35918e-90	cone PR2	MAP6
DCLK11	8.26947e-94	0.777177	0.267	0.064	1.98194e-89	cone PR2	DCLK1
SYNPR1	1.24055e-92	0.854635	0.347	0.107	2.97322e-88	cone PR2	SYNPR
SELENOI3	3.52492e-92	0.852625	0.413	0.147	8.44816e-88	cone PR2	SELENOI
PCBP21	8.3537e-92	0.76195	0.802	0.56	2.00213e-87	cone PR2	PCBP2
PCBP42	3.93405e-91	0.73544	0.73	0.45	9.42874e-87	cone PR2	PCBP4
SPTBN22	5.97034e-90	0.782212	0.426	0.157	1.43091e-85	cone PR2	SPTBN2
RP1L11	2.17486e-87	0.529265	0.134	0.016	5.2125e-83	cone PR2	RP1L1
SEMA7A1	7.97387e-86	0.595739	0.208	0.042	1.9111e-81	cone PR2	SEMA7A
DPYSL32	3.55136e-85	0.803255	0.386	0.135	8.51154e-81	cone PR2	DPYSL3
CDH18	6.97501e-85	0.552911	0.14	0.019	1.6717e-80	cone PR2	CDH18
KCNH4	1.59661e-84	0.515604	0.148	0.021	3.8266e-80	cone PR2	KCNH4
YBX34	9.94718e-84	0.73207	0.667	0.382	2.38404e-79	cone PR2	YBX3
KCNK31	1.5793e-83	0.620236	0.233	0.052	3.7851e-79	cone PR2	KCNK3
STX3	8.99267e-83	0.632415	0.195	0.038	2.15527e-78	cone PR2	STX3
STXBP11	8.27474e-79	0.795741	0.496	0.233	1.98321e-74	cone PR2	STXBP1
HSP90AB12	2.13185e-78	0.767253	0.733	0.488	5.1094e-74	cone PR2	HSP90AB1
PGM2L12	5.55511e-78	0.76367	0.452	0.192	1.33139e-73	cone PR2	PGM2L1
KIF252	6.78168e-77	0.668136	0.265	0.072	1.62536e-72	cone PR2	KIF25
NEUROD13	4.38513e-76	0.711487	0.328	0.106	1.05098e-71	cone PR2	NEUROD1
PLCH24	2.65282e-75	0.65439	0.372	0.131	6.358e-71	cone PR2	PLCH2
EXTL1	5.07814e-75	0.442524	0.112	0.013	1.21708e-70	cone PR2	EXTL1
EPHA32	7.55885e-75	0.756168	0.399	0.154	1.81163e-70	cone PR2	EPHA3
STARD131	8.03072e-74	0.561439	0.218	0.05	1.92472e-69	cone PR2	STARD13
KIAA05561	3.10257e-73	0.623895	0.23	0.057	7.43592e-69	cone PR2	KIAA0556
GALNT9	7.11505e-73	0.635598	0.204	0.047	1.70526e-68	cone PR2	GALNT9
RASGRF2	9.15694e-73	0.463988	0.13	0.019	2.19464e-68	cone PR2	RASGRF2
IGFBP5	3.83387e-72	0.555286	0.163	0.03	9.18864e-68	cone PR2	IGFBP5
GREB1L3	1.22378e-71	0.671657	0.308	0.099	2.93304e-67	cone PR2	GREB1L
EML54	1.24814e-71	0.698849	0.32	0.106	2.99142e-67	cone PR2	EML5
SEPW13	1.58948e-71	0.53526	0.849	0.712	3.80951e-67	cone PR2	SEPW1
SGK11	1.81606e-71	0.518802	0.18	0.036	4.35255e-67	cone PR2	SGK1
SDK21	1.7982e-70	0.723208	0.39	0.156	4.30974e-66	cone PR2	SDK2
CASZ13	1.13001e-69	0.663942	0.453	0.193	2.70829e-65	cone PR2	CASZ1
CTNNA12	3.82361e-69	0.737933	0.374	0.147	9.16404e-65	cone PR2	CTNNA1
HSPB93	9.997e-69	0.998751	0.358	0.134	2.39598e-64	cone PR2	HSPB9
TWF14	1.23109e-68	0.660433	0.321	0.111	2.95056e-64	cone PR2	TWF1
LHX41	2.0231e-68	0.538015	0.151	0.027	4.84876e-64	cone PR2	LHX4
2019-09-08	7.1748e-68	0.577552	0.207	0.051	1.71958e-63	cone PR2	2019-09-08
ARL92	3.23772e-67	0.688995	0.376	0.152	7.75985e-63	cone PR2	ARL9
TUB1	6.45362e-66	0.691697	0.337	0.125	1.54674e-61	cone PR2	TUB
BCL2L1	3.52339e-65	0.662229	0.438	0.199	8.44452e-61	cone PR2	BCL2L1
CNTFR	5.45834e-65	0.40288	0.117	0.017	1.3082e-60	cone PR2	CNTFR
MTSS12	1.19886e-64	0.639405	0.448	0.2	2.87331e-60	cone PR2	MTSS1
ACTB2	4.52951e-64	0.403095	0.988	0.963	1.08559e-59	cone PR2	ACTB
LURAP1	1.69968e-63	0.420155	0.133	0.023	4.07362e-59	cone PR2	LURAP1
NPC2	2.11095e-63	0.481247	0.142	0.026	5.05932e-59	cone PR2	NPC2
C14orf1323	3.40471e-63	0.721652	0.409	0.176	8.16006e-59	cone PR2	C14orf132
PNRC13	8.40624e-63	0.406502	0.966	0.909	2.01472e-58	cone PR2	PNRC1
ADGRV11	1.45482e-62	0.57494	0.187	0.045	3.48676e-58	cone PR2	ADGRV1
CD631	2.68253e-62	0.705508	0.399	0.176	6.42921e-58	cone PR2	CD63
MXRA73	2.41749e-61	0.66384	0.37	0.153	5.794e-57	cone PR2	MXRA7
CLMN3	3.2101e-61	0.648804	0.376	0.152	7.69365e-57	cone PR2	CLMN
RTN4RL14	3.99599e-61	0.530095	0.272	0.084	9.57718e-57	cone PR2	RTN4RL1
LRRTM4	1.09008e-60	0.46146	0.106	0.015	2.61259e-56	cone PR2	LRRTM4
DAB2IP2	1.53885e-60	0.653426	0.578	0.33	3.68817e-56	cone PR2	DAB2IP
SREBF22	5.59126e-60	0.630687	0.661	0.421	1.34006e-55	cone PR2	SREBF2
SAMD111	1.14137e-59	0.684407	0.313	0.116	2.73551e-55	cone PR2	SAMD11
SERINC51	3.56463e-59	0.633811	0.266	0.089	8.54336e-55	cone PR2	SERINC5
ARHGEF61	1.68768e-58	0.611241	0.249	0.079	4.04487e-54	cone PR2	ARHGEF6
CORO2B2	1.8941e-58	0.669309	0.458	0.223	4.53959e-54	cone PR2	CORO2B
ROBO24	4.67698e-58	0.56476	0.651	0.409	1.12093e-53	cone PR2	ROBO2
LIMD23	1.27924e-57	0.662755	0.41	0.19	3.06594e-53	cone PR2	LIMD2
DACT25	3.76006e-56	0.733507	0.319	0.125	9.01174e-52	cone PR2	DACT2
GDPD52	3.02496e-55	0.590877	0.304	0.114	7.24991e-51	cone PR2	GDPD5
KLHL352	6.00809e-53	0.648123	0.501	0.271	1.43996e-48	cone PR2	KLHL35
FAAH	7.26555e-53	0.466985	0.153	0.035	1.74133e-48	cone PR2	FAAH
WSCD21	8.36557e-53	0.55266	0.238	0.078	2.00498e-48	cone PR2	WSCD2
TLE1L1	2.58404e-51	0.420383	0.184	0.05	6.19317e-47	cone PR2	TLE1L
LMO42	2.68019e-51	0.648764	0.358	0.159	6.42362e-47	cone PR2	LMO4
DCTN13	1.99383e-50	0.576147	0.589	0.374	4.77862e-46	cone PR2	DCTN1
SV2B1	2.38565e-50	0.623329	0.397	0.19	5.7177e-46	cone PR2	SV2B
SAMD101	3.42822e-50	0.475874	0.165	0.042	8.2164e-46	cone PR2	SAMD10
SLC29A1	4.02525e-50	0.43486	0.152	0.036	9.64732e-46	cone PR2	SLC29A1
IP6K1	4.2457e-49	0.609178	0.351	0.157	1.01757e-44	cone PR2	IP6K1
STAT5B3	5.01231e-49	0.499185	0.258	0.09	1.2013e-44	cone PR2	STAT5B
LOC1125327221	9.02393e-49	0.341254	0.105	0.018	2.16276e-44	cone PR2	LOC112532722
PSD21	2.75927e-48	0.473903	0.187	0.054	6.61315e-44	cone PR2	PSD2
RREB1	8.54732e-48	0.502967	0.167	0.045	2.04854e-43	cone PR2	RREB1
HIP13	9.38913e-48	0.575905	0.397	0.193	2.25029e-43	cone PR2	HIP1
ZNF804B2	1.07574e-47	0.460488	0.22	0.071	2.57823e-43	cone PR2	ZNF804B
CPE3	3.34444e-47	0.55956	0.695	0.519	8.01561e-43	cone PR2	CPE
SREBF11	4.75627e-47	0.557724	0.337	0.151	1.13993e-42	cone PR2	SREBF1
VASH11	5.61415e-47	0.615813	0.426	0.229	1.34554e-42	cone PR2	VASH1
SNRK1	1.92839e-46	0.596987	0.367	0.173	4.62178e-42	cone PR2	SNRK
C1orf1672	2.53819e-46	0.507758	0.183	0.054	6.08329e-42	cone PR2	C1orf167
CRB2	3.36497e-45	0.424851	0.142	0.035	8.06483e-41	cone PR2	CRB2
BSG3	3.31647e-44	0.560202	0.625	0.443	7.94857e-40	cone PR2	BSG
TPI12	8.06549e-44	0.508727	0.704	0.535	1.93305e-39	cone PR2	TPI1
HCN21	1.57782e-43	0.40612	0.161	0.044	3.78157e-39	cone PR2	HCN2
HCRT1	2.35649e-43	0.465354	0.227	0.08	5.64781e-39	cone PR2	HCRT
NLK2	7.67799e-43	0.559515	0.372	0.187	1.84018e-38	cone PR2	NLK
KIAA11073	2.03557e-42	0.552337	0.435	0.233	4.87865e-38	cone PR2	KIAA1107
TTC82	2.62599e-42	0.491624	0.277	0.112	6.29372e-38	cone PR2	TTC8
NEK64	4.7901e-42	0.489783	0.277	0.112	1.14804e-37	cone PR2	NEK6
HTRA14	7.18356e-42	0.501179	0.328	0.147	1.72168e-37	cone PR2	HTRA1
DIRAS11	9.74884e-42	0.414197	0.195	0.063	2.33651e-37	cone PR2	DIRAS1
CCDC50	1.36868e-41	0.662311	0.317	0.148	3.28033e-37	cone PR2	CCDC50
LDLRAD43	2.00817e-41	0.498129	0.28	0.117	4.81299e-37	cone PR2	LDLRAD4
UNC5B	2.60638e-41	0.481819	0.187	0.06	6.24671e-37	cone PR2	UNC5B
TMEM1081	2.89899e-41	0.448092	0.13	0.032	6.948e-37	cone PR2	TMEM108
ITGA113	1.07409e-40	0.506702	0.231	0.086	2.57427e-36	cone PR2	ITGA11
SCG33	1.14722e-40	0.602532	0.458	0.256	2.74953e-36	cone PR2	SCG3
SPEG1	4.5838e-40	0.535643	0.292	0.128	1.0986e-35	cone PR2	SPEG
NCOA1	7.09825e-40	0.565418	0.344	0.17	1.70124e-35	cone PR2	NCOA1
ALDOC2	8.01633e-40	0.37362	0.84	0.708	1.92127e-35	cone PR2	ALDOC
LOC107053809	9.95348e-40	0.308025	0.102	0.021	2.38555e-35	cone PR2	LOC107053809
SAT14	1.21827e-39	0.549696	0.415	0.225	2.91984e-35	cone PR2	SAT1
GPX42	2.4825e-39	0.551574	0.687	0.559	5.94981e-35	cone PR2	GPX4
OAT1	3.14045e-39	0.639297	0.364	0.19	7.52671e-35	cone PR2	OAT
RDH51	4.32993e-39	0.398274	0.159	0.047	1.03775e-34	cone PR2	RDH5
HINTW1	4.82435e-39	0.25558	0.992	0.995	1.15625e-34	cone PR2	HINTW
ENO21	1.54671e-38	0.527212	0.276	0.118	3.70701e-34	cone PR2	ENO2
IGSF9B4	3.75025e-38	0.535774	0.399	0.21	8.98821e-34	cone PR2	IGSF9B
CST31	8.03329e-38	0.582125	0.516	0.338	1.92534e-33	cone PR2	CST3
LOC419584	8.41922e-38	0.443002	0.138	0.038	2.01783e-33	cone PR2	LOC419584
EML4	9.53086e-38	0.433866	0.148	0.043	2.28426e-33	cone PR2	EML4
UNC1192	1.80354e-37	0.510895	0.419	0.227	4.32255e-33	cone PR2	UNC119
TRAPPC101	5.69823e-37	0.51387	0.333	0.164	1.36569e-32	cone PR2	TRAPPC10
LOC1070534991	6.84353e-37	0.40225	0.155	0.047	1.64019e-32	cone PR2	LOC107053499
RIMS12	9.60085e-37	0.483261	0.177	0.059	2.30104e-32	cone PR2	RIMS1
MYCL1	1.85936e-36	0.528854	0.337	0.167	4.45633e-32	cone PR2	MYCL
1972-09-01	3.08756e-36	0.519815	0.606	0.444	7.39994e-32	cone PR2	2019-09-07
PLS1	4.9442e-36	0.423516	0.147	0.044	1.18498e-31	cone PR2	PLS1
NANOS13	1.04022e-35	0.617474	0.3	0.138	2.4931e-31	cone PR2	NANOS1
HMGCR2	1.36145e-35	0.558665	0.601	0.434	3.26299e-31	cone PR2	HMGCR
SEC14L5	2.06577e-35	0.550508	0.249	0.107	4.95104e-31	cone PR2	SEC14L5
SIGMAR1	5.29013e-35	0.385157	0.129	0.036	1.26789e-30	cone PR2	SIGMAR1
ACTC2L	5.46997e-35	0.338127	0.983	0.957	1.31099e-30	cone PR2	ACTC2L
ZIC33	7.85216e-35	0.605432	0.243	0.103	1.88193e-30	cone PR2	ZIC3
LOC1070526822	8.62818e-35	0.430472	0.112	0.027	2.06792e-30	cone PR2	LOC107052682
ACVR2A	1.89639e-34	0.419885	0.168	0.057	4.54509e-30	cone PR2	ACVR2A
NDFIP11	2.12057e-34	0.464697	0.602	0.447	5.08237e-30	cone PR2	NDFIP1
SFXN32	2.44699e-34	0.543773	0.267	0.121	5.86471e-30	cone PR2	SFXN3
PKIB1	2.78675e-34	0.346416	0.11	0.027	6.67901e-30	cone PR2	PKIB
GAB3	2.85883e-34	0.343026	0.12	0.031	6.85175e-30	cone PR2	GAB3
KIF3C	3.02439e-34	0.459485	0.204	0.078	7.24856e-30	cone PR2	KIF3C
DGAT2	9.82751e-34	0.373665	0.14	0.042	2.35536e-29	cone PR2	DGAT2
NIN2	2.81809e-33	0.543576	0.351	0.191	6.75411e-29	cone PR2	NIN
MB21D2	8.14884e-33	0.352	0.116	0.031	1.95303e-28	cone PR2	MB21D2
LOC107051705	1.8512e-32	0.560019	0.208	0.086	4.43677e-28	cone PR2	LOC107051705
SOWAHC1	5.14521e-32	0.490437	0.192	0.073	1.23315e-27	cone PR2	SOWAHC
RAVER21	5.52454e-32	0.486696	0.204	0.082	1.32407e-27	cone PR2	RAVER2
PPIB	7.87695e-32	0.409522	0.734	0.622	1.88787e-27	cone PR2	PPIB
LASP11	9.37547e-32	0.534487	0.294	0.146	2.24702e-27	cone PR2	LASP1
MSMO14	9.53379e-32	0.576195	0.415	0.25	2.28496e-27	cone PR2	MSMO1
UBALD11	1.09747e-31	0.504213	0.38	0.219	2.63029e-27	cone PR2	UBALD1
RSF1	6.12813e-31	0.534887	0.484	0.327	1.46873e-26	cone PR2	RSF1
SLC24A31	7.02917e-31	0.462126	0.191	0.074	1.68468e-26	cone PR2	SLC24A3
PHLDA22	1.13399e-30	0.482155	0.251	0.114	2.71783e-26	cone PR2	PHLDA2
APLP24	2.20134e-30	0.486426	0.402	0.239	5.27595e-26	cone PR2	APLP2
CDC42BPA2	2.38474e-30	0.47085	0.368	0.209	5.71551e-26	cone PR2	CDC42BPA
CYTH1	4.59842e-30	0.420105	0.151	0.052	1.1021e-25	cone PR2	CYTH1
AKAP9	5.89107e-30	0.557269	0.402	0.25	1.41191e-25	cone PR2	AKAP9
GTF2IRD13	7.00144e-30	0.445483	0.359	0.197	1.67803e-25	cone PR2	GTF2IRD1
CLSTN32	1.78711e-29	0.449685	0.274	0.132	4.28318e-25	cone PR2	CLSTN3
GZMM2	1.90636e-29	0.516908	0.444	0.289	4.56898e-25	cone PR2	GZMM
ARL4A4	1.98867e-29	0.524307	0.368	0.213	4.76625e-25	cone PR2	ARL4A
BTBD6	3.60669e-29	0.480615	0.226	0.101	8.64416e-25	cone PR2	BTBD6
HHLA2	4.84978e-29	0.343215	0.12	0.035	1.16235e-24	cone PR2	HHLA2
MTCL14	8.81855e-29	0.515502	0.219	0.097	2.11354e-24	cone PR2	MTCL1
FAM103A1	1.05032e-28	0.487073	0.46	0.312	2.51729e-24	cone PR2	FAM103A1
NPHP4	1.35016e-28	0.323793	0.141	0.047	3.23592e-24	cone PR2	NPHP4
SYNGR12	1.84649e-28	0.498084	0.352	0.204	4.42549e-24	cone PR2	SYNGR1
ARHGAP241	7.67451e-28	0.408722	0.12	0.037	1.83935e-23	cone PR2	ARHGAP24
GAS2L1	1.27903e-27	0.385015	0.157	0.058	3.06544e-23	cone PR2	GAS2L1
IGF2BP2	1.32516e-27	0.438308	0.296	0.154	3.17601e-23	cone PR2	IGF2BP2
UST3	1.96257e-27	0.416847	0.199	0.082	4.70369e-23	cone PR2	UST
LOC1125315201	2.74581e-27	0.414983	0.147	0.052	6.58089e-23	cone PR2	LOC112531520
ZBTB181	4.93288e-27	0.388132	0.656	0.524	1.18226e-22	cone PR2	ZBTB18
ANK22	1.17875e-26	0.463211	0.337	0.19	2.82512e-22	cone PR2	ANK2
SEC61G2	1.599e-26	0.373956	0.7	0.595	3.83233e-22	cone PR2	SEC61G
SMAD2Z1	8.04032e-26	0.406384	0.194	0.083	1.92702e-21	cone PR2	SMAD2Z
MAGI13	1.0571e-25	0.421719	0.512	0.366	2.53355e-21	cone PR2	MAGI1
DHRS31	1.32329e-25	0.50091	0.251	0.125	3.17152e-21	cone PR2	DHRS3
EPB414	1.78561e-25	0.382229	0.652	0.523	4.27957e-21	cone PR2	EPB41
CLUH	4.43742e-25	0.394996	0.173	0.071	1.06352e-20	cone PR2	CLUH
SERF21	6.20789e-25	0.290429	0.902	0.865	1.48784e-20	cone PR2	SERF2
CNKSR21	9.34636e-25	0.28372	0.106	0.032	2.24004e-20	cone PR2	CNKSR2
PLEKHB1	1.10022e-24	0.45398	0.332	0.191	2.6369e-20	cone PR2	PLEKHB1
RGS35	4.73362e-24	0.408542	0.456	0.301	1.13451e-19	cone PR2	RGS3
CKMT1A3	6.68949e-24	0.507974	0.335	0.2	1.60327e-19	cone PR2	CKMT1A
CYP51A12	9.64556e-24	0.546041	0.376	0.242	2.31175e-19	cone PR2	CYP51A1
DOT1L2	1.29837e-23	0.43194	0.38	0.24	3.11181e-19	cone PR2	DOT1L
IDI14	2.60401e-23	0.463582	0.297	0.168	6.24104e-19	cone PR2	IDI1
ENC12	2.65393e-23	0.408579	0.242	0.121	6.36067e-19	cone PR2	ENC1
RAB11FIP42	2.66649e-23	0.450652	0.288	0.159	6.39077e-19	cone PR2	RAB11FIP4
FAM69B	1.01451e-22	0.281422	0.11	0.036	2.43148e-18	cone PR2	FAM69B
CHCHD10	1.09759e-22	0.443516	0.423	0.29	2.6306e-18	cone PR2	CHCHD10
ACOT72	1.14292e-22	0.390383	0.266	0.142	2.73924e-18	cone PR2	ACOT7
CRNKL1	1.2203e-22	0.405577	0.272	0.148	2.9247e-18	cone PR2	CRNKL1
TRIM91	1.375e-22	0.426839	0.258	0.136	3.29547e-18	cone PR2	TRIM9
CCSER15	1.5651e-22	0.414404	0.481	0.337	3.75107e-18	cone PR2	CCSER1
ETV51	1.60703e-22	0.430227	0.224	0.112	3.85158e-18	cone PR2	ETV5
TCP11L21	1.83198e-22	0.37751	0.177	0.077	4.3907e-18	cone PR2	TCP11L2
TP53INP21	1.95611e-22	0.393512	0.294	0.164	4.6882e-18	cone PR2	TP53INP2
ABCC51	2.53787e-22	0.354281	0.184	0.081	6.0825e-18	cone PR2	ABCC5
CHST10	2.704e-22	0.466892	0.258	0.14	6.48068e-18	cone PR2	CHST10
CXXC5	4.91901e-22	0.395566	0.586	0.464	1.17894e-17	cone PR2	CXXC5
TACC22	8.34653e-22	0.356978	0.351	0.211	2.00041e-17	cone PR2	TACC2
FAM49A1	1.14498e-21	0.377012	0.171	0.076	2.74417e-17	cone PR2	FAM49A
LRRC59	4.79584e-21	0.311749	0.138	0.055	1.14942e-16	cone PR2	LRRC59
DNAJC5	5.55539e-21	0.418692	0.234	0.124	1.33146e-16	cone PR2	DNAJC5
CCND21	8.23246e-21	0.386095	0.21	0.104	1.97307e-16	cone PR2	CCND2
NOL91	1.2173e-20	0.417391	0.511	0.391	2.9175e-16	cone PR2	NOL9
EZR4	1.44122e-20	0.396195	0.332	0.205	3.45417e-16	cone PR2	EZR
SYT112	2.29767e-20	0.358781	0.54	0.409	5.50684e-16	cone PR2	SYT11
1981-03-01	2.45577e-20	0.352721	0.185	0.087	5.88575e-16	cone PR2	2019-03-08
PTBP32	3.01911e-20	0.336593	0.164	0.072	7.23589e-16	cone PR2	PTBP3
GRID2	3.31466e-20	0.297129	0.121	0.045	7.94426e-16	cone PR2	GRID2
PAQR91	4.06253e-20	0.430826	0.38	0.252	9.73667e-16	cone PR2	PAQR9
GHDC	6.01893e-20	0.307379	0.113	0.041	1.44256e-15	cone PR2	GHDC
CAD1	6.83656e-20	0.367848	0.22	0.114	1.63852e-15	cone PR2	CAD
UBE2L62	7.38604e-20	0.335623	0.208	0.104	1.77021e-15	cone PR2	UBE2L6
JARID22	9.44747e-20	0.380257	0.258	0.142	2.26428e-15	cone PR2	JARID2
ATP2B42	9.46519e-20	0.385185	0.501	0.369	2.26852e-15	cone PR2	ATP2B4
CETN31	9.66442e-20	0.406574	0.249	0.137	2.31627e-15	cone PR2	CETN3
HSP90B12	1.18897e-19	0.503709	0.403	0.284	2.84959e-15	cone PR2	HSP90B1
HS3ST3B1L	2.0788e-19	0.267376	0.114	0.042	4.98226e-15	cone PR2	HS3ST3B1L
SDC32	2.21711e-19	0.380294	0.206	0.102	5.31374e-15	cone PR2	SDC3
RNF1301	2.54906e-19	0.353194	0.203	0.102	6.10932e-15	cone PR2	RNF130
MYNN	3.07236e-19	0.325441	0.165	0.075	7.36351e-15	cone PR2	MYNN
SLAIN1	3.60099e-19	0.328752	0.161	0.073	8.63048e-15	cone PR2	SLAIN1
BRK1	5.92872e-19	0.338099	0.629	0.545	1.42094e-14	cone PR2	BRK1
TMEM1351	8.18564e-19	0.380676	0.198	0.099	1.96185e-14	cone PR2	TMEM135
LOC1125301611	9.89794e-19	0.343857	0.157	0.071	2.37224e-14	cone PR2	LOC112530161
TMEM132A2	1.19745e-18	0.391832	0.362	0.236	2.86993e-14	cone PR2	TMEM132A
AP3B22	3.11926e-18	0.378998	0.202	0.104	7.47593e-14	cone PR2	AP3B2
SELENOS	4.1237e-18	0.424619	0.317	0.204	9.88327e-14	cone PR2	SELENOS
AJAP11	4.18824e-18	0.286662	0.103	0.038	1.0038e-13	cone PR2	AJAP1
TPRG1L1	4.43297e-18	0.352575	0.223	0.12	1.06245e-13	cone PR2	TPRG1L
RBP52	6.24818e-18	0.433911	0.34	0.223	1.4975e-13	cone PR2	RBP5
EPHB12	6.35004e-18	0.386142	0.242	0.135	1.52191e-13	cone PR2	EPHB1
HAP13	1.36409e-17	0.366057	0.481	0.368	3.26931e-13	cone PR2	HAP1
RFX51	1.80945e-17	0.31891	0.16	0.074	4.33671e-13	cone PR2	RFX5
BZW22	1.91825e-17	0.396416	0.495	0.388	4.59746e-13	cone PR2	BZW2
FBXO32	1.94131e-17	0.320456	0.124	0.051	4.65274e-13	cone PR2	FBXO32
EHBP1	2.01762e-17	0.379834	0.304	0.191	4.83564e-13	cone PR2	EHBP1
CBY1	2.7972e-17	0.387201	0.253	0.149	6.70404e-13	cone PR2	CBY1
SESN3	4.45859e-17	0.273981	0.102	0.038	1.06859e-12	cone PR2	SESN3
RHPN1	4.5942e-17	0.283747	0.132	0.056	1.10109e-12	cone PR2	RHPN1
CHD71	5.13742e-17	0.300438	0.745	0.682	1.23129e-12	cone PR2	CHD7
NECTIN1	6.05385e-17	0.335349	0.536	0.435	1.45093e-12	cone PR2	NECTIN1
SYNE11	1.32993e-16	0.439635	0.136	0.061	3.18745e-12	cone PR2	SYNE1
TM9SF2L	1.90163e-16	0.310045	0.191	0.099	4.55763e-12	cone PR2	TM9SF2L
OAZ22	1.97401e-16	0.352129	0.434	0.318	4.73111e-12	cone PR2	OAZ2
TMEM1981	2.14201e-16	0.335627	0.48	0.368	5.13377e-12	cone PR2	TMEM198
MRAS4	2.34087e-16	0.328834	0.336	0.217	5.61036e-12	cone PR2	MRAS
DTNBP12	2.51414e-16	0.344535	0.179	0.091	6.02564e-12	cone PR2	DTNBP1
TMEM2373	4.46604e-16	0.357387	0.237	0.136	1.07037e-11	cone PR2	TMEM237
ULK11	6.01046e-16	0.409498	0.29	0.184	1.44053e-11	cone PR2	ULK1
FOXO4	8.22876e-16	0.331208	0.214	0.119	1.97219e-11	cone PR2	FOXO4
BCAP29	9.47353e-16	0.379996	0.207	0.116	2.27052e-11	cone PR2	BCAP29
HEXIM1	1.72073e-15	0.326871	0.582	0.489	4.12407e-11	cone PR2	HEXIM1
SNX61	1.7253e-15	0.330615	0.345	0.234	4.13502e-11	cone PR2	SNX6
JAM3	1.91598e-15	0.363395	0.316	0.208	4.59202e-11	cone PR2	JAM3
FOXO33	1.98624e-15	0.364771	0.328	0.22	4.76043e-11	cone PR2	FOXO3
CADM14	2.00136e-15	0.371539	0.641	0.566	4.79665e-11	cone PR2	CADM1
MAMLD1	2.28238e-15	0.336377	0.159	0.079	5.47017e-11	cone PR2	MAMLD1
LYST	2.89382e-15	0.269105	0.112	0.046	6.93562e-11	cone PR2	LYST
TECPR2	3.27654e-15	0.274599	0.103	0.042	7.85289e-11	cone PR2	TECPR2
LOC112532284	3.39633e-15	0.37251	0.212	0.119	8.13998e-11	cone PR2	LOC112532284
SLC23A2	4.17456e-15	0.407194	0.316	0.217	1.00052e-10	cone PR2	SLC23A2
SMPD1	4.24351e-15	0.304295	0.161	0.08	1.01704e-10	cone PR2	SMPD1
FAM76B2	6.06186e-15	0.410007	0.28	0.183	1.45285e-10	cone PR2	FAM76B
TOB2	6.13897e-15	0.380189	0.2	0.113	1.47133e-10	cone PR2	TOB2
LOC1070503352	8.44844e-15	0.317419	0.18	0.096	2.02484e-10	cone PR2	LOC107050335
PTN	1.4078e-14	0.446449	0.132	0.062	3.37407e-10	cone PR2	PTN
TTYH23	1.53454e-14	0.298366	0.528	0.423	3.67783e-10	cone PR2	TTYH2
ACY1	3.21542e-14	0.327428	0.165	0.086	7.70641e-10	cone PR2	ACY1
GHITM	9.4019e-14	0.362642	0.374	0.278	2.25335e-09	cone PR2	GHITM
ETFA1	1.24392e-13	0.351783	0.309	0.212	2.9813e-09	cone PR2	ETFA
ZNF609	1.3726e-13	0.359871	0.227	0.138	3.28972e-09	cone PR2	ZNF609
SPATA20	1.50849e-13	0.264772	0.147	0.073	3.6154e-09	cone PR2	SPATA20
SOS2	1.58246e-13	0.348384	0.233	0.142	3.79268e-09	cone PR2	SOS2
ANP32A	1.69054e-13	0.358889	0.445	0.347	4.05171e-09	cone PR2	ANP32A
BRD2	1.74565e-13	0.28108	0.61	0.539	4.18379e-09	cone PR2	BRD2
FDFT11	1.90944e-13	0.421092	0.32	0.221	4.57635e-09	cone PR2	FDFT1
HSD17B71	2.03904e-13	0.28931	0.134	0.066	4.88697e-09	cone PR2	HSD17B7
TBC1D10A	2.3713e-13	0.389538	0.204	0.122	5.6833e-09	cone PR2	TBC1D10A
NTRK33	3.99757e-13	0.334636	0.149	0.077	9.58097e-09	cone PR2	NTRK3
ITPRIPL2	4.96015e-13	0.261688	0.121	0.057	1.1888e-08	cone PR2	ITPRIPL2
NRG4	6.58849e-13	0.307993	0.12	0.057	1.57906e-08	cone PR2	NRG4
LOC4171132	7.45134e-13	0.285026	0.485	0.384	1.78586e-08	cone PR2	LOC417113
KBTBD115	8.52854e-13	0.305234	0.28	0.184	2.04404e-08	cone PR2	KBTBD11
KLF9	1.24277e-12	0.276224	0.141	0.072	2.97854e-08	cone PR2	KLF9
ATP5I	2.31206e-12	0.27453	0.773	0.743	5.54131e-08	cone PR2	ATP5I
MED13L	2.87137e-12	0.329484	0.301	0.209	6.88181e-08	cone PR2	MED13L
LOC1008590722	3.11707e-12	0.351374	0.224	0.14	7.47069e-08	cone PR2	LOC100859072
ATP2A21	3.19123e-12	0.336018	0.376	0.283	7.64842e-08	cone PR2	ATP2A2
DSEL1	3.19447e-12	0.25511	0.11	0.051	7.65619e-08	cone PR2	DSEL
KLHL2	4.07455e-12	0.297698	0.202	0.121	9.76547e-08	cone PR2	KLHL2
CDH123	4.32268e-12	0.315142	0.277	0.184	1.03602e-07	cone PR2	CDH12
IQSEC32	5.01443e-12	0.403834	0.183	0.107	1.20181e-07	cone PR2	IQSEC3
MTA31	5.29415e-12	0.276469	0.137	0.07	1.26885e-07	cone PR2	MTA3
TCF125	5.33648e-12	0.270974	0.603	0.535	1.27899e-07	cone PR2	TCF12
OSBPL1A1	5.58096e-12	0.26497	0.103	0.047	1.33759e-07	cone PR2	OSBPL1A
KIAA05131	5.83226e-12	0.316133	0.272	0.181	1.39782e-07	cone PR2	KIAA0513
NRIP11	6.29377e-12	0.332098	0.406	0.318	1.50843e-07	cone PR2	NRIP1
RDH12	6.85923e-12	0.303942	0.153	0.083	1.64395e-07	cone PR2	RDH12
SMARCC1	8.0002e-12	0.291581	0.554	0.483	1.91741e-07	cone PR2	SMARCC1
MAPK8	1.36903e-11	0.277123	0.169	0.097	3.28116e-07	cone PR2	MAPK8
PEX5	1.38576e-11	0.279985	0.149	0.081	3.32126e-07	cone PR2	PEX5
PKN2	1.50027e-11	0.31908	0.194	0.118	3.59569e-07	cone PR2	PKN2
EPN2	1.54478e-11	0.324964	0.41	0.322	3.70237e-07	cone PR2	EPN2
IGSF211	1.70385e-11	0.285829	0.19	0.114	4.08362e-07	cone PR2	IGSF21
ZNF5163	1.97656e-11	0.313075	0.383	0.294	4.73723e-07	cone PR2	ZNF516
GPX1	1.99133e-11	0.281267	0.239	0.154	4.77262e-07	cone PR2	GPX1
CKAP42	2.03399e-11	0.323656	0.319	0.23	4.87486e-07	cone PR2	CKAP4
ZFAND31	2.59794e-11	0.293394	0.242	0.156	6.22648e-07	cone PR2	ZFAND3
KIF16B	2.62374e-11	0.26919	0.122	0.062	6.28832e-07	cone PR2	KIF16B
FDPS2	3.04091e-11	0.374516	0.401	0.318	7.28816e-07	cone PR2	FDPS
HMGCS1	3.23223e-11	0.35063	0.388	0.298	7.74668e-07	cone PR2	HMGCS1
CTBP22	4.15259e-11	0.276391	0.382	0.289	9.95252e-07	cone PR2	CTBP2
SLC4A3	4.37323e-11	0.260001	0.13	0.068	1.04813e-06	cone PR2	SLC4A3
GABARAPL11	5.04795e-11	0.323207	0.294	0.21	1.20984e-06	cone PR2	GABARAPL1
CASP6	6.02005e-11	0.289137	0.12	0.061	1.44283e-06	cone PR2	CASP6
MEA11	6.37979e-11	0.344608	0.333	0.248	1.52904e-06	cone PR2	MEA1
LSS	9.33465e-11	0.317411	0.152	0.085	2.23724e-06	cone PR2	LSS
DIP2B	1.21755e-10	0.303513	0.262	0.182	2.91811e-06	cone PR2	DIP2B
TAF7	1.24762e-10	0.33309	0.251	0.172	2.99018e-06	cone PR2	TAF7
NXN	1.28698e-10	0.251492	0.151	0.084	3.0845e-06	cone PR2	NXN
LAPTM4B1	1.35336e-10	0.327175	0.192	0.119	3.24359e-06	cone PR2	LAPTM4B
CZH9ORF401	1.4198e-10	0.295484	0.212	0.136	3.40283e-06	cone PR2	CZH9ORF40
ITM2B1	1.60521e-10	0.33801	0.401	0.331	3.84722e-06	cone PR2	ITM2B
SLC16A3	1.65551e-10	0.320924	0.246	0.165	3.96776e-06	cone PR2	SLC16A3
LOC420411	1.82364e-10	0.317022	0.172	0.102	4.37071e-06	cone PR2	LOC420411
AP3D11	2.0131e-10	0.296617	0.456	0.377	4.82481e-06	cone PR2	AP3D1
TMEM138	2.0878e-10	0.299716	0.218	0.142	5.00383e-06	cone PR2	TMEM138
KIFAP32	2.14639e-10	0.320914	0.319	0.236	5.14426e-06	cone PR2	KIFAP3
TDP11	2.16132e-10	0.268526	0.16	0.092	5.18003e-06	cone PR2	TDP1
TSC22D31	2.68969e-10	0.298217	0.208	0.133	6.44639e-06	cone PR2	TSC22D3
YTHDF2	2.69669e-10	0.320862	0.294	0.213	6.46315e-06	cone PR2	YTHDF2
AACS	4.79485e-10	0.273989	0.103	0.051	1.14918e-05	cone PR2	AACS
GNB5	5.97523e-10	0.295032	0.184	0.115	1.43208e-05	cone PR2	GNB5
RALGPS22	6.92814e-10	0.279918	0.431	0.357	1.66047e-05	cone PR2	RALGPS2
LOC417386	7.49291e-10	0.42929	0.204	0.132	1.79583e-05	cone PR2	LOC417386
LIMCH11	1.04617e-09	0.283397	0.194	0.122	2.50736e-05	cone PR2	LIMCH1
TP53INP13	1.38992e-09	0.252427	0.224	0.148	3.33123e-05	cone PR2	TP53INP1
FNIP2	1.43134e-09	0.303555	0.224	0.15	3.4305e-05	cone PR2	FNIP2
PAN3	1.4673e-09	0.273337	0.207	0.135	3.51668e-05	cone PR2	PAN3
DGKE2	1.64187e-09	0.32055	0.247	0.173	3.93508e-05	cone PR2	DGKE
CCDC85C2	1.77206e-09	0.302181	0.302	0.225	4.24709e-05	cone PR2	CCDC85C
INSIG11	2.61751e-09	0.318717	0.308	0.23	6.2734e-05	cone PR2	INSIG1
DIXDC13	2.96812e-09	0.286397	0.294	0.21	7.11368e-05	cone PR2	DIXDC1
TEAD12	4.84058e-09	0.338095	0.292	0.216	0.000116014	cone PR2	TEAD1
ENOPH1	6.0403e-09	0.306879	0.258	0.185	0.000144768	cone PR2	ENOPH1
MYO5C	6.22353e-09	0.271934	0.137	0.08	0.000149159	cone PR2	MYO5C
GATSL2	6.7997e-09	0.250482	0.145	0.086	0.000162968	cone PR2	GATSL2
SEZ61	6.97589e-09	0.287539	0.214	0.144	0.000167191	cone PR2	SEZ6
PHF201	8.11654e-09	0.265831	0.383	0.311	0.000194529	cone PR2	PHF20
CNPY21	8.2242e-09	0.266569	0.32	0.243	0.000197109	cone PR2	CNPY2
DACH13	8.8384e-09	0.280403	0.267	0.195	0.00021183	cone PR2	DACH1
ARHGAP12	9.10788e-09	0.264606	0.172	0.108	0.000218289	cone PR2	ARHGAP12
SPPL3	9.65532e-09	0.273681	0.239	0.167	0.000231409	cone PR2	SPPL3
ASH1L	9.67538e-09	0.268601	0.378	0.302	0.00023189	cone PR2	ASH1L
ZMYND11	9.74345e-09	0.269492	0.249	0.176	0.000233521	cone PR2	ZMYND11
CNOT6	1.03752e-08	0.276495	0.312	0.241	0.000248661	cone PR2	CNOT6
HNRNPDL	1.45654e-08	0.289477	0.27	0.199	0.000349089	cone PR2	HNRNPDL
CHMP5	1.82642e-08	0.293334	0.226	0.161	0.000437738	cone PR2	CHMP5
LOC107052740	1.99104e-08	0.320686	0.348	0.281	0.000477193	cone PR2	LOC107052740
LRRC3C3	2.25425e-08	0.265308	0.323	0.244	0.000540275	cone PR2	LRRC3C
APP2	2.55884e-08	0.259738	0.504	0.455	0.000613277	cone PR2	APP
WIPI11	2.71361e-08	0.26288	0.321	0.247	0.000650371	cone PR2	WIPI1
NCBP2	3.21244e-08	0.268662	0.332	0.261	0.000769925	cone PR2	NCBP2
RASSF22	3.58993e-08	0.259867	0.27	0.197	0.000860398	cone PR2	RASSF2
MFAP3L2	3.8099e-08	0.286753	0.184	0.122	0.000913119	cone PR2	MFAP3L
LOC107054741	5.56506e-08	0.313689	0.435	0.383	0.00133378	cone PR2	LOC107054741
DDIT34	6.10491e-08	0.41464	0.362	0.292	0.00146316	cone PR2	DDIT3
BCAT11	7.96059e-08	0.285587	0.203	0.139	0.00190792	cone PR2	BCAT1
MTFP11	8.2218e-08	0.296124	0.32	0.25	0.00197052	cone PR2	MTFP1
PCMTD1	1.1688e-07	0.258763	0.152	0.096	0.00280127	cone PR2	PCMTD1
SQLE	1.26299e-07	0.292335	0.18	0.122	0.003027	cone PR2	SQLE
PARP6	1.37946e-07	0.250264	0.177	0.118	0.00330615	cone PR2	PARP6
DOCK3	1.61404e-07	0.255243	0.187	0.126	0.00386836	cone PR2	DOCK3
ATP6V0A1	2.09906e-07	0.264271	0.167	0.11	0.00503081	cone PR2	ATP6V0A1
NAV12	2.48556e-07	0.263422	0.323	0.249	0.00595713	cone PR2	NAV1
DHCR7	2.70667e-07	0.259727	0.126	0.077	0.00648709	cone PR2	DHCR7
CREBRF	2.92637e-07	0.282569	0.172	0.115	0.00701363	cone PR2	CREBRF
RNF208	3.11489e-07	0.267452	0.222	0.159	0.00746545	cone PR2	RNF208
PAPD5	4.80368e-07	0.258465	0.285	0.219	0.011513	cone PR2	PAPD5
RAX24	5.29769e-07	0.287871	0.243	0.181	0.012697	cone PR2	RAX2
GTF2B	6.4166e-07	0.256173	0.212	0.154	0.0153787	cone PR2	GTF2B
TPD52L12	7.77808e-07	0.305348	0.141	0.091	0.0186417	cone PR2	TPD52L1
HSPA51	8.26751e-07	0.42194	0.417	0.367	0.0198147	cone PR2	HSPA5
MRPS36	8.82401e-07	0.254968	0.218	0.158	0.0211485	cone PR2	MRPS36
PPP1R12A	1.05804e-06	0.264334	0.272	0.21	0.0253579	cone PR2	PPP1R12A
BICD2	1.49575e-06	0.289223	0.192	0.137	0.0358486	cone PR2	BICD2
ABHD17A	1.49836e-06	0.251672	0.269	0.21	0.0359113	cone PR2	ABHD17A
CDKN1B	1.93262e-06	0.279836	0.366	0.317	0.0463192	cone PR2	CDKN1B
CCDC88C	2.05036e-06	0.26831	0.246	0.189	0.049141	cone PR2	CCDC88C
ARF61	2.4731e-06	0.263564	0.331	0.277	0.0592728	cone PR2	ARF6
PDIA6	4.23664e-06	0.259502	0.199	0.145	0.10154	cone PR2	PDIA6
LOC101750071	6.77312e-06	0.264146	0.136	0.09	0.162331	cone PR2	LOC101750071
LOC1008572992	1.30454e-05	0.321351	0.242	0.185	0.312659	cone PR2	LOC100857299
PYCR1	1.45514e-05	0.281249	0.133	0.089	0.348753	cone PR2	PYCR1
ARL6IP51	4.71009e-05	0.251409	0.224	0.176	1	cone PR2	ARL6IP5
KCTD201	5.60762e-05	0.260114	0.265	0.22	1	cone PR2	KCTD20
HSP90AA11	5.73874e-05	0.267798	0.453	0.426	1	cone PR2	HSP90AA1
ZC3H13	9.3497e-05	0.251335	0.517	0.498	1	cone PR2	ZC3H13
DYNC1I12	0.000683394	0.306943	0.254	0.221	1	cone PR2	DYNC1I1
ZNF217L1	0.00159901	0.251079	0.157	0.124	1	cone PR2	ZNF217L

## Sheet: cone hPC
	p_val	avg_logFC	pct.1	pct.2	p_val_adj	cluster	gene
RBP43	0	1.55824	0.999	0.286	0	cone hPCs	RBP4
RXRG3	0	1.36745	0.956	0.2	0	cone hPCs	RXRG
THRB3	0	1.30764	0.682	0.079	0	cone hPCs	THRB
KIF251	0	1.06851	0.499	0.048	0	cone hPCs	KIF25
SAMD10	0	0.870953	0.371	0.022	0	cone hPCs	SAMD10
ISL2	0	0.789543	0.385	0.039	0	cone hPCs	ISL2
PPP2R2B	0	0.77161	0.336	0.027	0	cone hPCs	PPP2R2B
IMPG23	5.97096e-302	0.906972	0.624	0.118	1.43106e-297	cone hPCs	IMPG2
EGFLAM2	8.4694e-266	0.70803	0.538	0.092	2.02986e-261	cone hPCs	EGFLAM
TOP2A3	3.21701e-260	1.01034	0.927	0.358	7.71021e-256	cone hPCs	TOP2A
BORL43	4.96928e-260	1.00718	0.924	0.357	1.19099e-255	cone hPCs	BORL4
SALL13	1.98157e-255	0.855519	0.519	0.097	4.74923e-251	cone hPCs	SALL1
UBE2C3	2.30687e-243	1.05939	0.893	0.349	5.52888e-239	cone hPCs	UBE2C
SHANK33	9.19117e-243	0.986032	0.601	0.149	2.20285e-238	cone hPCs	SHANK3
NUSAP13	1.16798e-238	0.973299	0.794	0.255	2.79931e-234	cone hPCs	NUSAP1
CKS1B3	5.04041e-231	0.950877	0.922	0.42	1.20804e-226	cone hPCs	CKS1B
CDCA33	1.25772e-230	0.942337	0.848	0.298	3.01437e-226	cone hPCs	CDCA3
H2AFV3	5.98707e-227	0.746207	1	0.907	1.43492e-222	cone hPCs	H2AFV
MKI673	1.5972e-224	0.927725	0.775	0.253	3.82801e-220	cone hPCs	MKI67
CAMK1D1	7.50983e-223	0.939283	0.55	0.13	1.79988e-218	cone hPCs	CAMK1D
TUBA1A12	1.3701e-211	0.821796	0.992	0.754	3.28372e-207	cone hPCs	TUBA1A1
SAMD73	8.87193e-207	0.692702	0.412	0.071	2.12633e-202	cone hPCs	SAMD7
NANOS11	1.39394e-206	1.00733	0.505	0.118	3.34086e-202	cone hPCs	NANOS1
FRMD12	3.25536e-206	0.802002	0.44	0.086	7.80212e-202	cone hPCs	FRMD1
LOC1017521063	1.42227e-201	0.695318	0.435	0.081	3.40874e-197	cone hPCs	LOC101752106
HMGB23	1.69775e-192	0.846028	0.961	0.53	4.06901e-188	cone hPCs	HMGB2
PRDM14	1.60929e-189	0.722032	0.662	0.195	3.85698e-185	cone hPCs	PRDM1
HMGB13	1.11538e-187	0.719606	0.983	0.813	2.67324e-183	cone hPCs	HMGB1
SMC23	5.84854e-185	0.88312	0.597	0.177	1.40172e-180	cone hPCs	SMC2
CENPF3	1.04777e-184	0.912868	0.744	0.265	2.51119e-180	cone hPCs	CENPF
INCENP3	1.61376e-174	0.756897	0.626	0.194	3.86769e-170	cone hPCs	INCENP
TPBGL1	8.13878e-174	0.756673	0.333	0.056	1.95062e-169	cone hPCs	TPBGL
CDK13	7.15931e-170	0.715299	0.711	0.241	1.71587e-165	cone hPCs	CDK1
GSTAL22	3.64759e-169	0.729379	0.363	0.07	8.74218e-165	cone hPCs	GSTAL2
NTM1	3.18341e-168	0.709983	0.656	0.212	7.62968e-164	cone hPCs	NTM
PTGFRN	3.76611e-168	0.616313	0.288	0.044	9.02623e-164	cone hPCs	PTGFRN
UBE2T1	5.1332e-168	0.655778	0.39	0.082	1.23027e-163	cone hPCs	UBE2T
LOC1070500243	7.30732e-168	0.819458	0.735	0.284	1.75135e-163	cone hPCs	LOC107050024
BIRC53	1.43294e-167	0.792455	0.654	0.221	3.43433e-163	cone hPCs	BIRC5
ASPM3	1.32006e-166	0.896987	0.678	0.248	3.16379e-162	cone hPCs	ASPM
ADAMTS33	6.3205e-166	0.691787	0.602	0.179	1.51483e-161	cone hPCs	ADAMTS3
KCNH72	5.06858e-163	0.793035	0.469	0.12	1.21479e-158	cone hPCs	KCNH7
KIF4A3	2.36064e-161	0.745367	0.759	0.287	5.65775e-157	cone hPCs	KIF4A
HMGN43	5.51525e-159	0.690937	0.962	0.636	1.32184e-154	cone hPCs	HMGN4
KRAS3	1.39008e-154	0.766334	0.773	0.358	3.3316e-150	cone hPCs	KRAS
TMEM108	1.49111e-152	0.472351	0.21	0.024	3.57374e-148	cone hPCs	TMEM108
CKAP23	4.88791e-151	0.727349	0.713	0.265	1.17149e-146	cone hPCs	CKAP2
NFASC2	2.05328e-150	0.736217	0.731	0.292	4.9211e-146	cone hPCs	NFASC
TPX23	3.04333e-150	0.721351	0.718	0.275	7.29396e-146	cone hPCs	TPX2
KIFC1L3	4.36271e-150	0.760166	0.578	0.19	1.04561e-145	cone hPCs	KIFC1L
SPDL13	5.5409e-150	0.759213	0.481	0.138	1.32799e-145	cone hPCs	SPDL1
RAPGEF52	3.42423e-149	0.610439	0.344	0.068	8.20684e-145	cone hPCs	RAPGEF5
CCNB23	4.24295e-145	0.749021	0.586	0.204	1.01691e-140	cone hPCs	CCNB2
CENPE3	1.29488e-144	0.718192	0.483	0.141	3.10343e-140	cone hPCs	CENPE
PLEKHG52	1.64535e-143	0.567588	0.357	0.075	3.94342e-139	cone hPCs	PLEKHG5
PLK13	7.40564e-142	0.720392	0.557	0.18	1.77491e-137	cone hPCs	PLK1
CENPW3	5.34164e-140	0.703437	0.517	0.162	1.28023e-135	cone hPCs	CENPW
SPAG52	1.42535e-138	0.695449	0.861	0.444	3.41613e-134	cone hPCs	SPAG5
PRC13	1.80499e-137	0.753893	0.573	0.196	4.32603e-133	cone hPCs	PRC1
CNGA3	1.27745e-136	0.402985	0.162	0.015	3.06168e-132	cone hPCs	CNGA3
MXD33	5.12829e-133	0.723601	0.577	0.2	1.2291e-128	cone hPCs	MXD3
OTX21	1.2917e-130	0.572097	0.986	0.591	3.09582e-126	cone hPCs	OTX2
NDUFA133	3.57557e-130	0.662687	0.936	0.73	8.56956e-126	cone hPCs	NDUFA13
LBR3	4.98969e-128	0.629434	0.924	0.61	1.19588e-123	cone hPCs	LBR
DCK3	2.98851e-127	0.615583	0.527	0.172	7.16257e-123	cone hPCs	DCK
SGO13	6.84227e-127	0.639899	0.462	0.138	1.63989e-122	cone hPCs	SGO1
MEIS22	2.56766e-125	0.671904	0.656	0.269	6.15391e-121	cone hPCs	MEIS2
KPNA23	7.90112e-125	0.713977	0.591	0.217	1.89366e-120	cone hPCs	KPNA2
PIBPPDD4L3	4.07546e-121	0.625737	0.658	0.264	9.76764e-117	cone hPCs	PIBPPDD4L
CLSTN13	2.37553e-119	0.547987	0.914	0.623	5.69344e-115	cone hPCs	CLSTN1
PBK3	4.6376e-119	0.60405	0.468	0.146	1.11149e-114	cone hPCs	PBK
TACC33	1.02941e-118	0.628396	0.485	0.158	2.4672e-114	cone hPCs	TACC3
RRM23	2.69792e-118	0.749851	0.451	0.142	6.46609e-114	cone hPCs	RRM2
TMPO3	6.06691e-118	0.655608	0.691	0.305	1.45406e-113	cone hPCs	TMPO
UHRF13	8.10318e-118	0.662653	0.597	0.23	1.94209e-113	cone hPCs	UHRF1
MAD2L13	6.15452e-117	0.618463	0.514	0.179	1.47505e-112	cone hPCs	MAD2L1
FAM53B3	6.68467e-116	0.594799	0.668	0.278	1.60211e-111	cone hPCs	FAM53B
DLGAP53	1.01271e-115	0.670173	0.469	0.153	2.42716e-111	cone hPCs	DLGAP5
RIMS11	3.36846e-113	0.488952	0.258	0.05	8.07318e-109	cone hPCs	RIMS1
NPDC12	2.89158e-112	0.57195	0.668	0.286	6.93025e-108	cone hPCs	NPDC1
CDC203	6.83675e-112	0.734348	0.54	0.198	1.63856e-107	cone hPCs	CDC20
KIFC13	1.46068e-109	0.592287	0.475	0.16	3.5008e-105	cone hPCs	KIFC1
RAD213	2.06155e-108	0.661527	0.719	0.358	4.94092e-104	cone hPCs	RAD21
NNF13	2.12241e-108	0.621223	0.56	0.219	5.08677e-104	cone hPCs	NNF1
NR2E32	1.768e-107	0.430037	0.294	0.065	4.23736e-103	cone hPCs	NR2E3
FBXO393	2.21536e-107	0.540223	0.346	0.092	5.30956e-103	cone hPCs	FBXO39
AURKA3	2.5703e-107	0.624811	0.405	0.125	6.16024e-103	cone hPCs	AURKA
GPC23	8.48005e-107	0.520049	0.39	0.11	2.03241e-102	cone hPCs	GPC2
G2E33	3.20498e-105	0.638391	0.489	0.176	7.68137e-101	cone hPCs	G2E3
SH3KBP12	3.87517e-105	0.559009	0.463	0.155	9.28763e-101	cone hPCs	SH3KBP1
KIF20A3	5.0999e-105	0.603092	0.409	0.127	1.22229e-100	cone hPCs	KIF20A
DRAXIN	2.10601e-104	0.377211	0.139	0.015	5.04748e-100	cone hPCs	DRAXIN
OSBPL1A	1.05744e-103	0.442125	0.21	0.037	2.53435e-99	cone hPCs	OSBPL1A
CDC42BPA1	2.32074e-103	0.639397	0.512	0.194	5.56213e-99	cone hPCs	CDC42BPA
CCSAP3	2.62486e-102	0.616012	0.379	0.114	6.29101e-98	cone hPCs	CCSAP
BUB1B3	3.82206e-102	0.646707	0.53	0.204	9.16033e-98	cone hPCs	BUB1B
NEK23	3.11964e-101	0.596167	0.378	0.113	7.47685e-97	cone hPCs	NEK2
NASP3	6.81598e-101	0.703577	0.736	0.391	1.63359e-96	cone hPCs	NASP
FAM72A3	1.14146e-99	0.605838	0.403	0.129	2.73573e-95	cone hPCs	FAM72A
CBFA2T32	1.68675e-99	0.543064	0.603	0.242	4.04263e-95	cone hPCs	CBFA2T3
ABCA4	1.51229e-98	0.324059	0.135	0.015	3.62452e-94	cone hPCs	ABCA4
H2AFZ3	7.07692e-98	0.490605	0.949	0.71	1.69613e-93	cone hPCs	H2AFZ
FSTL52	7.95085e-98	0.574009	0.675	0.306	1.90558e-93	cone hPCs	FSTL5
RRM13	1.69468e-97	0.588511	0.506	0.193	4.06163e-93	cone hPCs	RRM1
ARHGAP11A3	7.70812e-97	0.589683	0.383	0.12	1.84741e-92	cone hPCs	ARHGAP11A
ARHGAP24	1.90685e-96	0.405779	0.184	0.03	4.57015e-92	cone hPCs	ARHGAP24
KIF2C3	2.03809e-96	0.605257	0.395	0.128	4.8847e-92	cone hPCs	KIF2C
CENPH3	1.2557e-94	0.545664	0.387	0.124	3.00954e-90	cone hPCs	CENPH
ANKLE1	1.11947e-93	0.454294	0.237	0.052	2.68304e-89	cone hPCs	ANKLE1
HIST1H1033	8.673e-93	0.911553	0.851	0.652	2.07866e-88	cone hPCs	HIST1H103
HMMR3	2.24657e-91	0.582368	0.379	0.122	5.38435e-87	cone hPCs	HMMR
MIS18BP13	3.34235e-91	0.563481	0.398	0.134	8.0106e-87	cone hPCs	MIS18BP1
TTK3	1.25901e-90	0.504169	0.353	0.108	3.01746e-86	cone hPCs	TTK
DEK3	1.8725e-90	0.563487	0.62	0.283	4.48782e-86	cone hPCs	DEK
ROBO22	3.11784e-90	0.548444	0.735	0.399	7.47252e-86	cone hPCs	ROBO2
HMGN53	5.0659e-89	0.459296	0.95	0.736	1.21414e-84	cone hPCs	HMGN5
NRN1L3	1.00459e-87	0.483454	0.455	0.163	2.4077e-83	cone hPCs	NRN1L
DUT3	2.002e-86	0.646226	0.449	0.172	4.7982e-82	cone hPCs	DUT
PLK43	3.99286e-86	0.509761	0.322	0.097	9.5697e-82	cone hPCs	PLK4
HELLS3	4.61198e-86	0.561546	0.421	0.153	1.10535e-81	cone hPCs	HELLS
GPR271	1.1938e-85	0.570897	0.479	0.189	2.86119e-81	cone hPCs	GPR27
ATAD2	2.11509e-85	0.440283	0.249	0.061	5.06924e-81	cone hPCs	ATAD2
BMP7	5.89924e-85	0.472258	0.193	0.038	1.41387e-80	cone hPCs	BMP7
MAK	1.14792e-82	0.353698	0.175	0.031	2.75123e-78	cone hPCs	MAK
PTBP31	5.49289e-82	0.476661	0.251	0.063	1.31648e-77	cone hPCs	PTBP3
NCAPH4	6.45287e-82	0.508079	0.409	0.147	1.54656e-77	cone hPCs	NCAPH
KIF153	8.55522e-80	0.500017	0.333	0.106	2.05043e-75	cone hPCs	KIF15
NUCKS13	1.56099e-79	0.497841	0.878	0.61	3.74123e-75	cone hPCs	NUCKS1
LIMCH1	2.61912e-79	0.483157	0.336	0.108	6.27724e-75	cone hPCs	LIMCH1
PTPRM	5.48026e-79	0.359719	0.193	0.039	1.31345e-74	cone hPCs	PTPRM
YBX32	2.37981e-78	0.498391	0.701	0.376	5.7037e-74	cone hPCs	YBX3
SMC43	3.57867e-78	0.520553	0.428	0.164	8.577e-74	cone hPCs	SMC4
EZR2	4.21221e-78	0.50973	0.472	0.191	1.00954e-73	cone hPCs	EZR
KNSTRN3	2.21717e-77	0.491171	0.454	0.178	5.3139e-73	cone hPCs	KNSTRN
RP1	2.52754e-77	0.312113	0.161	0.028	6.05775e-73	cone hPCs	RP1
RASSF83	3.00636e-77	0.387901	0.309	0.09	7.20535e-73	cone hPCs	RASSF8
CCSER13	8.68279e-77	0.510246	0.652	0.32	2.081e-72	cone hPCs	CCSER1
NCAPD23	6.45769e-76	0.502523	0.361	0.127	1.54772e-71	cone hPCs	NCAPD2
MFAP3L1	7.41008e-76	0.475994	0.332	0.107	1.77597e-71	cone hPCs	MFAP3L
SPC253	1.34845e-75	0.490926	0.473	0.192	3.23183e-71	cone hPCs	SPC25
PNRC23	2.92931e-75	0.522388	0.616	0.307	7.02068e-71	cone hPCs	PNRC2
TWF12	1.26317e-74	0.461081	0.332	0.108	3.02745e-70	cone hPCs	TWF1
CDKN32	2.18205e-74	0.457127	0.28	0.083	5.22973e-70	cone hPCs	CDKN3
CCDC85C	2.65075e-74	0.513187	0.487	0.207	6.35306e-70	cone hPCs	CCDC85C
RACGAP13	4.87085e-74	0.491273	0.386	0.142	1.1674e-69	cone hPCs	RACGAP1
NDC803	2.00715e-73	0.504114	0.327	0.109	4.81052e-69	cone hPCs	NDC80
TUBB4B3	2.57877e-73	0.394142	0.91	0.636	6.18053e-69	cone hPCs	TUBB4B
GPSM23	3.05526e-73	0.500738	0.399	0.152	7.32255e-69	cone hPCs	GPSM2
GTSE12	5.1498e-73	0.436407	0.256	0.072	1.23425e-68	cone hPCs	GTSE1
C14H16orf59	5.45991e-73	0.380343	0.153	0.028	1.30858e-68	cone hPCs	C14H16orf59
NET13	8.19517e-73	0.482987	0.336	0.114	1.96414e-68	cone hPCs	NET1
BRCA13	1.36084e-72	0.464568	0.32	0.105	3.26153e-68	cone hPCs	BRCA1
WEE13	1.47786e-72	0.500227	0.374	0.136	3.542e-68	cone hPCs	WEE1
CKAP53	3.65867e-72	0.542793	0.584	0.291	8.76873e-68	cone hPCs	CKAP5
TERF13	6.58858e-71	0.442671	0.301	0.097	1.57908e-66	cone hPCs	TERF1
NAP1L13	7.44241e-71	0.516699	0.821	0.545	1.78372e-66	cone hPCs	NAP1L1
KIT	9.0176e-71	0.282414	0.136	0.022	2.16125e-66	cone hPCs	KIT
FEN13	1.22369e-70	0.490234	0.406	0.16	2.93282e-66	cone hPCs	FEN1
PTPRG1	1.47784e-70	0.440967	0.318	0.103	3.54193e-66	cone hPCs	PTPRG
PPP2R5A1	2.25601e-70	0.522397	0.467	0.204	5.40698e-66	cone hPCs	PPP2R5A
SPC243	2.45046e-70	0.488717	0.395	0.154	5.87302e-66	cone hPCs	SPC24
NMRK23	8.36335e-70	0.465595	0.571	0.267	2.00444e-65	cone hPCs	NMRK2
CENPA3	1.47642e-68	0.460473	0.459	0.19	3.53853e-64	cone hPCs	CENPA
MAP23	1.86665e-68	0.411074	0.893	0.617	4.47381e-64	cone hPCs	MAP2
H1FX3	2.81112e-68	0.437589	0.902	0.658	6.7374e-64	cone hPCs	H1FX
H2A2BL3	3.75165e-68	0.408773	0.855	0.591	8.99157e-64	cone hPCs	H2A2BL
MRPL513	1.5904e-67	0.473674	0.82	0.557	3.81171e-63	cone hPCs	MRPL51
UBE2S3	3.08779e-67	0.512307	0.557	0.271	7.40052e-63	cone hPCs	UBE2S
DACT23	1.3269e-66	0.522311	0.338	0.121	3.18018e-62	cone hPCs	DACT2
CNRIP1	3.75385e-66	0.332024	0.169	0.037	8.99686e-62	cone hPCs	CNRIP1
NCAPH22	2.74165e-65	0.415431	0.254	0.077	6.57091e-61	cone hPCs	NCAPH2
AADACL4L3	4.63093e-65	0.296159	0.104	0.014	1.1099e-60	cone hPCs	AADACL4L3
AJAP1	7.56914e-65	0.349987	0.156	0.032	1.81409e-60	cone hPCs	AJAP1
CSNK1G11	9.32633e-65	0.443193	0.778	0.507	2.23524e-60	cone hPCs	CSNK1G1
HINTW	1.169e-63	0.278045	0.998	0.995	2.80174e-59	cone hPCs	HINTW
HNRNPA31	3.07216e-63	0.395076	0.948	0.794	7.36304e-59	cone hPCs	HNRNPA3
HTRA12	4.88808e-63	0.420913	0.371	0.141	1.17153e-58	cone hPCs	HTRA1
KIF18A3	1.1126e-62	0.42662	0.271	0.088	2.66657e-58	cone hPCs	KIF18A
C1GALT1	1.4333e-62	0.426388	0.25	0.076	3.43519e-58	cone hPCs	C1GALT1
2019-09-07	1.49163e-62	0.490516	0.706	0.433	3.57498e-58	cone hPCs	2019-09-07
LOC112529963	2.26391e-62	0.377911	0.142	0.028	5.42591e-58	cone hPCs	LOC112529963
BUB13	3.11953e-62	0.43504	0.306	0.108	7.47658e-58	cone hPCs	BUB1
NSMCE3	3.2178e-62	0.5136	0.526	0.265	7.71209e-58	cone hPCs	NSMCE3
PTTG13	3.7615e-62	0.54162	0.396	0.163	9.01518e-58	cone hPCs	PTTG1
LOC112532722	5.00385e-62	0.273486	0.11	0.017	1.19927e-57	cone hPCs	LOC112532722
TNFRSF212	5.40482e-62	0.40383	0.357	0.132	1.29537e-57	cone hPCs	TNFRSF21
CENPT2	2.43394e-61	0.467429	0.269	0.089	5.83343e-57	cone hPCs	CENPT
LOC1070498622	2.46724e-60	0.584364	0.395	0.173	5.91324e-56	cone hPCs	LOC107049862
HNRNPD1	3.00936e-60	0.515486	0.603	0.338	7.21252e-56	cone hPCs	HNRNPD
USP13	3.3117e-60	0.49457	0.441	0.198	7.93715e-56	cone hPCs	USP1
TICRR3	8.79578e-59	0.4033	0.259	0.085	2.10808e-54	cone hPCs	TICRR
KNTC1	9.14737e-59	0.377101	0.193	0.051	2.19235e-54	cone hPCs	KNTC1
E2F83	1.20535e-58	0.40106	0.273	0.091	2.88886e-54	cone hPCs	E2F8
ATAD53	2.56086e-58	0.441447	0.315	0.116	6.13761e-54	cone hPCs	ATAD5
SEPW12	6.44968e-58	0.383197	0.9	0.706	1.54579e-53	cone hPCs	SEPW1
HNRNPA2B1	1.72233e-57	0.355365	0.931	0.806	4.1279e-53	cone hPCs	HNRNPA2B1
HAUS1	1.81688e-57	0.33749	0.186	0.049	4.35451e-53	cone hPCs	HAUS1
ITGA112	1.9423e-57	0.355461	0.258	0.082	4.65511e-53	cone hPCs	ITGA11
KNL13	2.03683e-57	0.448352	0.286	0.101	4.88168e-53	cone hPCs	KNL1
HISTH12	1.46258e-56	0.49452	0.363	0.151	3.50537e-52	cone hPCs	HISTH1
EPHA31	1.55902e-56	0.40848	0.379	0.154	3.73651e-52	cone hPCs	EPHA3
TPD52L1	2.69678e-56	0.439064	0.248	0.08	6.46338e-52	cone hPCs	TPD52L1
CDCA23	4.14127e-56	0.387122	0.245	0.079	9.92539e-52	cone hPCs	CDCA2
GRIK12	4.54425e-56	0.331216	0.222	0.065	1.08912e-51	cone hPCs	GRIK1
KIF233	1.30228e-55	0.40357	0.249	0.082	3.12118e-51	cone hPCs	KIF23
DSN13	3.85621e-55	0.443142	0.479	0.227	9.24217e-51	cone hPCs	DSN1
DNAJC92	7.84111e-55	0.492065	0.379	0.166	1.87928e-50	cone hPCs	DNAJC9
HNRNPA03	1.91763e-54	0.426059	0.821	0.582	4.59597e-50	cone hPCs	HNRNPA0
NDRG11	4.20881e-54	0.449811	0.352	0.143	1.00873e-49	cone hPCs	NDRG1
LOC107053499	4.39424e-54	0.296398	0.173	0.044	1.05317e-49	cone hPCs	LOC107053499
RP1L1	1.87336e-53	0.277521	0.105	0.018	4.48989e-49	cone hPCs	RP1L1
SUMO33	2.26188e-53	0.460457	0.726	0.487	5.42104e-49	cone hPCs	SUMO3
CBX53	5.93837e-53	0.421473	0.704	0.428	1.42325e-48	cone hPCs	CBX5
CEP551	1.99443e-52	0.382581	0.219	0.069	4.78006e-48	cone hPCs	CEP55
DHRS3	2.38752e-52	0.461887	0.307	0.118	5.72216e-48	cone hPCs	DHRS3
SAPCD21	3.38181e-52	0.414908	0.344	0.14	8.10518e-48	cone hPCs	SAPCD2
2019-03-11	4.25569e-52	0.349631	0.251	0.083	1.01996e-47	cone hPCs	2019-03-01
TUB	4.53025e-52	0.36758	0.322	0.124	1.08577e-47	cone hPCs	TUB
TXNRD1	6.56403e-52	0.2897	0.133	0.029	1.5732e-47	cone hPCs	TXNRD1
TKT	6.96754e-52	0.444679	0.491	0.248	1.66991e-47	cone hPCs	TKT
LOC107052453	9.93663e-52	0.260537	0.145	0.033	2.38151e-47	cone hPCs	LOC107052453
PDE6B1	1.03892e-51	0.291452	0.143	0.032	2.48999e-47	cone hPCs	PDE6B
CCNB3	1.64579e-51	0.353733	0.18	0.051	3.94446e-47	cone hPCs	CCNB3
CENPS3	2.27011e-51	0.384488	0.339	0.138	5.44077e-47	cone hPCs	CENPS
LOC424401	2.9676e-51	0.400884	0.284	0.106	7.11246e-47	cone hPCs	LOC424401
NCAPD33	1.11826e-50	0.378846	0.248	0.086	2.68014e-46	cone hPCs	NCAPD3
TRAIP1	1.69906e-50	0.379123	0.209	0.066	4.07214e-46	cone hPCs	TRAIP
MAP4K42	5.66251e-49	0.33069	0.902	0.744	1.35713e-44	cone hPCs	MAP4K4
PTPN133	1.15017e-48	0.302447	0.227	0.074	2.75661e-44	cone hPCs	PTPN13
HYLS13	1.51247e-48	0.418524	0.352	0.153	3.62494e-44	cone hPCs	HYLS1
KIF143	1.62561e-48	0.383864	0.251	0.09	3.89609e-44	cone hPCs	KIF14
NHSL12	2.26483e-48	0.34879	0.547	0.283	5.42813e-44	cone hPCs	NHSL1
PCNT2	5.97686e-48	0.406357	0.365	0.161	1.43248e-43	cone hPCs	PCNT
NIN1	8.25654e-48	0.420025	0.4	0.185	1.97885e-43	cone hPCs	NIN
CALM23	8.99171e-48	0.43942	0.716	0.472	2.15504e-43	cone hPCs	CALM2
HJURP1	9.33092e-48	0.351076	0.213	0.07	2.23634e-43	cone hPCs	HJURP
SAP303	2.43835e-47	0.439539	0.376	0.173	5.84399e-43	cone hPCs	SAP30
POU2F1	3.27203e-47	0.423158	0.507	0.27	7.84208e-43	cone hPCs	POU2F1
ARL4A3	4.59473e-47	0.376219	0.43	0.206	1.10122e-42	cone hPCs	ARL4A
SKA22	5.02766e-47	0.434369	0.438	0.219	1.20498e-42	cone hPCs	SKA2
TSC22D11	5.35769e-47	0.405178	0.842	0.675	1.28408e-42	cone hPCs	TSC22D1
ESPL13	5.84157e-47	0.385077	0.302	0.122	1.40005e-42	cone hPCs	ESPL1
CENPC2	7.34327e-47	0.346253	0.22	0.074	1.75996e-42	cone hPCs	CENPC
NDC13	1.43221e-46	0.371531	0.238	0.085	3.43258e-42	cone hPCs	NDC1
KMT5A2	1.88078e-46	0.453327	0.289	0.118	4.50767e-42	cone hPCs	KMT5A
DEPDC1B	2.03488e-46	0.306288	0.16	0.044	4.87699e-42	cone hPCs	DEPDC1B
LOC1070492573	3.07424e-46	0.371827	0.288	0.115	7.36804e-42	cone hPCs	LOC107049257
COBLL12	3.94769e-46	0.368153	0.288	0.114	9.46143e-42	cone hPCs	COBLL1
PPL	6.8757e-46	0.320372	0.15	0.039	1.6479e-41	cone hPCs	PPL
WTIP2	1.66585e-45	0.387392	0.336	0.145	3.99253e-41	cone hPCs	WTIP
C1orf1671	2.20622e-45	0.314727	0.179	0.053	5.28765e-41	cone hPCs	C1orf167
LOC1070526821	2.46642e-45	0.305576	0.118	0.026	5.91126e-41	cone hPCs	LOC107052682
FANCG	2.6023e-45	0.283653	0.146	0.038	6.23694e-41	cone hPCs	FANCG
KIF20B3	7.40815e-45	0.383483	0.289	0.116	1.77551e-40	cone hPCs	KIF20B
CPE1	9.06173e-45	0.357601	0.757	0.512	2.17182e-40	cone hPCs	CPE
CDC42BPB2	1.13583e-44	0.330769	0.706	0.446	2.72224e-40	cone hPCs	CDC42BPB
ANP32E1	2.10207e-44	0.382011	0.726	0.483	5.03804e-40	cone hPCs	ANP32E
ARL6IP12	3.52271e-44	0.468671	0.5	0.279	8.44287e-40	cone hPCs	ARL6IP1
PDZD113	8.1686e-44	0.38362	0.382	0.179	1.95777e-39	cone hPCs	PDZD11
MTPN1	1.18325e-43	0.4207	0.63	0.391	2.8359e-39	cone hPCs	MTPN
HSTH2B72	1.27661e-43	0.417206	0.219	0.077	3.05965e-39	cone hPCs	HSTH2B7
ATP11A3	1.43504e-43	0.265454	0.316	0.127	3.43936e-39	cone hPCs	ATP11A
FAM83D3	1.59711e-43	0.365424	0.252	0.096	3.8278e-39	cone hPCs	FAM83D
NCAPG2	2.66393e-43	0.328059	0.216	0.075	6.38463e-39	cone hPCs	NCAPG
TUBB1	2.71381e-43	0.318653	0.931	0.799	6.50418e-39	cone hPCs	TUBB
SNRPE3	3.69206e-43	0.347602	0.835	0.631	8.84875e-39	cone hPCs	SNRPE
TEAD11	4.66695e-43	0.413881	0.411	0.204	1.11853e-38	cone hPCs	TEAD1
CETN3	5.07903e-43	0.366982	0.308	0.13	1.21729e-38	cone hPCs	CETN3
REV1	1.15819e-41	0.334458	0.242	0.091	2.77583e-37	cone hPCs	REV1
NEUROD11	2.20972e-41	0.322242	0.274	0.109	5.29604e-37	cone hPCs	NEUROD1
ENO11	2.40256e-41	0.302865	0.985	0.91	5.75821e-37	cone hPCs	ENO1
PSD2	3.11562e-41	0.285409	0.174	0.054	7.4672e-37	cone hPCs	PSD2
KATNA11	3.33152e-41	0.32588	0.205	0.071	7.98466e-37	cone hPCs	KATNA1
BAZ1B2	7.43874e-41	0.377245	0.52	0.292	1.78284e-36	cone hPCs	BAZ1B
KCTD3	7.56871e-41	0.314624	0.243	0.092	1.81399e-36	cone hPCs	KCTD3
KIF113	7.62469e-41	0.346158	0.256	0.102	1.82741e-36	cone hPCs	KIF11
NUP1602	1.10095e-40	0.387322	0.383	0.185	2.63864e-36	cone hPCs	NUP160
PRR11	1.15669e-40	0.296148	0.154	0.045	2.77223e-36	cone hPCs	PRR11
ACSF2	1.54203e-40	0.297263	0.148	0.042	3.69578e-36	cone hPCs	ACSF2
TRHDE1	2.16071e-40	0.269014	0.347	0.153	5.17857e-36	cone hPCs	TRHDE
CDT1	8.13392e-40	0.375609	0.195	0.068	1.94946e-35	cone hPCs	CDT1
TCF123	1.08098e-39	0.328627	0.761	0.52	2.59078e-35	cone hPCs	TCF12
ANLN3	1.37886e-39	0.323207	0.218	0.08	3.30472e-35	cone hPCs	ANLN
B4GALT62	1.75743e-39	0.372727	0.267	0.111	4.21204e-35	cone hPCs	B4GALT6
XPO1	2.27001e-39	0.399051	0.602	0.373	5.44054e-35	cone hPCs	XPO1
MIS18A3	2.91919e-39	0.33461	0.233	0.09	6.99642e-35	cone hPCs	MIS18A
EML52	3.12921e-39	0.27474	0.274	0.108	7.49977e-35	cone hPCs	EML5
CKAP2L1	3.19789e-39	0.318625	0.263	0.107	7.66438e-35	cone hPCs	CKAP2L
EEF1B2	6.41625e-39	0.258506	0.979	0.92	1.53778e-34	cone hPCs	EEF1B2
FOXO31	6.44081e-39	0.339567	0.418	0.21	1.54367e-34	cone hPCs	FOXO3
ATP2A2	1.11394e-38	0.381682	0.488	0.272	2.66978e-34	cone hPCs	ATP2A2
NUP501	1.48384e-38	0.390717	0.389	0.197	3.55633e-34	cone hPCs	NUP50
FAM76B	1.68756e-38	0.366115	0.364	0.174	4.04458e-34	cone hPCs	FAM76B
CNTN11	2.12967e-38	0.327683	0.211	0.078	5.10417e-34	cone hPCs	CNTN1
NDUFA111	2.39174e-38	0.362216	0.52	0.299	5.73229e-34	cone hPCs	NDUFA11
TYMS3	2.52836e-38	0.367908	0.32	0.146	6.05972e-34	cone hPCs	TYMS
RGCC3	2.65232e-38	0.300551	0.289	0.122	6.35681e-34	cone hPCs	RGCC
DIAPH32	3.26461e-38	0.309608	0.218	0.081	7.82428e-34	cone hPCs	DIAPH3
ACAP2	3.44806e-38	0.255308	0.15	0.045	8.26396e-34	cone hPCs	ACAP2
WDYHV1	3.6706e-38	0.269121	0.159	0.049	8.79733e-34	cone hPCs	WDYHV1
ZNF367	5.14132e-38	0.319015	0.181	0.062	1.23222e-33	cone hPCs	ZNF367
HP1BP31	7.18125e-38	0.384865	0.577	0.353	1.72113e-33	cone hPCs	HP1BP3
LOC112532151	8.59833e-38	0.318136	0.237	0.092	2.06076e-33	cone hPCs	LOC112532151
RHOA1	9.65807e-38	0.323434	0.833	0.633	2.31475e-33	cone hPCs	RHOA
POLA1	2.72659e-37	0.308406	0.206	0.076	6.53482e-33	cone hPCs	POLA1
ERH1	2.9057e-37	0.350617	0.807	0.604	6.96409e-33	cone hPCs	ERH
ATP2B41	3.18506e-37	0.339543	0.594	0.359	7.63362e-33	cone hPCs	ATP2B4
ARHGAP192	4.1941e-37	0.333007	0.256	0.106	1.0052e-32	cone hPCs	ARHGAP19
IGDCC3	4.84097e-37	0.339739	0.224	0.087	1.16024e-32	cone hPCs	IGDCC3
2019-09-11	5.42261e-37	0.371467	0.424	0.224	1.29964e-32	cone hPCs	2019-09-11
RAVER2	5.67396e-37	0.32363	0.213	0.08	1.35988e-32	cone hPCs	RAVER2
CARMIL33	8.78121e-37	0.389589	0.411	0.215	2.10459e-32	cone hPCs	CARMIL3
TNFAIP8L13	1.08813e-36	0.363516	0.229	0.091	2.60791e-32	cone hPCs	TNFAIP8L1
LOC107057188	1.12542e-36	0.257522	0.137	0.04	2.69729e-32	cone hPCs	LOC107057188
LMNB23	1.23081e-36	0.345813	0.462	0.251	2.94988e-32	cone hPCs	LMNB2
ARL9	1.497e-36	0.3131	0.332	0.154	3.58786e-32	cone hPCs	ARL9
NUDT11	1.53133e-36	0.357396	0.348	0.169	3.67013e-32	cone hPCs	NUDT1
KIAA0753	1.55149e-36	0.301972	0.195	0.071	3.71847e-32	cone hPCs	KIAA0753
PSAT1	2.08194e-36	0.314175	0.177	0.06	4.98978e-32	cone hPCs	PSAT1
MIF	3.46876e-36	0.308151	0.903	0.772	8.31359e-32	cone hPCs	MIF
TALDO13	8.2803e-36	0.417733	0.469	0.264	1.98454e-31	cone hPCs	TALDO1
FBXO52	9.43579e-36	0.370846	0.225	0.09	2.26148e-31	cone hPCs	FBXO5
CKS23	1.13688e-35	0.326368	0.323	0.151	2.72477e-31	cone hPCs	CKS2
HOOK1	1.14957e-35	0.308595	0.187	0.067	2.75517e-31	cone hPCs	HOOK1
TAF103	2.15556e-35	0.332752	0.672	0.445	5.16624e-31	cone hPCs	TAF10
TMEM135	3.15661e-35	0.282642	0.237	0.094	7.56544e-31	cone hPCs	TMEM135
SCG31	5.77684e-35	0.276356	0.475	0.253	1.38454e-30	cone hPCs	SCG3
RAB11FIP41	1.17608e-34	0.281761	0.328	0.154	2.8187e-30	cone hPCs	RAB11FIP4
EPB412	1.44019e-34	0.310823	0.739	0.514	3.4517e-30	cone hPCs	EPB41
ANP32B	3.75987e-34	0.288294	0.876	0.725	9.01128e-30	cone hPCs	ANP32B
IDI12	3.98164e-34	0.32596	0.338	0.162	9.5428e-30	cone hPCs	IDI1
HSPD1	4.91667e-34	0.348127	0.44	0.242	1.17838e-29	cone hPCs	HSPD1
SMAD73	5.18385e-34	0.294565	0.373	0.184	1.24241e-29	cone hPCs	SMAD7
MAST2	5.7873e-34	0.322929	0.333	0.16	1.38704e-29	cone hPCs	MAST2
HMGN33	8.40845e-34	0.323932	0.512	0.297	2.01525e-29	cone hPCs	HMGN3
MTCL12	1.21767e-33	0.273296	0.232	0.095	2.91839e-29	cone hPCs	MTCL1
CHAF1A	1.29337e-33	0.308901	0.216	0.086	3.09983e-29	cone hPCs	CHAF1A
PIGBOS11	2.12458e-33	0.378538	0.742	0.554	5.09199e-29	cone hPCs	PIGBOS1
TJP12	2.28128e-33	0.33746	0.291	0.136	5.46756e-29	cone hPCs	TJP1
LOC1070496323	2.40238e-33	0.301461	0.259	0.114	5.75778e-29	cone hPCs	LOC107049632
KIAA11431	2.50067e-33	0.3312	0.351	0.179	5.99337e-29	cone hPCs	KIAA1143
ASNS	4.86239e-33	0.497591	0.287	0.139	1.16537e-28	cone hPCs	ASNS
MCM6	9.8958e-33	0.337308	0.203	0.08	2.37173e-28	cone hPCs	MCM6
SELENOI1	1.04905e-32	0.321822	0.32	0.153	2.51427e-28	cone hPCs	SELENOI
LOC107051702	1.37112e-32	0.264459	0.169	0.06	3.28617e-28	cone hPCs	LOC107051702
HAUS6	1.76757e-32	0.284912	0.187	0.07	4.23634e-28	cone hPCs	HAUS6
TMEM2371	2.2439e-32	0.312322	0.284	0.131	5.37795e-28	cone hPCs	TMEM237
WHSC12	2.82834e-32	0.341367	0.451	0.256	6.77868e-28	cone hPCs	WHSC1
SDC3	3.35848e-32	0.281791	0.236	0.099	8.04927e-28	cone hPCs	SDC3
CCDC153	5.53257e-32	0.308115	0.233	0.099	1.32599e-27	cone hPCs	CCDC15
EPB41L4A	7.97204e-32	0.258603	0.155	0.052	1.91066e-27	cone hPCs	EPB41L4A
PSMC3IP	1.31048e-31	0.269311	0.171	0.062	3.14083e-27	cone hPCs	PSMC3IP
KCTD20	1.37547e-31	0.332383	0.389	0.208	3.29659e-27	cone hPCs	KCTD20
LNPK	1.70712e-31	0.29069	0.233	0.1	4.09146e-27	cone hPCs	LNPK
EZH21	1.77467e-31	0.309896	0.328	0.163	4.25336e-27	cone hPCs	EZH2
PSD1	6.4588e-31	0.299256	0.395	0.212	1.54798e-26	cone hPCs	PSD
CNBP	7.3554e-31	0.308408	0.65	0.433	1.76287e-26	cone hPCs	CNBP
SLK2	8.01711e-31	0.286972	0.331	0.165	1.92146e-26	cone hPCs	SLK
ELOVL6	8.30407e-31	0.320127	0.245	0.109	1.99024e-26	cone hPCs	ELOVL6
KBTBD113	9.1742e-31	0.280902	0.352	0.176	2.19878e-26	cone hPCs	KBTBD11
HAP11	1.13912e-30	0.319917	0.575	0.358	2.73013e-26	cone hPCs	HAP1
MFSD2A	1.78264e-30	0.267061	0.182	0.069	4.27246e-26	cone hPCs	MFSD2A
POLD3	3.144e-30	0.286071	0.274	0.127	7.53524e-26	cone hPCs	POLD3
TOMM201	4.13294e-30	0.289865	0.831	0.657	9.90542e-26	cone hPCs	TOMM20
ATR1	9.14459e-30	0.276568	0.197	0.079	2.19168e-25	cone hPCs	ATR
KIF18B1	9.36784e-30	0.26954	0.182	0.071	2.24519e-25	cone hPCs	KIF18B
CIT2	1.78116e-29	0.303029	0.222	0.095	4.26891e-25	cone hPCs	CIT
CHTF8	1.96156e-29	0.266895	0.166	0.061	4.70126e-25	cone hPCs	CHTF8
FAM49A	2.04559e-29	0.256563	0.187	0.073	4.90266e-25	cone hPCs	FAM49A
GCNA1	2.08558e-29	0.251976	0.182	0.071	4.9985e-25	cone hPCs	GCNA
FANCL1	2.80852e-29	0.266825	0.174	0.067	6.73117e-25	cone hPCs	FANCL
SOD12	3.80969e-29	0.354484	0.501	0.309	9.13068e-25	cone hPCs	SOD1
LRP112	4.66861e-29	0.303553	0.692	0.469	1.11892e-24	cone hPCs	LRP11
E2F22	5.92679e-29	0.265453	0.194	0.079	1.42047e-24	cone hPCs	E2F2
TAGLN32	1.10156e-28	0.324014	0.842	0.687	2.6401e-24	cone hPCs	TAGLN3
DNA21	1.31452e-28	0.261286	0.186	0.074	3.15051e-24	cone hPCs	DNA2
NUF21	1.40867e-28	0.265403	0.175	0.069	3.37617e-24	cone hPCs	NUF2
CSE1L1	1.72834e-28	0.334216	0.32	0.167	4.14232e-24	cone hPCs	CSE1L
CDKN2C3	3.72019e-28	0.329081	0.288	0.142	8.91618e-24	cone hPCs	CDKN2C
RFC11	4.32918e-28	0.349541	0.326	0.171	1.03757e-23	cone hPCs	RFC1
CLTA3	5.9811e-28	0.306935	0.376	0.207	1.43349e-23	cone hPCs	CLTA
HSP90B11	1.1517e-27	0.315161	0.462	0.277	2.76027e-23	cone hPCs	HSP90B1
C22orf39	1.21502e-27	0.317722	0.462	0.277	2.91203e-23	cone hPCs	C22orf39
RAD51	1.9777e-27	0.276885	0.169	0.066	4.73995e-23	cone hPCs	RAD51
CENPI	2.32996e-27	0.255264	0.143	0.052	5.58421e-23	cone hPCs	CENPI
HCRT	2.43221e-27	0.257214	0.197	0.082	5.82927e-23	cone hPCs	HCRT
CYP21A11	2.53954e-27	0.251001	0.145	0.052	6.08652e-23	cone hPCs	CYP21A1
SMS	5.73639e-27	0.302775	0.259	0.126	1.37484e-22	cone hPCs	SMS
MRAS2	7.4431e-27	0.289303	0.382	0.211	1.78389e-22	cone hPCs	MRAS
REEP5	7.71004e-27	0.295569	0.299	0.151	1.84787e-22	cone hPCs	REEP5
RBP14L	8.63161e-27	0.303611	0.351	0.192	2.06874e-22	cone hPCs	RBP14L
NOL9	8.74474e-27	0.312147	0.572	0.384	2.09585e-22	cone hPCs	NOL9
LIMD22	1.09534e-26	0.257063	0.361	0.192	2.62519e-22	cone hPCs	LIMD2
RNF130	1.46849e-26	0.272801	0.222	0.099	3.51954e-22	cone hPCs	RNF130
MCM4	1.91931e-26	0.330625	0.171	0.069	4.60002e-22	cone hPCs	MCM4
SRSF71	2.30813e-26	0.322489	0.628	0.442	5.53189e-22	cone hPCs	SRSF7
C13H5orf24	2.7875e-26	0.266081	0.783	0.582	6.68079e-22	cone hPCs	C13H5orf24
C10H15ORF58	2.95198e-26	0.298128	0.415	0.242	7.07501e-22	cone hPCs	C10H15ORF58
PAICS1	4.29624e-26	0.281109	0.213	0.096	1.02968e-21	cone hPCs	PAICS
ATP5G33	4.41105e-26	0.293176	0.872	0.759	1.0572e-21	cone hPCs	ATP5G3
HNRNPU	4.51097e-26	0.298356	0.755	0.576	1.08114e-21	cone hPCs	HNRNPU
LOC101752260	4.79217e-26	0.307972	0.626	0.436	1.14854e-21	cone hPCs	LOC101752260
GLRX5	5.9084e-26	0.285464	0.505	0.319	1.41607e-21	cone hPCs	GLRX5
LOC1070562701	6.97187e-26	0.31737	0.514	0.328	1.67095e-21	cone hPCs	LOC107056270
MCM5	7.11545e-26	0.304725	0.179	0.075	1.70536e-21	cone hPCs	MCM5
SNRPA1	7.95587e-26	0.31354	0.447	0.272	1.90678e-21	cone hPCs	SNRPA1
NEK62	1.12322e-25	0.256509	0.243	0.114	2.69201e-21	cone hPCs	NEK6
SLC39A6	1.32137e-25	0.267533	0.29	0.147	3.16693e-21	cone hPCs	SLC39A6
EXT1	1.67745e-25	0.26609	0.191	0.082	4.02035e-21	cone hPCs	EXT1
IPO72	1.84661e-25	0.289555	0.61	0.414	4.42578e-21	cone hPCs	IPO7
GKAP13	2.12241e-25	0.275146	0.281	0.141	5.08678e-21	cone hPCs	GKAP1
CCNF2	3.69038e-25	0.274549	0.205	0.092	8.84472e-21	cone hPCs	CCNF
TRIM9	4.28295e-25	0.298076	0.269	0.134	1.0265e-20	cone hPCs	TRIM9
AAAS	4.70225e-25	0.290882	0.301	0.16	1.12699e-20	cone hPCs	AAAS
SUZ12	6.07806e-25	0.253076	0.223	0.103	1.45673e-20	cone hPCs	SUZ12
ECT23	7.92998e-25	0.302561	0.319	0.173	1.90058e-20	cone hPCs	ECT2
DYL12	9.08358e-25	0.251674	0.773	0.576	2.17706e-20	cone hPCs	DYL1
CDCA7	1.66452e-24	0.254918	0.118	0.04	3.98936e-20	cone hPCs	CDCA7
RFC41	2.87428e-24	0.308384	0.341	0.19	6.8888e-20	cone hPCs	RFC4
LOC1070566001	3.37345e-24	0.254418	0.207	0.095	8.08515e-20	cone hPCs	LOC107056600
MTHFD2	4.42025e-24	0.314946	0.297	0.159	1.0594e-19	cone hPCs	MTHFD2
RAN3	5.20175e-24	0.256684	0.633	0.436	1.2467e-19	cone hPCs	RAN
DCTN12	6.28085e-24	0.257021	0.568	0.373	1.50533e-19	cone hPCs	DCTN1
AKIP1	7.69871e-24	0.253509	0.19	0.083	1.84515e-19	cone hPCs	AKIP1
APLP22	1.4093e-23	0.277362	0.404	0.237	3.37767e-19	cone hPCs	APLP2
MAGI11	1.65782e-23	0.304478	0.549	0.361	3.97329e-19	cone hPCs	MAGI1
AHCY	1.85849e-23	0.300506	0.27	0.14	4.45424e-19	cone hPCs	AHCY
NUP85	2.37253e-23	0.278862	0.283	0.15	5.68624e-19	cone hPCs	NUP85
USP5	3.05028e-23	0.291046	0.4	0.236	7.3106e-19	cone hPCs	USP5
DKC1	3.08546e-23	0.275865	0.411	0.246	7.39492e-19	cone hPCs	DKC1
CEBPG	3.52098e-23	0.263274	0.34	0.19	8.43874e-19	cone hPCs	CEBPG
SPOCK31	4.98874e-23	0.304073	0.527	0.351	1.19565e-18	cone hPCs	SPOCK3
MAPKAPK2	5.2235e-23	0.307022	0.419	0.254	1.25192e-18	cone hPCs	MAPKAPK2
IGF2BP3	6.35338e-23	0.250973	0.654	0.467	1.52271e-18	cone hPCs	IGF2BP3
STX2	1.04479e-22	0.252713	0.222	0.106	2.50406e-18	cone hPCs	STX2
ROCK11	1.08556e-22	0.284209	0.303	0.167	2.60176e-18	cone hPCs	ROCK1
ARF6	1.30333e-22	0.252051	0.435	0.267	3.12368e-18	cone hPCs	ARF6
RIF12	2.37506e-22	0.29371	0.199	0.093	5.6923e-18	cone hPCs	RIF1
ZNF217L	3.32223e-22	0.29248	0.235	0.117	7.96239e-18	cone hPCs	ZNF217L
PDE6D	6.37424e-22	0.256851	0.404	0.245	1.52771e-17	cone hPCs	PDE6D
RPA32	6.73244e-22	0.256958	0.32	0.179	1.61356e-17	cone hPCs	RPA3
LOC422214	7.32481e-22	0.261821	0.351	0.201	1.75554e-17	cone hPCs	LOC422214
MRPS12	7.49224e-22	0.270342	0.396	0.239	1.79566e-17	cone hPCs	MRPS12
ASF1A2	7.76395e-22	0.252346	0.256	0.132	1.86079e-17	cone hPCs	ASF1A
PTMS3	8.84877e-22	0.253931	0.776	0.605	2.12079e-17	cone hPCs	PTMS
SNRPD3	1.28778e-21	0.273602	0.685	0.519	3.08643e-17	cone hPCs	SNRPD3
PRDX3	1.39683e-21	0.280408	0.437	0.277	3.34779e-17	cone hPCs	PRDX3
HPF1	1.76173e-21	0.27451	0.307	0.171	4.22234e-17	cone hPCs	HPF1
ARID1B	2.08468e-21	0.262042	0.295	0.16	4.99635e-17	cone hPCs	ARID1B
JPT11	2.09969e-21	0.259516	0.787	0.635	5.03233e-17	cone hPCs	JPT1
CTBPL	2.21329e-21	0.267327	0.39	0.233	5.3046e-17	cone hPCs	CTBPL
GAS2L31	3.25771e-21	0.25892	0.16	0.07	7.80775e-17	cone hPCs	GAS2L3
PA2G41	9.20091e-21	0.299681	0.648	0.482	2.20518e-16	cone hPCs	PA2G4
IFT20	1.05344e-20	0.251105	0.541	0.363	2.52478e-16	cone hPCs	IFT20
ETFA	1.90523e-20	0.26471	0.352	0.207	4.56627e-16	cone hPCs	ETFA
TCP1	2.54576e-20	0.268267	0.498	0.323	6.10143e-16	cone hPCs	TCP1
ALYREF1	2.75552e-20	0.270082	0.64	0.46	6.60416e-16	cone hPCs	ALYREF
ODC11	3.51174e-20	0.287505	0.647	0.487	8.41659e-16	cone hPCs	ODC1
SPECC1L	6.8562e-20	0.252509	0.507	0.339	1.64323e-15	cone hPCs	SPECC1L
TCERG1	8.38607e-20	0.267204	0.519	0.351	2.00989e-15	cone hPCs	TCERG1
MSMO13	9.84461e-20	0.250458	0.402	0.249	2.35946e-15	cone hPCs	MSMO1
MRPL40	2.67121e-19	0.256093	0.511	0.348	6.4021e-15	cone hPCs	MRPL40
SMC3	3.37879e-19	0.250857	0.408	0.257	8.09794e-15	cone hPCs	SMC3
SELENOT	3.94503e-19	0.250414	0.416	0.264	9.45506e-15	cone hPCs	SELENOT
SP3	2.14034e-18	0.261252	0.442	0.287	5.12976e-14	cone hPCs	SP3
SRSF7L3	2.89278e-18	0.260657	0.501	0.342	6.93313e-14	cone hPCs	SRSF7L
LOC107049631	3.22127e-18	0.256995	0.376	0.235	7.72041e-14	cone hPCs	LOC107049631
H2AFY22	3.23838e-18	0.261567	0.329	0.199	7.76143e-14	cone hPCs	H2AFY2
CCAR1	3.67569e-18	0.25222	0.397	0.251	8.80951e-14	cone hPCs	CCAR1
HDAC4	1.02696e-17	0.257152	0.468	0.314	2.46131e-13	cone hPCs	HDAC4
RFC5	2.03235e-17	0.287019	0.357	0.226	4.87093e-13	cone hPCs	RFC5
HSPE11	2.99401e-17	0.264593	0.55	0.398	7.17575e-13	cone hPCs	HSPE1
DGUOK	6.22834e-17	0.257261	0.578	0.429	1.49275e-12	cone hPCs	DGUOK
GARS	1.01785e-14	0.252289	0.331	0.211	2.43948e-10	cone hPCs	GARS
PHGDH3	0.00253466	0.251288	0.457	0.42	1	cone hPCs	PHGDH

## Sheet: HC1
	p_val	avg_logFC	pct.1	pct.2	p_val_adj	cluster	gene
TFAP2A7	0	2.78984	0.851	0.072	0	HCs1	TFAP2A
LHX16	0	2.64021	0.859	0.06	0	HCs1	LHX1
ONECUT25	0	2.48276	0.987	0.377	0	HCs1	ONECUT2
CHGA5	0	2.16888	0.737	0.181	0	HCs1	CHGA
NDRG44	0	2.06716	0.861	0.292	0	HCs1	NDRG4
LOC112530064	0	2.06313	0.653	0.028	0	HCs1	LOC112530064
FGF196	0	2.00714	0.926	0.211	0	HCs1	FGF19
TFAP2B7	0	1.88823	0.634	0.066	0	HCs1	TFAP2B
ONECUT36	0	1.81495	0.875	0.177	0	HCs1	ONECUT3
ONECUT15	0	1.79188	0.927	0.284	0	HCs1	ONECUT1
LSAMP	0	1.68716	0.601	0.051	0	HCs1	LSAMP
SLC4A5	0	1.58703	0.448	0.013	0	HCs1	SLC4A5
BARHL25	0	1.54986	0.611	0.064	0	HCs1	BARHL2
PTF1A7	0	1.54978	0.592	0.061	0	HCs1	PTF1A
OXT	0	1.53599	0.397	0.014	0	HCs1	OXT
SEZ6L6	0	1.5143	0.695	0.117	0	HCs1	SEZ6L
MEGF11	0	1.48081	0.486	0.015	0	HCs1	MEGF11
PRDM137	0	1.46609	0.631	0.088	0	HCs1	PRDM13
PLK21	0	1.39967	0.513	0.055	0	HCs1	PLK2
SHH	0	1.2117	0.424	0.036	0	HCs1	SHH
ZNF703	0	1.16649	0.378	0.017	0	HCs1	ZNF703
GRM4	0	1.13897	0.288	0.008	0	HCs1	GRM4
SCUBE1	0	1.13535	0.361	0.019	0	HCs1	SCUBE1
NGF	0	1.12151	0.364	0.007	0	HCs1	NGF
GRIA4	0	1.11697	0.334	0.018	0	HCs1	GRIA4
NETO1	0	1.00951	0.256	0.002	0	HCs1	NETO1
FGFR2	0	0.870963	0.229	0.005	0	HCs1	FGFR2
CD164L2	3.18804e-296	0.981197	0.305	0.02	7.64077e-292	HCs1	CD164L2
LOC101749691	8.49033e-280	1.00762	0.278	0.017	2.03488e-275	HCs1	LOC101749691
RET	4.24622e-279	0.725556	0.188	0.004	1.01769e-274	HCs1	RET
SLIT17	1.93086e-261	1.19622	0.87	0.255	4.62769e-257	HCs1	SLIT1
OPTC1	8.34654e-256	1.20679	0.397	0.048	2.00042e-251	HCs1	OPTC
MEGF101	2.79047e-254	1.1982	0.448	0.064	6.68792e-250	HCs1	MEGF10
PCBP35	2.02036e-246	1.49712	0.877	0.408	4.84221e-242	HCs1	PCBP3
SELENOP17	1.01453e-236	1.15086	0.457	0.073	2.43152e-232	HCs1	SELENOP1
PLA2G4EL7	4.79055e-227	0.649923	0.152	0.003	1.14815e-222	HCs1	PLA2G4EL7
CPLX27	1.18899e-226	1.22017	0.741	0.219	2.84964e-222	HCs1	CPLX2
PCDH91	3.80198e-225	1.1243	0.408	0.06	9.11222e-221	HCs1	PCDH9
KLC16	1.62113e-215	1.38038	0.747	0.264	3.88536e-211	HCs1	KLC1
SLC25A22	1.74779e-214	0.986542	0.304	0.032	4.18893e-210	HCs1	SLC25A22
MTSS14	1.6913e-208	1.34562	0.65	0.189	4.05353e-204	HCs1	MTSS1
LOC1070526115	5.65492e-206	1.07216	0.449	0.08	1.35531e-201	HCs1	LOC107052611
ATP8B31	2.06566e-200	1.15367	0.377	0.056	4.95077e-196	HCs1	ATP8B3
PLXNC1	3.12359e-199	0.703794	0.185	0.01	7.48631e-195	HCs1	PLXNC1
LOC107053180	8.87003e-197	0.838499	0.241	0.02	2.12588e-192	HCs1	LOC107053180
GAPDH2	3.40812e-190	0.769503	0.998	0.994	8.16825e-186	HCs1	GAPDH
EPB41L26	8.40815e-177	1.12534	0.687	0.241	2.01518e-172	HCs1	EPB41L2
SYT45	6.22444e-171	1.35242	0.484	0.116	1.49181e-166	HCs1	SYT4
EPS8	1.48815e-164	0.892049	0.316	0.048	3.56666e-160	HCs1	EPS8
SPOCK25	4.02055e-164	1.17334	0.587	0.18	9.63605e-160	HCs1	SPOCK2
DYNLL15	1.10313e-160	1.28456	0.519	0.144	2.64387e-156	HCs1	DYNLL1
LIN7A	1.82502e-160	0.749167	0.233	0.024	4.37402e-156	HCs1	LIN7A
SORCS1	6.18594e-151	1.07808	0.29	0.043	1.48259e-146	HCs1	SORCS1
TSHZ21	7.43253e-147	0.924372	0.293	0.045	1.78135e-142	HCs1	TSHZ2
TMSB4Y7	4.90082e-145	0.836978	0.954	0.609	1.17458e-140	HCs1	TMSB4Y
CNKSR2L	2.69377e-144	0.593218	0.144	0.008	6.45615e-140	HCs1	CNKSR2L
C23H1orf216	5.76377e-144	0.813584	0.316	0.054	1.3814e-139	HCs1	C23H1orf216
ESRRG3	6.74527e-143	0.989575	0.459	0.119	1.61664e-138	HCs1	ESRRG
RUNX1T17	6.07661e-132	0.972	0.603	0.208	1.45638e-127	HCs1	RUNX1T1
LMO1	3.33566e-131	0.45401	0.117	0.006	7.99457e-127	HCs1	LMO1
TCERG1L	4.62294e-128	0.460878	0.119	0.006	1.10798e-123	HCs1	TCERG1L
CAV3	6.49229e-128	0.463518	0.119	0.006	1.55601e-123	HCs1	CAV3
YAF25	2.49311e-127	1.0371	0.704	0.346	5.97523e-123	HCs1	YAF2
EEF1A26	2.68945e-125	1.06826	0.495	0.151	6.44581e-121	HCs1	EEF1A2
ZEB22	1.33192e-124	1.10339	0.627	0.268	3.19221e-120	HCs1	ZEB2
TFAP2E	1.3267e-123	0.740198	0.158	0.014	3.17971e-119	HCs1	TFAP2E
LOC112530436	1.49059e-123	0.440083	0.119	0.007	3.57249e-119	HCs1	LOC112530436
LNP1	3.94987e-123	0.566186	0.109	0.005	9.46665e-119	HCs1	LNP1
COX6A16	1.13527e-118	0.675091	0.986	0.939	2.7209e-114	HCs1	COX6A1
PCDH7	2.8891e-117	0.717517	0.248	0.04	6.9243e-113	HCs1	PCDH7
PROX14	2.25079e-110	1.2143	0.505	0.181	5.39447e-106	HCs1	PROX1
FLRT2	4.23914e-108	0.790596	0.218	0.034	1.01599e-103	HCs1	FLRT2
TMSB4X6	5.52905e-108	0.566232	1	0.983	1.32515e-103	HCs1	TMSB4X
PLXNA24	2.56683e-107	0.877162	0.742	0.405	6.15193e-103	HCs1	PLXNA2
CACNG2	4.38047e-107	0.640783	0.215	0.033	1.04987e-102	HCs1	CACNG2
LHFP6	6.47814e-100	0.875297	0.446	0.149	1.55262e-95	HCs1	LHFP
INA	2.7571e-99	0.67495	0.234	0.042	6.60795e-95	HCs1	INA
SALL3	6.02527e-98	0.754068	0.134	0.013	1.44408e-93	HCs1	SALL3
TRIM23	1.03076e-96	0.806486	0.35	0.095	2.47042e-92	HCs1	TRIM2
1946-03-01	3.14321e-95	0.839062	0.478	0.169	7.53334e-91	HCs1	2019-03-04
NRXN14	6.17286e-95	0.866936	0.535	0.212	1.47945e-90	HCs1	NRXN1
NAV14	1.58352e-93	0.868297	0.551	0.234	3.79523e-89	HCs1	NAV1
DAAM14	4.15759e-90	0.783694	0.769	0.462	9.96449e-86	HCs1	DAAM1
RAB6A6	2.2844e-89	0.604014	0.922	0.723	5.47501e-85	HCs1	RAB6A
LOC1125321833	7.96353e-89	0.732447	0.321	0.084	1.90862e-84	HCs1	LOC112532183
SSTR2	2.01405e-88	0.440784	0.108	0.009	4.82707e-84	HCs1	SSTR2
GRIN2A	2.03132e-88	0.708895	0.258	0.056	4.86847e-84	HCs1	GRIN2A
WASF3	6.14898e-82	0.896617	0.377	0.127	1.47373e-77	HCs1	WASF3
ACTB3	2.35995e-81	0.448031	0.986	0.963	5.65608e-77	HCs1	ACTB
STMN26	5.6976e-78	0.616956	0.785	0.408	1.36554e-73	HCs1	STMN2
FAIM25	6.48061e-78	0.684344	0.32	0.09	1.55321e-73	HCs1	FAIM2
NCKAP55	7.77256e-78	0.839431	0.405	0.144	1.86285e-73	HCs1	NCKAP5
SLC32A1	1.0458e-77	0.518408	0.158	0.024	2.50646e-73	HCs1	SLC32A1
LZTS3	3.61781e-76	0.428958	0.111	0.011	8.67081e-72	HCs1	LZTS3
SIX63	6.56135e-76	0.546111	0.964	0.903	1.57256e-71	HCs1	SIX6
TMTC25	5.12159e-74	0.735423	0.337	0.106	1.22749e-69	HCs1	TMTC2
IGSF9B6	8.4895e-74	0.729905	0.494	0.206	2.03468e-69	HCs1	IGSF9B
GMEB27	1.28459e-73	0.571418	0.72	0.375	3.07878e-69	HCs1	GMEB2
CCND16	5.40866e-73	0.968132	0.498	0.231	1.29629e-68	HCs1	CCND1
KLHL92	1.73899e-71	0.817493	0.323	0.102	4.16784e-67	HCs1	KLHL9
MAB21L26	3.0744e-71	0.721889	0.429	0.159	7.36842e-67	HCs1	MAB21L2
RGS124	1.69946e-69	0.690757	0.332	0.107	4.0731e-65	HCs1	RGS12
LOC421356	3.25551e-69	0.425904	0.131	0.018	7.80248e-65	HCs1	LOC421356
FAM110C	4.00069e-69	0.399897	0.106	0.012	9.58847e-65	HCs1	FAM110C
LMO43	7.66965e-69	0.875807	0.403	0.158	1.83818e-64	HCs1	LMO4
BTBD3	1.16573e-68	0.66943	0.226	0.055	2.79392e-64	HCs1	BTBD3
AMN	1.49648e-68	0.496633	0.155	0.026	3.5866e-64	HCs1	AMN
KCNK9	3.94375e-68	0.446933	0.104	0.011	9.45198e-64	HCs1	KCNK9
SCN8A4	1.20431e-67	0.743736	0.405	0.156	2.88636e-63	HCs1	SCN8A
KCTD15	1.8192e-67	0.593074	0.244	0.062	4.36007e-63	HCs1	KCTD15
SYT15	4.25785e-67	0.704506	0.312	0.099	1.02048e-62	HCs1	SYT1
DACT26	4.56966e-67	0.660279	0.358	0.124	1.09521e-62	HCs1	DACT2
NETO22	1.03299e-66	0.695359	0.438	0.183	2.47578e-62	HCs1	NETO2
ATRN1	7.92937e-66	0.80711	0.481	0.229	1.90043e-61	HCs1	ATRN
SOGA33	1.85559e-65	0.744756	0.655	0.398	4.4473e-61	HCs1	SOGA3
SHD4	2.16073e-65	0.725329	0.544	0.278	5.17862e-61	HCs1	SHD
CASZ15	1.89486e-64	0.719964	0.456	0.196	4.54142e-60	HCs1	CASZ1
HTRA16	2.44276e-64	0.752029	0.378	0.146	5.85455e-60	HCs1	HTRA1
FBRSL16	1.22918e-63	0.713004	0.562	0.3	2.94598e-59	HCs1	FBRSL1
BHLHE41	6.12436e-63	0.435848	0.111	0.014	1.46783e-58	HCs1	BHLHE41
GPRIN3	1.15993e-62	0.574126	0.182	0.039	2.78e-58	HCs1	GPRIN3
PPP1R13B	3.82802e-62	0.654358	0.234	0.062	9.17462e-58	HCs1	PPP1R13B
LOC1070527634	5.11547e-62	0.680836	0.75	0.545	1.22603e-57	HCs1	LOC107052763
NRXN36	5.83307e-62	0.744295	0.427	0.172	1.39801e-57	HCs1	NRXN3
PTMA2	3.38512e-61	0.303775	1	0.994	8.11312e-57	HCs1	PTMA
ARF41	5.17108e-61	0.691164	0.631	0.4	1.23935e-56	HCs1	ARF4
LRRC4C	1.23757e-60	0.65689	0.207	0.05	2.96608e-56	HCs1	LRRC4C
NUAK1	1.06357e-59	0.567908	0.201	0.049	2.54906e-55	HCs1	NUAK1
PLXNA16	1.52305e-59	0.607563	0.706	0.447	3.65031e-55	HCs1	PLXNA1
SIK12	1.69954e-59	0.771479	0.316	0.112	4.07328e-55	HCs1	SIK1
FXYD6	2.93607e-59	0.606407	0.225	0.059	7.03687e-55	HCs1	FXYD6
TMEM100	3.19155e-59	0.470669	0.139	0.024	7.64918e-55	HCs1	TMEM100
TANC22	2.29585e-57	0.674427	0.367	0.144	5.50247e-53	HCs1	TANC2
RBFOX27	2.69034e-57	0.683886	0.459	0.217	6.44793e-53	HCs1	RBFOX2
FIGNL23	4.49981e-57	0.650951	0.331	0.122	1.07847e-52	HCs1	FIGNL2
LRRN23	3.59594e-56	0.74628	0.478	0.235	8.61839e-52	HCs1	LRRN2
FEZ14	6.39322e-55	0.679978	0.408	0.179	1.53226e-50	HCs1	FEZ1
GRIA3	5.315e-54	0.53041	0.15	0.03	1.27385e-49	HCs1	GRIA3
LOC1070505952	1.08442e-53	0.755603	0.44	0.211	2.59902e-49	HCs1	LOC107050595
MAB21L3	2.1439e-53	0.474069	0.131	0.024	5.13828e-49	HCs1	MAB21L3
TSHZ1	3.23282e-53	0.489245	0.144	0.028	7.74809e-49	HCs1	TSHZ1
PAX66	8.191e-53	0.479664	0.788	0.501	1.96314e-48	HCs1	PAX6
ATP1B13	1.32165e-52	0.671138	0.291	0.105	3.16759e-48	HCs1	ATP1B1
GPRC5B3	1.42284e-52	0.671951	0.362	0.148	3.41012e-48	HCs1	GPRC5B
TMEM474	2.48036e-52	0.614875	0.259	0.084	5.94468e-48	HCs1	TMEM47
PRNP4	8.15577e-52	0.677656	0.278	0.096	1.95469e-47	HCs1	PRNP
ZNRF25	1.12706e-51	0.602973	0.309	0.114	2.70122e-47	HCs1	ZNRF2
TTYH35	2.13237e-51	0.541883	0.589	0.338	5.11065e-47	HCs1	TTYH3
RNF157	7.07895e-51	0.615191	0.242	0.077	1.69661e-46	HCs1	RNF157
PTCHD1	7.1134e-51	0.516462	0.152	0.033	1.70487e-46	HCs1	PTCHD1
PLCL2	6.36886e-49	0.362665	0.103	0.016	1.52642e-44	HCs1	PLCL2
RAD50	7.05511e-49	0.577942	0.212	0.062	1.6909e-44	HCs1	RAD50
CDK5R17	1.77852e-48	0.525044	0.5	0.241	4.26257e-44	HCs1	CDK5R1
CRMP15	4.69256e-48	0.656693	0.582	0.372	1.12466e-43	HCs1	CRMP1
TNRC6C1	1.82349e-47	0.597141	0.6	0.393	4.37036e-43	HCs1	TNRC6C
LOC112532764	2.36667e-47	0.655321	0.274	0.099	5.6722e-43	HCs1	LOC112532764
PDE4D	7.78188e-47	0.495013	0.206	0.06	1.86508e-42	HCs1	PDE4D
B3GAT1	2.1132e-45	0.517874	0.198	0.057	5.06472e-41	HCs1	B3GAT1
SARS5	2.16866e-45	0.556947	0.693	0.513	5.19763e-41	HCs1	SARS
PDE9A1	1.48747e-44	0.542293	0.187	0.053	3.56502e-40	HCs1	PDE9A
MAPK63	2.4692e-44	0.461464	0.832	0.704	5.91793e-40	HCs1	MAPK6
LOC427783	3.34409e-44	0.526696	0.236	0.079	8.01478e-40	HCs1	LOC427783
SCUBE3	3.20419e-43	0.33838	0.103	0.018	7.67949e-39	HCs1	SCUBE3
LDHA5	1.92699e-42	0.433115	0.883	0.702	4.61842e-38	HCs1	LDHA
SLC35F1	6.02939e-42	0.57848	0.247	0.09	1.44506e-37	HCs1	SLC35F1
PCDH8	2.19054e-41	0.530989	0.168	0.046	5.25006e-37	HCs1	PCDH8
ATP11A7	4.36543e-41	0.471025	0.318	0.131	1.04626e-36	HCs1	ATP11A
ZNF6084	5.16618e-41	0.531646	0.737	0.573	1.23818e-36	HCs1	ZNF608
CLMP5	1.02793e-40	0.596829	0.275	0.108	2.46364e-36	HCs1	CLMP
GRID21	1.19112e-40	0.490208	0.161	0.043	2.85475e-36	HCs1	GRID2
KIAA1211L	1.62258e-40	0.389478	0.13	0.029	3.88883e-36	HCs1	KIAA1211L
CLN62	1.77153e-40	0.581854	0.294	0.122	4.24583e-36	HCs1	CLN6
FAM110A6	2.99202e-40	0.582305	0.37	0.173	7.17098e-36	HCs1	FAM110A
SRXN15	3.57408e-40	0.542597	0.297	0.123	8.566e-36	HCs1	SRXN1
ROBO26	4.7691e-40	0.754321	0.587	0.416	1.14301e-35	HCs1	ROBO2
BTG1L1	5.80589e-40	0.652144	0.424	0.229	1.3915e-35	HCs1	BTG1L
AGPAT2	2.03206e-38	0.418179	0.157	0.043	4.87023e-34	HCs1	AGPAT2
LOC1070490821	5.85612e-38	0.531867	0.217	0.076	1.40354e-33	HCs1	LOC107049082
CELF42	8.14496e-38	0.594005	0.347	0.165	1.9521e-33	HCs1	CELF4
CTBP11	1.07674e-37	0.570121	0.585	0.414	2.58062e-33	HCs1	CTBP1
RAP1GAP2	1.10466e-37	0.445977	0.18	0.055	2.64755e-33	HCs1	RAP1GAP2
PPDPF6	1.72559e-37	0.586431	0.373	0.186	4.13573e-33	HCs1	PPDPF
SH3BGRL	4.60353e-37	0.607244	0.283	0.123	1.10333e-32	HCs1	SH3BGRL
SLCO5A17	7.10175e-37	0.553607	0.35	0.167	1.70208e-32	HCs1	SLCO5A1
PLCL11	1.36393e-36	0.455347	0.165	0.048	3.26894e-32	HCs1	PLCL1
MAN2B21	1.85175e-35	0.461662	0.169	0.052	4.43809e-31	HCs1	MAN2B2
GRIK31	4.56577e-35	0.592867	0.193	0.066	1.09428e-30	HCs1	GRIK3
DNER	9.02384e-35	0.502866	0.19	0.065	2.16274e-30	HCs1	DNER
TOX6	4.66563e-34	0.458539	0.741	0.567	1.11821e-29	HCs1	TOX
ATPIF12	6.3264e-34	0.318759	0.934	0.89	1.51625e-29	HCs1	ATPIF1
FGF131	7.81367e-34	0.4127	0.149	0.043	1.8727e-29	HCs1	FGF13
TNC	1.47055e-33	0.484312	0.122	0.031	3.52448e-29	HCs1	TNC
BRINP17	1.5709e-33	0.524811	0.347	0.169	3.76498e-29	HCs1	BRINP1
DACH2	2.34563e-33	0.476102	0.218	0.083	5.62177e-29	HCs1	DACH2
NR6A12	2.4693e-33	0.581873	0.403	0.225	5.91816e-29	HCs1	NR6A1
NRG11	2.51785e-33	0.380328	0.127	0.033	6.03453e-29	HCs1	NRG1
MSI24	2.94191e-33	0.55024	0.671	0.511	7.05088e-29	HCs1	MSI2
COL6A2	1.26296e-32	0.335516	0.104	0.024	3.02694e-28	HCs1	COL6A2
KIF1A7	1.49613e-32	0.47137	0.511	0.305	3.58577e-28	HCs1	KIF1A
FAM69B1	1.87865e-32	0.382885	0.131	0.036	4.50256e-28	HCs1	FAM69B
LRFN5	2.81577e-32	0.367873	0.117	0.029	6.74857e-28	HCs1	LRFN5
CENPX2	3.92644e-32	0.52122	0.41	0.237	9.41049e-28	HCs1	CENPX
TFAP2C	6.30296e-32	0.363966	0.13	0.035	1.51063e-27	HCs1	TFAP2C
GNG27	7.51292e-32	0.355055	0.497	0.279	1.80062e-27	HCs1	GNG2
ZNF385C1	1.13476e-31	0.518056	0.199	0.074	2.71969e-27	HCs1	ZNF385C
ST8SIA3Z	1.42456e-31	0.34819	0.12	0.031	3.41425e-27	HCs1	ST8SIA3Z
RCAN2	2.87365e-31	0.469444	0.16	0.052	6.88727e-27	HCs1	RCAN2
IER5L6	4.95602e-31	0.526644	0.378	0.205	1.18781e-26	HCs1	IER5L
PGBD5	8.37784e-31	0.410537	0.179	0.061	2.00792e-26	HCs1	PGBD5
DENND4A	2.51724e-30	0.382741	0.125	0.035	6.03308e-26	HCs1	DENND4A
QPCT	2.72266e-30	0.498794	0.203	0.078	6.52541e-26	HCs1	QPCT
RFXAP	3.74404e-30	0.498055	0.217	0.087	8.97335e-26	HCs1	RFXAP
LOC112532177	4.24732e-30	0.341201	0.108	0.027	1.01796e-25	HCs1	LOC112532177
FABP57	1.20329e-29	0.424806	0.391	0.205	2.88393e-25	HCs1	FABP5
CRYBA46	1.57787e-29	0.531527	0.503	0.331	3.78168e-25	HCs1	CRYBA4
MBNL35	2.05237e-29	0.563341	0.377	0.211	4.9189e-25	HCs1	MBNL3
SH3BP53	4.67497e-29	0.512427	0.291	0.142	1.12045e-24	HCs1	SH3BP5
SBK15	3.20441e-28	0.486952	0.318	0.16	7.68001e-24	HCs1	SBK1
ITFG13	4.36147e-28	0.488626	0.312	0.16	1.04531e-23	HCs1	ITFG1
TENM1	3.54962e-27	0.357619	0.128	0.038	8.50737e-23	HCs1	TENM1
ANKS1A	3.7546e-27	0.441284	0.174	0.065	8.99865e-23	HCs1	ANKS1A
ZBTB47	4.53337e-27	0.522314	0.266	0.128	1.08651e-22	HCs1	ZBTB47
MMD	4.86942e-27	0.5385	0.362	0.207	1.16705e-22	HCs1	MMD
RUSC24	8.76977e-27	0.426371	0.207	0.085	2.10185e-22	HCs1	RUSC2
FRMD3	1.17141e-26	0.354666	0.111	0.031	2.80751e-22	HCs1	FRMD3
OSBPL10	1.53713e-26	0.347901	0.106	0.029	3.68405e-22	HCs1	OSBPL10
CALM15	2.37814e-26	0.342468	0.859	0.821	5.69968e-22	HCs1	CALM1
C5H14orf43	2.65005e-26	0.46523	0.595	0.441	6.35138e-22	HCs1	C5H14orf4
TBC1D16	5.67437e-26	0.492619	0.225	0.1	1.35998e-21	HCs1	TBC1D16
RERE2	1.04906e-25	0.495287	0.533	0.397	2.51428e-21	HCs1	RERE
DKK34	4.652e-25	0.514082	0.209	0.09	1.11495e-20	HCs1	DKK3
ARL4C6	5.45342e-25	0.477595	0.508	0.36	1.30702e-20	HCs1	ARL4C
SPRY2	8.68876e-25	0.381072	0.153	0.055	2.08243e-20	HCs1	SPRY2
DUSP232	9.12621e-25	0.448185	0.356	0.207	2.18728e-20	HCs1	DUSP23
RASA3	9.20018e-25	0.405748	0.142	0.05	2.20501e-20	HCs1	RASA3
ATP2B43	4.25303e-24	0.514723	0.506	0.37	1.01932e-19	HCs1	ATP2B4
NDFIP12	5.82612e-24	0.431299	0.576	0.451	1.39635e-19	HCs1	NDFIP1
GRIN2B2	4.97985e-23	0.410023	0.155	0.059	1.19352e-18	HCs1	GRIN2B
1935-09-01	5.7916e-23	0.459891	0.43	0.277	1.38807e-18	HCs1	2019-09-03
MXRA74	6.46222e-23	0.487181	0.297	0.161	1.5488e-18	HCs1	MXRA7
VIM5	9.49007e-23	0.493802	0.484	0.329	2.27448e-18	HCs1	VIM
C3H1ORF198	1.15377e-22	0.409892	0.163	0.065	2.76523e-18	HCs1	C3H1ORF198
RORA1	1.18164e-22	0.48266	0.253	0.127	2.83204e-18	HCs1	RORA
CHD44	7.43217e-22	0.351637	0.753	0.673	1.78127e-17	HCs1	CHD4
SH2B2	2.29413e-21	0.334257	0.106	0.033	5.49835e-17	HCs1	SH2B2
NDEL12	3.26203e-21	0.478329	0.266	0.142	7.81812e-17	HCs1	NDEL1
NDUFA122	1.21468e-20	0.461211	0.43	0.301	2.91122e-16	HCs1	NDUFA12
BACE2	1.4972e-20	0.329863	0.106	0.034	3.58834e-16	HCs1	BACE2
ARHGEF121	2.32896e-20	0.426136	0.195	0.09	5.58183e-16	HCs1	ARHGEF12
PBX13	3.07764e-20	0.420925	0.606	0.514	7.37619e-16	HCs1	PBX1
RAB3IP2	3.2347e-20	0.452044	0.234	0.118	7.75262e-16	HCs1	RAB3IP
LOC1070550131	5.58934e-20	0.438821	0.432	0.296	1.3396e-15	HCs1	LOC107055013
ADAMTSL2L	7.52025e-20	0.338653	0.146	0.057	1.80238e-15	HCs1	ADAMTSL2L
LOC101750610	1.25019e-19	0.323849	0.122	0.044	2.99634e-15	HCs1	LOC101750610
ADD25	2.73937e-19	0.427601	0.339	0.205	6.56544e-15	HCs1	ADD2
LOC1070528373	2.92567e-19	0.36887	0.237	0.121	7.01195e-15	HCs1	LOC107052837
ELMOD23	3.10394e-19	0.436761	0.41	0.283	7.43922e-15	HCs1	ELMOD2
RNF103	3.17688e-19	0.33178	0.138	0.054	7.61403e-15	HCs1	RNF103
HIVEP3	5.65967e-19	0.308836	0.119	0.043	1.35645e-14	HCs1	HIVEP3
SP42	5.80028e-19	0.467867	0.348	0.225	1.39015e-14	HCs1	SP4
CADM26	6.75827e-19	0.418625	0.359	0.227	1.61976e-14	HCs1	CADM2
SIPA1L21	6.85875e-19	0.371428	0.142	0.058	1.64384e-14	HCs1	SIPA1L2
FAM210B1	1.04237e-18	0.400845	0.22	0.111	2.49826e-14	HCs1	FAM210B
TCAIM	1.17049e-18	0.383894	0.166	0.074	2.80531e-14	HCs1	TCAIM
HLF	1.29955e-18	0.386341	0.209	0.103	3.11462e-14	HCs1	HLF
C1H11ORF87	1.30224e-18	0.37664	0.123	0.046	3.12108e-14	HCs1	C1H11ORF87
GABRG2	1.45118e-18	0.311593	0.142	0.057	3.47805e-14	HCs1	GABRG2
PXYLP17	1.58978e-18	0.444441	0.278	0.159	3.81022e-14	HCs1	PXYLP1
NCS15	1.94954e-18	0.451132	0.381	0.258	4.67247e-14	HCs1	NCS1
GRK4	2.27465e-18	0.431773	0.225	0.117	5.45166e-14	HCs1	GRK4
ADK1	5.10809e-18	0.402471	0.182	0.086	1.22426e-13	HCs1	ADK
DYM	6.2971e-18	0.330065	0.123	0.047	1.50923e-13	HCs1	DYM
RASSF24	1.63902e-17	0.46483	0.315	0.195	3.92824e-13	HCs1	RASSF2
TBL1XR11	4.85634e-17	0.421511	0.551	0.453	1.16392e-12	HCs1	TBL1XR1
MDGA2	6.11092e-17	0.326442	0.12	0.046	1.46461e-12	HCs1	MDGA2
CLCN43	6.43864e-17	0.368279	0.187	0.09	1.54315e-12	HCs1	CLCN4
ZNF385A1	6.66772e-17	0.384456	0.244	0.134	1.59805e-12	HCs1	ZNF385A
LOC107053525	9.27604e-17	0.301119	0.122	0.047	2.22319e-12	HCs1	LOC107053525
ARL4A6	1.00764e-16	0.414181	0.335	0.217	2.41501e-12	HCs1	ARL4A
TLX2	1.29848e-16	0.332207	0.139	0.059	3.11208e-12	HCs1	TLX2
LSM14B	1.30058e-16	0.387061	0.361	0.239	3.11709e-12	HCs1	LSM14B
CEP85L1	3.02534e-16	0.380927	0.237	0.132	7.25083e-12	HCs1	CEP85L
MAFB	3.08249e-16	0.315011	0.128	0.052	7.38779e-12	HCs1	MAFB
ELMO14	4.01734e-16	0.386131	0.241	0.134	9.62837e-12	HCs1	ELMO1
ANKRD44	4.08189e-16	0.373434	0.172	0.083	9.78307e-12	HCs1	ANKRD44
NCOR1	5.27349e-16	0.4188	0.29	0.18	1.2639e-11	HCs1	NCOR1
LOC1017492231	5.84888e-16	0.322748	0.123	0.05	1.4018e-11	HCs1	LOC101749223
CAMK2N11	5.94471e-16	0.342186	0.153	0.07	1.42477e-11	HCs1	CAMK2N1
PCDHGC35	7.94533e-16	0.378276	0.356	0.238	1.90426e-11	HCs1	PCDHGC3
DNMT3A5	1.10313e-15	0.35034	0.625	0.529	2.64386e-11	HCs1	DNMT3A
PDE3A1	1.15807e-15	0.398793	0.146	0.065	2.77554e-11	HCs1	PDE3A
SAMD113	1.23906e-15	0.360519	0.228	0.124	2.96965e-11	HCs1	SAMD11
ANK24	2.05623e-15	0.450242	0.304	0.194	4.92818e-11	HCs1	ANK2
DIS3L	2.64585e-15	0.280755	0.103	0.039	6.34132e-11	HCs1	DIS3L
MIB2	4.68484e-15	0.287886	0.101	0.038	1.12282e-10	HCs1	MIB2
FRMD5	6.80321e-15	0.328269	0.136	0.06	1.63053e-10	HCs1	FRMD5
PNISR1	7.01282e-15	0.353012	0.546	0.451	1.68076e-10	HCs1	PNISR
MVB12B	1.05618e-14	0.344868	0.188	0.099	2.53134e-10	HCs1	MVB12B
RPRD1A1	1.52274e-14	0.393658	0.25	0.149	3.64954e-10	HCs1	RPRD1A
MSRA	2.83597e-14	0.270793	0.106	0.042	6.79698e-10	HCs1	MSRA
ADSL1	3.01758e-14	0.386952	0.299	0.194	7.23224e-10	HCs1	ADSL
CENPV	3.04894e-14	0.36193	0.193	0.104	7.30738e-10	HCs1	CENPV
CDK5RAP2	3.58946e-14	0.366789	0.236	0.139	8.60287e-10	HCs1	CDK5RAP2
MYO18B	3.84763e-14	0.344697	0.142	0.067	9.2216e-10	HCs1	MYO18B
PGAM11	4.0253e-14	0.269646	0.829	0.798	9.64744e-10	HCs1	PGAM1
AZIN13	4.17999e-14	0.390547	0.516	0.426	1.00182e-09	HCs1	AZIN1
ASCC1	4.97662e-14	0.414793	0.245	0.15	1.19275e-09	HCs1	ASCC1
ARHGEF1	4.99176e-14	0.376022	0.149	0.072	1.19638e-09	HCs1	ARHGEF1
MGAT4A3	7.16375e-14	0.341127	0.19	0.1	1.71694e-09	HCs1	MGAT4A
TRAK11	9.09215e-14	0.294175	0.125	0.056	2.17911e-09	HCs1	TRAK1
FGF121	9.88292e-14	0.371034	0.278	0.179	2.36864e-09	HCs1	FGF12
HIC24	1.5732e-13	0.358198	0.487	0.392	3.77048e-09	HCs1	HIC2
KTN11	1.96854e-13	0.360216	0.185	0.101	4.71801e-09	HCs1	KTN1
KIAA04082	2.37934e-13	0.379116	0.247	0.15	5.70255e-09	HCs1	KIAA0408
ATP11B3	2.73328e-13	0.346271	0.29	0.185	6.55085e-09	HCs1	ATP11B
ATP2B12	3.07661e-13	0.39495	0.321	0.221	7.3737e-09	HCs1	ATP2B1
MYO9A	3.66883e-13	0.362759	0.201	0.113	8.79309e-09	HCs1	MYO9A
SNRK3	3.92763e-13	0.336723	0.285	0.181	9.41336e-09	HCs1	SNRK
TMEM9B2	4.31694e-13	0.34152	0.465	0.37	1.03464e-08	HCs1	TMEM9B
NXN1	4.7578e-13	0.303991	0.165	0.084	1.1403e-08	HCs1	NXN
EPS15	8.90409e-13	0.31978	0.128	0.06	2.13404e-08	HCs1	EPS15
ATP6V0E22	1.386e-12	0.254372	0.631	0.558	3.32182e-08	HCs1	ATP6V0E2
RACGAP1L2	1.61869e-12	0.310294	0.134	0.064	3.87951e-08	HCs1	RACGAP1L
BICD21	2.59994e-12	0.324693	0.226	0.135	6.23127e-08	HCs1	BICD2
TMTC4	2.65601e-12	0.351201	0.15	0.077	6.36566e-08	HCs1	TMTC4
CDCA7L4	3.58911e-12	0.431595	0.296	0.207	8.60201e-08	HCs1	CDCA7L
C25H1ORF43	3.97827e-12	0.366993	0.25	0.159	9.53472e-08	HCs1	C25H1ORF43
RPL22L12	5.62447e-12	0.257335	0.728	0.686	1.34802e-07	HCs1	RPL22L1
NT5C2	5.93302e-12	0.290229	0.136	0.067	1.42197e-07	HCs1	NT5C2
RBM52	6.2137e-12	0.34013	0.462	0.375	1.48924e-07	HCs1	RBM5
C5H14orf375	6.33885e-12	0.321326	0.234	0.142	1.51923e-07	HCs1	C5H14orf37
SHC1	7.21408e-12	0.336331	0.152	0.079	1.729e-07	HCs1	SHC1
PSMG41	7.80569e-12	0.338285	0.402	0.312	1.87079e-07	HCs1	PSMG4
TAB3	9.05825e-12	0.374023	0.351	0.264	2.17099e-07	HCs1	TAB3
HTT	9.35936e-12	0.305319	0.198	0.114	2.24316e-07	HCs1	HTT
NFIL31	9.36052e-12	0.333662	0.258	0.167	2.24344e-07	HCs1	NFIL3
SAT15	1.02362e-11	0.362304	0.332	0.233	2.45331e-07	HCs1	SAT1
LOC1125315202	1.05236e-11	0.287764	0.119	0.055	2.5222e-07	HCs1	LOC112531520
MYT1L7	1.53476e-11	0.266548	0.187	0.104	3.67837e-07	HCs1	MYT1L
RAB303	1.57752e-11	0.322052	0.239	0.149	3.78084e-07	HCs1	RAB30
GPR851	1.79052e-11	0.341228	0.301	0.208	4.29134e-07	HCs1	GPR85
GCSH2	2.00152e-11	0.360341	0.37	0.281	4.79705e-07	HCs1	GCSH
PDE7A2	2.01381e-11	0.353129	0.388	0.295	4.8265e-07	HCs1	PDE7A
CAPN10	2.89058e-11	0.326856	0.201	0.12	6.92785e-07	HCs1	CAPN10
PSMB2	2.98475e-11	0.377701	0.413	0.333	7.15355e-07	HCs1	PSMB2
TPM3	4.21821e-11	0.401304	0.326	0.245	1.01098e-06	HCs1	TPM3
TSC22D14	4.22181e-11	0.283982	0.729	0.687	1.01184e-06	HCs1	TSC22D1
ANP32A2	4.39206e-11	0.314898	0.44	0.349	1.05264e-06	HCs1	ANP32A
BRPF3	4.71588e-11	0.336603	0.196	0.117	1.13025e-06	HCs1	BRPF3
GINS3	5.36819e-11	0.30477	0.142	0.075	1.28659e-06	HCs1	GINS3
FAM3C	6.80418e-11	0.256451	0.108	0.05	1.63076e-06	HCs1	FAM3C
TUBB2A6	9.84898e-11	0.286633	0.31	0.217	2.3605e-06	HCs1	TUBB2A
BRD31	1.01877e-10	0.303572	0.443	0.36	2.44168e-06	HCs1	BRD3
CHEK11	1.06619e-10	0.358208	0.218	0.136	2.55533e-06	HCs1	CHEK1
MSANTD4	1.18193e-10	0.353339	0.242	0.158	2.83273e-06	HCs1	MSANTD4
DDX17	1.32996e-10	0.301556	0.562	0.506	3.18752e-06	HCs1	DDX17
GTF3C6	1.56578e-10	0.294561	0.142	0.076	3.75271e-06	HCs1	GTF3C6
KCTD1	1.70299e-10	0.280487	0.103	0.047	4.08156e-06	HCs1	KCTD1
RARRES2	5.46618e-10	0.293803	0.149	0.082	1.31008e-05	HCs1	RARRES2
RUFY35	5.77815e-10	0.302985	0.354	0.269	1.38485e-05	HCs1	RUFY3
CHD53	5.98786e-10	0.326265	0.304	0.216	1.43511e-05	HCs1	CHD5
NOP21	6.04749e-10	0.303688	0.478	0.408	1.4494e-05	HCs1	NOP2
CCDC1774	6.20155e-10	0.274266	0.161	0.091	1.48632e-05	HCs1	CCDC177
PTPN21	7.29417e-10	0.273712	0.136	0.073	1.74819e-05	HCs1	PTPN21
ARID3B	8.64159e-10	0.333296	0.288	0.207	2.07113e-05	HCs1	ARID3B
PTPRO4	1.3009e-09	0.326332	0.263	0.179	3.11787e-05	HCs1	PTPRO
TMEM1215	1.39814e-09	0.282106	0.176	0.103	3.35091e-05	HCs1	TMEM121
SCG55	1.63671e-09	0.295082	0.222	0.143	3.9227e-05	HCs1	SCG5
TNRC184	1.85826e-09	0.268656	0.5	0.432	4.45368e-05	HCs1	TNRC18
ATP6AP2	2.08582e-09	0.322295	0.297	0.217	4.99909e-05	HCs1	ATP6AP2
KIF21B5	2.2826e-09	0.283959	0.236	0.155	5.47071e-05	HCs1	KIF21B
ATP6V1G1	3.0684e-09	0.27092	0.538	0.494	7.35403e-05	HCs1	ATP6V1G1
DYNC1H14	3.14352e-09	0.26844	0.576	0.526	7.53407e-05	HCs1	DYNC1H1
DLGAP41	3.40052e-09	0.358926	0.258	0.183	8.15002e-05	HCs1	DLGAP4
RGS36	4.47086e-09	0.413029	0.38	0.308	0.000107153	HCs1	RGS3
CTBP24	6.52957e-09	0.28557	0.373	0.291	0.000156494	HCs1	CTBP2
PHACTR32	6.9284e-09	0.270524	0.171	0.104	0.000166053	HCs1	PHACTR3
TRIO1	7.42988e-09	0.295672	0.285	0.203	0.000178072	HCs1	TRIO
FCRL4	7.47595e-09	0.288981	0.149	0.086	0.000179176	HCs1	FCRL4
CBX12	8.20016e-09	0.314593	0.464	0.402	0.000196533	HCs1	CBX1
LOC1125328902	9.05483e-09	0.284322	0.347	0.271	0.000217017	HCs1	LOC112532890
GREB1	1.06181e-08	0.275815	0.104	0.053	0.000254485	HCs1	GREB1
FERMT23	1.39752e-08	0.295214	0.43	0.354	0.000334945	HCs1	FERMT2
NR2F2	1.84463e-08	0.329361	0.234	0.162	0.000442103	HCs1	NR2F2
TMX3	1.92526e-08	0.307138	0.214	0.142	0.000461427	HCs1	TMX3
STXBP4	2.3612e-08	0.265765	0.179	0.112	0.000565908	HCs1	STXBP4
PPM1E3	2.45401e-08	0.317067	0.214	0.143	0.000588152	HCs1	PPM1E
PUM2	2.53229e-08	0.275582	0.456	0.386	0.000606914	HCs1	PUM2
MLLT1	3.01197e-08	0.31726	0.259	0.189	0.000721879	HCs1	MLLT1
AGO4	4.09937e-08	0.301909	0.215	0.146	0.000982496	HCs1	AGO4
SELENOM	4.63705e-08	0.27805	0.195	0.127	0.00111136	HCs1	SELENOM
FYN2	5.30765e-08	0.330099	0.28	0.209	0.00127208	HCs1	FYN
SCMH1	6.03364e-08	0.277765	0.149	0.089	0.00144608	HCs1	SCMH1
PALM5	6.28862e-08	0.287049	0.299	0.224	0.00150719	HCs1	PALM
LOC4228946	7.09327e-08	0.286103	0.241	0.169	0.00170004	HCs1	LOC422894
PLPPR33	7.74102e-08	0.260644	0.234	0.161	0.00185529	HCs1	PLPPR3
SRSF41	8.28489e-08	0.276151	0.29	0.218	0.00198564	HCs1	SRSF4
TLE33	8.94454e-08	0.274695	0.411	0.343	0.00214374	HCs1	TLE3
NRG36	1.28348e-07	0.271768	0.214	0.145	0.0030761	HCs1	NRG3
RAB11FIP2	1.48057e-07	0.270149	0.157	0.098	0.00354848	HCs1	RAB11FIP2
RUNDC3A	1.67859e-07	0.255451	0.16	0.1	0.00402307	HCs1	RUNDC3A
RAB11B2	1.80766e-07	0.251123	0.334	0.264	0.00433243	HCs1	RAB11B
PPM1A1	1.83111e-07	0.296356	0.348	0.281	0.00438862	HCs1	PPM1A
ORAOV1	2.12323e-07	0.300794	0.296	0.23	0.00508875	HCs1	ORAOV1
GNAI11	2.28438e-07	0.275188	0.19	0.127	0.00547498	HCs1	GNAI1
MMP171	2.30623e-07	0.308402	0.133	0.079	0.00552733	HCs1	MMP17
AKAP62	2.66405e-07	0.2977	0.104	0.057	0.00638494	HCs1	AKAP6
NOVA14	3.32556e-07	0.269699	0.38	0.313	0.00797037	HCs1	NOVA1
ZCRB11	3.51453e-07	0.337181	0.329	0.275	0.00842327	HCs1	ZCRB1
ADGRL24	3.66267e-07	0.266558	0.153	0.096	0.00877831	HCs1	ADGRL2
GNAQ	4.7222e-07	0.269558	0.182	0.121	0.0113177	HCs1	GNAQ
APP3	5.37246e-07	0.252882	0.502	0.455	0.0128762	HCs1	APP
HIF1A	6.22008e-07	0.286246	0.337	0.28	0.0149077	HCs1	HIF1A
APC3	6.40937e-07	0.274354	0.291	0.224	0.0153613	HCs1	APC
BIN11	6.53959e-07	0.300039	0.198	0.137	0.0156734	HCs1	BIN1
C4H20ORF1943	6.64152e-07	0.277246	0.369	0.302	0.0159177	HCs1	C4H20ORF194
GNAS	8.27238e-07	0.280292	0.44	0.39	0.0198264	HCs1	GNAS
HMGN56	8.45528e-07	0.289728	0.752	0.754	0.0202648	HCs1	HMGN5
CHD6	9.24628e-07	0.27185	0.29	0.226	0.0221606	HCs1	CHD6
NT5DC2	1.00634e-06	0.307215	0.236	0.175	0.024119	HCs1	NT5DC2
FAM89A1	1.16395e-06	0.310308	0.301	0.241	0.0278964	HCs1	FAM89A
HDAC7	1.59351e-06	0.260212	0.141	0.088	0.0381915	HCs1	HDAC7
NASP6	1.70558e-06	0.32705	0.464	0.417	0.0408777	HCs1	NASP
CDC42EP4	2.01788e-06	0.32523	0.248	0.189	0.0483625	HCs1	CDC42EP4
WASL	2.06044e-06	0.288738	0.356	0.301	0.0493825	HCs1	WASL
SMURF1	2.06397e-06	0.267776	0.13	0.08	0.0494671	HCs1	SMURF1
DYNC1LI1	2.32756e-06	0.288666	0.329	0.273	0.0557846	HCs1	DYNC1LI1
SSBP41	2.3733e-06	0.25102	0.206	0.146	0.0568808	HCs1	SSBP4
SMAD77	3.26998e-06	0.368923	0.255	0.196	0.0783716	HCs1	SMAD7
COG6	4.67149e-06	0.270371	0.207	0.151	0.111962	HCs1	COG6
UBE2E21	5.19285e-06	0.250061	0.207	0.15	0.124457	HCs1	UBE2E2
SLC30A4	5.2534e-06	0.25974	0.226	0.169	0.125908	HCs1	SLC30A4
AAR2	5.63653e-06	0.250049	0.149	0.099	0.135091	HCs1	AAR2
FAM171B2	7.55628e-06	0.277293	0.372	0.326	0.181101	HCs1	FAM171B
ARPC1A1	7.76869e-06	0.260246	0.332	0.281	0.186192	HCs1	ARPC1A
NCOA11	7.95428e-06	0.327222	0.236	0.179	0.19064	HCs1	NCOA1
LOC107053182	1.05063e-05	0.257799	0.274	0.22	0.251805	HCs1	LOC107053182
CPEB3	1.12382e-05	0.254457	0.125	0.079	0.269346	HCs1	CPEB3
CELF65	1.21804e-05	0.258369	0.274	0.216	0.291928	HCs1	CELF6
HDGFRP33	1.5415e-05	0.257612	0.321	0.269	0.369451	HCs1	HDGFRP3
HCFC2	1.71454e-05	0.275015	0.172	0.122	0.410924	HCs1	HCFC2
ZNF644	1.9953e-05	0.268516	0.481	0.455	0.478214	HCs1	ZNF644
NLRP1L	2.07957e-05	0.25188	0.239	0.186	0.49841	HCs1	NLRP1L
OGT	2.95148e-05	0.279477	0.304	0.254	0.707381	HCs1	OGT
SAMD4A1	3.87275e-05	0.265175	0.169	0.122	0.928181	HCs1	SAMD4A
TCF201	8.1108e-05	0.255406	0.329	0.286	1	HCs1	TCF20
INSR	9.32855e-05	0.253797	0.282	0.235	1	HCs1	INSR
BCL11A1	0.000136363	0.259353	0.297	0.252	1	HCs1	BCL11A
SYNGR14	0.000171044	0.252073	0.258	0.212	1	HCs1	SYNGR1

## Sheet: HC2
	p_val	avg_logFC	pct.1	pct.2	p_val_adj	cluster	gene
TFAP2B8	0	2.05675	0.761	0.058	0	HCs2	TFAP2B
PRDM138	0	1.6389	0.744	0.081	0	HCs2	PRDM13
NRXN37	0	1.63058	0.763	0.15	0	HCs2	NRXN3
ZFHX35	0	1.62537	0.74	0.105	0	HCs2	ZFHX3
TFAP2A8	0	1.58004	0.783	0.077	0	HCs2	TFAP2A
NRP1	0	1.53353	0.551	0.022	0	HCs2	NRP1
ZFHX48	0	1.39021	0.65	0.122	0	HCs2	ZFHX4
FAIM26	0	1.18022	0.54	0.075	0	HCs2	FAIM2
TFAP2C1	0	1.1585	0.432	0.015	0	HCs2	TFAP2C
FXYD61	0	1.1345	0.438	0.044	0	HCs2	FXYD6
GABRG21	0	1.10292	0.446	0.036	0	HCs2	GABRG2
SOX3	0	0.963766	0.271	0.008	0	HCs2	SOX3
SLC32A11	0	0.95645	0.323	0.012	0	HCs2	SLC32A1
TMEM200B	0	0.78448	0.26	0.011	0	HCs2	TMEM200B
RUNX1T18	1.0918e-286	1.3291	0.78	0.196	2.61671e-282	HCs2	RUNX1T1
MAFB1	5.03963e-269	1.27336	0.363	0.036	1.20785e-264	HCs2	MAFB
LOC1070531801	4.69383e-261	0.819528	0.275	0.018	1.12497e-256	HCs2	LOC107053180
FABP58	9.85018e-252	1.24594	0.725	0.183	2.36079e-247	HCs2	FABP5
LDHA6	2.56779e-221	1.28978	0.986	0.695	6.15422e-217	HCs2	LDHA
EPB41L27	1.27146e-210	1.34321	0.721	0.239	3.0473e-206	HCs2	EPB41L2
TMSB4Y8	5.01608e-209	1.05803	0.975	0.607	1.2022e-204	HCs2	TMSB4Y
CABP1	5.39628e-208	1.01752	0.384	0.054	1.29333e-203	HCs2	CABP1
PAX67	8.22444e-204	1.1159	0.939	0.491	1.97115e-199	HCs2	PAX6
KCTD151	1.30243e-200	0.9247	0.373	0.054	3.12154e-196	HCs2	KCTD15
SLIT18	4.82747e-192	0.906297	0.817	0.259	1.157e-187	HCs2	SLIT1
PLXNA25	5.1014e-184	1.16094	0.852	0.397	1.22265e-179	HCs2	PLXNA2
FRMD31	3.83955e-178	0.664645	0.239	0.022	9.20226e-174	HCs2	FRMD3
TMCC3	2.09916e-170	0.722349	0.221	0.02	5.03105e-166	HCs2	TMCC3
SPOCK26	4.92499e-167	1.02013	0.613	0.178	1.18037e-162	HCs2	SPOCK2
LOC1070535251	1.05713e-166	0.714576	0.288	0.036	2.53362e-162	HCs2	LOC107053525
CPLX1	8.18429e-154	0.607815	0.111	0.003	1.96153e-149	HCs2	CPLX1
CLMP6	1.45575e-147	0.839267	0.433	0.098	3.48901e-143	HCs2	CLMP
FAM110A7	6.75981e-145	1.12646	0.545	0.162	1.62012e-140	HCs2	FAM110A
TMSB4X7	6.03031e-144	0.702078	1	0.983	1.44528e-139	HCs2	TMSB4X
YAF26	2.00884e-139	0.995442	0.74	0.344	4.81459e-135	HCs2	YAF2
GMEB28	4.03021e-139	0.775671	0.85	0.366	9.65921e-135	HCs2	GMEB2
ST184	1.2603e-132	0.853037	0.455	0.117	3.02055e-128	HCs2	ST18
CHRNB3	1.24066e-130	0.561187	0.159	0.013	2.97349e-126	HCs2	CHRNB3
LOC1017496911	8.27095e-122	0.521841	0.197	0.022	1.9823e-117	HCs2	LOC101749691
GAPDH3	2.97624e-121	0.545315	1	0.994	7.13316e-117	HCs2	GAPDH
SLCO5A18	1.5048e-119	0.838531	0.508	0.156	3.60655e-115	HCs2	SLCO5A1
AZIN14	8.57153e-119	0.959991	0.763	0.409	2.05434e-114	HCs2	AZIN1
CHGB7	2.00515e-118	1.29913	0.637	0.265	4.80575e-114	HCs2	CHGB
RASGEF1C	7.10765e-118	0.574507	0.215	0.029	1.70349e-113	HCs2	RASGEF1C
PLK22	3.78972e-117	0.776818	0.331	0.068	9.08283e-113	HCs2	PLK2
FGF197	2.61216e-113	0.84921	0.631	0.231	6.26056e-109	HCs2	FGF19
DKK35	4.73408e-113	0.712831	0.352	0.081	1.13462e-108	HCs2	DKK3
PLPPR4	5.61698e-113	0.574598	0.22	0.031	1.34622e-108	HCs2	PLPPR4
TFAP2E1	3.46923e-112	0.580641	0.153	0.014	8.3147e-108	HCs2	TFAP2E
PTMA3	1.43644e-108	0.395068	1	0.994	3.44271e-104	HCs2	PTMA
ZNRF26	1.1845e-106	0.832874	0.396	0.109	2.8389e-102	HCs2	ZNRF2
MROH2B1	6.65329e-103	0.38793	0.108	0.007	1.59459e-98	HCs2	MROH2B1
LOC1070526116	1.51106e-101	0.723979	0.354	0.087	3.62156e-97	HCs2	LOC107052611
GRIA31	8.72389e-100	0.578593	0.194	0.028	2.09085e-95	HCs2	GRIA3
CDK5R18	2.74401e-99	0.756398	0.611	0.234	6.57658e-95	HCs2	CDK5R1
KIF13B	8.0639e-99	0.479053	0.197	0.029	1.93267e-94	HCs2	KIF13B
GCSH3	1.93038e-95	0.785217	0.602	0.265	4.62653e-91	HCs2	GCSH
SRXN16	6.92353e-94	0.750877	0.395	0.117	1.65936e-89	HCs2	SRXN1
SHH1	1.50131e-92	0.625905	0.248	0.048	3.59818e-88	HCs2	SHH
SHD5	6.5337e-92	0.792949	0.611	0.274	1.56593e-87	HCs2	SHD
UBE2E22	1.01163e-90	0.733219	0.42	0.136	2.42456e-86	HCs2	UBE2E2
LOC1125321834	1.45441e-90	0.605441	0.333	0.084	3.48579e-86	HCs2	LOC112532183
TTYH36	6.92105e-87	0.681597	0.686	0.332	1.65877e-82	HCs2	TTYH3
LHFP7	3.27718e-86	0.712218	0.436	0.149	7.85441e-82	HCs2	LHFP
CRYBA47	1.32167e-85	0.687771	0.685	0.319	3.16765e-81	HCs2	CRYBA4
FAM210B2	1.5502e-85	0.676804	0.357	0.102	3.71536e-81	HCs2	FAM210B
PCBP36	2.20333e-84	0.723349	0.758	0.416	5.28072e-80	HCs2	PCBP3
SEZ6L7	2.51333e-84	0.694798	0.424	0.135	6.02371e-80	HCs2	SEZ6L
EPHB6	6.68352e-84	0.579196	0.221	0.042	1.60184e-79	HCs2	EPHB6
ISL11	8.51013e-83	1.2261	0.236	0.05	2.03962e-78	HCs2	ISL1
CA28	2.44246e-82	0.704003	0.594	0.249	5.85384e-78	HCs2	CA2
MGAT4A4	1.0683e-81	0.662398	0.33	0.091	2.5604e-77	HCs2	MGAT4A
CD82	9.85388e-81	0.414764	0.118	0.012	2.36168e-76	HCs2	CD82
NAV15	1.17445e-79	0.710963	0.549	0.235	2.81481e-75	HCs2	NAV1
RBFOX1	8.54445e-79	0.421687	0.142	0.018	2.04785e-74	HCs2	RBFOX1
FBRSL17	1.67055e-78	0.732657	0.615	0.297	4.00381e-74	HCs2	FBRSL1
CADM27	1.73702e-77	0.702086	0.514	0.216	4.16312e-73	HCs2	CADM2
AGAP13	1.9556e-77	0.721379	0.685	0.366	4.68699e-73	HCs2	AGAP1
PLXNA17	2.76653e-77	0.634664	0.761	0.444	6.63055e-73	HCs2	PLXNA1
RND35	6.3409e-77	0.608773	0.323	0.092	1.51972e-72	HCs2	RND3
CTBP25	1.63687e-76	0.696989	0.594	0.276	3.92308e-72	HCs2	CTBP2
KCNC1	6.43115e-75	0.542898	0.204	0.04	1.54135e-70	HCs2	KCNC1
STMN32	1.03868e-74	0.572446	0.285	0.074	2.4894e-70	HCs2	STMN3
CACNG21	1.66861e-74	0.45686	0.189	0.034	3.99916e-70	HCs2	CACNG2
SELENOP18	9.12158e-74	0.608714	0.303	0.083	2.18617e-69	HCs2	SELENOP1
NRIP3	2.77986e-73	0.362219	0.126	0.015	6.66249e-69	HCs2	NRIP3
FAT4	2.48391e-71	0.352888	0.121	0.015	5.95318e-67	HCs2	FAT4
LOC107053955	4.75087e-71	0.338404	0.111	0.012	1.13864e-66	HCs2	LOC107053955
PMEPA11	5.02835e-69	0.690273	0.424	0.163	1.20515e-64	HCs2	PMEPA1
INA1	1.20597e-68	0.509941	0.205	0.044	2.89034e-64	HCs2	INA
LRRC4C1	1.33311e-68	0.561272	0.22	0.05	3.19507e-64	HCs2	LRRC4C
TRIM24	5.88816e-67	0.53339	0.32	0.097	1.41122e-62	HCs2	TRIM2
KIF21B6	6.7814e-67	0.612979	0.398	0.144	1.6253e-62	HCs2	KIF21B
FAM124A	1.17686e-66	0.456972	0.135	0.02	2.82058e-62	HCs2	FAM124A
BARHL26	2.88655e-66	0.501598	0.299	0.085	6.9182e-62	HCs2	BARHL2
KCNS1	1.2044e-64	0.394411	0.132	0.02	2.8866e-60	HCs2	KCNS1
PDE4D1	1.27092e-64	0.614987	0.232	0.058	3.04601e-60	HCs2	PDE4D
GPRC5B4	1.04512e-63	0.628954	0.398	0.146	2.50484e-59	HCs2	GPRC5B
COX6A17	1.58083e-62	0.440767	0.978	0.939	3.78878e-58	HCs2	COX6A1
CCND17	2.16267e-62	0.832235	0.5	0.231	5.18327e-58	HCs2	CCND1
ZNF488	2.34646e-62	0.592045	0.223	0.056	5.62375e-58	HCs2	ZNF488
TOX7	8.12152e-62	0.635982	0.814	0.563	1.94648e-57	HCs2	TOX
CALB2	4.34034e-61	0.515501	0.11	0.014	1.04025e-56	HCs2	CALB2
GRIN2A1	1.20657e-60	0.653794	0.226	0.058	2.89179e-56	HCs2	GRIN2A
ARHGEF122	3.10376e-59	0.536279	0.279	0.084	7.43879e-55	HCs2	ARHGEF12
KLC17	5.43854e-59	0.621062	0.557	0.277	1.30345e-54	HCs2	KLC1
TMEM1001	4.58376e-57	0.405972	0.139	0.024	1.09859e-52	HCs2	TMEM100
LOC1070539201	7.58352e-57	0.558353	0.293	0.094	1.81754e-52	HCs2	LOC107053920
B3GAT11	4.63319e-56	0.465887	0.217	0.056	1.11044e-51	HCs2	B3GAT1
SOX117	2.67017e-55	0.546673	0.825	0.603	6.39959e-51	HCs2	SOX11
GRIA41	1.85749e-53	0.388915	0.153	0.031	4.45184e-49	HCs2	GRIA4
TENM11	1.96146e-53	0.445792	0.166	0.036	4.70104e-49	HCs2	TENM1
ONECUT16	3.08181e-53	0.68362	0.573	0.308	7.38617e-49	HCs2	ONECUT1
CHEK12	4.94542e-53	0.522107	0.341	0.128	1.18527e-48	HCs2	CHEK1
FAM171B3	5.40515e-53	0.604424	0.57	0.313	1.29545e-48	HCs2	FAM171B
LOC4228947	1.27625e-52	0.520533	0.396	0.158	3.0588e-48	HCs2	LOC422894
LOC107051722	2.98155e-51	0.388645	0.111	0.018	7.14588e-47	HCs2	LOC107051722
CLVS1	3.05426e-51	0.398314	0.146	0.03	7.32015e-47	HCs2	CLVS1
PTF1A8	4.11303e-51	0.564433	0.268	0.083	9.85771e-47	HCs2	PTF1A
MAB21L15	6.38135e-51	0.56301	0.71	0.464	1.52942e-46	HCs2	MAB21L1
BTG1L2	6.67267e-51	0.598129	0.473	0.226	1.59924e-46	HCs2	BTG1L
ZNF385C2	9.72864e-51	0.484851	0.239	0.071	2.33166e-46	HCs2	ZNF385C
LAPTM4B3	1.53359e-50	0.5542	0.314	0.112	3.67555e-46	HCs2	LAPTM4B
DYNLL16	5.29134e-50	0.576841	0.376	0.154	1.26818e-45	HCs2	DYNLL1
ISLR2	6.22285e-50	0.707336	0.116	0.02	1.49143e-45	HCs2	ISLR2
IMMP1L5	4.96641e-49	0.524423	0.387	0.163	1.1903e-44	HCs2	IMMP1L
LOC107054778	1.21067e-48	0.593126	0.371	0.154	2.90161e-44	HCs2	LOC107054778
CD164L21	1.69156e-48	0.346768	0.146	0.031	4.05415e-44	HCs2	CD164L2
DAAM15	2.69464e-48	0.531687	0.723	0.465	6.45824e-44	HCs2	DAAM1
LRRC75B6	3.56413e-48	0.573237	0.398	0.173	8.54216e-44	HCs2	LRRC75B
RAB3C	5.04858e-48	0.486446	0.215	0.062	1.20999e-43	HCs2	RAB3C
PPIA1	6.72975e-48	0.330621	0.978	0.962	1.61292e-43	HCs2	PPIA
SLC9A3R14	1.83383e-47	0.542287	0.427	0.193	4.39513e-43	HCs2	SLC9A3R1
NR6A13	2.33569e-47	0.572961	0.455	0.222	5.59795e-43	HCs2	NR6A1
CNTN41	2.46556e-46	0.421993	0.199	0.055	5.90921e-42	HCs2	CNTN4
GPM6A6	2.91577e-45	0.353766	0.893	0.665	6.98822e-41	HCs2	GPM6A
NME22	3.27386e-45	0.312965	0.982	0.974	7.84646e-41	HCs2	NME2
KCNH74	5.96787e-45	0.546719	0.338	0.137	1.43032e-40	HCs2	KCNH7
PAK34	1.13536e-44	0.477423	0.861	0.745	2.72112e-40	HCs2	PAK3
HSP90AB13	1.55254e-43	0.521076	0.715	0.492	3.72097e-39	HCs2	HSP90AB1
FAM212B	1.82994e-43	0.431656	0.231	0.074	4.38583e-39	HCs2	FAM212B
KIAA1211L1	6.44672e-43	0.355502	0.134	0.029	1.54509e-38	HCs2	KIAA1211L
GNG28	1.7523e-42	0.429614	0.538	0.276	4.19975e-38	HCs2	GNG2
ELMO15	1.98037e-42	0.53501	0.318	0.129	4.74635e-38	HCs2	ELMO1
LSAMP1	2.07833e-42	0.548307	0.232	0.076	4.98114e-38	HCs2	LSAMP
CHD45	1.1826e-41	0.432942	0.844	0.667	2.83433e-37	HCs2	CHD4
POU2F13	1.21874e-41	0.564126	0.498	0.276	2.92095e-37	HCs2	POU2F1
1947-03-01	3.52952e-41	0.49311	0.39	0.175	8.45921e-37	HCs2	2019-03-04
C14H16orf452	6.24714e-41	0.517485	0.368	0.166	1.49725e-36	HCs2	C14H16orf45
NDEL13	8.04103e-41	0.504588	0.328	0.138	1.92719e-36	HCs2	NDEL1
LOC112530080	1.43055e-40	0.471881	0.252	0.09	3.42859e-36	HCs2	LOC112530080
SORCS2	1.75532e-40	0.387447	0.15	0.037	4.20697e-36	HCs2	SORCS2
TRAF4	7.28172e-40	0.305041	0.126	0.028	1.74521e-35	HCs2	TRAF4
C23H1orf2161	7.65523e-40	0.438436	0.201	0.062	1.83473e-35	HCs2	C23H1orf216
ELP4	2.80317e-39	0.402417	0.175	0.051	6.71835e-35	HCs2	ELP4
PRNP5	3.82472e-39	0.422158	0.264	0.097	9.1667e-35	HCs2	PRNP
RGS37	8.52115e-39	0.720456	0.503	0.299	2.04226e-34	HCs2	RGS3
GRIN2B3	1.12955e-38	0.405365	0.188	0.057	2.70719e-34	HCs2	GRIN2B
CSDC25	2.25087e-38	0.427449	0.326	0.136	5.39466e-34	HCs2	CSDC2
RNASEK3	8.45972e-38	0.407853	0.85	0.713	2.02754e-33	HCs2	RNASEK
LRCH23	4.79811e-37	0.542116	0.406	0.205	1.14996e-32	HCs2	LRCH2
KIF1A8	6.00047e-37	0.471964	0.54	0.303	1.43813e-32	HCs2	KIF1A
SHROOM3	1.19409e-36	0.289	0.113	0.025	2.86187e-32	HCs2	SHROOM3
NFIL32	1.81384e-36	0.44225	0.354	0.161	4.34724e-32	HCs2	NFIL3
1936-09-01	2.58279e-36	0.500777	0.497	0.273	6.19018e-32	HCs2	2019-09-03
SAMD12	5.95565e-36	0.436622	0.264	0.103	1.42739e-31	HCs2	SAMD12
SH3BP54	3.18135e-35	0.382635	0.325	0.139	7.62473e-31	HCs2	SH3BP5
SH2B21	4.73855e-35	0.317969	0.129	0.032	1.13569e-30	HCs2	SH2B2
LOC1017480321	6.65616e-35	0.433236	0.277	0.114	1.59528e-30	HCs2	LOC101748032
FIGNL24	8.07205e-35	0.398633	0.298	0.124	1.93463e-30	HCs2	FIGNL2
NUAK11	1.00813e-34	0.372812	0.169	0.051	2.41619e-30	HCs2	NUAK1
PTPRZ11	1.0985e-34	0.342143	0.135	0.035	2.63278e-30	HCs2	PTPRZ1
NDUFA123	1.16283e-34	0.558875	0.49	0.297	2.78695e-30	HCs2	NDUFA12
NCOR11	1.74568e-34	0.490692	0.36	0.175	4.18386e-30	HCs2	NCOR1
GPM6B5	1.75481e-34	0.473288	0.64	0.43	4.20575e-30	HCs2	GPM6B
MLLT116	4.48316e-33	0.397808	0.653	0.421	1.07448e-28	HCs2	MLLT11
SBK16	5.73426e-33	0.42191	0.342	0.159	1.37433e-28	HCs2	SBK1
FYN3	9.20614e-33	0.487816	0.39	0.202	2.20643e-28	HCs2	FYN
CTBP12	9.05865e-32	0.441753	0.607	0.413	2.17109e-27	HCs2	CTBP1
VIM6	1.25012e-31	0.482776	0.522	0.326	2.99617e-27	HCs2	VIM
RBFOX28	1.60145e-31	0.375819	0.427	0.219	3.83818e-27	HCs2	RBFOX2
EVL2	1.84981e-31	0.424249	0.455	0.251	4.43344e-27	HCs2	EVL
LOC1017506101	2.2328e-31	0.329088	0.145	0.042	5.35136e-27	HCs2	LOC101750610
FERMT24	2.46195e-31	0.444674	0.553	0.346	5.90056e-27	HCs2	FERMT2
LOC1070528374	3.26949e-31	0.461355	0.272	0.118	7.83598e-27	HCs2	LOC107052837
LOC1070505953	8.39514e-31	0.496744	0.401	0.214	2.01206e-26	HCs2	LOC107050595
METTL6	1.85983e-30	0.414754	0.202	0.075	4.45746e-26	HCs2	METTL6
FEZ15	2.02356e-30	0.418894	0.365	0.182	4.84986e-26	HCs2	FEZ1
CEP170B1	3.97441e-30	0.428062	0.438	0.246	9.52547e-26	HCs2	CEP170B
SSBP42	1.91293e-29	0.441623	0.299	0.14	4.58473e-25	HCs2	SSBP4
CRMP16	3.39915e-29	0.406849	0.568	0.373	8.14673e-25	HCs2	CRMP1
SSBP32	5.85818e-29	0.398142	0.732	0.569	1.40403e-24	HCs2	SSBP3
DPYSL44	7.77936e-29	0.395967	0.301	0.139	1.86448e-24	HCs2	DPYSL4
OLFM14	8.67209e-29	0.412293	0.379	0.195	2.07844e-24	HCs2	OLFM1
RUSC25	1.56127e-28	0.379512	0.217	0.084	3.74189e-24	HCs2	RUSC2
KCNH25	1.90586e-28	0.336003	0.365	0.181	4.56778e-24	HCs2	KCNH2
ENY21	4.02285e-28	0.43448	0.599	0.421	9.64157e-24	HCs2	ENY2
PLPP1	7.84548e-28	0.366432	0.135	0.041	1.88033e-23	HCs2	PLPP1
OAZ12	1.18055e-27	0.266548	0.941	0.875	2.82941e-23	HCs2	OAZ1
PHF21B2	1.76369e-27	0.413011	0.374	0.197	4.22703e-23	HCs2	PHF21B
MSANTD41	6.17192e-27	0.401342	0.312	0.154	1.47922e-22	HCs2	MSANTD4
NETO23	7.95319e-27	0.39275	0.36	0.188	1.90614e-22	HCs2	NETO2
SH3BGRL1	8.32716e-27	0.438715	0.266	0.124	1.99577e-22	HCs2	SH3BGRL
TMEM132C	1.20459e-26	0.299862	0.107	0.029	2.88703e-22	HCs2	TMEM132C
CELF43	1.27575e-26	0.449574	0.328	0.166	3.0576e-22	HCs2	CELF4
MAPK64	1.27848e-26	0.326785	0.83	0.704	3.06413e-22	HCs2	MAPK6
MAB21L27	4.21298e-26	0.29397	0.342	0.165	1.00973e-21	HCs2	MAB21L2
NOVA15	4.36032e-26	0.385141	0.5	0.305	1.04504e-21	HCs2	NOVA1
SLIRP3	5.2746e-26	0.356171	0.828	0.684	1.26416e-21	HCs2	SLIRP
LIM2	6.83027e-26	0.312236	0.156	0.054	1.63701e-21	HCs2	LIM2
MYT1L8	7.17697e-26	0.34966	0.236	0.101	1.7201e-21	HCs2	MYT1L
RTN23	7.77542e-26	0.385428	0.416	0.235	1.86353e-21	HCs2	RTN2
PDE3A2	1.26193e-25	0.335273	0.174	0.063	3.02447e-21	HCs2	PDE3A
GRIPAP13	1.36266e-25	0.463956	0.266	0.126	3.26589e-21	HCs2	GRIPAP1
FAM43A4	1.51401e-25	0.421643	0.467	0.284	3.62862e-21	HCs2	FAM43A
NDUFB101	1.59067e-25	0.376023	0.658	0.489	3.81235e-21	HCs2	NDUFB10
TMEM9B3	1.64631e-25	0.410252	0.537	0.365	3.94571e-21	HCs2	TMEM9B
KCTD11	4.68526e-25	0.284971	0.139	0.045	1.12292e-20	HCs2	KCTD1
GPATCH111	4.83484e-25	0.361054	0.315	0.16	1.15877e-20	HCs2	GPATCH11
GPR272	1.13862e-24	0.405411	0.368	0.203	2.72893e-20	HCs2	GPR27
MEGF102	3.29196e-24	0.427254	0.197	0.081	7.88984e-20	HCs2	MEGF10
EPHB22	1.01615e-23	0.559928	0.288	0.149	2.43541e-19	HCs2	EPHB2
CNP	1.29553e-23	0.316042	0.132	0.044	3.10498e-19	HCs2	CNP
ATRN2	1.45102e-23	0.476898	0.395	0.235	3.47765e-19	HCs2	ATRN
KLHL354	1.78912e-23	0.348055	0.459	0.277	4.28799e-19	HCs2	KLHL35
EFNB16	2.54975e-23	0.459781	0.451	0.277	6.11099e-19	HCs2	EFNB1
PCDH81	2.99207e-23	0.330218	0.14	0.048	7.1711e-19	HCs2	PCDH8
TNC1	4.49625e-23	0.288669	0.108	0.032	1.07762e-18	HCs2	TNC
KLHL93	7.16605e-23	0.515411	0.231	0.108	1.71749e-18	HCs2	KLHL9
LOC1017481531	7.38124e-23	0.276966	0.169	0.064	1.76906e-18	HCs2	LOC101748153
TNIK4	1.39417e-22	0.366213	0.382	0.222	3.3414e-18	HCs2	TNIK
NRXN15	1.64971e-22	0.338474	0.396	0.222	3.95386e-18	HCs2	NRXN1
PARP8	3.27758e-22	0.258338	0.105	0.031	7.85538e-18	HCs2	PARP8
RTN17	3.52849e-22	0.287661	0.298	0.147	8.45674e-18	HCs2	RTN1
PCDHGC36	3.97807e-22	0.356029	0.406	0.235	9.53424e-18	HCs2	PCDHGC3
DUSP233	4.30096e-22	0.342843	0.365	0.206	1.03081e-17	HCs2	DUSP23
MTSS15	1.15822e-21	0.389891	0.366	0.208	2.77591e-17	HCs2	MTSS1
NCS16	1.63285e-21	0.328903	0.424	0.255	3.91345e-17	HCs2	NCS1
LYPD6	2.49399e-21	0.319931	0.166	0.066	5.97736e-17	HCs2	LYPD6
DNMT3A6	3.05493e-21	0.336826	0.686	0.525	7.32174e-17	HCs2	DNMT3A
MYLIP	3.60263e-21	0.269624	0.131	0.045	8.63443e-17	HCs2	MYLIP
CHRNA72	3.88169e-21	0.338059	0.145	0.054	9.30325e-17	HCs2	CHRNA7
FAM89A2	7.83621e-21	0.411083	0.385	0.235	1.8781e-16	HCs2	FAM89A
COPS93	1.96766e-20	0.275531	0.844	0.745	4.7159e-16	HCs2	COPS9
LOC1125328903	2.05251e-20	0.347954	0.42	0.266	4.91925e-16	HCs2	LOC112532890
APP4	2.19593e-20	0.32401	0.611	0.448	5.26298e-16	HCs2	APP
PAPPA1	2.42185e-20	0.366622	0.153	0.061	5.80445e-16	HCs2	PAPPA
SYT46	4.76978e-20	0.327669	0.263	0.131	1.14317e-15	HCs2	SYT4
ADD26	1.05299e-19	0.285655	0.361	0.204	2.52369e-15	HCs2	ADD2
PXYLP18	1.2605e-19	0.346738	0.291	0.158	3.02103e-15	HCs2	PXYLP1
DUSP141	1.32845e-19	0.361711	0.295	0.159	3.1839e-15	HCs2	DUSP14
KDM5B3	2.73962e-19	0.317019	0.586	0.42	6.56604e-15	HCs2	KDM5B
TMEM150C	4.7341e-19	0.275463	0.137	0.052	1.13462e-14	HCs2	TMEM150C
ACTL6B2	5.07387e-19	0.341259	0.385	0.236	1.21605e-14	HCs2	ACTL6B
MDK7	7.8027e-19	0.298443	0.352	0.2	1.87007e-14	HCs2	MDK
SCG35	9.48157e-19	0.30881	0.427	0.261	2.27245e-14	HCs2	SCG3
PLPPR5	1.23316e-18	0.267686	0.105	0.035	2.95552e-14	HCs2	PLPPR5
ZNF503	1.57185e-18	0.280701	0.161	0.067	3.76724e-14	HCs2	ZNF503
NDUFB92	1.66722e-18	0.327788	0.524	0.37	3.99582e-14	HCs2	NDUFB9
DNER1	3.07685e-18	0.333129	0.158	0.067	7.3743e-14	HCs2	DNER
WDFY2	3.29642e-18	0.251632	0.123	0.045	7.90054e-14	HCs2	WDFY2
C5H14orf376	3.70439e-18	0.310024	0.266	0.14	8.87831e-14	HCs2	C5H14orf37
SORCS11	5.07536e-18	0.330218	0.137	0.054	1.21641e-13	HCs2	SORCS1
ONECUT26	9.3655e-18	0.349747	0.541	0.407	2.24463e-13	HCs2	ONECUT2
TMTC26	1.00609e-17	0.302801	0.229	0.114	2.4113e-13	HCs2	TMTC2
HIST1H4D	1.64186e-17	0.343645	0.212	0.104	3.93505e-13	HCs2	HIST1H4D
BTBD10	1.78397e-17	0.263219	0.21	0.1	4.27563e-13	HCs2	BTBD10
QKI5	2.72027e-17	0.398547	0.336	0.205	6.51968e-13	HCs2	QKI
RBM53	3.07611e-17	0.288561	0.53	0.37	7.37251e-13	HCs2	RBM5
PTPRG2	4.64708e-17	0.333825	0.223	0.115	1.11377e-12	HCs2	PTPRG
ORAOV11	5.22985e-17	0.410235	0.357	0.226	1.25344e-12	HCs2	ORAOV1
LOC1070516494	5.31556e-17	0.328077	0.29	0.164	1.27398e-12	HCs2	LOC107051649
GPR852	6.30141e-17	0.356419	0.338	0.206	1.51026e-12	HCs2	GPR85
TNRC6C2	1.08437e-16	0.365759	0.537	0.397	2.59891e-12	HCs2	TNRC6C
GRK41	1.18917e-16	0.31786	0.226	0.117	2.85007e-12	HCs2	GRK4
ZNF6441	1.47103e-16	0.327104	0.586	0.448	3.52561e-12	HCs2	ZNF644
LOC1070531821	1.70058e-16	0.350671	0.346	0.215	4.07578e-12	HCs2	LOC107053182
MAST32	2.51562e-16	0.279133	0.158	0.07	6.02918e-12	HCs2	MAST3
TMEM255A5	2.6944e-16	0.266292	0.275	0.151	6.45767e-12	HCs2	TMEM255A
FCRL41	2.74173e-16	0.281009	0.18	0.084	6.57109e-12	HCs2	FCRL4
HIST1H2BF1	6.31932e-16	0.318138	0.22	0.113	1.51455e-11	HCs2	HIST1H2BF
ZEB23	8.49899e-16	0.286658	0.425	0.282	2.03695e-11	HCs2	ZEB2
LOC7683925	1.34066e-15	0.465988	0.444	0.315	3.21316e-11	HCs2	LOC768392
RFX71	1.70202e-15	0.321036	0.323	0.198	4.07923e-11	HCs2	RFX7
MID1	2.17233e-15	0.287847	0.194	0.097	5.20643e-11	HCs2	MID1
SARS6	3.28355e-15	0.296694	0.637	0.517	7.86969e-11	HCs2	SARS
HDGFRP34	3.57823e-15	0.296373	0.4	0.264	8.57594e-11	HCs2	HDGFRP3
SKI3	3.86798e-15	0.273516	0.264	0.148	9.27039e-11	HCs2	SKI
HMX13	4.47041e-15	0.280579	0.419	0.278	1.07142e-10	HCs2	HMX1
MMD1	5.03664e-15	0.30018	0.334	0.209	1.20713e-10	HCs2	MMD
PHC24	5.5303e-15	0.256165	0.639	0.506	1.32545e-10	HCs2	PHC2
SOX132	7.7204e-15	0.278818	0.196	0.099	1.85035e-10	HCs2	SOX13
SKIDA12	9.48523e-15	0.340608	0.303	0.182	2.27332e-10	HCs2	SKIDA1
NKAIN45	1.07818e-14	0.280557	0.245	0.136	2.58407e-10	HCs2	NKAIN4
TMOD24	1.21969e-14	0.273079	0.247	0.137	2.92323e-10	HCs2	TMOD2
SPRY1	2.10334e-14	0.274232	0.205	0.108	5.04108e-10	HCs2	SPRY1
FAM117B1	4.0196e-14	0.28918	0.301	0.185	9.63379e-10	HCs2	FAM117B
SIRT61	4.24822e-14	0.276468	0.303	0.183	1.01817e-09	HCs2	SIRT6
LRRN24	9.14742e-14	0.292554	0.371	0.242	2.19236e-09	HCs2	LRRN2
NRG37	1.02051e-13	0.289742	0.25	0.142	2.44585e-09	HCs2	NRG3
KCNAB2	1.09322e-13	0.292747	0.301	0.185	2.62012e-09	HCs2	KCNAB2
PHF141	1.16172e-13	0.290447	0.561	0.432	2.7843e-09	HCs2	PHF14
DAB2IP4	1.20042e-13	0.2535	0.484	0.339	2.87705e-09	HCs2	DAB2IP
FRMD4A5	1.21336e-13	0.323527	0.368	0.245	2.90807e-09	HCs2	FRMD4A
CENPV1	2.1528e-13	0.26326	0.196	0.104	5.15961e-09	HCs2	CENPV
HIST1H2BO	4.34783e-13	0.266892	0.151	0.073	1.04204e-08	HCs2	HIST1H2BO
LOC1125313901	4.88193e-13	0.282907	0.108	0.045	1.17005e-08	HCs2	LOC112531390
CENPX3	5.18543e-13	0.266071	0.363	0.241	1.24279e-08	HCs2	CENPX
KDM7A	5.39908e-13	0.253987	0.175	0.089	1.294e-08	HCs2	KDM7A
GST2L2	5.54154e-13	0.29218	0.545	0.424	1.32814e-08	HCs2	GST2L
ACAP36	6.35705e-13	0.251669	0.373	0.246	1.52359e-08	HCs2	ACAP3
HIF1A1	9.4333e-13	0.28782	0.393	0.277	2.26088e-08	HCs2	HIF1A
ZNF5322	1.62786e-12	0.250868	0.333	0.214	3.9015e-08	HCs2	ZNF532
CORO1C2	1.86864e-12	0.28474	0.349	0.23	4.47857e-08	HCs2	CORO1C
PNISR2	2.21259e-12	0.284993	0.561	0.45	5.30292e-08	HCs2	PNISR
COMMD11	2.79229e-12	0.273512	0.263	0.162	6.69229e-08	HCs2	COMMD1
HIST1H2B7L24	5.21068e-12	0.267827	0.236	0.138	1.24884e-07	HCs2	HIST1H2B7L2
RCAN21	6.24639e-12	0.294466	0.119	0.055	1.49707e-07	HCs2	RCAN2
LOC776275	9.52695e-12	0.258355	0.186	0.103	2.28332e-07	HCs2	LOC776275
RAB3IP3	1.19705e-11	0.258912	0.21	0.12	2.86896e-07	HCs2	RAB3IP
MED13L2	1.3236e-11	0.264879	0.318	0.209	3.17227e-07	HCs2	MED13L
TMX31	2.59234e-11	0.255568	0.236	0.141	6.21307e-07	HCs2	TMX3
HIKESHI	3.01956e-11	0.264619	0.449	0.337	7.23697e-07	HCs2	HIKESHI
OSBPL21	3.26882e-11	0.272169	0.212	0.124	7.83439e-07	HCs2	OSBPL2
COG61	4.24491e-11	0.254899	0.244	0.149	1.01738e-06	HCs2	COG6
DYNC1I14	4.26107e-11	0.315134	0.32	0.216	1.02125e-06	HCs2	DYNC1I1
CAPN101	1.10376e-10	0.250187	0.205	0.119	2.64538e-06	HCs2	CAPN10
NCKAP56	1.54396e-10	0.312226	0.247	0.155	3.7004e-06	HCs2	NCKAP5
NT5DC21	1.98737e-10	0.26697	0.268	0.173	4.76313e-06	HCs2	NT5DC2
KBTBD116	2.94114e-10	0.270116	0.285	0.185	7.04904e-06	HCs2	KBTBD11
LOC1125327641	6.25669e-10	0.288561	0.182	0.105	1.49954e-05	HCs2	LOC112532764
RHOF2	2.51075e-09	0.264895	0.369	0.269	6.0175e-05	HCs2	RHOF
NAV24	4.87162e-09	0.266112	0.282	0.191	0.000116758	HCs2	NAV2
TOX24	6.79128e-09	0.274477	0.272	0.184	0.000162767	HCs2	TOX2
PROX15	2.0626e-08	0.440387	0.277	0.197	0.000494343	HCs2	PROX1
EEF1A27	5.63168e-08	0.292145	0.25	0.167	0.00134975	HCs2	EEF1A2

## Sheet: RGC
	p_val	avg_logFC	pct.1	pct.2	p_val_adj	cluster	gene
EBF34	0	2.23429	0.673	0.059	0	RGCs	EBF3
HEY14	0	1.77094	0.787	0.129	0	RGCs	HEY1
GAP433	0	1.70947	0.834	0.077	0	RGCs	GAP43
ELAVL44	0	1.66385	0.97	0.451	0	RGCs	ELAVL4
RPRML	0	1.66245	0.491	0.033	0	RGCs	RPRML
AGRN4	0	1.61234	0.901	0.252	0	RGCs	AGRN
POU4F3	0	1.56424	0.691	0.024	0	RGCs	POU4F3
ISL1	0	1.5593	0.481	0.027	0	RGCs	ISL1
GNG24	0	1.48819	0.867	0.245	0	RGCs	GNG2
SP84	0	1.48204	0.742	0.073	0	RGCs	SP8
FABP54	0	1.47466	0.767	0.172	0	RGCs	FABP5
CNTN2	0	1.44904	0.601	0.026	0	RGCs	CNTN2
TMSB15B4	0	1.40244	0.986	0.629	0	RGCs	TMSB15B
SYT74	0	1.39981	0.8	0.159	0	RGCs	SYT7
CNR13	0	1.37003	0.677	0.079	0	RGCs	CNR1
DPYSL22	0	1.36061	0.974	0.673	0	RGCs	DPYSL2
CXCR41	0	1.331	0.585	0.041	0	RGCs	CXCR4
TMEM132E4	0	1.32458	0.758	0.123	0	RGCs	TMEM132E
DLX23	0	1.30376	0.566	0.078	0	RGCs	DLX2
RBPMS2	0	1.27602	0.543	0.017	0	RGCs	RBPMS2
MAB21L24	0	1.27142	0.681	0.134	0	RGCs	MAB21L2
RTN14	0	1.24216	0.695	0.112	0	RGCs	RTN1
RBM24	0	1.23695	0.473	0.028	0	RGCs	RBM24
CDK5R14	0	1.22403	0.796	0.213	0	RGCs	CDK5R1
YWHAG4	0	1.21983	0.993	0.676	0	RGCs	YWHAG
DDAH1	0	1.17892	0.461	0.04	0	RGCs	DDAH1
TMEM1213	0	1.17486	0.591	0.067	0	RGCs	TMEM121
OSBPL5	0	1.17308	0.501	0.024	0	RGCs	OSBPL5
ASTN22	0	1.14427	0.488	0.058	0	RGCs	ASTN2
C3orf70	0	1.12889	0.456	0.011	0	RGCs	C3orf70
KAZN	0	1.08392	0.499	0.05	0	RGCs	KAZN
NRN11	0	1.06872	0.313	0.022	0	RGCs	NRN1
TUSC5	0	0.983193	0.371	0.012	0	RGCs	TUSC5
POU4F2	0	0.97594	0.332	0.015	0	RGCs	POU4F2
DLGAP3	0	0.936036	0.414	0.024	0	RGCs	DLGAP3
EBF2	0	0.817572	0.336	0.018	0	RGCs	EBF2
NTN4L	0	0.792429	0.315	0.013	0	RGCs	NTN4L
SNCG	0	0.769479	0.28	0.011	0	RGCs	SNCG
LZTS1	0	0.625938	0.247	0.008	0	RGCs	LZTS1
BARHL1	0	0.601668	0.201	0.001	0	RGCs	BARHL1
LOC107052075	0	0.547322	0.218	0.006	0	RGCs	LOC107052075
TUBA1A4	1.32218e-307	0.86591	0.999	0.993	3.16886e-303	RGCs	TUBA1A
GMEB24	2.48101e-307	1.32547	0.917	0.354	5.94624e-303	RGCs	GMEB2
UCHL13	1.01439e-306	1.38825	0.863	0.297	2.43119e-302	RGCs	UCHL1
STMN24	6.57687e-306	1.22957	0.951	0.389	1.57628e-301	RGCs	STMN2
TIMM104	1.42179e-304	1.37028	0.915	0.407	3.40761e-300	RGCs	TIMM10
NHLH12	3.4684e-304	1.0066	0.624	0.115	8.31271e-300	RGCs	NHLH1
RASGEF1B	5.3285e-293	0.803962	0.401	0.044	1.27708e-288	RGCs	RASGEF1B
CRIP22	1.48974e-291	1.05061	0.607	0.118	3.57046e-287	RGCs	CRIP2
PNOC	2.33516e-290	0.673596	0.206	0.006	5.59667e-286	RGCs	PNOC
MAP1B4	2.66582e-282	1.22605	0.974	0.584	6.38918e-278	RGCs	MAP1B
TUBB34	3.8802e-282	1.24009	0.976	0.553	9.29967e-278	RGCs	TUBB3
HMP191	1.7528e-274	1.00635	0.438	0.06	4.20095e-270	RGCs	HMP19
SLC22A233	1.03013e-267	1.06731	0.615	0.134	2.46891e-263	RGCs	SLC22A23
KIAA1324L	8.95551e-267	0.606184	0.281	0.021	2.14637e-262	RGCs	KIAA1324L
EBF14	1.24883e-264	0.923828	0.485	0.077	2.99308e-260	RGCs	EBF1
ATRNL1	1.56745e-264	0.730282	0.377	0.043	3.7567e-260	RGCs	ATRNL1
NELL22	8.52843e-263	1.0651	0.552	0.107	2.04401e-258	RGCs	NELL2
TMEM163	4.9979e-259	0.603938	0.269	0.019	1.19785e-254	RGCs	TMEM163
KLF73	3.93138e-257	0.921207	0.537	0.099	9.42234e-253	RGCs	KLF7
NAV3	5.78227e-254	0.553024	0.217	0.011	1.38584e-249	RGCs	NAV3
KALRN3	1.29797e-249	0.997294	0.809	0.247	3.11085e-245	RGCs	KALRN
STMN31	3.90831e-249	0.759387	0.423	0.059	9.36705e-245	RGCs	STMN3
BASP14	1.13483e-248	0.921029	0.997	0.863	2.71984e-244	RGCs	BASP1
GPM6A3	2.67916e-247	1.00423	0.987	0.654	6.42113e-243	RGCs	GPM6A
TUBB2B4	5.83033e-246	1.07007	0.975	0.677	1.39735e-241	RGCs	TUBB2B
LINGO3	2.77547e-244	0.689906	0.326	0.034	6.65197e-240	RGCs	LINGO3
RUSC23	1.33451e-241	0.770698	0.434	0.065	3.19842e-237	RGCs	RUSC2
SPIRE21	1.89429e-234	0.845546	0.403	0.059	4.54003e-230	RGCs	SPIRE2
IGSF3	8.50979e-232	0.679225	0.335	0.039	2.03954e-227	RGCs	IGSF3
SLIT14	9.72967e-231	1.34434	0.782	0.253	2.33191e-226	RGCs	SLIT1
EPB41L3	4.38473e-225	0.710912	0.251	0.02	1.05089e-220	RGCs	EPB41L3
CAMK2N1	2.23948e-224	0.732205	0.371	0.051	5.36735e-220	RGCs	CAMK2N1
TMEM35B1	4.90749e-220	0.779191	0.376	0.053	1.17618e-215	RGCs	TMEM35B
SRGAP12	1.53322e-219	0.941393	0.578	0.137	3.67466e-215	RGCs	SRGAP1
TMSB4X4	1.94058e-218	0.894917	1	0.983	4.651e-214	RGCs	TMSB4X
DLX13	2.07465e-212	0.866923	0.457	0.084	4.97231e-208	RGCs	DLX1
VAT13	3.655e-210	0.918028	0.578	0.139	8.75994e-206	RGCs	VAT1
NBEA3	6.46786e-210	0.943374	0.735	0.243	1.55015e-205	RGCs	NBEA
DBNDD12	6.59533e-209	0.911268	0.673	0.193	1.5807e-204	RGCs	DBNDD1
OLFM12	5.16361e-208	0.975567	0.627	0.172	1.23756e-203	RGCs	OLFM1
TMEM161A3	2.16364e-205	1.09094	0.693	0.224	5.18561e-201	RGCs	TMEM161A
DAPK2	1.5107e-204	0.450332	0.184	0.01	3.62068e-200	RGCs	DAPK2
MAP62	3.57677e-202	1.05786	0.845	0.374	8.57244e-198	RGCs	MAP6
TPD52	4.84464e-200	0.666077	0.306	0.038	1.16111e-195	RGCs	TPD52
RAB6A4	3.61169e-199	0.957033	0.954	0.718	8.65614e-195	RGCs	RAB6A
TP53I112	1.34148e-198	1.03662	0.765	0.295	3.21512e-194	RGCs	TP53I11
SLC8A1	8.63647e-197	0.419622	0.173	0.009	2.0699e-192	RGCs	SLC8A1
OPCML	2.26504e-191	0.635594	0.281	0.033	5.42861e-187	RGCs	OPCML
JARID21	2.03902e-187	0.787266	0.518	0.12	4.88692e-183	RGCs	JARID2
ADCYAP14	2.25306e-187	0.748462	0.715	0.217	5.39992e-183	RGCs	ADCYAP1
PDE11A	1.11311e-184	0.332089	0.127	0.004	2.66778e-180	RGCs	PDE11A
NEFM2	2.99425e-183	0.814081	0.392	0.072	7.17633e-179	RGCs	NEFM
TAC3	6.32429e-179	0.541503	0.216	0.019	1.51574e-174	RGCs	TAC3
LRRC55	6.45866e-179	0.364974	0.141	0.006	1.54795e-174	RGCs	LRRC55
FGF13	4.42746e-177	0.692685	0.264	0.032	1.06113e-172	RGCs	FGF13
LRRC75B3	3.07866e-175	0.798383	0.574	0.155	7.37864e-171	RGCs	LRRC75B
CACNA1E	1.27561e-173	0.616887	0.298	0.042	3.05724e-169	RGCs	CACNA1E
KIF21A2	1.95305e-173	0.871809	0.674	0.228	4.68087e-169	RGCs	KIF21A
TCF24	3.5865e-173	0.48113	0.125	0.004	8.59577e-169	RGCs	TCF24
NUBPL	1.11952e-172	0.678014	0.279	0.037	2.68315e-168	RGCs	NUBPL
CLASP13	3.26863e-171	0.892835	0.782	0.338	7.83393e-167	RGCs	CLASP1
ASIC44	1.65323e-168	1.09479	0.428	0.093	3.96229e-164	RGCs	ASIC4
SULF24	1.19905e-167	0.877219	0.562	0.157	2.87376e-163	RGCs	SULF2
ECEL11	7.58014e-167	0.679952	0.318	0.05	1.81673e-162	RGCs	ECEL1
ACTB1	3.89078e-165	0.588596	0.995	0.962	9.32504e-161	RGCs	ACTB
JAKMIP1	5.39583e-164	0.390301	0.173	0.012	1.29322e-159	RGCs	JAKMIP1
CPLX24	3.13061e-160	0.800642	0.666	0.218	7.50314e-156	RGCs	CPLX2
DOK4	1.09108e-159	0.536627	0.277	0.039	2.61498e-155	RGCs	DOK4
UNC5D	1.42612e-159	0.343391	0.125	0.005	3.41799e-155	RGCs	UNC5D
BRSK22	9.99768e-159	0.774505	0.628	0.197	2.39614e-154	RGCs	BRSK2
NREP4	6.0457e-156	0.950693	0.811	0.412	1.44897e-151	RGCs	NREP
PAX64	8.55125e-156	0.766126	0.926	0.486	2.04948e-151	RGCs	PAX6
ITM2C	4.34425e-155	0.518784	0.231	0.027	1.04119e-150	RGCs	ITM2C
EPHB3	1.25348e-152	0.659741	0.307	0.052	3.0042e-148	RGCs	EPHB3
MSI22	6.76056e-152	0.81613	0.88	0.492	1.6203e-147	RGCs	MSI2
EYA2	1.43946e-151	0.370747	0.145	0.009	3.44996e-147	RGCs	EYA2
RALGDS3	3.15034e-150	0.646597	0.419	0.093	7.55042e-146	RGCs	RALGDS
PCSK2	7.80946e-150	0.410641	0.17	0.014	1.87169e-145	RGCs	PCSK2
MGAT5B	6.48813e-149	0.353652	0.135	0.007	1.55501e-144	RGCs	MGAT5B
ANGPTL4	7.07612e-148	0.495029	0.217	0.025	1.69593e-143	RGCs	ANGPTL4
SOX124	4.88314e-147	0.735516	0.547	0.157	1.17034e-142	RGCs	SOX12
MYT12	7.93448e-146	0.790751	0.936	0.604	1.90166e-141	RGCs	MYT1
LOC1125328924	1.37448e-145	0.844014	0.591	0.195	3.29421e-141	RGCs	LOC112532892
ENOX1	1.44137e-145	0.554719	0.277	0.043	3.45454e-141	RGCs	ENOX1
KIF1A4	5.36931e-143	0.778546	0.723	0.285	1.28686e-138	RGCs	KIF1A
PSD31	6.54664e-143	0.553988	0.297	0.05	1.56903e-138	RGCs	PSD3
CRABP14	2.47801e-142	0.864439	0.694	0.263	5.93904e-138	RGCs	CRABP1
LOC100857745	3.33468e-141	0.266201	0.105	0.004	7.99223e-137	RGCs	LOC100857745
FBXL16	3.45819e-140	0.534999	0.289	0.048	8.28825e-136	RGCs	FBXL16
REEP13	1.10011e-139	0.924659	0.565	0.182	2.63664e-135	RGCs	REEP1
TMSB4Y4	3.86622e-139	0.666922	0.968	0.603	9.26616e-135	RGCs	TMSB4Y
PLXNA13	6.07322e-139	0.95598	0.803	0.436	1.45557e-134	RGCs	PLXNA1
LOC107054937	5.03023e-136	0.383573	0.164	0.015	1.2056e-131	RGCs	LOC107054937
DPYSL31	1.06581e-135	0.692229	0.473	0.128	2.55443e-131	RGCs	DPYSL3
ARL4C3	8.09567e-134	0.785365	0.75	0.337	1.94029e-129	RGCs	ARL4C
C4H4ORF50	3.86763e-133	0.330653	0.131	0.008	9.26954e-129	RGCs	C4H4ORF50
XPR11	5.81901e-133	0.860952	0.627	0.245	1.39464e-128	RGCs	XPR1
AHR1B4	6.21569e-133	0.594941	0.576	0.181	1.48971e-128	RGCs	AHR1B
IGDCC31	6.31187e-132	0.659639	0.353	0.077	1.51276e-127	RGCs	IGDCC3
MTCL13	1.38611e-131	0.640362	0.371	0.084	3.32208e-127	RGCs	MTCL1
PAG1	5.91391e-130	0.584134	0.321	0.064	1.41739e-125	RGCs	PAG1
FOXO63	1.40616e-125	0.750775	0.622	0.237	3.37015e-121	RGCs	FOXO6
SMTNL1	1.4499e-125	0.43489	0.191	0.023	3.47497e-121	RGCs	SMTNL1
TMOD22	1.68685e-124	0.631721	0.444	0.119	4.04288e-120	RGCs	TMOD2
TMEM200C	5.33694e-124	0.471693	0.233	0.035	1.2791e-119	RGCs	TMEM200C
MLLT113	5.65128e-122	0.713515	0.795	0.406	1.35444e-117	RGCs	MLLT11
AMER14	8.14003e-122	0.632971	0.535	0.171	1.95092e-117	RGCs	AMER1
TPPP31	1.65298e-121	0.497899	0.252	0.042	3.9617e-117	RGCs	TPPP3
CADPS	7.89815e-121	0.529502	0.286	0.055	1.89295e-116	RGCs	CADPS
LOC107053504	9.77213e-121	0.392677	0.154	0.015	2.34209e-116	RGCs	LOC107053504
MINDY4B	1.87131e-120	0.406858	0.197	0.026	4.48496e-116	RGCs	MINDY4B
NSG13	2.00669e-120	0.745596	0.657	0.274	4.80943e-116	RGCs	NSG1
OAZ21	1.91755e-119	0.716089	0.686	0.297	4.5958e-115	RGCs	OAZ2
BRINP14	9.40239e-119	0.597998	0.507	0.153	2.25347e-114	RGCs	BRINP1
FRMD4A3	5.70503e-118	0.734527	0.594	0.224	1.36732e-113	RGCs	FRMD4A
TTC283	7.23985e-118	0.572436	0.39	0.098	1.73518e-113	RGCs	TTC28
HS3ST21	5.75406e-117	0.65383	0.302	0.063	1.37907e-112	RGCs	HS3ST2
TSPAN131	5.26838e-116	0.675004	0.481	0.153	1.26267e-111	RGCs	TSPAN13
NRG1	1.66534e-115	0.390999	0.194	0.026	3.99133e-111	RGCs	NRG1
POU6F2	5.41513e-115	0.318705	0.112	0.007	1.29784e-110	RGCs	POU6F2
APLP23	4.22648e-114	0.685143	0.593	0.223	1.01296e-109	RGCs	APLP2
NFIC	4.56313e-112	0.598731	0.313	0.07	1.09365e-107	RGCs	NFIC
LDLRAD42	6.41367e-112	0.67853	0.39	0.107	1.53716e-107	RGCs	LDLRAD4
PELI23	2.67654e-110	0.748263	0.566	0.216	6.41485e-106	RGCs	PELI2
AKAP61	2.00142e-108	0.473818	0.246	0.045	4.79681e-104	RGCs	AKAP6
OAZ11	4.02154e-108	0.539879	0.98	0.871	9.63843e-104	RGCs	OAZ1
ST182	4.26756e-108	0.602695	0.411	0.115	1.02281e-103	RGCs	ST18
MYT1L4	2.20879e-107	0.526642	0.357	0.089	5.29381e-103	RGCs	MYT1L
SNCB3	5.0855e-107	0.572059	0.39	0.105	1.21884e-102	RGCs	SNCB
SRCRB4D	9.95595e-107	0.421351	0.206	0.032	2.38614e-102	RGCs	SRCRB4D
MAPT3	1.33136e-105	0.549557	0.415	0.118	3.19086e-101	RGCs	MAPT
C14orf1322	1.75938e-105	0.574258	0.509	0.167	4.21669e-101	RGCs	C14orf132
RAP1GAP1	2.68758e-105	0.407973	0.183	0.026	6.44131e-101	RGCs	RAP1GAP1
IER5L4	4.2595e-105	0.610201	0.539	0.189	1.02088e-100	RGCs	IER5L
CRMP12	1.61371e-104	0.639238	0.739	0.356	3.86757e-100	RGCs	CRMP1
WBSCR17	2.38031e-103	0.529079	0.271	0.056	5.70488e-99	RGCs	WBSCR17
TMEFF13	2.66923e-103	0.679557	0.619	0.26	6.39733e-99	RGCs	TMEFF1
MEF2B	5.62865e-103	0.394861	0.152	0.018	1.34902e-98	RGCs	MEF2B
MAP1S2	2.36701e-101	0.649408	0.82	0.483	5.67301e-97	RGCs	MAP1S
STK32C	1.20209e-100	0.402217	0.193	0.03	2.88105e-96	RGCs	STK32C
SCG32	2.21679e-100	0.714038	0.598	0.244	5.31297e-96	RGCs	SCG3
CHGB3	9.89866e-100	0.624124	0.632	0.26	2.37241e-95	RGCs	CHGB
GPRC5C	9.92547e-100	0.286713	0.108	0.008	2.37884e-95	RGCs	GPRC5C
FKBP1C2	1.00066e-99	0.511368	0.958	0.801	2.39828e-95	RGCs	FKBP1C
ARHGEF9	1.10609e-99	0.297427	0.108	0.008	2.65096e-95	RGCs	ARHGEF9
MAPK12	2.91391e-99	0.492764	0.263	0.055	6.98378e-95	RGCs	MAPK12
SIX33	1.84648e-98	0.54489	0.947	0.716	4.42547e-94	RGCs	SIX3
SHISA6	1.92523e-97	0.318826	0.131	0.014	4.61421e-93	RGCs	SHISA6
UNC5A1	4.00526e-97	0.346233	0.176	0.025	9.5994e-93	RGCs	UNC5A
CDH122	1.53277e-96	0.560639	0.491	0.167	3.67358e-92	RGCs	CDH12
MBP2	1.23907e-95	0.491577	0.31	0.076	2.96967e-91	RGCs	MBP
NTNG1	1.74021e-95	0.3849	0.151	0.019	4.17075e-91	RGCs	NTNG1
DAAM2	2.27009e-95	0.329665	0.135	0.015	5.44072e-91	RGCs	DAAM2
FAM83A	2.53366e-95	0.377502	0.188	0.03	6.07243e-91	RGCs	FAM83A
PACS1	7.84577e-95	0.513099	0.327	0.085	1.8804e-90	RGCs	PACS1
KCNB11	9.30926e-94	0.516227	0.283	0.066	2.23115e-89	RGCs	KCNB1
SHB	6.02452e-93	0.441352	0.239	0.049	1.4439e-88	RGCs	SHB
ACVR2B	1.23076e-92	0.608834	0.42	0.135	2.94976e-88	RGCs	ACVR2B
DPYSL42	5.24629e-90	0.529049	0.41	0.128	1.25738e-85	RGCs	DPYSL4
SH2D3C1	6.1797e-90	0.522476	0.285	0.069	1.48109e-85	RGCs	SH2D3C
SULT4A1	1.46525e-89	0.352668	0.163	0.024	3.51177e-85	RGCs	SULT4A1
MARCKSL14	4.57059e-89	0.500255	0.953	0.741	1.09543e-84	RGCs	MARCKSL1
RBFOX24	5.61431e-89	0.555369	0.539	0.207	1.34558e-84	RGCs	RBFOX2
KCNH23	1.90467e-88	0.593759	0.477	0.169	4.56493e-84	RGCs	KCNH2
SIPA1L2	3.88833e-88	0.440891	0.234	0.049	9.31917e-84	RGCs	SIPA1L2
JUND4	5.1948e-88	0.559174	0.861	0.549	1.24504e-83	RGCs	JUND
HUNK1	3.65918e-87	0.687722	0.399	0.134	8.76995e-83	RGCs	HUNK
CLVS23	4.38986e-87	0.603198	0.639	0.288	1.05212e-82	RGCs	CLVS2
HSPA12A3	6.74812e-87	0.608321	0.532	0.212	1.61732e-82	RGCs	HSPA12A
CELF63	2.55775e-86	0.571156	0.515	0.195	6.13017e-82	RGCs	CELF6
NEO13	1.09734e-85	0.562965	0.733	0.37	2.62999e-81	RGCs	NEO1
CALM13	4.48401e-85	0.526799	0.946	0.814	1.07468e-80	RGCs	CALM1
IGDCC4	2.12261e-84	0.392795	0.222	0.046	5.08726e-80	RGCs	IGDCC4
GSE13	2.15854e-84	0.572772	0.802	0.465	5.17337e-80	RGCs	GSE1
KCNQ3	2.35951e-84	0.275614	0.112	0.011	5.65503e-80	RGCs	KCNQ3
LOC1017508631	6.90154e-84	0.484553	0.261	0.063	1.65409e-79	RGCs	LOC101750863
CSDC23	1.33045e-83	0.491785	0.399	0.127	3.18868e-79	RGCs	CSDC2
LOC112530161	2.32496e-83	0.405965	0.263	0.062	5.57223e-79	RGCs	LOC112530161
ARFGEF3	4.02126e-83	0.37618	0.201	0.038	9.63776e-79	RGCs	ARFGEF3
ZFHX44	6.23794e-83	0.427935	0.415	0.133	1.49505e-78	RGCs	ZFHX4
C4H20ORF194	1.17644e-82	0.60649	0.612	0.281	2.81959e-78	RGCs	C4H20ORF194
IFI35	1.90087e-81	0.315396	0.127	0.016	4.55581e-77	RGCs	IFI35
DBN13	9.06668e-81	0.530904	0.54	0.22	2.17301e-76	RGCs	DBN1
SUSD63	6.15841e-80	0.603347	0.457	0.175	1.47598e-75	RGCs	SUSD6
PALM3	1.18241e-79	0.55503	0.511	0.205	2.83388e-75	RGCs	PALM
STMN12	1.56014e-79	0.321544	0.997	0.986	3.73919e-75	RGCs	STMN1
PDZRN3	4.04141e-79	0.473232	0.229	0.053	9.68606e-75	RGCs	PDZRN3
SHF2	5.62111e-79	0.526836	0.422	0.148	1.34721e-74	RGCs	SHF
NEFL2	1.12016e-78	0.616078	0.439	0.163	2.68468e-74	RGCs	NEFL
BTBD173	2.9367e-78	0.649537	0.544	0.235	7.03839e-74	RGCs	BTBD17
2019-09-05	5.61347e-78	0.500194	0.322	0.095	1.34538e-73	RGCs	2019-09-05
TNIK2	6.83155e-78	0.561376	0.515	0.209	1.63732e-73	RGCs	TNIK
NKAIN42	4.96866e-77	0.496541	0.376	0.124	1.19084e-72	RGCs	NKAIN4
RPIA	4.98727e-77	0.447557	0.286	0.078	1.1953e-72	RGCs	RPIA
TTYH22	8.04115e-77	0.552506	0.748	0.405	1.92722e-72	RGCs	TTYH2
SYNJ2BP3	1.01106e-76	0.549325	0.43	0.158	2.42321e-72	RGCs	SYNJ2BP
SLCO5A14	1.95956e-75	0.521146	0.434	0.157	4.69649e-71	RGCs	SLCO5A1
MAP3K1	5.64293e-75	0.316019	0.163	0.028	1.35244e-70	RGCs	MAP3K1
KIAA11072	4.12775e-74	0.499385	0.541	0.224	9.89298e-70	RGCs	KIAA1107
CDKN1C3	4.46415e-74	0.51353	0.913	0.631	1.06992e-69	RGCs	CDKN1C
XKR7	7.12256e-74	0.2949	0.154	0.026	1.70706e-69	RGCs	XKR7
RPS6KA1L	8.12723e-74	0.374238	0.24	0.059	1.94785e-69	RGCs	RPS6KA1L
PPP3CA3	2.34981e-73	0.546114	0.532	0.23	5.6318e-69	RGCs	PPP3CA
LOC107054677	1.68362e-72	0.503445	0.217	0.051	4.03513e-68	RGCs	LOC107054677
TUBB2	5.05459e-72	0.443319	0.954	0.798	1.21143e-67	RGCs	TUBB
COX6A14	5.30453e-72	0.357188	0.989	0.938	1.27134e-67	RGCs	COX6A1
TMEM63C2	9.00399e-72	0.486988	0.352	0.114	2.15799e-67	RGCs	TMEM63C
MRPS28	4.01671e-70	0.570169	0.568	0.265	9.62686e-66	RGCs	MRPS28
KCNK10	2.03785e-69	0.282363	0.146	0.024	4.88412e-65	RGCs	KCNK10
DHRS11	3.13528e-68	0.493531	0.384	0.139	7.51432e-64	RGCs	DHRS11
LOC1070508792	3.17088e-67	0.374468	0.255	0.069	7.59965e-63	RGCs	LOC107050879
SOCS4	7.58499e-67	0.315331	0.143	0.025	1.81789e-62	RGCs	SOCS4
ACAP33	8.74023e-67	0.570141	0.524	0.232	2.09477e-62	RGCs	ACAP3
MACF12	1.01705e-66	0.5299	0.656	0.351	2.43757e-62	RGCs	MACF1
ANXA6	1.45256e-66	0.289463	0.113	0.015	3.48136e-62	RGCs	ANXA6
CAMK1D2	1.58735e-66	0.441538	0.402	0.146	3.80439e-62	RGCs	CAMK1D
SLC43A32	1.68157e-66	0.468687	0.384	0.137	4.03021e-62	RGCs	SLC43A3
SOX114	1.75339e-65	0.478277	0.854	0.598	4.20234e-61	RGCs	SOX11
PLEKHO2	2.21104e-65	0.268288	0.125	0.019	5.29919e-61	RGCs	PLEKHO2
PRDM83	2.80367e-65	0.514453	0.327	0.108	6.71957e-61	RGCs	PRDM8
CTIF1	1.15656e-64	0.484089	0.472	0.194	2.77193e-60	RGCs	CTIF
FAM20C	1.18313e-64	0.33095	0.155	0.03	2.8356e-60	RGCs	FAM20C
LOC771811	4.37723e-64	0.333335	0.166	0.034	1.04909e-59	RGCs	LOC771811
FAM163A2	4.52146e-64	0.423913	0.294	0.091	1.08366e-59	RGCs	FAM163A
ADGRV1	6.0267e-64	0.318416	0.193	0.044	1.44442e-59	RGCs	ADGRV1
MAPK8IP1	6.1329e-64	0.344003	0.202	0.048	1.46987e-59	RGCs	MAPK8IP1
LOC101750475	8.23825e-64	0.314336	0.164	0.033	1.97446e-59	RGCs	LOC101750475
PTMA	9.93092e-64	0.252259	1	0.994	2.38014e-59	RGCs	PTMA
RTN4RL23	1.77266e-63	0.500322	0.373	0.138	4.24854e-59	RGCs	RTN4RL2
SLC38A1	1.87597e-63	0.528545	0.724	0.426	4.49614e-59	RGCs	SLC38A1
ZDHHC20	2.49004e-63	0.369867	0.237	0.064	5.96787e-59	RGCs	ZDHHC20
PDE6G	6.63984e-63	0.418561	0.146	0.027	1.59137e-58	RGCs	PDE6G
EXOC6B	2.70928e-62	0.296336	0.17	0.036	6.49333e-58	RGCs	EXOC6B
UBTD2	4.72148e-62	0.297348	0.155	0.031	1.1316e-57	RGCs	UBTD2
PXYLP14	1.30979e-61	0.42284	0.394	0.148	3.13918e-57	RGCs	PXYLP1
STMN42	2.00069e-61	0.38207	0.242	0.067	4.79506e-57	RGCs	STMN4
TBC1D30	5.03573e-61	0.322227	0.189	0.044	1.20691e-56	RGCs	TBC1D30
LOC107054744	2.05153e-60	0.267166	0.124	0.02	4.9169e-56	RGCs	LOC107054744
KIAA0930	2.57195e-60	0.285234	0.171	0.037	6.16418e-56	RGCs	KIAA0930
KCTD7	5.14448e-60	0.312866	0.192	0.046	1.23298e-55	RGCs	KCTD7
TMEM243	7.19174e-60	0.272751	0.131	0.023	1.72364e-55	RGCs	TMEM243
RHOU	7.79135e-60	0.25865	0.125	0.021	1.86735e-55	RGCs	RHOU
LOC107051594	2.94421e-59	0.327681	0.201	0.05	7.0564e-55	RGCs	LOC107051594
BCAR13	3.01428e-59	0.454702	0.466	0.201	7.22431e-55	RGCs	BCAR1
SATB2	4.52636e-59	0.269575	0.117	0.019	1.08483e-54	RGCs	SATB2
SPTAN11	6.791e-59	0.506432	0.581	0.298	1.6276e-54	RGCs	SPTAN1
NPR2	1.13112e-58	0.275217	0.146	0.028	2.71097e-54	RGCs	NPR2
TTC91	3.65454e-58	0.371785	0.28	0.088	8.75883e-54	RGCs	TTC9
MRPL542	4.54529e-58	0.453706	0.855	0.626	1.08937e-53	RGCs	MRPL54
KIF21B3	5.59753e-58	0.394065	0.381	0.142	1.34156e-53	RGCs	KIF21B
DPF3	6.04938e-58	0.391298	0.212	0.056	1.44986e-53	RGCs	DPF3
PIP4K2B	7.09521e-58	0.407017	0.364	0.135	1.70051e-53	RGCs	PIP4K2B
CLMP3	8.33209e-58	0.355189	0.31	0.103	1.99695e-53	RGCs	CLMP
RACGAP1L1	9.34975e-58	0.452968	0.21	0.056	2.24085e-53	RGCs	RACGAP1L
GLUL	4.39429e-57	0.291521	0.175	0.04	1.05318e-52	RGCs	GLUL
TUBB2A4	9.07606e-57	0.465248	0.463	0.203	2.17526e-52	RGCs	TUBB2A
ANKRD13B	1.38947e-56	0.344914	0.221	0.061	3.33014e-52	RGCs	ANKRD13B
GPR137C	1.52211e-56	0.371156	0.265	0.083	3.64805e-52	RGCs	GPR137C
MGAT3	6.9656e-56	0.384216	0.3	0.101	1.66944e-51	RGCs	MGAT3
NTRK32	7.73967e-56	0.394501	0.237	0.07	1.85497e-51	RGCs	NTRK3
CHRNA71	8.25672e-56	0.360657	0.192	0.049	1.97889e-51	RGCs	CHRNA7
ACTG12	1.81599e-55	0.513057	0.774	0.527	4.35239e-51	RGCs	ACTG1
TMEM151B2	1.89655e-55	0.415746	0.235	0.07	4.54545e-51	RGCs	TMEM151B
PHLDA12	3.37935e-55	0.758104	0.553	0.32	8.09928e-51	RGCs	PHLDA1
RBPMS	4.05029e-55	0.420411	0.227	0.067	9.70732e-51	RGCs	RBPMS
FOXD11	4.36281e-55	0.513565	0.281	0.096	1.04564e-50	RGCs	FOXD1
EMILIN3	9.60686e-55	0.41606	0.214	0.06	2.30248e-50	RGCs	EMILIN3
EXOG	1.03357e-54	0.424895	0.392	0.158	2.47715e-50	RGCs	EXOG
NIPA1	1.76718e-54	0.341005	0.26	0.081	4.2354e-50	RGCs	NIPA1
RAB3IP	2.72854e-54	0.371948	0.313	0.11	6.53949e-50	RGCs	RAB3IP
C1QTNF42	2.84878e-54	0.387067	0.264	0.085	6.82767e-50	RGCs	C1QTNF4
MAPK103	6.16523e-54	0.364964	0.307	0.106	1.47762e-49	RGCs	MAPK10
PLCL1	6.62423e-54	0.34113	0.181	0.045	1.58763e-49	RGCs	PLCL1
TNFRSF144	8.76544e-54	0.377336	0.342	0.125	2.10081e-49	RGCs	TNFRSF14
NCAN3	1.42244e-53	0.422158	0.31	0.11	3.40917e-49	RGCs	NCAN
MYC	1.63402e-53	0.346787	0.205	0.056	3.91626e-49	RGCs	MYC
VWA5B2	2.00098e-53	0.310631	0.171	0.041	4.79575e-49	RGCs	VWA5B2
GDI22	2.42424e-53	0.471854	0.729	0.465	5.81019e-49	RGCs	GDI2
LINGO11	4.82376e-53	0.392373	0.263	0.085	1.15611e-48	RGCs	LINGO1
GRIN2B1	2.9955e-52	0.268262	0.201	0.054	7.17931e-48	RGCs	GRIN2B
COX8A	4.06558e-52	0.323099	0.972	0.886	9.74398e-48	RGCs	COX8A
GPC1	7.14623e-52	0.446233	0.455	0.206	1.71274e-47	RGCs	GPC1
APOA1	7.66523e-52	0.616184	0.163	0.04	1.83712e-47	RGCs	APOA1
PHACTR31	1.03963e-51	0.353415	0.28	0.094	2.49169e-47	RGCs	PHACTR3
DYNC1H12	1.08403e-51	0.448109	0.767	0.51	2.5981e-47	RGCs	DYNC1H1
ZBTB202	1.10206e-51	0.488827	0.625	0.348	2.64132e-47	RGCs	ZBTB20
EPB413	1.47573e-51	0.416585	0.803	0.51	3.53688e-47	RGCs	EPB41
JPT12	1.71914e-51	0.408065	0.858	0.631	4.12026e-47	RGCs	JPT1
LOC1017506691	2.02177e-51	0.456498	0.206	0.059	4.84557e-47	RGCs	LOC101750669
PIM3	3.65204e-51	0.448505	0.414	0.178	8.75284e-47	RGCs	PIM3
HIP12	4.07701e-51	0.478616	0.428	0.19	9.77136e-47	RGCs	HIP1
SRSF52	6.34175e-51	0.441662	0.675	0.393	1.51993e-46	RGCs	SRSF5
ADGRL3	7.02166e-51	0.449475	0.653	0.373	1.68288e-46	RGCs	ADGRL3
ANKRD50	7.90565e-51	0.355807	0.191	0.052	1.89475e-46	RGCs	ANKRD50
SCG53	1.71655e-50	0.352831	0.346	0.132	4.11407e-46	RGCs	SCG5
CAMSAP1	1.8943e-50	0.2924	0.2	0.055	4.54006e-46	RGCs	CAMSAP1
ROBO23	2.71239e-50	0.418546	0.691	0.405	6.50078e-46	RGCs	ROBO2
CPEB2	3.32411e-50	0.267031	0.151	0.034	7.9669e-46	RGCs	CPEB2
ABRACL2	3.34472e-50	0.409451	0.466	0.213	8.01629e-46	RGCs	ABRACL
C5H14orf42	4.89489e-50	0.493453	0.686	0.431	1.17316e-45	RGCs	C5H14orf4
DCXR	9.7773e-50	0.329894	0.247	0.079	2.34333e-45	RGCs	DCXR
ATPIF11	2.53597e-49	0.318229	0.963	0.887	6.07796e-45	RGCs	ATPIF1
HS6ST1	5.77533e-49	0.285095	0.18	0.048	1.38417e-44	RGCs	HS6ST1
SEMA6B1	6.34442e-49	0.317694	0.193	0.054	1.52057e-44	RGCs	SEMA6B
AHR	9.43231e-49	0.315394	0.185	0.05	2.26064e-44	RGCs	AHR
SYT43	9.78228e-49	0.291449	0.33	0.124	2.34452e-44	RGCs	SYT4
SEMA4B2	1.20879e-48	0.353774	0.355	0.14	2.89711e-44	RGCs	SEMA4B
NDUFB7	1.47856e-48	0.367261	0.912	0.762	3.54367e-44	RGCs	NDUFB7
PRR72	1.51732e-48	0.389701	0.39	0.165	3.63656e-44	RGCs	PRR7
MYO62	1.86856e-48	0.440798	0.288	0.107	4.47839e-44	RGCs	MYO6
HMX12	2.13902e-48	0.599021	0.499	0.27	5.12658e-44	RGCs	HMX1
SLC45A33	2.65444e-48	0.428063	0.327	0.13	6.36189e-44	RGCs	SLC45A3
PRKCA	2.74425e-48	0.266475	0.133	0.029	6.57715e-44	RGCs	PRKCA
DYNLL2	3.54594e-48	0.383143	0.289	0.105	8.49855e-44	RGCs	DYNLL2
DCLK1	3.7645e-48	0.310806	0.221	0.067	9.02239e-44	RGCs	DCLK1
ATP5L	4.17864e-48	0.32694	0.954	0.85	1.0015e-43	RGCs	ATP5L
CASP3	5.6343e-48	0.40927	0.28	0.102	1.35037e-43	RGCs	CASP3
IGSF21	6.06266e-48	0.41149	0.288	0.105	1.45304e-43	RGCs	IGSF21
DRP2	6.82159e-48	0.251115	0.162	0.04	1.63493e-43	RGCs	DRP2
CASKIN13	1.22578e-47	0.365839	0.298	0.11	2.93782e-43	RGCs	CASKIN1
CORO1C1	1.41617e-47	0.414239	0.464	0.219	3.39414e-43	RGCs	CORO1C
SH3BGRL34	2.05004e-47	0.373838	0.478	0.226	4.91332e-43	RGCs	SH3BGRL3
ADD23	2.11243e-47	0.388593	0.439	0.195	5.06287e-43	RGCs	ADD2
SP4	3.7991e-47	0.470647	0.449	0.215	9.10531e-43	RGCs	SP4
CADM13	4.61448e-47	0.49609	0.787	0.554	1.10595e-42	RGCs	CADM1
PDRG13	4.89552e-47	0.420578	0.54	0.277	1.17331e-42	RGCs	PDRG1
RABGAP1L	8.95642e-47	0.253511	0.155	0.038	2.14658e-42	RGCs	RABGAP1L
ADAM23	9.42205e-47	0.343076	0.208	0.063	2.25818e-42	RGCs	ADAM23
PPDPF4	4.13937e-46	0.380306	0.409	0.18	9.92082e-42	RGCs	PPDPF
AFAP1	4.80905e-46	0.280881	0.173	0.047	1.15258e-41	RGCs	AFAP1
ADK	5.92212e-46	0.36417	0.238	0.08	1.41935e-41	RGCs	ADK
SEMA6A	6.52401e-46	0.318911	0.223	0.071	1.56361e-41	RGCs	SEMA6A
SCHIP1	8.51657e-46	0.36441	0.297	0.112	2.04117e-41	RGCs	SCHIP1
GNG10	9.61358e-46	0.3341	0.229	0.075	2.30409e-41	RGCs	GNG10
SOHO-11	1.72671e-45	0.38649	0.314	0.125	4.13841e-41	RGCs	SOHO-1
WDR47	8.92827e-45	0.307684	0.227	0.074	2.13984e-40	RGCs	WDR47
CDK14	9.14812e-45	0.27153	0.156	0.04	2.19253e-40	RGCs	CDK14
TRUB1	1.25057e-44	0.366591	0.317	0.126	2.99724e-40	RGCs	TRUB1
FBRSL13	1.5883e-44	0.387266	0.564	0.297	3.80669e-40	RGCs	FBRSL1
KLC13	1.81748e-44	0.357076	0.537	0.274	4.35596e-40	RGCs	KLC1
IMPAD1	2.14502e-44	0.374586	0.413	0.184	5.14097e-40	RGCs	IMPAD1
SSBP3	2.14857e-44	0.376909	0.808	0.561	5.14948e-40	RGCs	SSBP3
1944-03-01	4.00246e-44	0.296785	0.401	0.171	9.5927e-40	RGCs	2019-03-04
ARL8BL	4.46573e-44	0.373186	0.279	0.105	1.0703e-39	RGCs	ARL8BL
DYNLT1	4.7504e-44	0.424675	0.668	0.402	1.13853e-39	RGCs	DYNLT1
PAK1	5.33214e-44	0.326406	0.216	0.07	1.27795e-39	RGCs	PAK1
C5H14orf373	8.44785e-44	0.330641	0.332	0.133	2.0247e-39	RGCs	C5H14orf37
DCBLD24	8.9192e-44	0.480195	0.512	0.268	2.13767e-39	RGCs	DCBLD2
PRUNE2	1.07311e-43	0.287543	0.155	0.041	2.57192e-39	RGCs	PRUNE2
HSP90AB11	1.35048e-43	0.359626	0.76	0.486	3.23669e-39	RGCs	HSP90AB1
KLHL91	1.65275e-43	0.329875	0.277	0.103	3.96114e-39	RGCs	KLHL9
DYRK21	1.99923e-43	0.348046	0.285	0.109	4.79156e-39	RGCs	DYRK2
BBIP11	3.44989e-43	0.302357	0.225	0.074	8.26835e-39	RGCs	BBIP1
MAP24	4.6698e-43	0.325697	0.855	0.622	1.11921e-38	RGCs	MAP2
RIMS32	6.77908e-43	0.302474	0.221	0.073	1.62474e-38	RGCs	RIMS3
FOXP4L1	7.44607e-43	0.430698	0.29	0.116	1.7846e-38	RGCs	FOXP4L
1933-09-01	7.4859e-43	0.343506	0.535	0.266	1.79415e-38	RGCs	2019-09-03
CLTB3	1.36551e-42	0.37228	0.662	0.382	3.27271e-38	RGCs	CLTB
ATP5F1B	1.63084e-42	0.292587	0.957	0.85	3.90864e-38	RGCs	ATP5F1B
KLHL362	1.8809e-42	0.36584	0.623	0.35	4.50795e-38	RGCs	KLHL36
APP1	2.89281e-42	0.407159	0.699	0.438	6.9332e-38	RGCs	APP
MDK3	3.05241e-42	0.376794	0.413	0.192	7.31572e-38	RGCs	MDK
RUBCN	4.21707e-42	0.268381	0.177	0.051	1.01071e-37	RGCs	RUBCN
RAX23	4.46243e-42	0.369776	0.378	0.17	1.06951e-37	RGCs	RAX2
SLC35B4	5.76892e-42	0.336528	0.306	0.121	1.38264e-37	RGCs	SLC35B4
ATP11C	9.42651e-42	0.34879	0.254	0.094	2.25925e-37	RGCs	ATP11C
MZT2BL1	2.48666e-41	0.395029	0.482	0.245	5.95978e-37	RGCs	MZT2BL
CELSR33	2.97299e-41	0.37359	0.428	0.202	7.12536e-37	RGCs	CELSR3
CHMP31	4.64637e-41	0.349717	0.413	0.193	1.1136e-36	RGCs	CHMP3
NDST1	5.49532e-41	0.266687	0.226	0.076	1.31706e-36	RGCs	NDST1
ARHGDIG	6.26096e-41	0.251479	0.175	0.051	1.50056e-36	RGCs	ARHGDIG
NKAIN14	8.75317e-41	0.320497	0.31	0.123	2.09787e-36	RGCs	NKAIN1
RAB11B1	1.11908e-40	0.369048	0.495	0.25	2.68209e-36	RGCs	RAB11B
CSRNP14	1.30908e-40	0.339376	0.372	0.164	3.13747e-36	RGCs	CSRNP1
LFNG2	5.14928e-40	0.337899	0.678	0.406	1.23413e-35	RGCs	LFNG
CRYBA43	5.33847e-40	0.373654	0.593	0.321	1.27947e-35	RGCs	CRYBA4
CRELD1	2.27633e-39	0.308554	0.231	0.082	5.45569e-35	RGCs	CRELD1
SETBP13	3.18729e-39	0.384619	0.761	0.527	7.63899e-35	RGCs	SETBP1
THSD7A1	3.63697e-39	0.366224	0.238	0.088	8.71674e-35	RGCs	THSD7A
RUFY33	3.63769e-39	0.351254	0.495	0.256	8.71845e-35	RGCs	RUFY3
CELSR22	5.05824e-39	0.358079	0.519	0.272	1.21231e-34	RGCs	CELSR2
NIPSNAP3L1	6.75513e-39	0.306426	0.247	0.091	1.619e-34	RGCs	NIPSNAP3L
PIN41	9.83793e-39	0.36039	0.635	0.372	2.35786e-34	RGCs	PIN4
TMEM255A3	1.68477e-38	0.310214	0.342	0.144	4.03788e-34	RGCs	TMEM255A
LYRM41	2.25691e-38	0.34513	0.364	0.165	5.40914e-34	RGCs	LYRM4
KIAA0408	2.39985e-38	0.342266	0.329	0.142	5.75171e-34	RGCs	KIAA0408
PKM1	6.70702e-38	0.322849	0.97	0.9	1.60747e-33	RGCs	PKM
GAREM1	9.33128e-38	0.299718	0.163	0.049	2.23643e-33	RGCs	GAREM1
SLIRP1	1.04122e-37	0.341353	0.859	0.679	2.4955e-33	RGCs	SLIRP
PPFIA2	1.10297e-37	0.268876	0.191	0.062	2.64349e-33	RGCs	PPFIA2
DST1	1.18352e-37	0.364621	0.329	0.144	2.83654e-33	RGCs	DST
TTC1	1.97309e-37	0.310037	0.332	0.143	4.7289e-33	RGCs	TTC1
LOC107049545	2.4537e-37	0.356381	0.752	0.544	5.88079e-33	RGCs	LOC107049545
ZNF648	2.68509e-37	0.312298	0.277	0.111	6.43535e-33	RGCs	ZNF648
CUX2	2.7387e-37	0.285644	0.227	0.081	6.56384e-33	RGCs	CUX2
TRAK1	3.05062e-37	0.260166	0.168	0.051	7.31142e-33	RGCs	TRAK1
YWHAB	5.98694e-37	0.349614	0.731	0.478	1.43489e-32	RGCs	YWHAB
AAGAB3	2.83361e-36	0.344459	0.369	0.171	6.79132e-32	RGCs	AAGAB
TSHZ2	4.83734e-36	0.294495	0.167	0.052	1.15937e-31	RGCs	TSHZ2
NFE2L1	5.90066e-36	0.360093	0.409	0.202	1.41421e-31	RGCs	NFE2L1
LCOR1	7.12386e-36	0.355139	0.484	0.258	1.70738e-31	RGCs	LCOR
GNAL	1.57381e-35	0.277257	0.189	0.064	3.77195e-31	RGCs	GNAL
DLGAP4	1.61144e-35	0.297205	0.372	0.172	3.86215e-31	RGCs	DLGAP4
C15H12orf49	1.92699e-35	0.35108	0.344	0.159	4.61842e-31	RGCs	C15H12orf49
HECW2	2.1483e-35	0.289659	0.223	0.083	5.14884e-31	RGCs	HECW2
ELAVL1	2.3338e-35	0.340038	0.773	0.526	5.59342e-31	RGCs	ELAVL1
LOC107056274	2.57744e-35	0.29081	0.318	0.137	6.17735e-31	RGCs	LOC107056274
PIK3IP13	2.74691e-35	0.326223	0.384	0.182	6.58351e-31	RGCs	PIK3IP1
FEZ13	2.91388e-35	0.317498	0.378	0.178	6.9837e-31	RGCs	FEZ1
TPMT1	3.47221e-35	0.304823	0.276	0.114	8.32186e-31	RGCs	TPMT
RBPJ3	4.56099e-35	0.306642	0.292	0.124	1.09313e-30	RGCs	RBPJ
DYNC1I2	4.59354e-35	0.352868	0.428	0.218	1.10093e-30	RGCs	DYNC1I2
ANK21	4.90055e-35	0.398844	0.378	0.186	1.17451e-30	RGCs	ANK2
PRKAR2A	5.08965e-35	0.355175	0.335	0.153	1.21984e-30	RGCs	PRKAR2A
CCDC1772	7.122e-35	0.263927	0.229	0.085	1.70693e-30	RGCs	CCDC177
ACTR31	7.48604e-35	0.348239	0.503	0.273	1.79418e-30	RGCs	ACTR3
SMIM203	1.02852e-34	0.351408	0.644	0.38	2.46505e-30	RGCs	SMIM20
SYT12	1.43875e-34	0.316804	0.254	0.101	3.44824e-30	RGCs	SYT1
DACH12	1.75689e-34	0.335983	0.385	0.185	4.21075e-30	RGCs	DACH1
CADM24	1.80608e-34	0.310164	0.439	0.218	4.32864e-30	RGCs	CADM2
2019-06-01	2.22337e-34	0.318134	0.336	0.154	5.32876e-30	RGCs	JUN
KAT6B	2.42133e-34	0.290884	0.235	0.09	5.80321e-30	RGCs	KAT6B
GRIPAP12	2.66757e-34	0.344438	0.285	0.122	6.39337e-30	RGCs	GRIPAP1
RAB1B	3.29124e-34	0.379483	0.687	0.464	7.88812e-30	RGCs	RAB1B
SLC12A91	3.89818e-34	0.356034	0.276	0.117	9.34277e-30	RGCs	SLC12A9
LOC1070523893	4.18103e-34	0.350803	0.816	0.627	1.00207e-29	RGCs	LOC107052389
CDK11A	4.63628e-34	0.348447	0.54	0.304	1.11118e-29	RGCs	CDK11A
MEX3A3	5.91321e-34	0.265857	0.945	0.813	1.41722e-29	RGCs	MEX3A
NR2C2AP	6.61811e-34	0.254776	0.192	0.066	1.58616e-29	RGCs	NR2C2AP
MYO18A2	7.06645e-34	0.281989	0.311	0.136	1.69362e-29	RGCs	MYO18A
PFDN1	7.31789e-34	0.353609	0.528	0.302	1.75388e-29	RGCs	PFDN1
NSMF	8.23213e-34	0.280306	0.139	0.041	1.97299e-29	RGCs	NSMF
HECTD41	8.50152e-34	0.293932	0.29	0.124	2.03756e-29	RGCs	HECTD4
SEC61G1	9.18714e-34	0.368166	0.783	0.588	2.20188e-29	RGCs	SEC61G
NOL41	1.0606e-33	0.307795	0.327	0.147	2.54193e-29	RGCs	NOL4
SMUG13	1.1185e-33	0.330988	0.346	0.161	2.6807e-29	RGCs	SMUG1
TMCC1	3.54467e-33	0.259743	0.18	0.061	8.4955e-29	RGCs	TMCC1
AMFR	4.19883e-33	0.292566	0.246	0.098	1.00633e-28	RGCs	AMFR
SRXN13	4.27726e-33	0.304401	0.286	0.122	1.02513e-28	RGCs	SRXN1
LOC1125309301	5.39042e-33	0.255512	0.221	0.083	1.29192e-28	RGCs	LOC112530930
ACTC11	5.77299e-33	0.335154	0.116	0.03	1.38361e-28	RGCs	ACTC1
AKAP123	6.64687e-33	0.345554	0.544	0.314	1.59306e-28	RGCs	AKAP12
RABGAP1	6.70855e-33	0.326048	0.384	0.19	1.60784e-28	RGCs	RABGAP1
MDH21	7.87319e-33	0.348431	0.569	0.338	1.88697e-28	RGCs	MDH2
PARD3B	1.3942e-32	0.313661	0.327	0.151	3.34148e-28	RGCs	PARD3B
HERC1	1.41821e-32	0.315636	0.323	0.15	3.39904e-28	RGCs	HERC1
ZHX2	1.55012e-32	0.251603	0.171	0.057	3.71518e-28	RGCs	ZHX2
CACNG52	3.32362e-32	0.267515	0.277	0.117	7.96572e-28	RGCs	CACNG5
NEDD81	3.78967e-32	0.305331	0.585	0.339	9.08269e-28	RGCs	NEDD8
SARS3	3.92224e-32	0.333136	0.735	0.507	9.40044e-28	RGCs	SARS
SDHAF2	4.8369e-32	0.320437	0.557	0.323	1.15926e-27	RGCs	SDHAF2
LOC4228944	6.31186e-32	0.296986	0.343	0.159	1.51276e-27	RGCs	LOC422894
KLF10	8.23658e-32	0.332977	0.386	0.196	1.97406e-27	RGCs	KLF10
S100A101	1.00079e-31	0.399567	0.283	0.128	2.3986e-27	RGCs	S100A10
LRCH21	1.64687e-31	0.32503	0.398	0.203	3.94706e-27	RGCs	LRCH2
OLFML2B	2.28312e-31	0.279368	0.188	0.068	5.47195e-27	RGCs	OLFML2B
KIDINS2202	4.40403e-31	0.310992	0.537	0.309	1.05551e-26	RGCs	KIDINS220
ARL8A	5.27202e-31	0.284064	0.276	0.12	1.26355e-26	RGCs	ARL8A
CHMP4B	5.51868e-31	0.325614	0.536	0.316	1.32266e-26	RGCs	CHMP4B
RHOB	1.18436e-30	0.265007	0.206	0.079	2.83856e-26	RGCs	RHOB
MAST31	1.33516e-30	0.252049	0.185	0.066	3.19998e-26	RGCs	MAST3
DDIT33	1.38624e-30	0.484505	0.49	0.281	3.32239e-26	RGCs	DDIT3
CDCA7L2	1.40101e-30	0.33344	0.385	0.198	3.3578e-26	RGCs	CDCA7L
ARPC4-TTLL31	1.58169e-30	0.313167	0.401	0.206	3.79083e-26	RGCs	ARPC4-TTLL3
KIFAP31	1.90281e-30	0.326573	0.426	0.227	4.56047e-26	RGCs	KIFAP3
PFN21	2.49072e-30	0.329724	0.715	0.503	5.96951e-26	RGCs	PFN2
SPAST	2.65292e-30	0.317581	0.42	0.22	6.35826e-26	RGCs	SPAST
TCF124	3.29561e-30	0.336216	0.725	0.525	7.89859e-26	RGCs	TCF12
KCTD2	3.80112e-30	0.320062	0.36	0.18	9.11015e-26	RGCs	KCTD2
DIS3L2	7.45396e-30	0.297493	0.191	0.072	1.78649e-25	RGCs	DIS3L2
ZYX	8.11601e-30	0.277233	0.205	0.079	1.94516e-25	RGCs	ZYX
NDUFV23	8.70019e-30	0.333568	0.516	0.305	2.08517e-25	RGCs	NDUFV2
B4GALT21	9.19971e-30	0.306321	0.347	0.171	2.20489e-25	RGCs	B4GALT2
SHROOM2	3.17124e-29	0.251925	0.222	0.089	7.60051e-25	RGCs	SHROOM2
NTM2	3.3563e-29	0.365345	0.43	0.234	8.04405e-25	RGCs	NTM
MMP15	3.40206e-29	0.310072	0.498	0.285	8.15371e-25	RGCs	MMP15
APC1	3.79911e-29	0.313339	0.407	0.214	9.10534e-25	RGCs	APC
CFL21	1.28394e-28	0.312681	0.683	0.474	3.07722e-24	RGCs	CFL2
FYN1	2.0966e-28	0.299497	0.384	0.199	5.02493e-24	RGCs	FYN
EDIL33	2.34417e-28	0.260088	0.305	0.142	5.61827e-24	RGCs	EDIL3
COMMD1	2.5374e-28	0.289211	0.321	0.155	6.08138e-24	RGCs	COMMD1
SKI1	2.76441e-28	0.277821	0.304	0.143	6.62545e-24	RGCs	SKI
LOC1017505133	2.86114e-28	0.270229	0.226	0.094	6.85729e-24	RGCs	LOC101750513
HK13	3.74748e-28	0.295563	0.468	0.258	8.98159e-24	RGCs	HK1
SAMD141	4.62521e-28	0.254494	0.271	0.12	1.10852e-23	RGCs	SAMD14
RAPGEF6	5.7348e-28	0.268243	0.231	0.098	1.37446e-23	RGCs	RAPGEF6
YWHAZ	9.63531e-28	0.292998	0.757	0.542	2.30929e-23	RGCs	YWHAZ
ATP1A1	1.06433e-27	0.292214	0.279	0.129	2.55089e-23	RGCs	ATP1A1
IPO13	1.45384e-27	0.261775	0.219	0.091	3.48443e-23	RGCs	IPO13
IMMP1L3	1.7364e-27	0.28293	0.336	0.164	4.16163e-23	RGCs	IMMP1L
BZW21	1.80613e-27	0.287064	0.608	0.378	4.32876e-23	RGCs	BZW2
SH3BP5	2.32623e-27	0.250679	0.297	0.139	5.57528e-23	RGCs	SH3BP5
ITGA6	3.12764e-27	0.263687	0.156	0.056	7.49602e-23	RGCs	ITGA6
KIAA15221	4.03343e-27	0.273672	0.235	0.101	9.66692e-23	RGCs	KIAA1522
ACOT71	4.1173e-27	0.296559	0.292	0.139	9.86793e-23	RGCs	ACOT7
SLC25A14	4.37896e-27	0.29423	0.35	0.179	1.04951e-22	RGCs	SLC25A14
MBNL33	6.60827e-27	0.257872	0.394	0.208	1.5838e-22	RGCs	MBNL3
SACS	9.94672e-27	0.267639	0.235	0.103	2.38393e-22	RGCs	SACS
ZNF4231	1.96399e-26	0.320666	0.611	0.405	4.70711e-22	RGCs	ZNF423
LOC1070542043	2.12852e-26	0.37561	0.297	0.15	5.10142e-22	RGCs	LOC107054204
KIAA20221	2.94981e-26	0.276556	0.434	0.237	7.06981e-22	RGCs	KIAA2022
MMP17	2.97694e-26	0.288342	0.185	0.074	7.13482e-22	RGCs	MMP17
REXO2	3.8157e-26	0.298604	0.445	0.253	9.14508e-22	RGCs	REXO2
MAP1LC3B	4.02081e-26	0.273532	0.386	0.205	9.63667e-22	RGCs	MAP1LC3B
LAMTOR5	4.45416e-26	0.290891	0.415	0.228	1.06753e-21	RGCs	LAMTOR5
NTMT1	5.53758e-26	0.262954	0.364	0.189	1.32719e-21	RGCs	NTMT1
DAB2IP1	6.54887e-26	0.281592	0.548	0.332	1.56957e-21	RGCs	DAB2IP
NDUFA121	1.12968e-25	0.368068	0.48	0.295	2.70751e-21	RGCs	NDUFA12
IDH1	1.22429e-25	0.276435	0.326	0.163	2.93426e-21	RGCs	IDH1
RTN43	1.53867e-25	0.265745	0.8	0.619	3.68773e-21	RGCs	RTN4
DNMT3A3	1.73658e-25	0.281087	0.72	0.519	4.16205e-21	RGCs	DNMT3A
YWHAE	1.76364e-25	0.26569	0.844	0.68	4.22691e-21	RGCs	YWHAE
VAPB	1.87298e-25	0.300279	0.551	0.348	4.48896e-21	RGCs	VAPB
SERINC12	1.90679e-25	0.260248	0.807	0.611	4.57e-21	RGCs	SERINC1
LOC1125328901	2.06818e-25	0.274471	0.46	0.261	4.9568e-21	RGCs	LOC112532890
CDC42	2.66982e-25	0.282385	0.65	0.429	6.39877e-21	RGCs	CDC42
TAF15	3.78508e-25	0.263697	0.427	0.239	9.07171e-21	RGCs	TAF15
NCS13	4.40307e-25	0.286968	0.444	0.251	1.05528e-20	RGCs	NCS1
POLR1D	4.79667e-25	0.274446	0.285	0.139	1.14962e-20	RGCs	POLR1D
ARPC2	6.37017e-25	0.263812	0.42	0.232	1.52674e-20	RGCs	ARPC2
RPE1	7.40609e-25	0.266875	0.393	0.21	1.77502e-20	RGCs	RPE
GNB4	7.66969e-25	0.264362	0.384	0.206	1.83819e-20	RGCs	GNB4
AP2B1	7.86425e-25	0.283153	0.51	0.307	1.88483e-20	RGCs	AP2B1
RNF442	1.53323e-24	0.267769	0.681	0.452	3.6747e-20	RGCs	RNF44
C14H16orf451	3.42776e-24	0.25026	0.326	0.166	8.21531e-20	RGCs	C14H16orf45
MYL61	6.24849e-24	0.302538	0.522	0.325	1.49758e-19	RGCs	MYL6
HDGFRP31	8.70465e-24	0.250125	0.455	0.257	2.08624e-19	RGCs	HDGFRP3
C1QBP	1.16396e-23	0.262665	0.451	0.261	2.78966e-19	RGCs	C1QBP
MGARP1	1.17618e-23	0.31711	0.762	0.577	2.81894e-19	RGCs	MGARP
IMPDH2	1.94042e-23	0.260673	0.381	0.211	4.65062e-19	RGCs	IMPDH2
ZNRF1	2.88716e-23	0.256828	0.488	0.289	6.91966e-19	RGCs	ZNRF1
BAHCC12	3.55518e-23	0.286573	0.553	0.348	8.52069e-19	RGCs	BAHCC1
ARPC1A	4.06275e-23	0.257572	0.456	0.27	9.73718e-19	RGCs	ARPC1A
RAB3A1	4.69107e-23	0.269362	0.365	0.2	1.12431e-18	RGCs	RAB3A
GNAI21	7.50252e-23	0.256265	0.315	0.163	1.79813e-18	RGCs	GNAI2
NDUFB1	2.30719e-22	0.287796	0.769	0.614	5.52963e-18	RGCs	NDUFB1
UCHL3	3.3263e-22	0.25502	0.33	0.177	7.97214e-18	RGCs	UCHL3
EPHB11	6.2918e-22	0.250028	0.267	0.133	1.50796e-17	RGCs	EPHB1
MAPK1	1.85409e-21	0.280205	0.531	0.34	4.44371e-17	RGCs	MAPK1
CCT4	2.18827e-21	0.272645	0.541	0.346	5.24463e-17	RGCs	CCT4
LOC107056412	3.03156e-21	0.250859	0.413	0.236	7.26573e-17	RGCs	LOC107056412
NDUFB91	4.21311e-21	0.265299	0.57	0.364	1.00976e-16	RGCs	NDUFB9
PHC22	5.24648e-21	0.274016	0.69	0.5	1.25742e-16	RGCs	PHC2
PSMD2	6.40644e-21	0.253844	0.381	0.215	1.53543e-16	RGCs	PSMD2
PRPS11	1.057e-20	0.253694	0.47	0.291	2.53331e-16	RGCs	PRPS1
CCT5	1.28206e-20	0.264501	0.526	0.337	3.07272e-16	RGCs	CCT5
MPC2	1.76002e-20	0.277828	0.459	0.285	4.21824e-16	RGCs	MPC2
CHN1	3.58827e-20	0.25743	0.344	0.193	8.60001e-16	RGCs	CHN1
PBDC1	4.71824e-20	0.269577	0.711	0.513	1.13082e-15	RGCs	PBDC1
SPTBN1	1.08276e-19	0.271899	0.643	0.466	2.59505e-15	RGCs	SPTBN1
ELMOD22	9.35785e-19	0.263566	0.447	0.278	2.24279e-14	RGCs	ELMOD2
PSMA5	1.33806e-18	0.250963	0.447	0.28	3.20692e-14	RGCs	PSMA5
GST2L1	2.09657e-18	0.262908	0.61	0.417	5.02485e-14	RGCs	GST2L
AFDN	3.76451e-18	0.261703	0.53	0.356	9.02239e-14	RGCs	AFDN
MARK1	2.90269e-16	0.268848	0.399	0.25	6.95688e-12	RGCs	MARK1

## Sheet: AC.HC.RGC
	p_val	avg_logFC	pct.1	pct.2	p_val_adj	cluster	gene
DLX28	0	1.89718	0.726	0.089	0	ACs/HCs/RGCs	DLX2
HEY19	0	1.73949	0.849	0.15	0	ACs/HCs/RGCs	HEY1
CDKN1C7	3.33161e-188	1.61053	0.968	0.639	7.98487e-184	ACs/HCs/RGCs	CDKN1C
DLX18	1.16559e-174	1.14667	0.531	0.094	2.79356e-170	ACs/HCs/RGCs	DLX1
SLC9A3R15	5.84556e-172	1.41545	0.699	0.187	1.40101e-167	ACs/HCs/RGCs	SLC9A3R1
TTYH37	1.15582e-169	1.47762	0.862	0.333	2.77016e-165	ACs/HCs/RGCs	TTYH3
LFNG7	2.26337e-158	1.66157	0.874	0.408	5.42462e-154	ACs/HCs/RGCs	LFNG
METRN7	3.53668e-155	1.18024	0.521	0.102	8.47635e-151	ACs/HCs/RGCs	METRN
INSM28	2.29487e-125	1.21753	0.889	0.445	5.50013e-121	ACs/HCs/RGCs	INSM2
PTF1A9	3.09815e-91	1.65393	0.368	0.083	7.42535e-87	ACs/HCs/RGCs	PTF1A
CHGB8	4.66413e-69	1.09301	0.625	0.274	1.11785e-64	ACs/HCs/RGCs	CHGB
TNFSF107	2.97915e-63	0.75283	0.578	0.234	7.14013e-59	ACs/HCs/RGCs	TNFSF10
PAX68	8.88738e-60	0.694708	0.862	0.505	2.13004e-55	ACs/HCs/RGCs	PAX6
ELAVL22	8.40447e-58	0.700784	0.358	0.106	2.0143e-53	ACs/HCs/RGCs	ELAVL2
STK38L8	1.86939e-57	0.790287	0.723	0.402	4.48036e-53	ACs/HCs/RGCs	STK38L
HES46	2.18074e-57	0.806206	0.632	0.303	5.22658e-53	ACs/HCs/RGCs	HES4
TMEM161A8	3.00281e-57	0.77679	0.578	0.247	7.19685e-53	ACs/HCs/RGCs	TMEM161A
RPESL	5.40352e-57	0.568948	0.222	0.045	1.29506e-52	ACs/HCs/RGCs	RPESL
ZNRF27	7.22274e-55	0.684161	0.368	0.116	1.73107e-50	ACs/HCs/RGCs	ZNRF2
ITGA61	3.30709e-54	0.549863	0.244	0.056	7.92609e-50	ACs/HCs/RGCs	ITGA6
MRPS282	1.75392e-51	0.706249	0.578	0.276	4.20362e-47	ACs/HCs/RGCs	MRPS28
DAAM16	2.09952e-51	0.671903	0.77	0.469	5.03192e-47	ACs/HCs/RGCs	DAAM1
HES19	1.01995e-50	0.886616	0.481	0.199	2.44452e-46	ACs/HCs/RGCs	HES1
KCNB12	1.95913e-49	0.642291	0.277	0.075	4.69544e-45	ACs/HCs/RGCs	KCNB1
SOX92	7.91517e-49	0.620369	0.286	0.079	1.89703e-44	ACs/HCs/RGCs	SOX9
CSRNP17	2.37651e-47	0.753603	0.437	0.169	5.69578e-43	ACs/HCs/RGCs	CSRNP1
DAB2IP5	2.32668e-46	0.723407	0.63	0.337	5.57636e-42	ACs/HCs/RGCs	DAB2IP
FRAS1	3.17903e-46	0.569156	0.17	0.033	7.61918e-42	ACs/HCs/RGCs	FRAS1
PHLDA24	4.86144e-46	0.787398	0.346	0.114	1.16514e-41	ACs/HCs/RGCs	PHLDA2
FERMT25	1.28461e-45	0.699499	0.637	0.347	3.07883e-41	ACs/HCs/RGCs	FERMT2
EPHB14	1.44039e-42	0.807266	0.358	0.134	3.45219e-38	ACs/HCs/RGCs	EPHB1
LOC1070573639	4.82065e-42	0.519799	0.83	0.504	1.15536e-37	ACs/HCs/RGCs	LOC107057363
EFNB17	6.95328e-42	0.673735	0.556	0.277	1.66649e-37	ACs/HCs/RGCs	EFNB1
DYNC1I15	2.21459e-41	0.725267	0.472	0.212	5.30771e-37	ACs/HCs/RGCs	DYNC1I1
NES6	3.92198e-38	0.534166	0.699	0.404	9.39981e-34	ACs/HCs/RGCs	NES
NOTCH19	1.67986e-36	0.581947	0.775	0.471	4.02612e-32	ACs/HCs/RGCs	NOTCH1
FAM43A5	2.01493e-36	0.647092	0.543	0.285	4.82917e-32	ACs/HCs/RGCs	FAM43A
KCNC4	2.09577e-36	0.440071	0.183	0.044	5.02292e-32	ACs/HCs/RGCs	KCNC4
TPD521	1.77344e-35	0.512187	0.198	0.052	4.2504e-31	ACs/HCs/RGCs	TPD52
LDHA7	1.9137e-34	0.514056	0.894	0.706	4.58656e-30	ACs/HCs/RGCs	LDHA
FADS22	6.05513e-34	0.620768	0.44	0.205	1.45123e-29	ACs/HCs/RGCs	FADS2
HEYL1	8.87064e-33	0.357168	0.133	0.028	2.12603e-28	ACs/HCs/RGCs	HEYL
CLVS11	2.93708e-32	0.341113	0.146	0.033	7.0393e-28	ACs/HCs/RGCs	CLVS1
SHISA21	5.0205e-32	0.626933	0.373	0.159	1.20326e-27	ACs/HCs/RGCs	SHISA2
MMD25	8.37085e-32	0.502772	0.341	0.137	2.00624e-27	ACs/HCs/RGCs	MMD2
FIGNL25	1.11519e-31	0.483122	0.326	0.127	2.67278e-27	ACs/HCs/RGCs	FIGNL2
CKB6	3.09338e-31	0.292741	0.805	0.567	7.41389e-27	ACs/HCs/RGCs	CKB
SLC2A16	6.41349e-31	0.516181	0.588	0.33	1.53712e-26	ACs/HCs/RGCs	SLC2A1
LOC1070542047	4.98936e-30	0.515388	0.358	0.153	1.1958e-25	ACs/HCs/RGCs	LOC107054204
SOX118	8.33722e-30	0.487902	0.827	0.608	1.99818e-25	ACs/HCs/RGCs	SOX11
1994-09-01	4.43242e-29	0.511418	0.336	0.144	1.06232e-24	ACs/HCs/RGCs	2019-09-09
LOC1017478521	5.18346e-29	0.459979	0.185	0.053	1.24232e-24	ACs/HCs/RGCs	LOC101747852
NUBP2	6.69786e-29	0.361358	0.141	0.034	1.60528e-24	ACs/HCs/RGCs	NUBP2
PCMTD2	1.19758e-27	0.441278	0.277	0.106	2.87023e-23	ACs/HCs/RGCs	PCMTD2
NME3	1.97074e-27	0.488	0.262	0.1	4.72326e-23	ACs/HCs/RGCs	NME3
POU4F31	2.51044e-27	0.492788	0.212	0.069	6.01676e-23	ACs/HCs/RGCs	POU4F3
FAM212B1	3.15694e-26	0.417587	0.225	0.078	7.56624e-22	ACs/HCs/RGCs	FAM212B
BPIFB2	3.10417e-25	0.349699	0.121	0.028	7.43976e-21	ACs/HCs/RGCs	BPIFB2
ANKRD113	3.96602e-25	0.571147	0.76	0.61	9.50535e-21	ACs/HCs/RGCs	ANKRD11
BCL11A2	6.75191e-25	0.454355	0.464	0.246	1.61823e-20	ACs/HCs/RGCs	BCL11A
DYNC1I22	1.39259e-24	0.468557	0.432	0.226	3.33762e-20	ACs/HCs/RGCs	DYNC1I2
COL2A16	4.76261e-24	0.372445	0.452	0.229	1.14146e-19	ACs/HCs/RGCs	COL2A1
NRARP9	8.33903e-24	0.443881	0.484	0.259	1.99862e-19	ACs/HCs/RGCs	NRARP
VSTM2A1	1.11642e-23	0.400625	0.16	0.047	2.67573e-19	ACs/HCs/RGCs	VSTM2A
C1QTNF44	1.39549e-23	0.456779	0.24	0.093	3.34458e-19	ACs/HCs/RGCs	C1QTNF4
TNRC185	6.62392e-23	0.503169	0.617	0.428	1.58755e-18	ACs/HCs/RGCs	TNRC18
CTNNAL18	1.74023e-22	0.47962	0.306	0.138	4.17082e-18	ACs/HCs/RGCs	CTNNAL1
PRDM139	5.39396e-22	0.806278	0.267	0.117	1.29277e-17	ACs/HCs/RGCs	PRDM13
OPCML1	7.90195e-22	0.463865	0.153	0.047	1.89386e-17	ACs/HCs/RGCs	OPCML
PALD14	3.81066e-21	0.420078	0.489	0.293	9.13301e-17	ACs/HCs/RGCs	PALD1
SOX133	4.47608e-21	0.387901	0.244	0.099	1.07278e-16	ACs/HCs/RGCs	SOX13
SASH1	8.02503e-21	0.323177	0.143	0.043	1.92336e-16	ACs/HCs/RGCs	SASH1
PARP81	7.51093e-19	0.280588	0.116	0.033	1.80014e-14	ACs/HCs/RGCs	PARP8
AKAP128	1.47851e-18	0.416905	0.519	0.323	3.54353e-14	ACs/HCs/RGCs	AKAP12
ENO14	4.85268e-18	0.300778	0.953	0.914	1.16304e-13	ACs/HCs/RGCs	ENO1
CKMT1A7	5.82593e-18	0.398129	0.373	0.203	1.3963e-13	ACs/HCs/RGCs	CKMT1A
TNIK5	7.02425e-18	0.424687	0.395	0.225	1.6835e-13	ACs/HCs/RGCs	TNIK
CABLES2	1.13301e-17	0.264076	0.106	0.03	2.71548e-13	ACs/HCs/RGCs	CABLES2
DDIT45	1.83477e-17	0.422926	0.775	0.65	4.3974e-13	ACs/HCs/RGCs	DDIT4
KIRREL32	2.15197e-17	0.427223	0.306	0.154	5.15764e-13	ACs/HCs/RGCs	KIRREL3
ITGB51	3.69284e-17	0.283788	0.158	0.057	8.85062e-13	ACs/HCs/RGCs	ITGB5
FAM210B3	3.88425e-17	0.469916	0.242	0.113	9.30939e-13	ACs/HCs/RGCs	FAM210B
STOX24	3.92098e-17	0.464272	0.694	0.546	9.39741e-13	ACs/HCs/RGCs	STOX2
PLK31	5.62366e-17	0.312079	0.158	0.057	1.34782e-12	ACs/HCs/RGCs	PLK3
ARHGAP324	6.02024e-17	0.375916	0.368	0.202	1.44287e-12	ACs/HCs/RGCs	ARHGAP32
RCN1L1	2.16263e-16	0.288942	0.143	0.05	5.18319e-12	ACs/HCs/RGCs	RCN1L
RCC22	2.32289e-16	0.366033	0.57	0.395	5.56728e-12	ACs/HCs/RGCs	RCC2
TP53I114	6.37913e-16	0.343144	0.511	0.323	1.52889e-11	ACs/HCs/RGCs	TP53I11
AHCYL21	7.07023e-16	0.350177	0.242	0.114	1.69452e-11	ACs/HCs/RGCs	AHCYL2
FAT15	1.12025e-15	0.405756	0.348	0.196	2.6849e-11	ACs/HCs/RGCs	FAT1
CITED4	2.93225e-15	0.357228	0.123	0.042	7.02773e-11	ACs/HCs/RGCs	CITED4
TSPAN5	6.49642e-15	0.39996	0.528	0.367	1.557e-10	ACs/HCs/RGCs	TSPAN5
ZFHX49	1.54227e-14	0.283099	0.296	0.149	3.69636e-10	ACs/HCs/RGCs	ZFHX4
BTG15	2.46544e-14	0.264616	0.827	0.693	5.90893e-10	ACs/HCs/RGCs	BTG1
LOC1125333623	3.30658e-14	0.356759	0.222	0.104	7.92488e-10	ACs/HCs/RGCs	LOC112533362
MMP172	4.87022e-14	0.393314	0.18	0.078	1.16724e-09	ACs/HCs/RGCs	MMP17
SLC16A16	5.01112e-14	0.392156	0.244	0.122	1.20102e-09	ACs/HCs/RGCs	SLC16A1
KLHL364	5.53913e-14	0.311928	0.536	0.364	1.32756e-09	ACs/HCs/RGCs	KLHL36
EMILIN31	7.57461e-14	0.269939	0.165	0.068	1.81541e-09	ACs/HCs/RGCs	EMILIN3
ID42	8.28314e-14	0.34784	0.173	0.074	1.98522e-09	ACs/HCs/RGCs	ID4
HMGCS14	1.38782e-13	0.38651	0.449	0.298	3.32618e-09	ACs/HCs/RGCs	HMGCS1
MIR1723	1.55433e-13	0.325287	0.153	0.062	3.72527e-09	ACs/HCs/RGCs	MIR1723
TXN	1.96109e-13	0.36359	0.664	0.515	4.70015e-09	ACs/HCs/RGCs	TXN
NKAIN46	3.26232e-13	0.309418	0.264	0.138	7.81879e-09	ACs/HCs/RGCs	NKAIN4
MYO64	1.58107e-12	0.328137	0.23	0.116	3.78936e-08	ACs/HCs/RGCs	MYO6
EIF52	1.78183e-12	0.30052	0.76	0.625	4.2705e-08	ACs/HCs/RGCs	EIF5
TOX35	2.03951e-12	0.318455	0.442	0.291	4.88809e-08	ACs/HCs/RGCs	TOX3
ALS2CL1	6.53191e-12	0.326534	0.183	0.086	1.5655e-07	ACs/HCs/RGCs	ALS2CL
FDFT15	8.84179e-12	0.333222	0.363	0.223	2.11911e-07	ACs/HCs/RGCs	FDFT1
LSS1	8.99431e-12	0.302467	0.185	0.086	2.15567e-07	ACs/HCs/RGCs	LSS
CDKN1A4	2.19477e-11	0.281385	0.395	0.251	5.26021e-07	ACs/HCs/RGCs	CDKN1A
OLFML2B1	2.2651e-11	0.291361	0.163	0.073	5.42876e-07	ACs/HCs/RGCs	OLFML2B
MYL42	2.98945e-11	0.306382	0.185	0.091	7.1648e-07	ACs/HCs/RGCs	MYL4
DNMT3B	4.73648e-11	0.305523	0.202	0.102	1.13519e-06	ACs/HCs/RGCs	DNMT3B
PDE3A3	6.31765e-11	0.297529	0.151	0.067	1.51415e-06	ACs/HCs/RGCs	PDE3A
SUSD67	6.45089e-11	0.286102	0.321	0.191	1.54609e-06	ACs/HCs/RGCs	SUSD6
KLHL251	1.081e-10	0.314717	0.235	0.129	2.59082e-06	ACs/HCs/RGCs	KLHL25
PDRG16	1.11079e-10	0.268417	0.435	0.291	2.66223e-06	ACs/HCs/RGCs	PDRG1
DGAT21	1.43546e-10	0.256691	0.116	0.046	3.44036e-06	ACs/HCs/RGCs	DGAT2
BAMBI8	2.16012e-10	0.274294	0.664	0.515	5.17715e-06	ACs/HCs/RGCs	BAMBI
DTX43	3.7075e-10	0.318517	0.299	0.182	8.88576e-06	ACs/HCs/RGCs	DTX4
EPHA45	1.98249e-09	0.337462	0.259	0.157	4.75144e-05	ACs/HCs/RGCs	EPHA4
FRMD4A6	2.2137e-09	0.28159	0.378	0.247	5.30558e-05	ACs/HCs/RGCs	FRMD4A
RPS6KA3	6.07184e-09	0.295224	0.173	0.089	0.000145524	ACs/HCs/RGCs	RPS6KA3
FDPS4	6.29278e-09	0.375274	0.435	0.319	0.000150819	ACs/HCs/RGCs	FDPS
INSIG14	1.00167e-08	0.301672	0.351	0.231	0.000240071	ACs/HCs/RGCs	INSIG1
PIM32	1.44967e-08	0.279259	0.299	0.192	0.000347443	ACs/HCs/RGCs	PIM3
MAML21	8.01484e-08	0.252876	0.165	0.09	0.00192092	ACs/HCs/RGCs	MAML2
NDUFC21	1.07257e-07	0.285532	0.719	0.645	0.00257064	ACs/HCs/RGCs	NDUFC2
HYAL22	1.53843e-07	0.273257	0.304	0.204	0.00368717	ACs/HCs/RGCs	HYAL2
APOA11	1.66398e-07	0.3504	0.104	0.047	0.00398806	ACs/HCs/RGCs	APOA1
SP89	3.18325e-07	0.320803	0.205	0.121	0.00762928	ACs/HCs/RGCs	SP8
NDUFAF8	3.24094e-07	0.262501	0.462	0.354	0.00776756	ACs/HCs/RGCs	NDUFAF8
CCDC88C2	4.39352e-07	0.266485	0.284	0.189	0.01053	ACs/HCs/RGCs	CCDC88C
DHRS34	4.84351e-07	0.339672	0.212	0.131	0.0116085	ACs/HCs/RGCs	DHRS3
DRG22	9.03042e-07	0.270474	0.244	0.159	0.0216432	ACs/HCs/RGCs	DRG2
NPY3	1.81524e-06	0.401472	0.16	0.092	0.043506	ACs/HCs/RGCs	NPY
TACC26	5.97304e-06	0.277205	0.309	0.218	0.143156	ACs/HCs/RGCs	TACC2
RAX10	7.63327e-06	0.25194	0.252	0.171	0.182946	ACs/HCs/RGCs	RAX
MYT15	1.82126e-05	0.263355	0.679	0.627	0.436501	ACs/HCs/RGCs	MYT1

## Sheet: New
	p_val	avg_logFC	pct.1	pct.2	p_val_adj	cluster	gene
SPIK21	0	1.81138	0.761	0.22	0	New	SPIK2
LOC101747932	0	1.36015	0.32	0.021	0	New	LOC101747932
BRINP2	0	1.2529	0.326	0.02	0	New	BRINP2
SULF21	0	1.11313	0.542	0.116	0	New	SULF2
BASP11	0	1.0429	0.988	0.85	0	New	BASP1
MAP1B1	0	1.03234	0.922	0.551	0	New	MAP1B
STMN21	0	0.981289	0.824	0.352	0	New	STMN2
YWHAG1	0	0.953985	0.939	0.652	0	New	YWHAG
DUSP41	6.80266e-295	0.888756	0.3	0.037	1.63039e-290	New	DUSP4
ERBB4	1.13427e-278	0.846173	0.284	0.034	2.7185e-274	New	ERBB4
UNC791	1.54967e-265	0.841172	0.329	0.055	3.71409e-261	New	UNC79
ELAVL41	1.09076e-258	0.744121	0.815	0.425	2.61424e-254	New	ELAVL4
CRABP11	1.51868e-253	1.75972	0.585	0.238	3.63982e-249	New	CRABP1
LOC1017490161	2.77033e-250	0.92206	0.676	0.283	6.63965e-246	New	LOC101749016
ADCYAP11	3.36837e-245	1.21639	0.547	0.196	8.07297e-241	New	ADCYAP1
ONECUT31	2.69673e-242	0.82056	0.527	0.158	6.46326e-238	New	ONECUT3
TUBA1A2	5.92027e-238	0.477449	0.998	0.992	1.41891e-233	New	TUBA1A
TUBB2B1	3.19154e-236	0.775251	0.9	0.659	7.64915e-232	New	TUBB2B
REEP11	2.01039e-231	0.81086	0.495	0.154	4.81831e-227	New	REEP1
NRG3	2.40737e-228	0.83442	0.396	0.099	5.76973e-224	New	NRG3
KALRN1	6.92478e-227	0.818313	0.596	0.228	1.65966e-222	New	KALRN
TNFRSF141	7.66498e-209	0.758586	0.373	0.095	1.83707e-204	New	TNFRSF14
SH3BGRL31	1.75553e-207	0.905329	0.508	0.192	4.20748e-203	New	SH3BGRL3
MARCKSL11	2.84211e-205	0.749967	0.882	0.732	6.81168e-201	New	MARCKSL1
SOX121	1.05199e-195	0.804992	0.435	0.136	2.5213e-191	New	SOX12
RRP121	3.59558e-193	0.830286	0.324	0.077	8.61753e-189	New	RRP12
AMER11	2.7936e-190	0.845396	0.441	0.149	6.69542e-186	New	AMER1
LOC7683921	3.17069e-188	0.849595	0.601	0.267	7.59919e-184	New	LOC768392
ERNI1	7.21381e-187	0.874566	0.668	0.337	1.72893e-182	New	ERNI
TMSB4X1	1.04086e-186	0.512362	0.998	0.981	2.49463e-182	New	TMSB4X
GPC6	1.93203e-183	0.660202	0.19	0.022	4.6305e-179	New	GPC6
TUBB31	2.03644e-179	0.639836	0.812	0.54	4.88074e-175	New	TUBB3
SIX3	5.83184e-178	0.606804	0.903	0.699	1.39772e-173	New	SIX3
ASTN1	5.9812e-177	0.570536	0.176	0.019	1.43351e-172	New	ASTN1
DCBLD21	7.08633e-176	0.970703	0.525	0.239	1.69838e-171	New	DCBLD2
ASIC41	5.04849e-174	0.752022	0.319	0.078	1.20997e-169	New	ASIC4
BTBD17	5.3118e-174	0.773152	0.513	0.207	1.27308e-169	New	BTBD17
TMEM132E1	2.65945e-171	0.735655	0.402	0.125	6.3739e-167	New	TMEM132E
LOC1125318711	2.46781e-169	0.871954	0.441	0.157	5.9146e-165	New	LOC112531871
UNC13C1	2.75388e-167	0.745957	0.371	0.115	6.60022e-163	New	UNC13C
OLIG21	1.54545e-158	0.655991	0.762	0.432	3.70398e-154	New	OLIG2
LOC1070500291	8.6303e-157	0.624379	0.234	0.045	2.06842e-152	New	LOC107050029
LRRC3C1	8.56736e-153	0.722625	0.485	0.202	2.05334e-148	New	LRRC3C
FABP6	1.27524e-152	0.732767	0.249	0.054	3.05637e-148	New	FABP6
TMSB4Y1	2.45365e-152	0.568295	0.841	0.588	5.88065e-148	New	TMSB4Y
FAM155A	9.15173e-145	0.414388	0.117	0.008	2.1934e-140	New	FAM155A
FGF191	2.50941e-142	0.430162	0.515	0.204	6.0143e-138	New	FGF19
TMSB15B1	8.27949e-141	0.497963	0.854	0.615	1.98435e-136	New	TMSB15B
CPLX21	3.17709e-137	0.671385	0.486	0.205	7.61452e-133	New	CPLX2
CHN2	4.27388e-137	0.713684	0.497	0.233	1.02432e-132	New	CHN2
INSM11	4.89728e-137	0.504062	0.929	0.75	1.17373e-132	New	INSM1
LOC1125328921	2.77542e-136	0.687015	0.443	0.181	6.65185e-132	New	LOC112532892
RAB6A1	2.74992e-133	0.471429	0.891	0.704	6.59073e-129	New	RAB6A
CSRNP11	1.99666e-132	0.692386	0.378	0.139	4.7854e-128	New	CSRNP1
RSL24D1	5.16632e-132	0.688846	0.61	0.366	1.23821e-127	New	RSL24D1
MLLT111	2.52141e-131	0.59757	0.661	0.39	6.04307e-127	New	MLLT11
KIF1A1	2.01682e-130	0.609834	0.55	0.271	4.83371e-126	New	KIF1A
GAS6	3.98078e-129	0.628056	0.328	0.108	9.54074e-125	New	GAS6
BRINP11	1.07561e-128	0.664358	0.377	0.14	2.57792e-124	New	BRINP1
TMEM151B1	9.89263e-128	0.652223	0.226	0.053	2.37097e-123	New	TMEM151B
AGRN1	1.53754e-126	0.536098	0.543	0.252	3.68502e-122	New	AGRN
ECEL1	2.98554e-126	0.667149	0.203	0.043	7.15543e-122	New	ECEL1
LOC1008572991	1.50599e-125	0.730435	0.386	0.149	3.6094e-121	New	LOC100857299
ATP2B2	1.58531e-124	0.469869	0.15	0.022	3.79952e-120	New	ATP2B2
JUND1	3.68627e-124	0.662171	0.741	0.538	8.83488e-120	New	JUND
SOX111	1.21039e-123	0.514805	0.8	0.58	2.90094e-119	New	SOX11
NKD1	1.42111e-121	0.670516	0.267	0.079	3.40598e-117	New	NKD1
CLVS21	3.27406e-121	0.654566	0.524	0.272	7.84694e-117	New	CLVS2
MYT1L1	1.02018e-120	0.569082	0.268	0.077	2.44506e-116	New	MYT1L
PPP1R17	1.91494e-119	0.45931	0.116	0.012	4.58953e-115	New	PPP1R17
MAPK101	1.88898e-117	0.555742	0.285	0.088	4.52732e-113	New	MAPK10
COX6A11	3.70848e-114	0.390771	0.969	0.936	8.88812e-110	New	COX6A1
GFP_reporter	6.02673e-114	1.1309	0.543	0.296	1.44443e-109	New	GFP_reporter
GPM6A1	1.32402e-113	0.466358	0.847	0.645	3.17329e-109	New	GPM6A
SLIT11	5.04279e-113	0.710083	0.523	0.247	1.20861e-108	New	SLIT1
PRDM8	2.23841e-112	0.790183	0.281	0.093	5.36479e-108	New	PRDM8
MAP1S1	9.97942e-111	0.551385	0.691	0.472	2.39177e-106	New	MAP1S
GMEB21	7.59419e-107	0.646763	0.604	0.354	1.8201e-102	New	GMEB2
CALM11	1.31582e-106	0.460411	0.893	0.81	3.15362e-102	New	CALM1
CHRM4	8.2548e-106	0.489446	0.148	0.026	1.97843e-101	New	CHRM4
GSE11	3.47674e-105	0.551827	0.677	0.453	8.33271e-101	New	GSE1
ATP11B1	1.47556e-102	0.635388	0.366	0.156	3.53647e-98	New	ATP11B
NBEA1	1.38884e-101	0.611257	0.475	0.241	3.32863e-97	New	NBEA
SBK11	2.1137e-101	0.562762	0.343	0.135	5.06591e-97	New	SBK1
FGF14	2.46965e-101	0.578925	0.269	0.09	5.91901e-97	New	FGF14
ONECUT11	7.02825e-101	0.382157	0.546	0.28	1.68446e-96	New	ONECUT1
SNCB1	1.70967e-99	0.615327	0.277	0.096	4.09757e-95	New	SNCB
ELMO11	3.81285e-99	0.520192	0.302	0.108	9.13825e-95	New	ELMO1
SLC8A3	1.15216e-98	0.527212	0.215	0.06	2.76139e-94	New	SLC8A3
AMER2	8.85872e-98	0.462347	0.806	0.64	2.12317e-93	New	AMER2
NEO1	8.61417e-97	0.576936	0.579	0.361	2.06456e-92	New	NEO1
ZNF423	3.79134e-96	0.548832	0.604	0.384	9.0867e-92	New	ZNF423
TIMM101	6.68068e-96	0.427732	0.652	0.404	1.60116e-91	New	TIMM10
STMN1	1.03177e-94	0.266464	0.997	0.985	2.47284e-90	New	STMN1
CDK5R11	1.13698e-94	0.522887	0.459	0.217	2.72499e-90	New	CDK5R1
MDGA1	4.0388e-93	0.619307	0.204	0.057	9.67978e-89	New	MDGA1
PPDPF1	1.55063e-92	0.592511	0.366	0.163	3.7164e-88	New	PPDPF
STMN41	1.37685e-91	0.528958	0.201	0.056	3.2999e-87	New	STMN4
EBF11	1.4874e-91	0.470962	0.246	0.08	3.56486e-87	New	EBF1
RBFOX21	2.10677e-91	0.536896	0.411	0.196	5.04929e-87	New	RBFOX2
LOC100859176	5.04275e-91	0.485569	0.192	0.051	1.2086e-86	New	LOC100859176
VAT11	5.2579e-91	0.531248	0.335	0.139	1.26016e-86	New	VAT1
NREP1	3.03842e-90	0.654433	0.605	0.409	7.28219e-86	New	NREP
SYT71	9.92427e-90	0.502256	0.384	0.172	2.37855e-85	New	SYT7
CLTB1	1.32115e-89	0.524826	0.587	0.366	3.16641e-85	New	CLTB
UBE2QL1	7.7752e-89	0.552718	0.317	0.131	1.86348e-84	New	UBE2QL1
PAX61	3.31486e-88	0.390079	0.742	0.474	7.94473e-84	New	PAX6
SRRM4	4.45135e-88	0.510527	0.753	0.581	1.06685e-83	New	SRRM4
EEF1A21	1.32328e-86	0.620619	0.332	0.14	3.1715e-82	New	EEF1A2
TAGLN3	1.82165e-85	0.432682	0.864	0.666	4.36595e-81	New	TAGLN3
NCAN1	2.76501e-85	0.55237	0.265	0.096	6.6269e-81	New	NCAN
UCHL11	9.73443e-84	0.497326	0.528	0.302	2.33305e-79	New	UCHL1
SRSF5	3.17489e-83	0.482613	0.59	0.379	7.60926e-79	New	SRSF5
SMIM20	1.62257e-82	0.579622	0.553	0.37	3.88882e-78	New	SMIM20
CELSR31	8.24017e-82	0.529337	0.384	0.186	1.97492e-77	New	CELSR3
SERINC11	1.97137e-81	0.448002	0.759	0.599	4.72478e-77	New	SERINC1
PAK3	1.15028e-80	0.394938	0.864	0.73	2.75687e-76	New	PAK3
LOC4228941	4.87401e-80	0.49442	0.326	0.142	1.16815e-75	New	LOC422894
MEX3B	1.78382e-78	0.483036	0.67	0.483	4.27528e-74	New	MEX3B
IGSF9B1	1.85576e-77	0.556783	0.386	0.191	4.44771e-73	New	IGSF9B
BCAR11	3.88257e-77	0.551774	0.377	0.189	9.30537e-73	New	BCAR1
NES	6.36851e-77	0.510866	0.585	0.381	1.52634e-72	New	NES
MAB21L11	1.05595e-74	0.480514	0.635	0.448	2.53079e-70	New	MAB21L1
NOVA1	2.14522e-74	0.477802	0.483	0.283	5.14145e-70	New	NOVA1
KIAA1324	5.68569e-73	0.321005	0.107	0.02	1.36269e-68	New	KIAA1324
RIMS31	6.13316e-73	0.417383	0.193	0.062	1.46993e-68	New	RIMS3
GNG21	4.68036e-72	0.375451	0.477	0.255	1.12174e-67	New	GNG2
GADD45A1	5.69263e-72	0.514014	0.705	0.54	1.36435e-67	New	GADD45A
1931-09-01	1.30628e-71	0.474384	0.452	0.253	3.13076e-67	New	2019-09-03
KLHL361	1.40192e-70	0.487904	0.528	0.339	3.35999e-66	New	KLHL36
TMEM63C	1.70144e-70	0.492227	0.259	0.106	4.07785e-66	New	TMEM63C
ASAP2	4.35022e-70	0.539604	0.316	0.15	1.04262e-65	New	ASAP2
CSDC21	2.7609e-69	0.464298	0.283	0.12	6.61706e-65	New	CSDC2
ZNF608	5.38972e-68	0.447522	0.707	0.558	1.29175e-63	New	ZNF608
TMEM47	1.78976e-67	0.49189	0.205	0.073	4.28953e-63	New	TMEM47
ACAP3	2.1917e-67	0.494745	0.407	0.223	5.25285e-63	New	ACAP3
RTN4RL11	2.55586e-66	0.503559	0.211	0.075	6.12564e-62	New	RTN4RL1
EBF31	3.7137e-66	0.518884	0.225	0.081	8.90061e-62	New	EBF3
KCNH21	8.27701e-66	0.563215	0.334	0.164	1.98375e-61	New	KCNH2
CDKN1C	1.42836e-64	0.349292	0.782	0.626	3.42336e-60	New	CDKN1C
MAP61	2.0746e-64	0.396912	0.582	0.375	4.97219e-60	New	MAP6
C9H3orf58	2.77128e-64	0.499204	0.405	0.228	6.64194e-60	New	C9H3orf58
TCF121	4.82117e-64	0.494888	0.667	0.514	1.15549e-59	New	TCF12
SH2D3C	2.53931e-63	0.42738	0.187	0.065	6.08597e-59	New	SH2D3C
ACTC1	3.35488e-63	0.419163	0.106	0.023	8.04063e-59	New	ACTC1
PLCB4	8.08301e-63	0.426426	0.166	0.053	1.93725e-58	New	PLCB4
CDKN1A	4.18016e-62	0.630315	0.401	0.228	1.00186e-57	New	CDKN1A
RPL22L11	9.01568e-62	0.390833	0.789	0.669	2.16079e-57	New	RPL22L1
SLC45A3	1.35831e-61	0.455058	0.268	0.12	3.25546e-57	New	SLC45A3
TEX2	1.59481e-60	0.317592	0.113	0.027	3.82229e-56	New	TEX2
ASTN21	1.78658e-60	0.396612	0.195	0.07	4.2819e-56	New	ASTN2
SEZ6L1	9.47834e-60	0.333254	0.287	0.126	2.27167e-55	New	SEZ6L
LOC101750863	1.04181e-59	0.410495	0.173	0.059	2.49692e-55	New	LOC101750863
1941-03-01	1.094e-59	0.460969	0.327	0.16	2.62199e-55	New	2019-03-04
ATP8B3	1.41698e-59	0.386359	0.172	0.056	3.39608e-55	New	ATP8B3
HK1	3.24921e-59	0.476405	0.415	0.246	7.78739e-55	New	HK1
CACNG5	9.17298e-59	0.449341	0.244	0.106	2.19849e-54	New	CACNG5
RACGAP1L	2.48184e-58	0.401926	0.158	0.05	5.94823e-54	New	RACGAP1L
ADD21	5.17657e-58	0.438695	0.352	0.186	1.24067e-53	New	ADD2
AKAP6	7.09578e-58	0.332235	0.144	0.043	1.70065e-53	New	AKAP6
TOX	5.8628e-57	0.398427	0.707	0.552	1.40514e-52	New	TOX
SCG51	5.52316e-56	0.426422	0.267	0.124	1.32374e-51	New	SCG5
HIC21	7.44135e-56	0.437636	0.538	0.37	1.78347e-51	New	HIC2
DAAM1	8.76611e-56	0.351385	0.633	0.45	2.10097e-51	New	DAAM1
NOC4L	1.44675e-55	0.402147	0.148	0.048	3.46743e-51	New	NOC4L
TMEM255A1	5.51706e-55	0.450372	0.279	0.135	1.32227e-50	New	TMEM255A
SEMA6B	2.78118e-54	0.333611	0.148	0.047	6.66565e-50	New	SEMA6B
PPP1R9B	5.20228e-54	0.458584	0.416	0.258	1.24683e-49	New	PPP1R9B
TTYH21	6.58558e-54	0.409893	0.566	0.403	1.57837e-49	New	TTYH2
UNC5A	7.2362e-54	0.307826	0.101	0.024	1.7343e-49	New	UNC5A
FOXO6	1.39726e-53	0.42218	0.403	0.239	3.3488e-49	New	FOXO6
COCH	3.9408e-53	0.50207	0.209	0.088	9.44493e-49	New	COCH
BAZ1A	4.77725e-53	0.416584	0.613	0.462	1.14496e-48	New	BAZ1A
MAST3	1.08725e-52	0.338244	0.164	0.058	2.60581e-48	New	MAST3
RTN41	1.4883e-52	0.366436	0.733	0.612	3.567e-48	New	RTN4
CELSR2	7.06725e-52	0.427217	0.425	0.264	1.69381e-47	New	CELSR2
CNR11	1.17622e-51	0.420611	0.235	0.102	2.81904e-47	New	CNR1
DBN11	2.57583e-51	0.419674	0.375	0.218	6.17348e-47	New	DBN1
KLF71	2.58202e-51	0.372491	0.243	0.11	6.18833e-47	New	KLF7
NRXN31	5.34135e-51	0.292098	0.324	0.161	1.28016e-46	New	NRXN3
PLA2G4EL5	1.03579e-50	0.309345	0.133	0.041	2.48249e-46	New	PLA2G4EL5
LOC112531390	1.61333e-50	0.290546	0.12	0.034	3.86666e-46	New	LOC112531390
C14orf1321	2.17396e-50	0.404923	0.32	0.168	5.21032e-46	New	C14orf132
PIK3IP11	6.67202e-50	0.407185	0.32	0.172	1.59908e-45	New	PIK3IP1
TTC28	7.62339e-50	0.377932	0.225	0.1	1.8271e-45	New	TTC28
CCDC1771	9.20498e-50	0.372007	0.19	0.076	2.20616e-45	New	CCDC177
SCN8A1	1.15522e-49	0.37114	0.294	0.147	2.76872e-45	New	SCN8A
PELI2	1.79475e-49	0.457577	0.368	0.217	4.30148e-45	New	PELI2
C5H14orf371	4.16704e-49	0.402211	0.258	0.125	9.98715e-45	New	C5H14orf37
TMEFF11	1.97045e-48	0.407633	0.417	0.261	4.72259e-44	New	TMEFF1
DST	2.6637e-48	0.422737	0.269	0.135	6.3841e-44	New	DST
SLC12A9	2.88842e-48	0.482729	0.23	0.108	6.92267e-44	New	SLC12A9
TMTC21	3.01177e-48	0.398056	0.223	0.1	7.2183e-44	New	TMTC2
CRB1	6.00034e-48	0.425315	0.332	0.188	1.4381e-43	New	CRB1
NHLH1	6.63509e-48	0.37504	0.27	0.13	1.59023e-43	New	NHLH1
TUBB2A1	4.08408e-47	0.427114	0.342	0.199	9.78831e-43	New	TUBB2A
NFKBIE	5.28718e-47	0.285864	0.117	0.035	1.26718e-42	New	NFKBIE
VSTM2A	5.66757e-47	0.326475	0.123	0.038	1.35835e-42	New	VSTM2A
LOC1070523891	9.50605e-47	0.325729	0.727	0.624	2.27832e-42	New	LOC107052389
FAM110A1	1.43548e-46	0.34309	0.309	0.161	3.44043e-42	New	FAM110A
CBLB	1.54603e-46	0.413191	0.273	0.14	3.70538e-42	New	CBLB
MBNL31	2.21005e-46	0.388774	0.345	0.197	5.29682e-42	New	MBNL3
KLC4	6.11783e-46	0.397701	0.351	0.204	1.46626e-41	New	KLC4
PODXL21	6.20645e-46	0.365148	0.223	0.102	1.4875e-41	New	PODXL2
SP81	1.10988e-45	0.371023	0.227	0.103	2.66004e-41	New	SP8
CLASP11	1.4882e-45	0.377216	0.498	0.346	3.56676e-41	New	CLASP1
PXYLP11	1.12406e-44	0.413009	0.275	0.144	2.69402e-40	New	PXYLP1
PDRG1	1.23869e-44	0.381797	0.421	0.272	2.96877e-40	New	PDRG1
RTN11	3.82462e-44	0.310757	0.271	0.133	9.16647e-40	New	RTN1
GPR1531	6.43074e-44	0.321758	0.169	0.068	1.54125e-39	New	GPR153
SLIRP	1.21711e-43	0.310159	0.772	0.677	2.91704e-39	New	SLIRP
CHD41	1.28488e-43	0.300119	0.766	0.66	3.07947e-39	New	CHD4
FRY	3.70494e-43	0.354235	0.203	0.091	8.87964e-39	New	FRY
IMMP1L	3.98595e-43	0.385925	0.286	0.155	9.55312e-39	New	IMMP1L
NSG11	7.56323e-43	0.348969	0.432	0.277	1.81268e-38	New	NSG1
ZFHX41	1.35836e-42	0.373371	0.265	0.132	3.25558e-38	New	ZFHX4
NCKAP5	3.26057e-42	0.366607	0.268	0.139	7.81462e-38	New	NCKAP5
NTRK31	3.33351e-42	0.324978	0.165	0.066	7.98941e-38	New	NTRK3
PCDH101	7.05893e-42	0.334759	0.329	0.184	1.69181e-37	New	PCDH10
ANO1	7.52003e-42	0.301802	0.103	0.03	1.80233e-37	New	ANO1
MBP	1.30154e-41	0.35103	0.178	0.077	3.1194e-37	New	MBP
LOC1070508791	1.31481e-41	0.303908	0.164	0.066	3.15121e-37	New	LOC107050879
SOX5	2.04226e-41	0.346109	0.149	0.058	4.89469e-37	New	SOX5
NPTXR	3.02331e-41	0.413902	0.278	0.153	7.24596e-37	New	NPTXR
PLOD2	3.3574e-41	0.423599	0.297	0.169	8.04667e-37	New	PLOD2
TOX3	9.21598e-41	0.397341	0.411	0.274	2.20879e-36	New	TOX3
NOL4	1.45312e-40	0.374186	0.262	0.14	3.48269e-36	New	NOL4
NRXN11	2.81223e-40	0.326271	0.356	0.208	6.74008e-36	New	NRXN1
NRN1	4.11464e-40	0.447087	0.104	0.032	9.86155e-36	New	NRN1
CRYBA41	4.30732e-40	0.304139	0.478	0.314	1.03233e-35	New	CRYBA4
MEX3A1	4.71113e-40	0.256157	0.877	0.812	1.12912e-35	New	MEX3A
FAM163A1	8.14646e-40	0.371266	0.193	0.089	1.95246e-35	New	FAM163A
TMEM8B	8.98097e-40	0.329248	0.164	0.068	2.15247e-35	New	TMEM8B
EDIL31	1.03938e-39	0.334113	0.259	0.133	2.49108e-35	New	EDIL3
NCAM1	1.49126e-39	0.260259	0.913	0.86	3.57409e-35	New	NCAM1
BAMBI1	1.92166e-39	0.270008	0.653	0.494	4.60565e-35	New	BAMBI
RNF220	2.00357e-39	0.389138	0.296	0.17	4.80197e-35	New	RNF220
SETBP1	2.38321e-39	0.350464	0.643	0.525	5.71183e-35	New	SETBP1
ARHGAP28	6.62076e-39	0.337713	0.134	0.051	1.5868e-34	New	ARHGAP28
LRRC75B1	1.20803e-38	0.343021	0.296	0.165	2.8953e-34	New	LRRC75B
CCNG1	1.79432e-38	0.354658	0.579	0.456	4.30045e-34	New	CCNG1
FAM65B	3.08846e-38	0.314996	0.155	0.064	7.40211e-34	New	FAM65B
RNF441	4.0209e-38	0.322532	0.579	0.447	9.63689e-34	New	RNF44
ROBO1	5.15869e-38	0.371134	0.172	0.076	1.23638e-33	New	ROBO1
MAP3K13	7.85681e-38	0.327783	0.209	0.101	1.88304e-33	New	MAP3K13
HSPA12A	1.96875e-37	0.387731	0.343	0.215	4.7185e-33	New	HSPA12A
RUFY3	3.90076e-37	0.381545	0.384	0.252	9.34895e-33	New	RUFY3
RBPJ	6.99823e-37	0.33284	0.227	0.118	1.67726e-32	New	RBPJ
FEZ11	7.57206e-37	0.32876	0.299	0.172	1.8148e-32	New	FEZ1
GRAMD1B	1.04665e-36	0.268047	0.123	0.044	2.5085e-32	New	GRAMD1B
FGD31	2.48627e-36	0.363277	0.229	0.119	5.95885e-32	New	FGD3
PRR71	2.69718e-36	0.364208	0.283	0.161	6.46433e-32	New	PRR7
CHRNA7	5.76819e-36	0.325375	0.124	0.046	1.38246e-31	New	CHRNA7
C21H1orf159	9.26765e-36	0.265798	0.125	0.047	2.22118e-31	New	C21H1orf159
RNASEK1	1.00818e-35	0.28447	0.771	0.711	2.41631e-31	New	RNASEK
TULP4	3.08101e-35	0.370742	0.396	0.271	7.38425e-31	New	TULP4
LOC101747852	3.36563e-35	0.306475	0.123	0.046	8.06641e-31	New	LOC101747852
GDF15	3.73935e-35	0.331481	0.19	0.09	8.96209e-31	New	GDF15
ZMIZ1	3.93207e-35	0.345987	0.589	0.477	9.424e-31	New	ZMIZ1
PPM1E	7.44414e-35	0.350353	0.241	0.129	1.78414e-30	New	PPM1E
SUSD6	1.0715e-34	0.336792	0.297	0.176	2.56807e-30	New	SUSD6
GRIN2B	1.82175e-34	0.276757	0.131	0.052	4.36619e-30	New	GRIN2B
WTIP	2.47155e-34	0.35373	0.254	0.143	5.92356e-30	New	WTIP
RALGDS1	4.70454e-34	0.323588	0.203	0.101	1.12754e-29	New	RALGDS
KCNA3	7.68644e-34	0.25644	0.12	0.045	1.84221e-29	New	KCNA3
KHDRBS2	2.20753e-33	0.294565	0.109	0.04	5.29078e-29	New	KHDRBS2
CFL2	2.50501e-33	0.338478	0.579	0.472	6.00375e-29	New	CFL2
MYT1	2.59049e-33	0.273197	0.725	0.61	6.20864e-29	New	MYT1
RALGAPA2	3.50079e-33	0.3591	0.222	0.118	8.39035e-29	New	RALGAPA2
DYNC1H11	3.73336e-33	0.312327	0.62	0.511	8.94774e-29	New	DYNC1H1
RND31	3.99461e-33	0.329081	0.185	0.09	9.57387e-29	New	RND3
IER5L1	5.32123e-33	0.335826	0.316	0.195	1.27534e-28	New	IER5L
LOC1017505131	5.38193e-33	0.283749	0.184	0.088	1.28989e-28	New	LOC101750513
TMOD21	5.99092e-33	0.319824	0.235	0.125	1.43584e-28	New	TMOD2
AAGAB	8.40036e-33	0.335523	0.28	0.167	2.01331e-28	New	AAGAB
INSM2	1.24967e-32	0.307409	0.578	0.439	2.99508e-28	New	INSM2
LOC112531575	1.38808e-32	0.348285	0.432	0.307	3.32682e-28	New	LOC112531575
TPCN1	1.85504e-32	0.325725	0.36	0.235	4.44597e-28	New	TPCN1
BAHCC1	1.94711e-32	0.358555	0.462	0.343	4.66665e-28	New	BAHCC1
RUNX1T11	2.29418e-32	0.338149	0.342	0.21	5.49845e-28	New	RUNX1T1
PROX1	5.90163e-32	0.250585	0.303	0.181	1.41444e-27	New	PROX1
CLCN41	6.28126e-32	0.295862	0.172	0.081	1.50543e-27	New	CLCN4
LOC112532932	7.08599e-32	0.284148	0.15	0.066	1.6983e-27	New	LOC112532932
MYBL11	8.22835e-32	0.389195	0.414	0.29	1.97209e-27	New	MYBL1
TPPP3	1.17548e-31	0.254017	0.118	0.046	2.81727e-27	New	TPPP3
PCDHGC31	1.87086e-31	0.300579	0.35	0.225	4.4839e-27	New	PCDHGC3
STARD41	6.02449e-31	0.31659	0.176	0.086	1.44389e-26	New	STARD4
LBH	8.55962e-31	0.369814	0.177	0.087	2.05148e-26	New	LBH
PSD3	1.71894e-30	0.276622	0.132	0.056	4.11977e-26	New	PSD3
BCAT1	9.56678e-30	0.307393	0.228	0.127	2.29287e-25	New	BCAT1
DCLK2	1.66501e-29	0.324976	0.459	0.341	3.99052e-25	New	DCLK2
ABRACL	1.67528e-29	0.321178	0.329	0.213	4.01515e-25	New	ABRACL
DCX	4.00917e-29	0.261494	0.148	0.068	9.60877e-25	New	DCX
SHF	1.50511e-28	0.324645	0.255	0.151	3.6073e-24	New	SHF
NCS11	1.5344e-28	0.334144	0.36	0.246	3.67749e-24	New	NCS1
SMUG11	2.06136e-28	0.295842	0.264	0.157	4.94046e-24	New	SMUG1
MAPT1	3.43312e-28	0.291638	0.222	0.124	8.22817e-24	New	MAPT
SEMA4B1	9.78879e-28	0.309734	0.239	0.139	2.34608e-23	New	SEMA4B
RAB33B	1.03456e-27	0.27077	0.18	0.093	2.47953e-23	New	RAB33B
ESRRG1	1.04606e-27	0.290942	0.223	0.124	2.5071e-23	New	ESRRG
LOC107049082	1.23858e-27	0.271633	0.151	0.072	2.9685e-23	New	LOC107049082
FRMD4A	2.12247e-27	0.285772	0.351	0.233	5.08692e-23	New	FRMD4A
TRPM1	5.19103e-27	0.303331	0.156	0.077	1.24413e-22	New	TRPM1
CELF61	5.26054e-27	0.277582	0.313	0.2	1.26079e-22	New	CELF6
HIST1H2B7L21	5.62861e-27	0.275006	0.226	0.127	1.34901e-22	New	HIST1H2B7L2
CASKIN1	7.97608e-27	0.325252	0.198	0.109	1.91163e-22	New	CASKIN1
NIPSNAP3L	1.0627e-26	0.271411	0.172	0.089	2.54698e-22	New	NIPSNAP3L
NEFL	3.39294e-26	0.384454	0.268	0.167	8.13186e-22	New	NEFL
DIXDC11	3.76195e-26	0.283873	0.307	0.198	9.01626e-22	New	DIXDC1
KHDRBS3	4.78969e-26	0.313471	0.226	0.133	1.14795e-21	New	KHDRBS3
LOC107052763	6.81892e-26	0.263848	0.632	0.543	1.63429e-21	New	LOC107052763
PTP4A1	1.02504e-25	0.268848	0.651	0.574	2.4567e-21	New	PTP4A1
DNMT3A1	1.87969e-25	0.261897	0.617	0.518	4.50506e-21	New	DNMT3A
CHD51	2.49351e-25	0.283062	0.311	0.203	5.97618e-21	New	CHD5
RAB30	2.8577e-25	0.308066	0.232	0.139	6.84905e-21	New	RAB30
ITGB1BP1	3.03519e-25	0.277336	0.178	0.095	7.27444e-21	New	ITGB1BP1
GDI21	3.09693e-25	0.272995	0.569	0.468	7.42241e-21	New	GDI2
MGAT4A	8.79905e-25	0.294768	0.174	0.092	2.10887e-20	New	MGAT4A
SLCO5A11	1.47374e-24	0.264523	0.263	0.161	3.53211e-20	New	SLCO5A1
ACTG11	1.54497e-24	0.272537	0.618	0.531	3.70283e-20	New	ACTG1
TRIB2	2.16512e-24	0.325967	0.403	0.303	5.18915e-20	New	TRIB2
TK2	2.35324e-24	0.277964	0.433	0.328	5.64e-20	New	TK2
PHACTR3	2.66574e-24	0.263426	0.175	0.094	6.38897e-20	New	PHACTR3
RFX7	3.38166e-24	0.270553	0.291	0.189	8.10483e-20	New	RFX7
CLIP2	5.50423e-24	0.262206	0.155	0.08	1.3192e-19	New	CLIP2
KIDINS2201	7.7347e-24	0.304846	0.411	0.309	1.85377e-19	New	KIDINS220
HPS6	1.99399e-23	0.273698	0.214	0.127	4.77899e-19	New	HPS6
KIF21B1	3.15579e-23	0.281404	0.236	0.144	7.56349e-19	New	KIF21B
GABARAPL21	3.69842e-23	0.264851	0.477	0.374	8.864e-19	New	GABARAPL2
DLL41	6.32108e-23	0.316319	0.27	0.174	1.51497e-18	New	DLL4
BAZ2A	1.09151e-22	0.273566	0.346	0.245	2.61603e-18	New	BAZ2A
PPP3CA	1.98886e-22	0.306893	0.335	0.237	4.7667e-18	New	PPP3CA
LOC112531849	1.99296e-22	0.291148	0.23	0.143	4.77654e-18	New	LOC112531849
TMEM35B	2.01961e-22	0.265672	0.134	0.066	4.84041e-18	New	TMEM35B
KIAA2022	5.49177e-22	0.310383	0.331	0.236	1.31621e-17	New	KIAA2022
DUSP8	5.73375e-22	0.310394	0.239	0.151	1.37421e-17	New	DUSP8
RTN4RL2	1.20564e-21	0.272168	0.23	0.141	2.88955e-17	New	RTN4RL2
MED24	1.43823e-21	0.304905	0.244	0.157	3.44701e-17	New	MED24
PLPPR3	2.31997e-21	0.252437	0.241	0.151	5.56027e-17	New	PLPPR3
PTPRO1	2.64988e-21	0.293931	0.26	0.168	6.35096e-17	New	PTPRO
PALM1	3.24019e-21	0.25689	0.309	0.212	7.76577e-17	New	PALM
AK11	5.02485e-21	0.326517	0.372	0.279	1.20431e-16	New	AK1
AEN	5.19747e-21	0.278149	0.232	0.147	1.24568e-16	New	AEN
GRIPAP11	9.7122e-21	0.28221	0.203	0.121	2.32772e-16	New	GRIPAP1
GZMM1	1.53481e-20	0.265006	0.379	0.284	3.67848e-16	New	GZMM
DGKE1	1.85496e-20	0.26431	0.252	0.164	4.44577e-16	New	DGKE
NKAIN11	2.64814e-20	0.258404	0.206	0.124	6.3468e-16	New	NKAIN1
RTN21	4.60543e-20	0.265133	0.323	0.23	1.10378e-15	New	RTN2
B4GALT2	1.98902e-19	0.25231	0.257	0.169	4.76709e-15	New	B4GALT2
LYRM4	3.2629e-19	0.258368	0.249	0.166	7.82019e-15	New	LYRM4
EPB411	3.61119e-19	0.254322	0.594	0.52	8.65495e-15	New	EPB41
CNTN4	4.05823e-19	0.278929	0.111	0.054	9.72635e-15	New	CNTN4
MAB21L21	4.7258e-19	0.384347	0.245	0.162	1.13263e-14	New	MAB21L2
NRBP1	1.25805e-18	0.265472	0.249	0.169	3.01518e-14	New	NRBP1
DDIT31	1.30552e-18	0.478397	0.372	0.282	3.12895e-14	New	DDIT3
CADM21	1.50339e-18	0.251912	0.31	0.22	3.60316e-14	New	CADM2
GALNT7	1.75856e-18	0.305751	0.22	0.144	4.21475e-14	New	GALNT7
MYO18A	4.91916e-18	0.25046	0.212	0.137	1.17898e-13	New	MYO18A
HS3ST2	9.24129e-18	0.423575	0.13	0.071	2.21486e-13	New	HS3ST2
MMD2	5.57706e-17	0.259765	0.206	0.133	1.33665e-12	New	MMD2
ELMOD2	9.96764e-17	0.272429	0.358	0.277	2.38894e-12	New	ELMOD2
MDK1	1.27366e-16	0.296968	0.275	0.196	3.05259e-12	New	MDK
LOC101750669	2.03312e-16	0.347329	0.116	0.061	4.87278e-12	New	LOC101750669
CTNNA2	2.91018e-16	0.253799	0.224	0.15	6.97484e-12	New	CTNNA2
ITFG1	2.69397e-15	0.254726	0.229	0.157	6.45664e-11	New	ITFG1
KCNN1	7.87423e-15	0.2519	0.315	0.24	1.88722e-10	New	KCNN1
MDM2	6.5964e-13	0.271657	0.243	0.176	1.58096e-08	New	MDM2
CSNK1G1	7.48417e-13	0.353562	0.57	0.522	1.79373e-08	New	CSNK1G1
GRIK3	2.13142e-12	0.264196	0.114	0.066	5.10838e-08	New	GRIK3
DRG2	3.54055e-11	0.279058	0.21	0.152	8.48563e-07	New	DRG2
SLC12A2	1.95097e-10	0.254547	0.223	0.166	4.6759e-06	New	SLC12A2
NR2F1	3.43012e-07	0.250767	0.35	0.309	0.00822098	New	NR2F1
HSPB91	6.64705e-06	1.13962	0.112	0.158	0.15931	New	HSPB9
