# Supplementary material for: OTX2 represses sister cell fate choices in the developing retina to promote photoreceptor specification
Source: eLife. 2020 Apr 29;9:e54279. doi: 10.7554/eLife.54279 (PMC7237216; doi:10.7554/eLife.54279)
Supplement: Supplementary file 6. [file elife-54279-supp6.csv]

	p_val	avg_logFC	pct.1	pct.2	p_val_adj
CENPF	3.08E-53	1.351647423	0.577	0.161	7.38E-49
TNFSF10	2.67E-47	1.234165139	0.597	0.222	6.39E-43
LOC101748650	5.32E-49	1.229105088	0.637	0.224	1.27E-44
KPNA2	4.71E-49	1.190079565	0.485	0.078	1.13E-44
UBE2C	7.86E-46	1.100543111	0.666	0.298	1.88E-41
CDC20	5.84E-47	1.083304855	0.521	0.12	1.40E-42
NUSAP1	4.00E-41	1.031339264	0.511	0.141	9.58E-37
TUBB4B	1.77E-41	1.019819461	0.759	0.528	4.24E-37
MKI67	1.46E-39	0.990664874	0.456	0.1	3.50E-35
PAX6	1.64E-46	0.975800532	0.619	0.284	3.93E-42
KIF4A	1.34E-44	0.941051054	0.633	0.243	3.21E-40
TPX2	3.81E-38	0.932534762	0.553	0.202	9.14E-34
STMN2	1.22E-24	0.905898593	0.255	0.03	2.93E-20
HMGB2	1.54E-42	0.901592893	0.831	0.626	3.69E-38
TOP2A	3.16E-38	0.890914793	0.671	0.365	7.58E-34
PCDH17	2.82E-40	0.863652118	0.643	0.276	6.76E-36
LOC107052763	2.80E-34	0.795436158	0.636	0.313	6.70E-30
G2E3	4.43E-28	0.780595413	0.363	0.085	1.06E-23
LOC107050024	3.69E-26	0.77534709	0.491	0.204	8.84E-22
CKAP2	3.31E-30	0.774524319	0.518	0.202	7.94E-26
PLK1	1.25E-28	0.758233662	0.391	0.1	3.00E-24
KIF20A	1.25E-27	0.753390606	0.293	0.039	2.99E-23
BUB1B	3.88E-27	0.751344828	0.45	0.152	9.31E-23
CCNB2	1.75E-27	0.750284608	0.383	0.102	4.20E-23
CDK1	6.24E-25	0.718552202	0.456	0.18	1.49E-20
BTBD17	7.54E-26	0.71299456	0.405	0.126	1.81E-21
CCDC173	2.93E-28	0.700585207	0.764	0.546	7.02E-24
TUBA3E	1.38E-23	0.68127252	0.377	0.117	3.30E-19
CDKN2C	1.54E-19	0.68004676	0.324	0.102	3.68E-15
ELAVL4	2.61E-33	0.674678563	0.749	0.474	6.26E-29
SGO1	2.21E-22	0.661022527	0.273	0.052	5.29E-18
NPY	4.86E-08	0.654495334	0.335	0.204	0.001164067
KIFC1	1.67E-20	0.626659789	0.373	0.13	4.00E-16
KIFC1L	1.67E-21	0.624844395	0.371	0.122	3.99E-17
TACC3	3.92E-19	0.6191839	0.347	0.122	9.39E-15
DLGAP5	3.35E-18	0.615791232	0.283	0.083	8.02E-14
NEK2	2.65E-22	0.604588516	0.264	0.043	6.34E-18
TALDO1	7.91E-22	0.602401001	0.499	0.233	1.90E-17
FAM72A	1.45E-20	0.601374833	0.294	0.072	3.48E-16
NCAPH	4.16E-20	0.597021963	0.307	0.083	9.96E-16
PRDM8	3.42E-17	0.594871028	0.262	0.07	8.20E-13
ARHGAP11A	3.85E-21	0.59082872	0.243	0.037	9.24E-17
SPC25	2.15E-18	0.58968595	0.318	0.104	5.14E-14
LOC768392	5.76E-16	0.584352475	0.429	0.215	1.38E-11
CKAP5	1.35E-16	0.58161154	0.378	0.17	3.23E-12
FOXP1	5.56E-20	0.579894462	0.592	0.363	1.33E-15
KIF2C	2.89E-19	0.578866781	0.267	0.061	6.93E-15
HMMR	8.01E-19	0.576284784	0.261	0.059	1.92E-14
PLPPR3	7.83E-18	0.573858871	0.309	0.1	1.88E-13
NET1	8.82E-20	0.57326679	0.228	0.035	2.11E-15
SIX3	1.50E-35	0.569433743	0.913	0.73	3.59E-31
ONECUT2	4.61E-10	0.567743194	0.405	0.243	1.10E-05
RAD21	2.55E-16	0.566896508	0.469	0.257	6.12E-12
ARL6IP1	2.32E-19	0.566292716	0.418	0.178	5.56E-15
CSRNP1	4.52E-17	0.559472568	0.234	0.052	1.08E-12
LRRFIP1	5.16E-13	0.557743466	0.308	0.133	1.24E-08
ADCYAP1	6.15E-11	0.557707203	0.18	0.071	1.47E-06
TUBB2B	4.23E-22	0.557091042	0.781	0.596	1.01E-17
SPAG5	7.04E-20	0.55398183	0.626	0.383	1.69E-15
AURKA	2.85E-18	0.552664326	0.251	0.057	6.82E-14
PTTG1	1.10E-17	0.549854865	0.404	0.172	2.64E-13
DLL1	4.90E-20	0.548472084	0.787	0.689	1.17E-15
HMGB1	8.80E-31	0.548087885	0.867	0.713	2.11E-26
TAGLN3	4.74E-33	0.546710646	0.931	0.73	1.14E-28
RACGAP1	7.18E-18	0.54576049	0.269	0.067	1.72E-13
CCSAP	3.97E-18	0.54528691	0.289	0.08	9.51E-14
CXXC5	4.24E-14	0.539486341	0.508	0.32	1.02E-09
BIRC5	7.36E-18	0.535970176	0.387	0.154	1.76E-13
CKS1B	1.61E-22	0.526126389	0.711	0.522	3.85E-18
RALGAPA2	1.46E-13	0.525931732	0.244	0.083	3.51E-09
MTFR2	8.87E-17	0.515989631	0.253	0.065	2.13E-12
CCND1	7.49E-16	0.513821248	0.284	0.122	1.79E-11
PRSS56	1.38E-12	0.512346445	0.231	0.078	3.30E-08
LOC112531871	1.26E-13	0.511522367	0.31	0.124	3.02E-09
STC2	5.67E-05	0.502006856	0.284	0.2	1
FGF19	1.29E-11	0.498662519	0.148	0.028	3.09E-07
CDKN1A	1.18E-13	0.496684551	0.437	0.224	2.84E-09
KNSTRN	1.09E-13	0.493520456	0.269	0.096	2.61E-09
NUCKS1	9.46E-21	0.492886897	0.764	0.602	2.27E-16
PDZD11	5.65E-14	0.490090395	0.325	0.135	1.35E-09
TFDP2	1.53E-20	0.489187987	0.81	0.674	3.66E-16
PROX1	5.46E-13	0.485904426	0.231	0.095	1.31E-08
CKS2	2.80E-15	0.485752169	0.302	0.111	6.72E-11
B4GALT6	1.15E-15	0.481597019	0.228	0.057	2.77E-11
KMT5A	3.61E-15	0.481508504	0.217	0.052	8.66E-11
JPT1	7.85E-17	0.480685142	0.673	0.496	1.88E-12
INCENP	4.65E-14	0.480123065	0.297	0.113	1.12E-09
FAM126A	2.94E-15	0.479754022	0.277	0.093	7.04E-11
CENPA	1.42E-14	0.476450049	0.382	0.176	3.39E-10
DCK	2.08E-12	0.47394186	0.254	0.096	4.97E-08
CDCA3	5.24E-12	0.472094416	0.465	0.272	1.26E-07
SOGA1	1.01E-13	0.470827342	0.4	0.2	2.42E-09
TNRC18	7.05E-16	0.469307421	0.556	0.377	1.69E-11
ARHGAP32	6.35E-13	0.468531951	0.311	0.135	1.52E-08
MXD3	3.72E-11	0.467882052	0.23	0.085	8.91E-07
KIF14	6.22E-15	0.467316924	0.183	0.033	1.49E-10
LOC427400	8.68E-13	0.459142211	0.321	0.139	2.08E-08
HMGN4	2.17E-21	0.456571739	0.828	0.657	5.20E-17
NUPL2	1.59E-12	0.456375247	0.412	0.23	3.81E-08
C4H20ORF194	1.33E-11	0.455295078	0.361	0.189	3.18E-07
KCNT2	8.01E-13	0.452995502	0.331	0.152	1.92E-08
C2orf88	6.67E-15	0.451347946	0.132	0.004	1.60E-10
NEO1	3.94E-14	0.45092639	0.571	0.398	9.44E-10
NCAPD2	2.25E-13	0.450649595	0.213	0.059	5.39E-09
SLIT1	1.66E-11	0.449478361	0.121	0.013	3.97E-07
LMNB2	2.64E-12	0.44709678	0.356	0.176	6.32E-08
PCNT	6.78E-13	0.447064189	0.235	0.076	1.62E-08
CAMKK2	2.86E-13	0.446767724	0.227	0.067	6.86E-09
TNFAIP8L1	2.25E-13	0.445553289	0.193	0.046	5.39E-09
LBR	2.23E-16	0.443979167	0.745	0.63	5.34E-12
TTK	1.19E-13	0.443764591	0.206	0.052	2.85E-09
SYNE1	5.15E-11	0.443759646	0.229	0.085	1.23E-06
GPSM2	1.61E-13	0.443405793	0.283	0.107	3.85E-09
NRARP	1.83E-13	0.440547932	0.585	0.4	4.38E-09
PNRC2	2.45E-10	0.439743963	0.39	0.226	5.86E-06
CHAC1	2.10E-06	0.439706774	0.32	0.213	0.050335023
LOC101747852	5.30E-14	0.437600586	0.16	0.022	1.27E-09
KIF18A	1.22E-15	0.436429104	0.186	0.028	2.93E-11
KIF20B	1.89E-11	0.434173339	0.236	0.087	4.52E-07
NEUROG2	1.15E-16	0.433314369	0.92	0.885	2.75E-12
DEK	3.01E-12	0.432932027	0.365	0.185	7.21E-08
FAM110A	6.61E-10	0.432637533	0.246	0.104	1.58E-05
KALRN	1.82E-10	0.431810939	0.317	0.161	4.37E-06
STMN1	3.49E-40	0.430423411	0.992	0.98	8.37E-36
BUB1	6.64E-12	0.427829586	0.212	0.067	1.59E-07
LOC100857299	7.53E-10	0.427371851	0.261	0.117	1.80E-05
ESPL1	5.40E-13	0.427098355	0.215	0.061	1.29E-08
ZEB1	7.97E-11	0.426860385	0.334	0.174	1.91E-06
SPIK2	2.79E-05	0.426154068	0.297	0.209	0.668103094
MEX3B	5.11E-13	0.423456529	0.647	0.543	1.22E-08
HDGF	7.05E-22	0.422631293	0.853	0.709	1.69E-17
ZNF608	1.61E-16	0.421832125	0.666	0.443	3.86E-12
H2AFX	5.84E-13	0.419116063	0.187	0.043	1.40E-08
TMEM132E	6.17E-10	0.418547079	0.182	0.061	1.48E-05
H2AFZ	1.05E-16	0.416006763	0.831	0.728	2.51E-12
USH2A	2.26E-11	0.415826605	0.134	0.022	5.42E-07
CHGB	1.22E-05	0.414506274	0.244	0.162	0.292916643
CALM2	3.01E-11	0.414274447	0.526	0.365	7.21E-07
NUP50	5.21E-13	0.414052753	0.268	0.098	1.25E-08
PROM1L	3.37E-12	0.413878085	0.18	0.043	8.07E-08
DDIT3	0.002007696	0.413744323	0.282	0.227	1
CRABP1	0.254024947	0.413220187	0.221	0.211	1
NCAPD3	3.42E-14	0.410971404	0.159	0.022	8.19E-10
SMC2	1.30E-10	0.410541211	0.221	0.08	3.11E-06
ERNI	1.13E-13	0.409310682	0.568	0.348	2.72E-09
KIF11	1.07E-12	0.404955912	0.175	0.037	2.56E-08
MAD2L1	1.46E-10	0.402660994	0.276	0.124	3.51E-06
BASP1	4.34E-16	0.401233328	0.91	0.798	1.04E-11
CEP55	2.60E-12	0.398855494	0.142	0.022	6.23E-08
TNRC18	4.86E-09	0.397337515	0.484	0.339	0.000116535
HRAS	7.61E-11	0.396031224	0.67	0.543	1.82E-06
ECT2	1.49E-10	0.394908851	0.343	0.18	3.58E-06
FABP6	3.02E-08	0.393628489	0.161	0.057	0.000724692
TMSB15B	0.402460922	0.393529524	0.317	0.336	1
4-Mar	3.92E-12	0.392094052	0.108	0.004	9.39E-08
PCDH10	1.52E-06	0.389629928	0.358	0.253	0.036355122
ARHGAP19	3.16E-12	0.387825021	0.17	0.037	7.58E-08
CIT	3.62E-10	0.387146595	0.194	0.065	8.67E-06
WTIP	1.57E-09	0.387112849	0.221	0.091	3.75E-05
TNFRSF14	9.25E-11	0.386873569	0.169	0.046	2.22E-06
HYLS1	2.74E-08	0.385659801	0.256	0.128	0.000657682
MAP1B	7.84E-14	0.383853566	0.771	0.6	1.88E-09
CDCA2	4.77E-12	0.377282732	0.157	0.03	1.14E-07
H2AFV	1.05E-21	0.376565132	0.96	0.933	2.52E-17
PLXNA1	9.68E-09	0.375315317	0.495	0.369	0.000231978
FAM222A	1.44E-09	0.375103611	0.23	0.098	3.44E-05
LOC101748554	4.95E-12	0.374987784	0.134	0.017	1.19E-07
FAM83D	6.59E-12	0.373729316	0.182	0.046	1.58E-07
GDF15	1.31E-13	0.37262665	0.119	0.025	3.13E-09
CCDC15	8.59E-10	0.371817459	0.203	0.074	2.06E-05
MRPL51	4.22E-11	0.369791372	0.686	0.572	1.01E-06
NAV2	2.83E-08	0.367339053	0.318	0.185	0.000677646
NOTCH1	4.07E-18	0.366657416	0.908	0.824	9.76E-14
ROBO1	2.48E-11	0.366475777	0.201	0.063	5.94E-07
PTMS	1.27E-14	0.365720517	0.743	0.546	3.04E-10
DSN1	8.47E-10	0.363676754	0.325	0.17	2.03E-05
KNL1	5.59E-10	0.363096099	0.169	0.05	1.34E-05
YWHAG	0.0011367	0.358389886	0.497	0.48	1
CCNI	1.70E-13	0.357146346	0.752	0.611	4.08E-09
KDM2B	7.59E-07	0.355100961	0.422	0.304	0.018178524
TUBB	2.00E-15	0.352907183	0.84	0.709	4.79E-11
PDE7A	2.00E-09	0.352877898	0.391	0.224	4.78E-05
CEP350L	3.82E-09	0.352514807	0.206	0.098	9.16E-05
BCL7A	2.60E-12	0.352372453	0.712	0.593	6.24E-08
POU3F4	5.84E-10	0.351438402	0.163	0.046	1.40E-05
ZFHX4	3.73E-15	0.350530962	0.102	0.014	8.94E-11
CENPW	5.64E-10	0.349772654	0.262	0.111	1.35E-05
CADM2	8.45E-09	0.349374771	0.227	0.1	0.000202515
DIAPH2	9.43E-08	0.348406216	0.472	0.343	0.002260554
CEP70	1.45E-08	0.348149737	0.256	0.126	0.000347397
KIRREL3	3.20E-08	0.347550747	0.243	0.117	0.000767753
GTSE1	1.67E-10	0.346317936	0.159	0.039	4.01E-06
BAHCC1	1.73E-05	0.345267572	0.38	0.276	0.414822834
TK2	3.29E-09	0.344326351	0.417	0.254	7.89E-05
SIX6	7.43E-21	0.342782481	0.97	0.943	1.78E-16
VIM	3.30E-07	0.342614618	0.389	0.252	0.007903072
KCNH2	7.05E-05	0.339714905	0.186	0.104	1
HJURP	1.26E-08	0.338690275	0.125	0.03	0.000302568
CCNG1	1.64E-09	0.338623323	0.576	0.465	3.93E-05
KIF23	5.78E-11	0.338237025	0.136	0.024	1.38E-06
RAB6A	3.87E-09	0.337092809	0.666	0.548	9.26E-05
TRPC1	9.75E-06	0.336602543	0.406	0.327	0.233627671
HYOU1	5.48E-09	0.336406773	0.219	0.091	0.000131368
TRNAU1AP	2.01E-05	0.335338177	0.431	0.363	0.48257939
SERTAD4	3.18E-08	0.334671693	0.161	0.057	0.000763171
STXBP5	8.25E-08	0.334353634	0.263	0.135	0.001976295
CCNF	6.35E-11	0.331128725	0.147	0.03	1.52E-06
MPZL1	8.28E-08	0.329954415	0.273	0.146	0.00198459
ZSWIM5	3.63E-09	0.329257561	0.571	0.409	8.70E-05
RTKN2	6.27E-09	0.32796124	0.128	0.03	0.000150193
OSBPL9	1.91E-07	0.327193584	0.267	0.141	0.004583165
SAP130	1.22E-07	0.325405655	0.287	0.159	0.002928726
PANK3	2.98E-08	0.325185268	0.573	0.428	0.000715372
TBL1XR1	2.36E-06	0.325116095	0.533	0.467	0.056553648
SULF2	5.78E-08	0.323954649	0.112	0.026	0.0013859
CSE1L	1.29E-08	0.323870297	0.187	0.072	0.000310336
CDKN2A	1.76E-10	0.323521357	0.128	0.022	4.22E-06
DAAM1	1.02E-08	0.32277126	0.624	0.491	0.00024361
GNG2	2.80E-08	0.322436017	0.137	0.053	0.000672101
GLDC	7.49E-07	0.322427193	0.274	0.157	0.01793934
AMER1	8.53E-05	0.32204699	0.23	0.146	1
SPDL1	6.52E-08	0.321970048	0.186	0.076	0.001563759
HSPA12A	1.02E-05	0.321753551	0.282	0.193	0.244511622
CREB3L1	8.48E-09	0.317842315	0.195	0.091	0.000203346
HK1	1.27E-07	0.317789441	0.388	0.246	0.003046452
APP	9.03E-08	0.316990873	0.41	0.276	0.002164598
SMC4	4.13E-07	0.315537468	0.233	0.12	0.009909783
SAPCD2	5.24E-08	0.315143103	0.196	0.083	0.00125581
PLCG1	2.15E-05	0.314060484	0.429	0.313	0.515857056
NMT2	2.07E-07	0.313857614	0.255	0.135	0.004961531
MAP1S	4.92E-08	0.312918911	0.486	0.346	0.001179368
ANLN	6.28E-09	0.312359632	0.129	0.03	0.000150572
CCNB3	1.11E-10	0.310967833	0.13	0.022	2.65E-06
LOC101750502	4.18E-05	0.310689845	0.231	0.15	1
AGRN	3.68E-05	0.310280755	0.178	0.103	0.882706047
GPM6A	0.041011769	0.309821301	0.437	0.427	1
TUBB2A	4.31E-07	0.30954926	0.226	0.113	0.010338863
HNRNPA0	1.68E-10	0.307108529	0.709	0.563	4.03E-06
DCBLD2	1.03E-05	0.30603062	0.243	0.143	0.24664484
CKAP2L	5.70E-07	0.305806147	0.179	0.078	0.01366736
LOC112532932	5.38E-07	0.304119052	0.157	0.063	0.012898618
PDE9A	4.10E-08	0.30367891	0.18	0.07	0.000981873
ABCG1	9.87E-08	0.303495335	0.475	0.364	0.002366235
PPP2R5A	4.62E-06	0.303026723	0.251	0.143	0.110684375
ARL5B	6.82E-07	0.302558001	0.273	0.152	0.016344842
TCF12	2.18E-07	0.302461069	0.551	0.428	0.005234767
AAGAB	3.81E-06	0.30241902	0.239	0.135	0.091327877
THRSPB	5.41E-07	0.302209414	0.176	0.074	0.012971863
BORA	1.70E-10	0.302103116	0.12	0.017	4.08E-06
IGF2BP3	4.33E-07	0.301915232	0.535	0.42	0.010388826
KIAA1549	1.04E-08	0.299952012	0.722	0.633	0.00024945
FTH1	2.13E-16	0.299479664	0.976	0.928	5.10E-12
HSTH2B7	6.76E-05	0.297527645	0.31	0.226	1
PLK4	1.48E-06	0.297108989	0.15	0.061	0.035534467
ADGRL2	2.23E-07	0.295631573	0.165	0.077	0.005350926
SAP30	5.12E-06	0.295537806	0.239	0.133	0.122719233
P4HB	0.000961398	0.295094893	0.322	0.252	1
OLFM1	4.27E-07	0.295007834	0.17	0.083	0.010221739
CENPM	9.48E-09	0.29446	0.134	0.035	0.000227256
EPB41L4B	5.16E-07	0.294403016	0.106	0.028	0.012375029
GMEB2	0.017933627	0.294258774	0.218	0.178	1
GAS2L3	2.14E-07	0.293616697	0.133	0.043	0.005117951
EPHA3	1.81E-08	0.293485332	0.125	0.03	0.000433544
KATNA1	2.88E-10	0.293479982	0.114	0.015	6.91E-06
NASP	9.79E-10	0.29325256	0.503	0.32	2.35E-05
CLSTN2	7.60E-07	0.292573688	0.153	0.061	0.018205035
BRD7	3.60E-10	0.291791465	0.704	0.572	8.63E-06
GKAP1	1.81E-06	0.288879232	0.21	0.107	0.043303342
PKM	3.11E-07	0.288449731	0.878	0.89	0.007447048
FOXN3	5.06E-07	0.288350265	0.577	0.45	0.012132658
HLF	8.58E-06	0.287183595	0.195	0.114	0.205520573
PPP3CA	5.20E-05	0.286522572	0.261	0.163	1
SLC38A1	1.95E-06	0.286488851	0.465	0.339	0.046724759
KCTD20	6.09E-06	0.286262991	0.314	0.207	0.145958368
RAB43	2.30E-05	0.286157405	0.294	0.206	0.550284469
CRYBA4	5.17E-05	0.286006213	0.19	0.116	1
CBX1	3.37E-08	0.285311763	0.451	0.3	0.000808077
ATP1B3	5.79E-05	0.284913736	0.283	0.191	1
SLC12A9	0.000664732	0.284704465	0.194	0.126	1
USP1	1.58E-08	0.284421274	0.256	0.12	0.00037889
MYO6	2.69E-05	0.284198007	0.211	0.131	0.644735199
NDC80	9.66E-08	0.283704297	0.184	0.074	0.002315239
ID1	2.77E-08	0.283598573	0.27	0.133	0.000664435
MLLT11	0.001821554	0.282638543	0.279	0.227	1
SKA2	6.26E-08	0.28178368	0.261	0.128	0.001500249
PTP4A1	1.86E-08	0.281651602	0.678	0.548	0.000444984
MMD2	1.86E-06	0.279948027	0.175	0.092	0.04456519
TERF1	8.41E-09	0.279557966	0.159	0.048	0.000201604
KAT7	1.95E-05	0.279468282	0.391	0.276	0.468134033
KIF15	4.61E-07	0.279422834	0.147	0.054	0.011056533
SLC4A7	8.11E-05	0.278750136	0.382	0.276	1
KIF1A	0.001392874	0.278140043	0.145	0.092	1
HP1BP3	3.06E-06	0.277561719	0.383	0.257	0.07326327
TRIM59	1.98E-06	0.277233696	0.161	0.07	0.047351473
CCND2	1.69E-05	0.276660666	0.178	0.1	0.404716449
BAZ1B	4.95E-05	0.276438175	0.32	0.22	1
NRG3	1.23E-06	0.276170484	0.149	0.059	0.029584546
POU3F2	5.75E-06	0.275994217	0.313	0.198	0.137911232
GAS6	1.96E-05	0.275209695	0.167	0.083	0.469171467
TMEFF1	0.000383376	0.275084968	0.297	0.217	1
PRKCI	6.22E-06	0.274569306	0.236	0.133	0.149181363
CELSR2	3.39E-05	0.274288664	0.289	0.202	0.812737679
ATF4	4.46E-09	0.273914188	0.883	0.851	0.000106811
CDCA7L	1.66E-07	0.2724853	0.263	0.137	0.00398989
TRAIP	3.05E-08	0.272386118	0.112	0.024	0.000731751
PCMT1	2.23E-05	0.272014758	0.222	0.126	0.535527635
DRG2	0.000200887	0.271717852	0.267	0.18	1
JUND	0.001963563	0.271420867	0.49	0.471	1
DLX1	2.87E-06	0.271325827	0.142	0.057	0.068787388
MDM2	0.000991347	0.270972645	0.251	0.174	1
WDR75	0.004565365	0.270904098	0.195	0.148	1
FIGN	4.33E-06	0.270481584	0.175	0.083	0.103849477
tRNA-Ser	2.04E-12	0.27020806	0.988	0.959	4.89E-08
LGR5	1.74E-05	0.270067636	0.246	0.143	0.415935127
PENK	7.74E-07	0.268840083	0.172	0.072	0.018541581
TRUB1	1.89E-06	0.267545373	0.257	0.143	0.045398169
HMGB3	1.39E-06	0.267169383	0.381	0.257	0.033388848
DDIT4	0.001076725	0.26707803	0.774	0.747	1
IMMP1L	0.000257312	0.267050913	0.162	0.1	1
LOC107050595	0.003111555	0.266976109	0.226	0.169	1
ID4	0.001033221	0.266029382	0.223	0.163	1
SACS	3.89E-06	0.265708796	0.187	0.089	0.093231273
AEN	0.00025525	0.264606148	0.19	0.124	1
RBFOX2	1.38E-05	0.263549915	0.219	0.122	0.331710926
HIST1H4I	0.000137116	0.263116789	0.175	0.098	1
FAM43A	0.000481773	0.26284617	0.402	0.315	1
DHRS3	0.000107618	0.262692984	0.177	0.098	1
TUBA1A1	1.93E-11	0.262599656	0.935	0.952	4.62E-07
ST6GAL2	1.01E-05	0.261919232	0.175	0.087	0.241683423
AHCYL1	1.79E-05	0.26135886	0.165	0.08	0.429198131
CHN2	5.66E-05	0.259776526	0.401	0.3	1
SPOCK1	6.48E-06	0.259767394	0.237	0.13	0.155232174
PBK	1.16E-06	0.259196915	0.192	0.089	0.027726971
FBXO5	8.82E-06	0.258731311	0.13	0.052	0.211408273
MESDC1	9.10E-05	0.258621936	0.369	0.272	1
CBX3	2.26E-05	0.25851074	0.541	0.435	0.540986691
ANTXR2	2.00E-07	0.258492274	0.181	0.074	0.004798076
HES4	0.00055353	0.258412004	0.556	0.526	1
ANTXRL	0.000179632	0.257849807	0.429	0.369	1
DARS	7.31E-05	0.25777232	0.302	0.207	1
TICRR	2.47E-07	0.257408844	0.147	0.05	0.005927358
SELENOS	1.69E-05	0.257198157	0.212	0.117	0.405370305
LOC107049257	6.82E-07	0.256680432	0.175	0.074	0.01634437
XBP1	1.96E-06	0.25660168	0.281	0.161	0.046897813
CLIC4	7.05E-05	0.256493569	0.38	0.28	1
RFC1	1.09E-06	0.256338237	0.22	0.111	0.026050846
LOC100859176	2.00E-06	0.256223217	0.101	0.028	0.048028285
ACTR6	0.000143972	0.256164361	0.397	0.307	1
AGO4	2.46E-05	0.256093623	0.178	0.103	0.589804597
PITPNC1	8.60E-06	0.254584086	0.186	0.096	0.20602619
SAMD4A	0.030099795	0.254564092	0.157	0.122	1
CLVS2	0.007837643	0.254417495	0.216	0.172	1
MDGA1	1.60E-06	0.253962714	0.119	0.049	0.038435298
KLF10	0.01246198	0.253741854	0.223	0.172	1
INSM1	1.94E-10	0.252819836	0.926	0.889	4.64E-06
ST3GAL1	0.000956009	0.25272943	0.19	0.129	1
ZNF488	1.47E-07	0.252273266	0.112	0.04	0.003515649
TJP1	1.70E-05	0.252239192	0.197	0.104	0.406820832
NOVA1	8.57E-05	0.25222504	0.387	0.285	1
UHRF1	1.13E-06	0.251340391	0.295	0.167	0.026992147
INSM2	6.20E-10	0.250933355	0.656	0.461	1.49E-05
FRMD4A	0.007426181	0.25063928	0.256	0.214	1
MPP6	4.74E-07	-0.250358693	0.228	0.388	0.011348176
PHGDH	8.19E-06	-0.250990226	0.486	0.602	0.196313303
C1H21ORF91	4.67E-06	-0.251196068	0.1	0.189	0.11201944
NDUFA5	1.46E-08	-0.251244681	0.371	0.584	0.000348891
PXYLP1	5.48E-05	-0.251833498	0.082	0.152	1
RPL8	1.06E-22	-0.25183733	0.986	0.998	2.55E-18
NDUFB10	1.49E-07	-0.252879974	0.411	0.559	0.003574215
HTRA1	3.83E-06	-0.252990842	0.094	0.18	0.091839887
SRRM4	1.87E-07	-0.253575651	0.73	0.798	0.004474293
LHFPL4	0.000582665	-0.253698425	0.139	0.209	1
NEUROD4	2.09E-07	-0.253753654	0.772	0.826	0.005008307
COX17	1.24E-05	-0.254252327	0.207	0.313	0.297709286
BORL4	1.43E-09	-0.256066145	0.817	0.938	3.42E-05
KBTBD11	0.000148797	-0.256215362	0.108	0.178	1
COPG1	0.000124424	-0.256236756	0.157	0.239	1
MRPL44	5.38E-08	-0.259355912	0.338	0.527	0.001288943
TJP1	1.80E-08	-0.260630199	0.17	0.34	0.000430593
PRDX1	5.38E-12	-0.261572839	0.774	0.907	1.29E-07
TYRO3	0.000374374	-0.264979036	0.08	0.139	1
MRPL57	1.70E-08	-0.265090083	0.645	0.767	0.000406324
NME2	1.68E-21	-0.265097334	0.976	0.987	4.03E-17
VSX1	0.001531183	-0.266673244	0.881	0.883	1
TACC2	2.29E-05	-0.266830182	0.22	0.324	0.54828212
PSMC6	2.32E-06	-0.266855528	0.217	0.337	0.055524977
9-Sep	7.76E-09	-0.267024203	0.089	0.233	0.000185926
ANKRD39	9.07E-07	-0.267094847	0.235	0.357	0.021734936
C19orf70	4.31E-09	-0.268438569	0.392	0.559	0.000103374
ATP5G2	6.26E-07	-0.268641661	0.094	0.189	0.01500366
TOX2	6.69E-05	-0.268911968	0.186	0.276	1
SUV39H1	9.97E-09	-0.27037303	0.615	0.754	0.000238847
PRC1	4.51E-07	-0.270615268	0.49	0.643	0.01080876
LIMCH1	5.97E-09	-0.271446502	0.038	0.152	0.000143154
GREB1L	1.74E-07	-0.271447707	0.042	0.117	0.00416488
EZR	1.31E-09	-0.272183518	0.302	0.514	3.15E-05
RACK1	3.47E-24	-0.272461333	0.978	0.991	8.31E-20
RBP5	4.09E-07	-0.2731162	0.161	0.276	0.009800221
CHCHD2	7.73E-11	-0.274267502	0.879	0.928	1.85E-06
CHRDL1	0.000326948	-0.274499097	0.148	0.222	1
SEPW1	7.03E-10	-0.275724456	0.615	0.746	1.68E-05
SOS2	4.78E-06	-0.276516924	0.109	0.2	0.114668947
BHLHE22	2.01E-06	-0.277595987	0.373	0.504	0.048122391
CELSR1	1.56E-05	-0.278992085	0.159	0.252	0.372910692
DYL1	4.26E-07	-0.279119874	0.623	0.717	0.010212773
RPLP0	1.13E-27	-0.281879095	0.991	0.993	2.70E-23
LOC107054204	3.30E-09	-0.285327246	0.146	0.285	7.90E-05
VANGL2	5.33E-09	-0.285856169	0.165	0.336	0.000127728
NFASC	3.61E-06	-0.286257098	0.17	0.274	0.08659492
PMVK	8.52E-08	-0.286669516	0.198	0.356	0.00204207
SLC12A2	2.12E-06	-0.288021972	0.14	0.241	0.050902241
RGS3	0.001134619	-0.288453703	0.331	0.409	1
ASPM	2.89E-08	-0.288629905	0.538	0.712	0.000693025
NPDC1	1.02E-08	-0.288821623	0.109	0.259	0.000243747
SKP1	1.61E-13	-0.288995248	0.846	0.93	3.85E-09
GNG5	2.69E-10	-0.289939316	0.497	0.68	6.45E-06
CRIP2	5.69E-05	-0.292179422	0.146	0.228	1
RAPGEF2	1.23E-07	-0.292225131	0.083	0.18	0.002952888
SERF2	1.15E-10	-0.292814921	0.799	0.889	2.75E-06
NHSL1	8.19E-09	-0.293162234	0.089	0.2	0.000196322
AMER2	3.71E-09	-0.29417961	0.704	0.783	8.89E-05
ALAS1	3.89E-06	-0.295481381	0.194	0.302	0.093132296
ALDOC	4.14E-07	-0.295621425	0.599	0.728	0.00992791
REPS2	2.24E-09	-0.296193685	0.013	0.111	5.38E-05
KIF25	5.38E-11	-0.296396628	0.008	0.117	1.29E-06
NHS	4.75E-06	-0.29701109	0.226	0.337	0.113825121
FBXW7	5.94E-05	-0.297597252	0.458	0.55	1
DENND5B	1.85E-08	-0.298054986	0.612	0.758	0.000442391
NES	3.43E-10	-0.299392853	0.508	0.663	8.22E-06
KLHL4	1.70E-05	-0.300298342	0.224	0.326	0.407500163
RFX5	7.97E-09	-0.301701019	0.04	0.124	0.000190924
SAYSD1	1.18E-05	-0.301871114	0.201	0.298	0.283236699
NIN	2.29E-09	-0.301898978	0.132	0.299	5.50E-05
LHX9	8.25E-10	-0.304349687	0.046	0.141	1.98E-05
FAM210B	1.66E-10	-0.304448644	0.067	0.18	3.98E-06
B3GLCT	2.25E-10	-0.305054128	0.059	0.167	5.39E-06
LOC771200	6.29E-12	-0.306795322	0.056	0.176	1.51E-07
PAPPA	1.74E-07	-0.308685608	0.112	0.24	0.004173966
LOXL1	2.01E-09	-0.309274828	0.023	0.13	4.81E-05
PODXL	8.70E-07	-0.311593619	0.376	0.509	0.02084929
NEK6	4.44E-11	-0.315510089	0.049	0.157	1.06E-06
SHANK3	8.73E-11	-0.315615941	0.069	0.189	2.09E-06
FAM53A	6.03E-06	-0.316115552	0.174	0.27	0.144524759
TCF7	1.52E-07	-0.316295076	0.197	0.322	0.003653261
STK32C	1.32E-12	-0.318639615	0.032	0.135	3.15E-08
RPL14	9.48E-21	-0.319102426	0.9	0.952	2.27E-16
MAGI1	4.51E-09	-0.319815528	0.269	0.462	0.000107967
MTDH	7.10E-10	-0.321823256	0.312	0.513	1.70E-05
ARNT2	2.10E-06	-0.321896128	0.118	0.211	0.050346547
ZNF516	9.07E-09	-0.323533792	0.247	0.396	0.000217379
TPI1	5.83E-08	-0.325126438	0.411	0.533	0.001396601
PDIA4	6.56E-10	-0.327125829	0.109	0.272	1.57E-05
FGF12	5.52E-10	-0.329135609	0.129	0.296	1.32E-05
LRRC75A	3.04E-13	-0.330232431	0.031	0.137	7.29E-09
SPOCK3	6.38E-09	-0.33105699	0.31	0.467	0.000152901
ROBO2	1.23E-06	-0.333891802	0.248	0.363	0.029367882
PCBP3	1.17E-13	-0.334926576	0.173	0.391	2.80E-09
NKAIN4	2.28E-07	-0.335579734	0.108	0.209	0.005456343
HUNK	2.01E-06	-0.336278483	0.122	0.22	0.048273685
FEZF2	3.98E-07	-0.3367705	0.155	0.27	0.009531488
LOC112533362	5.71E-08	-0.337151197	0.128	0.246	0.001368934
CKMT1A	2.53E-13	-0.337635486	0.102	0.297	6.08E-09
CHEK1	1.68E-12	-0.33863242	0.061	0.187	4.03E-08
MSI1	2.97E-10	-0.338965428	0.256	0.459	7.12E-06
NDUFA13	3.86E-21	-0.339797997	0.896	0.968	9.24E-17
RXRG	3.46E-12	-0.340814187	0.049	0.165	8.29E-08
ZNF516	3.68E-10	-0.341277955	0.261	0.464	8.82E-06
PFKFB4L	1.82E-08	-0.341607415	0.441	0.58	0.000436798
KLF9	4.85E-06	-0.341898593	0.072	0.148	0.116165811
C20orf27	1.17E-07	-0.343366129	0.407	0.539	0.002811705
BTG1	4.35E-14	-0.345352923	0.683	0.868	1.04E-09
ENO2	2.69E-08	-0.346403111	0.078	0.176	0.000644538
NDRG1	1.52E-06	-0.350222338	0.132	0.23	0.036432014
NDUFAF8	1.22E-09	-0.350882917	0.363	0.522	2.93E-05
HTRA1	2.12E-11	-0.351298065	0.071	0.231	5.09E-07
LOC112530288	2.44E-10	-0.352009809	0.155	0.302	5.85E-06
MBNL2	4.59E-12	-0.355297621	0.063	0.187	1.10E-07
EEF1D	1.28E-19	-0.355996535	0.84	0.911	3.07E-15
TFAP2D	5.56E-20	-0.356127304	0.911	0.95	1.33E-15
RPL14	7.33E-25	-0.359863969	0.886	0.968	1.76E-20
AvBD5	1.89E-09	-0.36090094	0.088	0.204	4.53E-05
SLC1A4	2.04E-12	-0.364463679	0.094	0.237	4.88E-08
PPP1R1A	5.92E-16	-0.368881425	0.888	0.953	1.42E-11
SOGA3	2.06E-08	-0.369093551	0.289	0.426	0.000494214
LOC107053770	1.39E-13	-0.369609528	0.068	0.204	3.34E-09
PLCH2	1.70E-09	-0.371544409	0.042	0.133	4.09E-05
NDUFA11	8.75E-13	-0.371813296	0.429	0.65	2.10E-08
BCL2	1.54E-09	-0.373421357	0.281	0.43	3.69E-05
OLIG2	1.79E-09	-0.375398722	0.826	0.885	4.30E-05
PRELID1	1.83E-13	-0.375980591	0.403	0.587	4.39E-09
COX8A	5.59E-27	-0.376118631	0.91	0.959	1.34E-22
HMCES	9.14E-13	-0.377157516	0.307	0.535	2.19E-08
PMVK	6.37E-09	-0.379537722	0.148	0.274	0.000152724
DTX4	5.28E-08	-0.38829739	0.161	0.28	0.001265955
LOC107052887	3.76E-11	-0.389449497	0.059	0.172	9.01E-07
TLE3	6.46E-14	-0.395325318	0.376	0.623	1.55E-09
CDK6	8.66E-17	-0.395396536	0.637	0.817	2.08E-12
CDC42BPB	4.47E-07	-0.395515611	0.375	0.48	0.010717614
ITM2B	1.20E-12	-0.397330663	0.26	0.446	2.87E-08
GPX4	2.23E-09	-0.400550505	0.387	0.535	5.35E-05
LRFN3	4.96E-10	-0.405020492	0.173	0.315	1.19E-05
SOX9	9.99E-18	-0.41973919	0.038	0.178	2.39E-13
LBH	1.52E-08	-0.424351693	0.142	0.263	0.000363269
MSI1	3.96E-15	-0.426297358	0.367	0.567	9.48E-11
MAP1A	1.30E-14	-0.427538403	0.408	0.596	3.11E-10
HES5	2.99E-16	-0.427548882	0.64	0.8	7.16E-12
CDON	8.79E-14	-0.433140422	0.074	0.215	2.11E-09
GTF2IRD1	4.83E-17	-0.434862979	0.087	0.259	1.16E-12
MAP2	2.63E-17	-0.440122073	0.461	0.676	6.31E-13
NECAB3	1.05E-09	-0.441032582	0.341	0.483	2.52E-05
ACKR3	6.49E-14	-0.441414157	0.035	0.148	1.56E-09
CCSAP	4.57E-11	-0.441981174	0.228	0.417	1.10E-06
NEUROG1	1.41E-12	-0.446004688	0.135	0.293	3.39E-08
VSX2	1.67E-12	-0.447947171	0.222	0.396	4.01E-08
CTNNAL1	8.78E-14	-0.448368445	0.146	0.315	2.11E-09
NDUFA10	3.40E-14	-0.453805419	0.373	0.561	8.14E-10
TGFB2	5.86E-14	-0.458012105	0.031	0.139	1.40E-09
NHLH1	9.83E-18	-0.464477167	0.141	0.354	2.36E-13
H2A2BL	2.95E-08	-0.466403132	0.642	0.696	0.00070622
ANKRD6	1.20E-13	-0.46906267	0.163	0.339	2.87E-09
RGCC	2.27E-26	-0.483395374	0.012	0.163	5.44E-22
C1orf53	6.70E-21	-0.484575172	0.046	0.211	1.61E-16
MAP4K3	8.87E-12	-0.494722449	0.17	0.36	2.13E-07
BTG2	1.46E-19	-0.501271472	0.306	0.537	3.49E-15
TMEM161A	5.43E-11	-0.5099325	0.201	0.352	1.30E-06
MDK	1.18E-17	-0.511498867	0.106	0.289	2.83E-13
HSPB9	7.10E-07	-0.513818209	0.087	0.18	0.017009423
B3GAT2	1.33E-18	-0.51796825	0.015	0.133	3.18E-14
NID1	4.96E-23	-0.532384091	0.031	0.191	1.19E-18
OTX2	7.09E-35	-0.536843647	0.553	0.911	1.70E-30
CCDC85C	1.23E-17	-0.540074236	0.175	0.37	2.94E-13
UNC119	1.82E-20	-0.544039242	0.072	0.254	4.35E-16
COL18A1	3.97E-18	-0.54828706	0.093	0.272	9.51E-14
PIBPPDD4L	1.08E-19	-0.559122683	0.076	0.257	2.60E-15
FAM53B	3.74E-15	-0.562601351	0.121	0.289	8.96E-11
PRDM1	8.01E-22	-0.565564117	0.054	0.233	1.92E-17
YBX3	6.61E-21	-0.566843584	0.324	0.559	1.58E-16
STAT5B	1.01E-26	-0.579311639	0.022	0.191	2.42E-22
COL2A1	1.20E-18	-0.581705709	0.254	0.478	2.87E-14
CDKN1C	3.32E-25	-0.582801572	0.599	0.843	7.95E-21
LRRN2	3.50E-23	-0.590079375	0.109	0.398	8.40E-19
MRAS	2.66E-22	-0.599280514	0.112	0.387	6.36E-18
INPP4A	1.75E-23	-0.605103352	0.463	0.696	4.19E-19
TRHDE	3.11E-22	-0.608505775	0.074	0.267	7.45E-18
GPM6B	1.51E-22	-0.615692244	0.267	0.524	3.62E-18
RBP4	1.22E-29	-0.618864642	0.043	0.348	2.93E-25
ZNF804A	5.16E-18	-0.626854046	0.122	0.309	1.24E-13
AGFG1	4.13E-24	-0.630033334	0.126	0.354	9.90E-20
CPE	3.72E-30	-0.652370657	0.388	0.719	8.92E-26
NRN1L	3.90E-22	-0.683109015	0.059	0.237	9.34E-18
DIO3	8.44E-12	-0.706439931	0.276	0.433	2.02E-07
KLHL35	7.15E-28	-0.715531158	0.122	0.367	1.71E-23
TBX2	4.14E-33	-0.727968028	0.129	0.415	9.92E-29
LPIN1	1.53E-31	-0.742684511	0.065	0.302	3.67E-27
SLC4A4	1.27E-30	-0.751286044	0.048	0.265	3.05E-26
AHR1B	7.68E-39	-0.766750083	0.061	0.333	1.84E-34
LOC112533358	1.86E-49	-0.968062386	0.234	0.68	4.46E-45
RAX2	1.99E-55	-0.997217469	0.123	0.509	4.77E-51
