# Supplementary figures and images for: OTX2 represses sister cell fate choices in the developing retina to promote photoreceptor specification
Source: eLife journal article supplement (doi:10.7554/elife.54279), 2020-04-29

**Figure 5 Supplement 2**

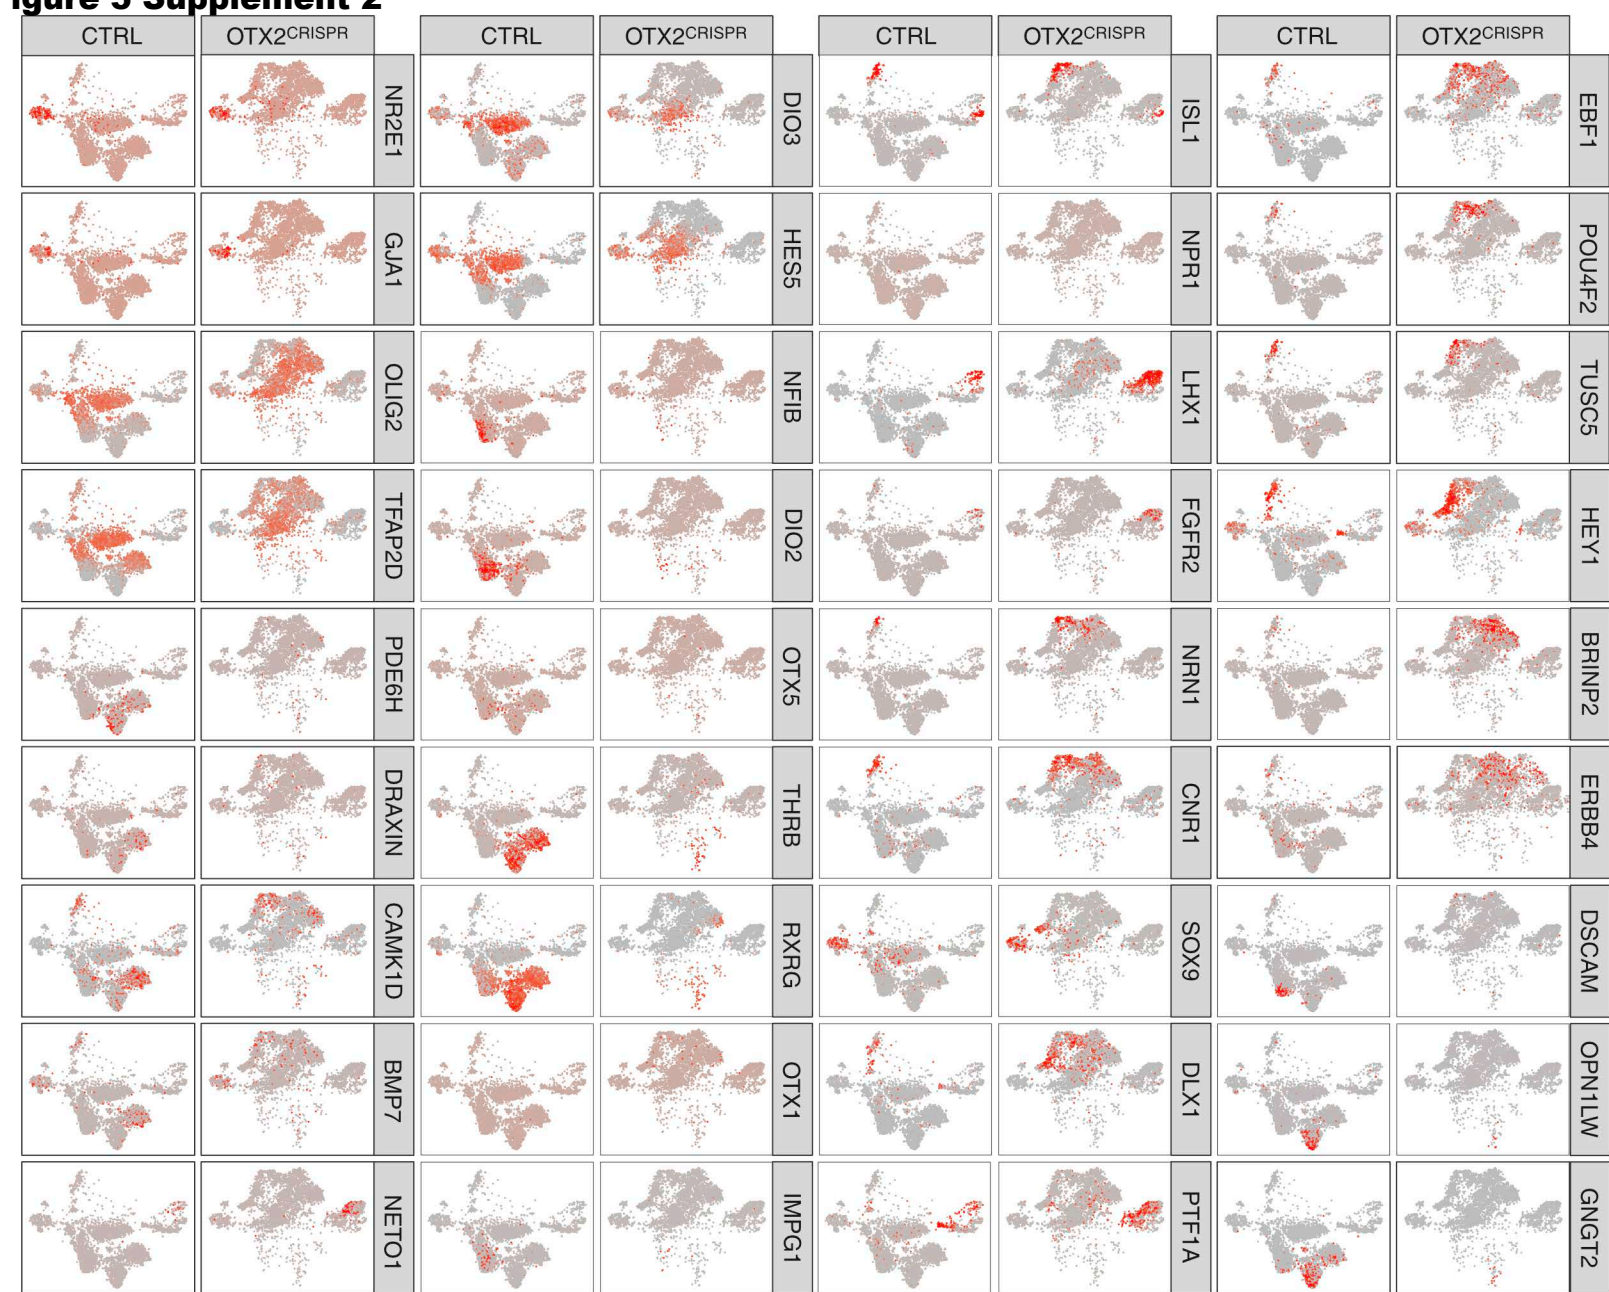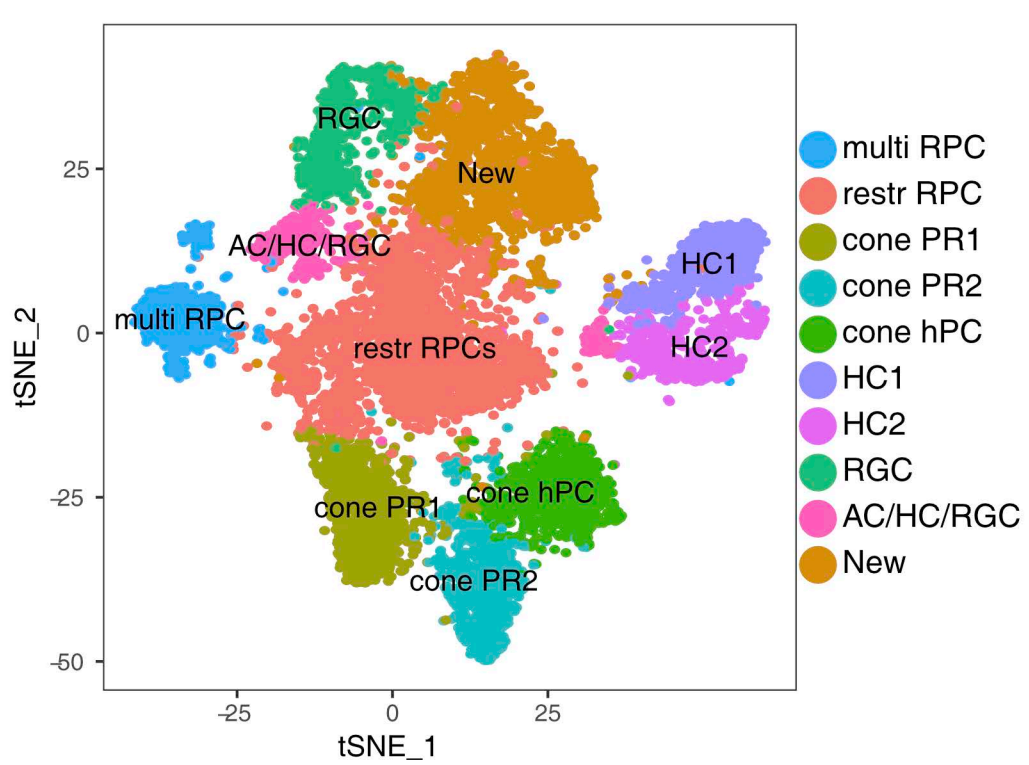

Supplement: supp [file elife-54279-supp-v1.zip]

**Figure 6 Supplement 1**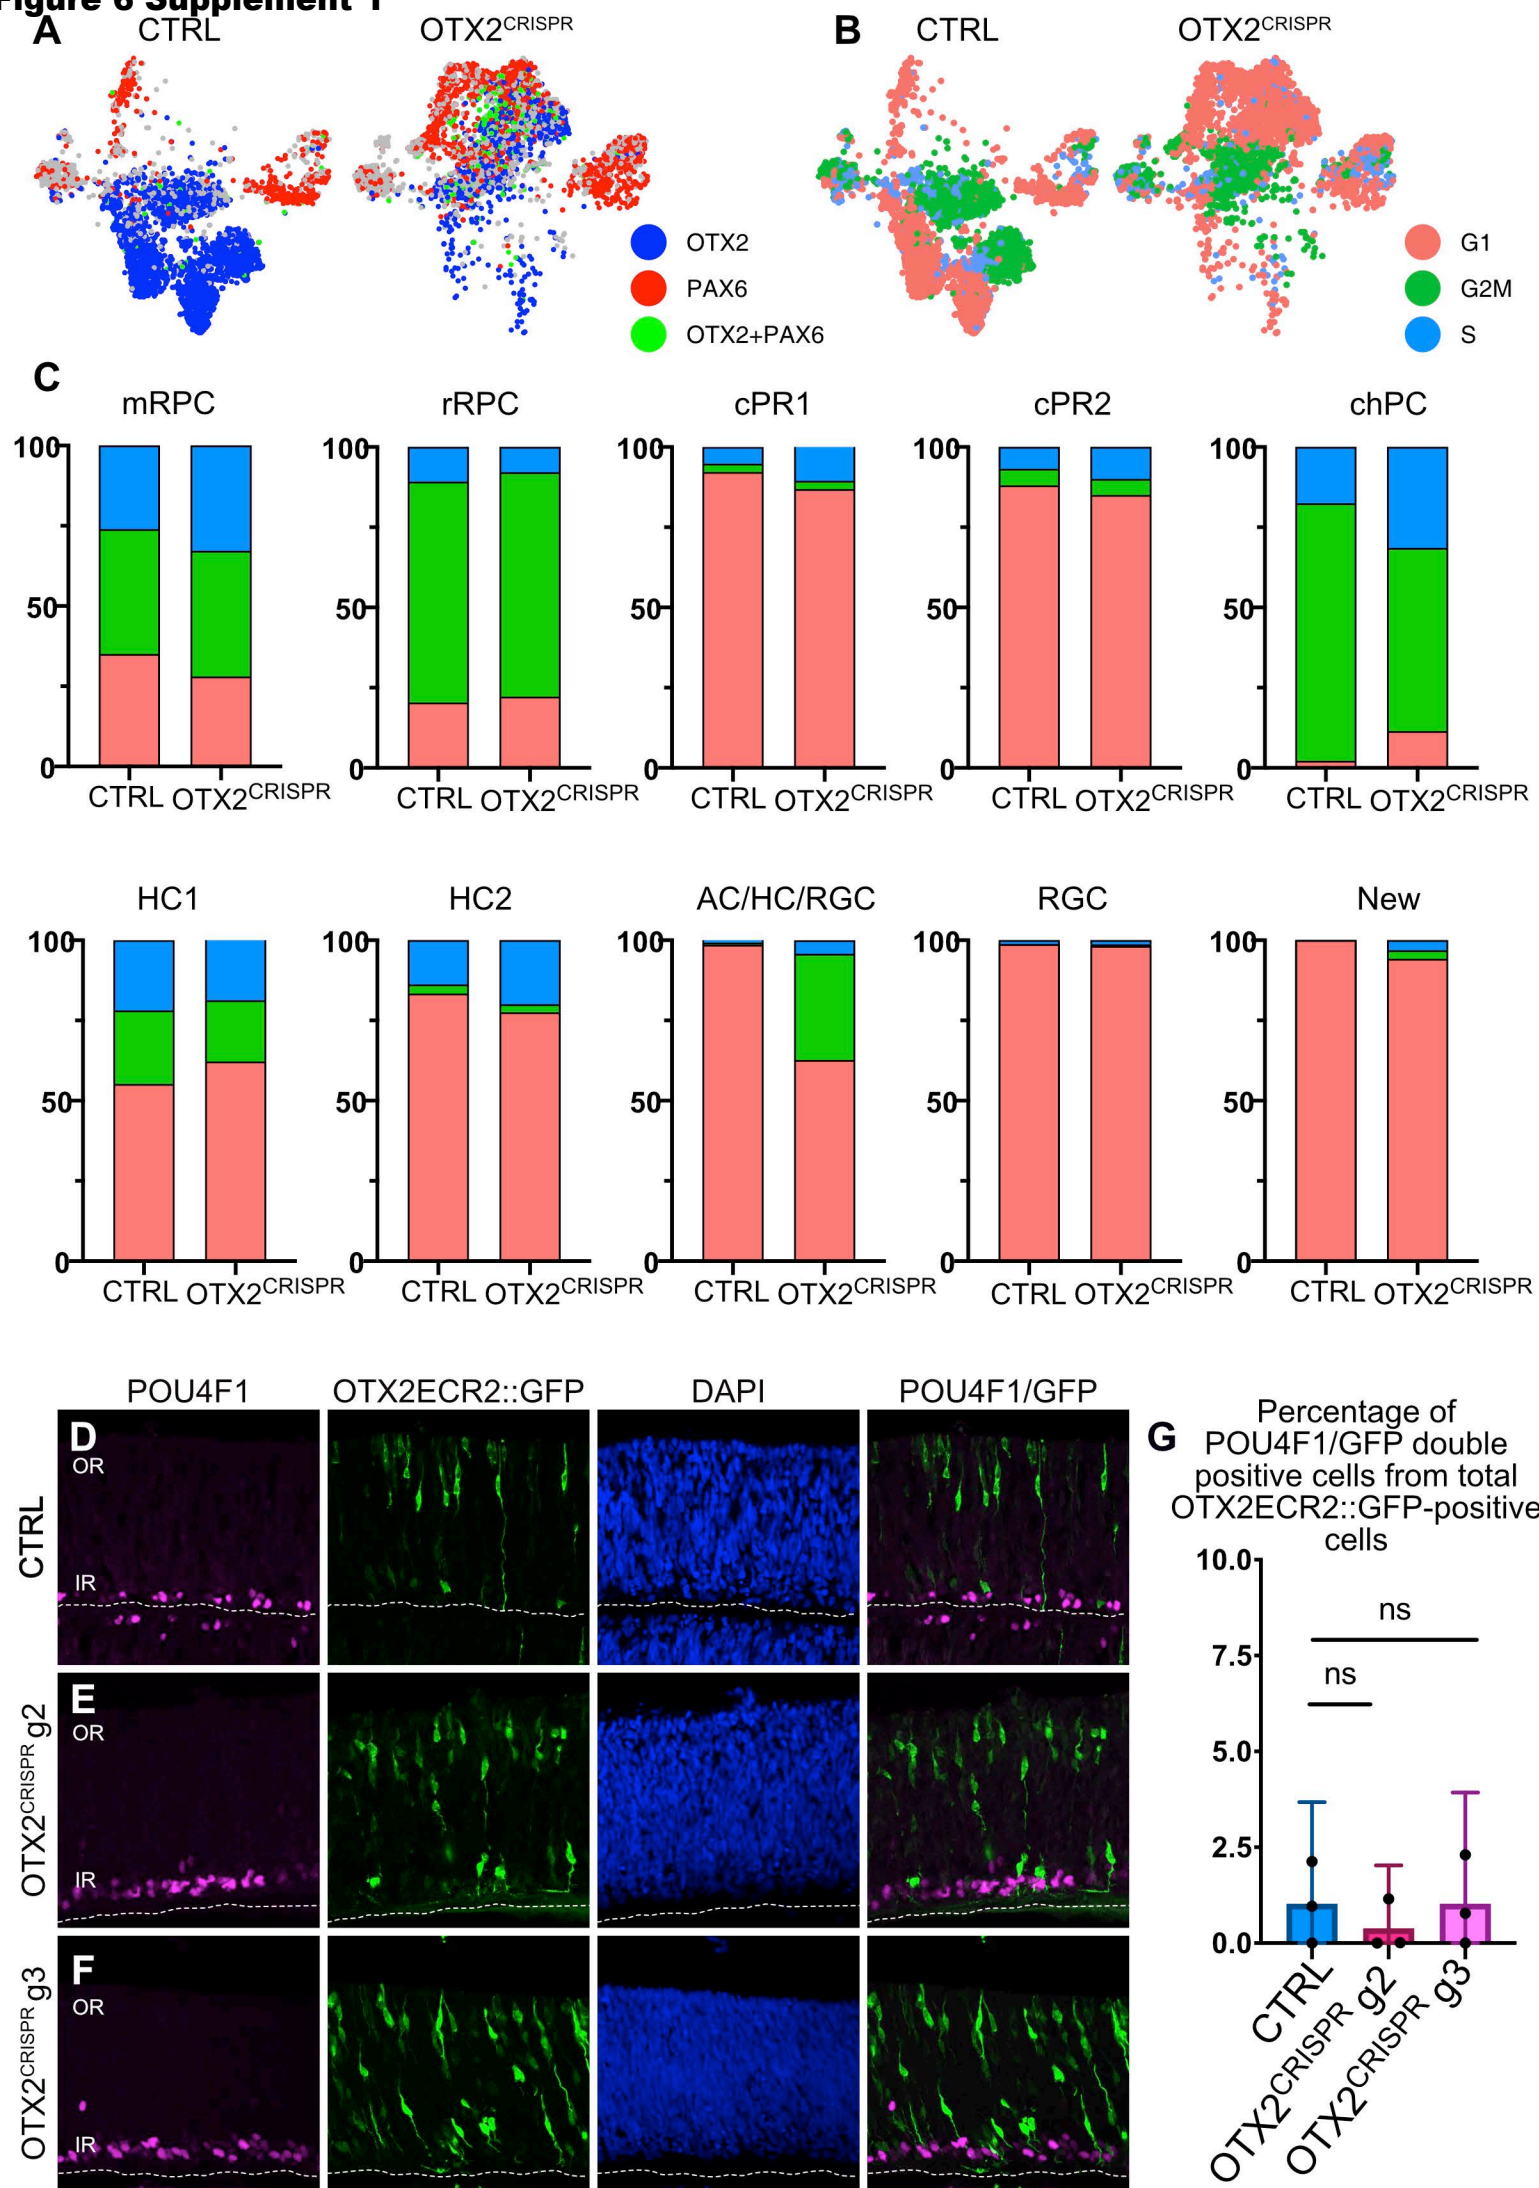

Supplement: supp [file elife-54279-supp-v1.zip]

Figure 5 Supplement 3

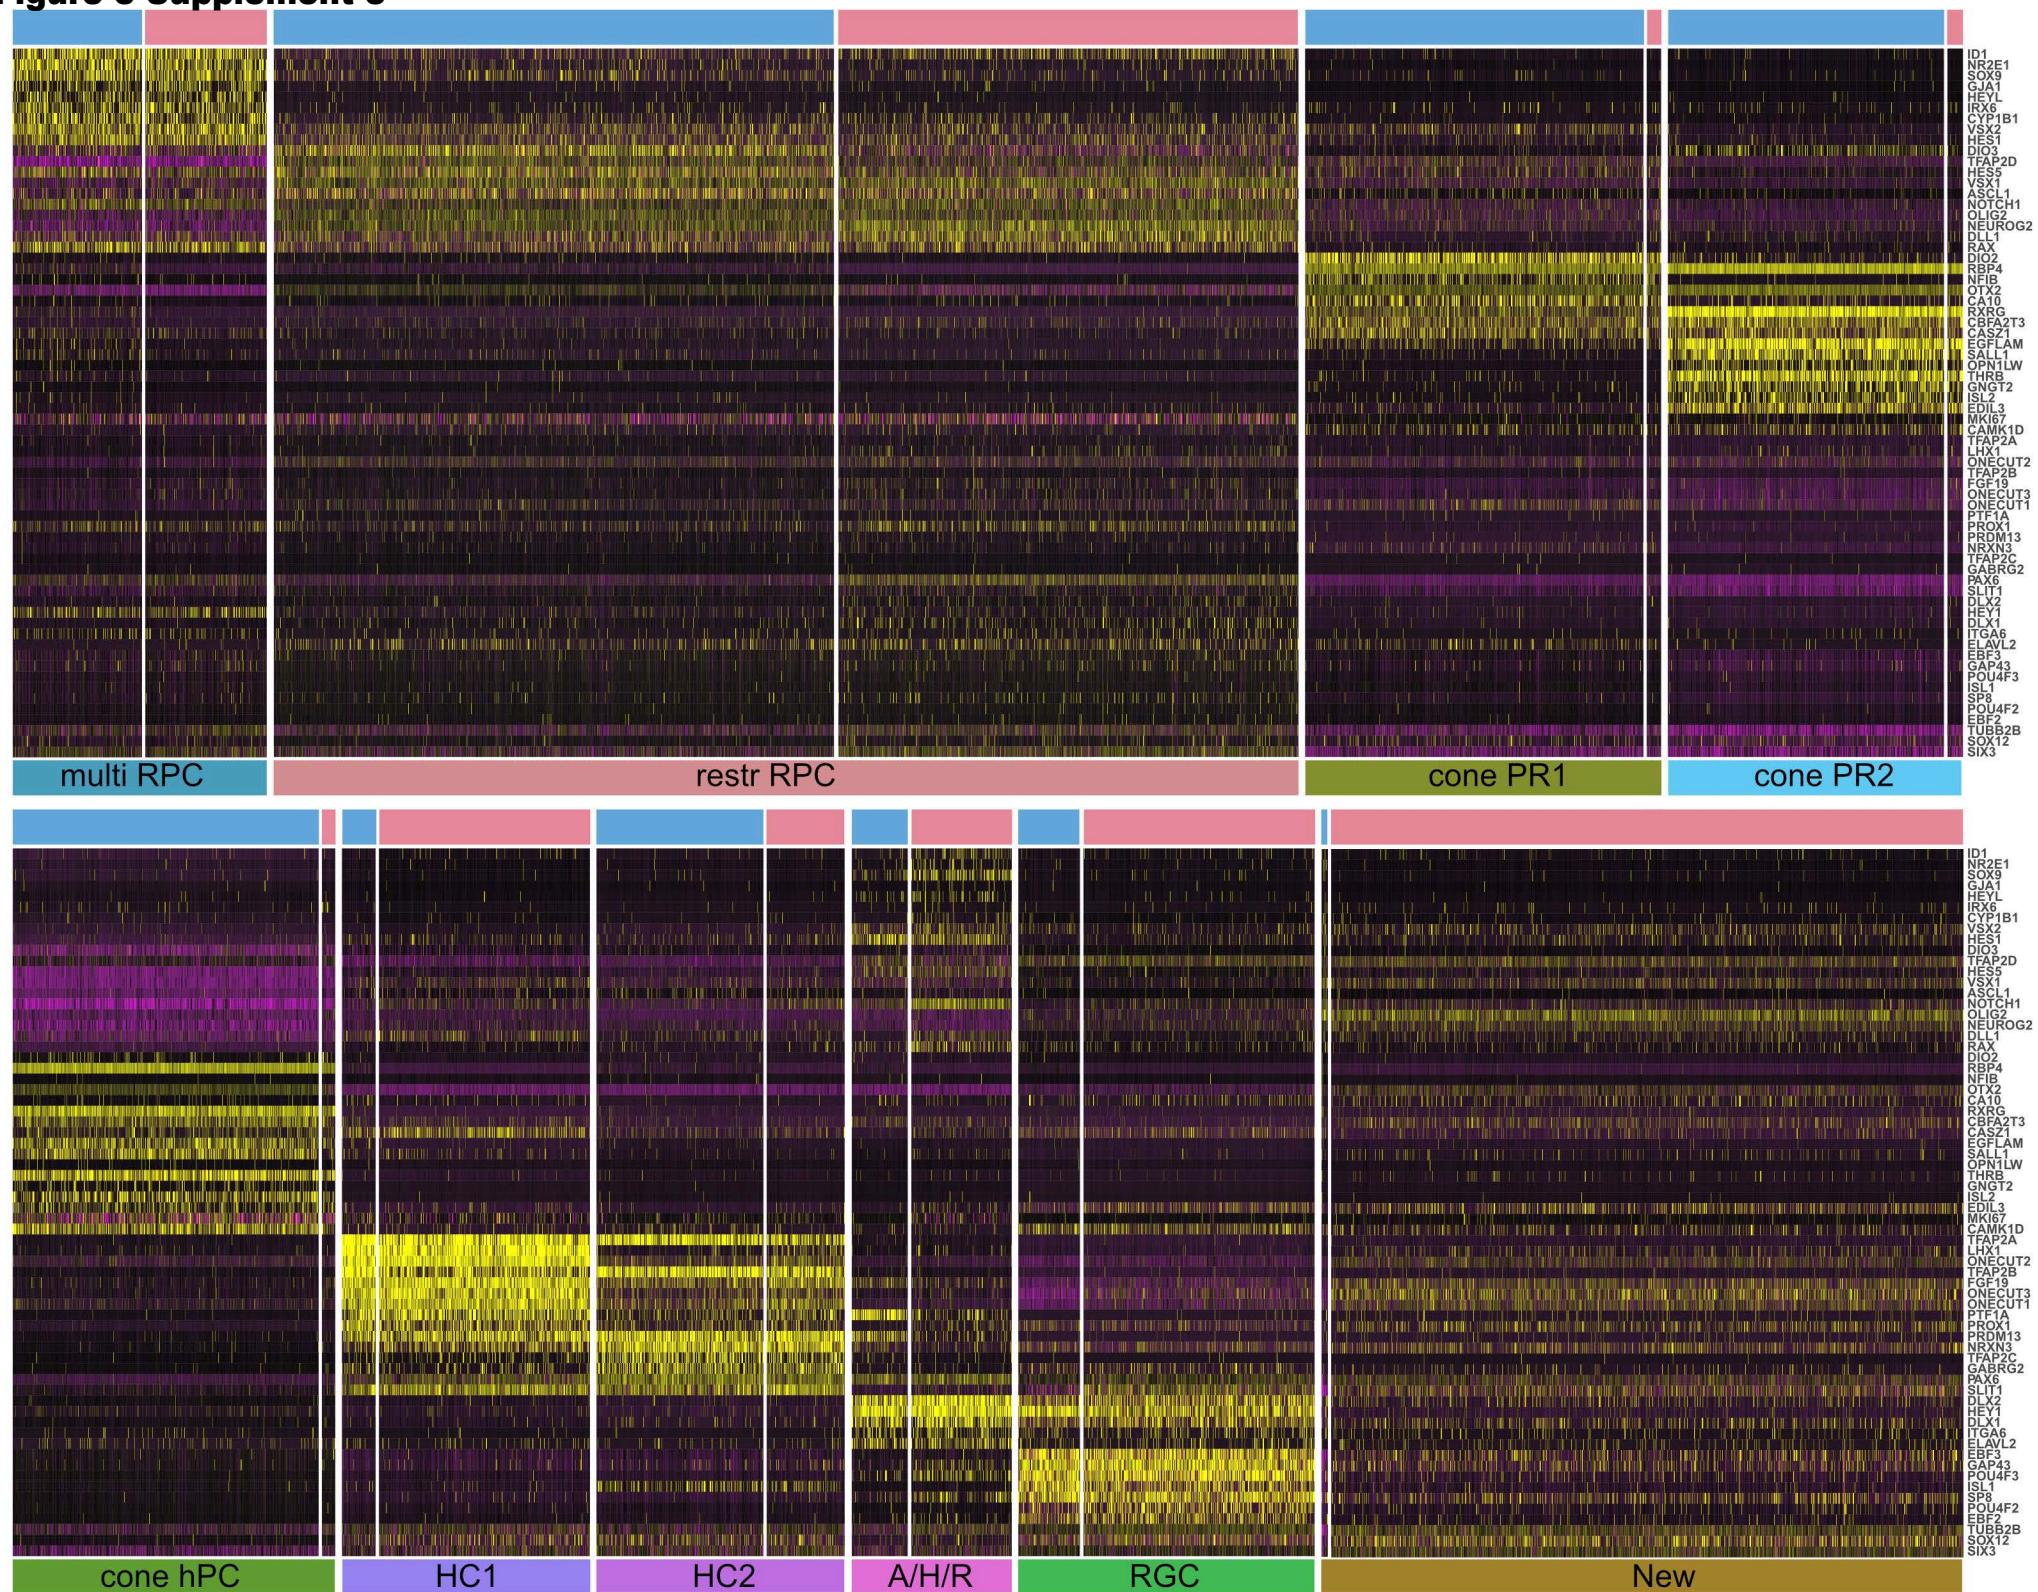

Supplement: supp [file elife-54279-supp-v1.zip]

Figure 5 Supplement 1

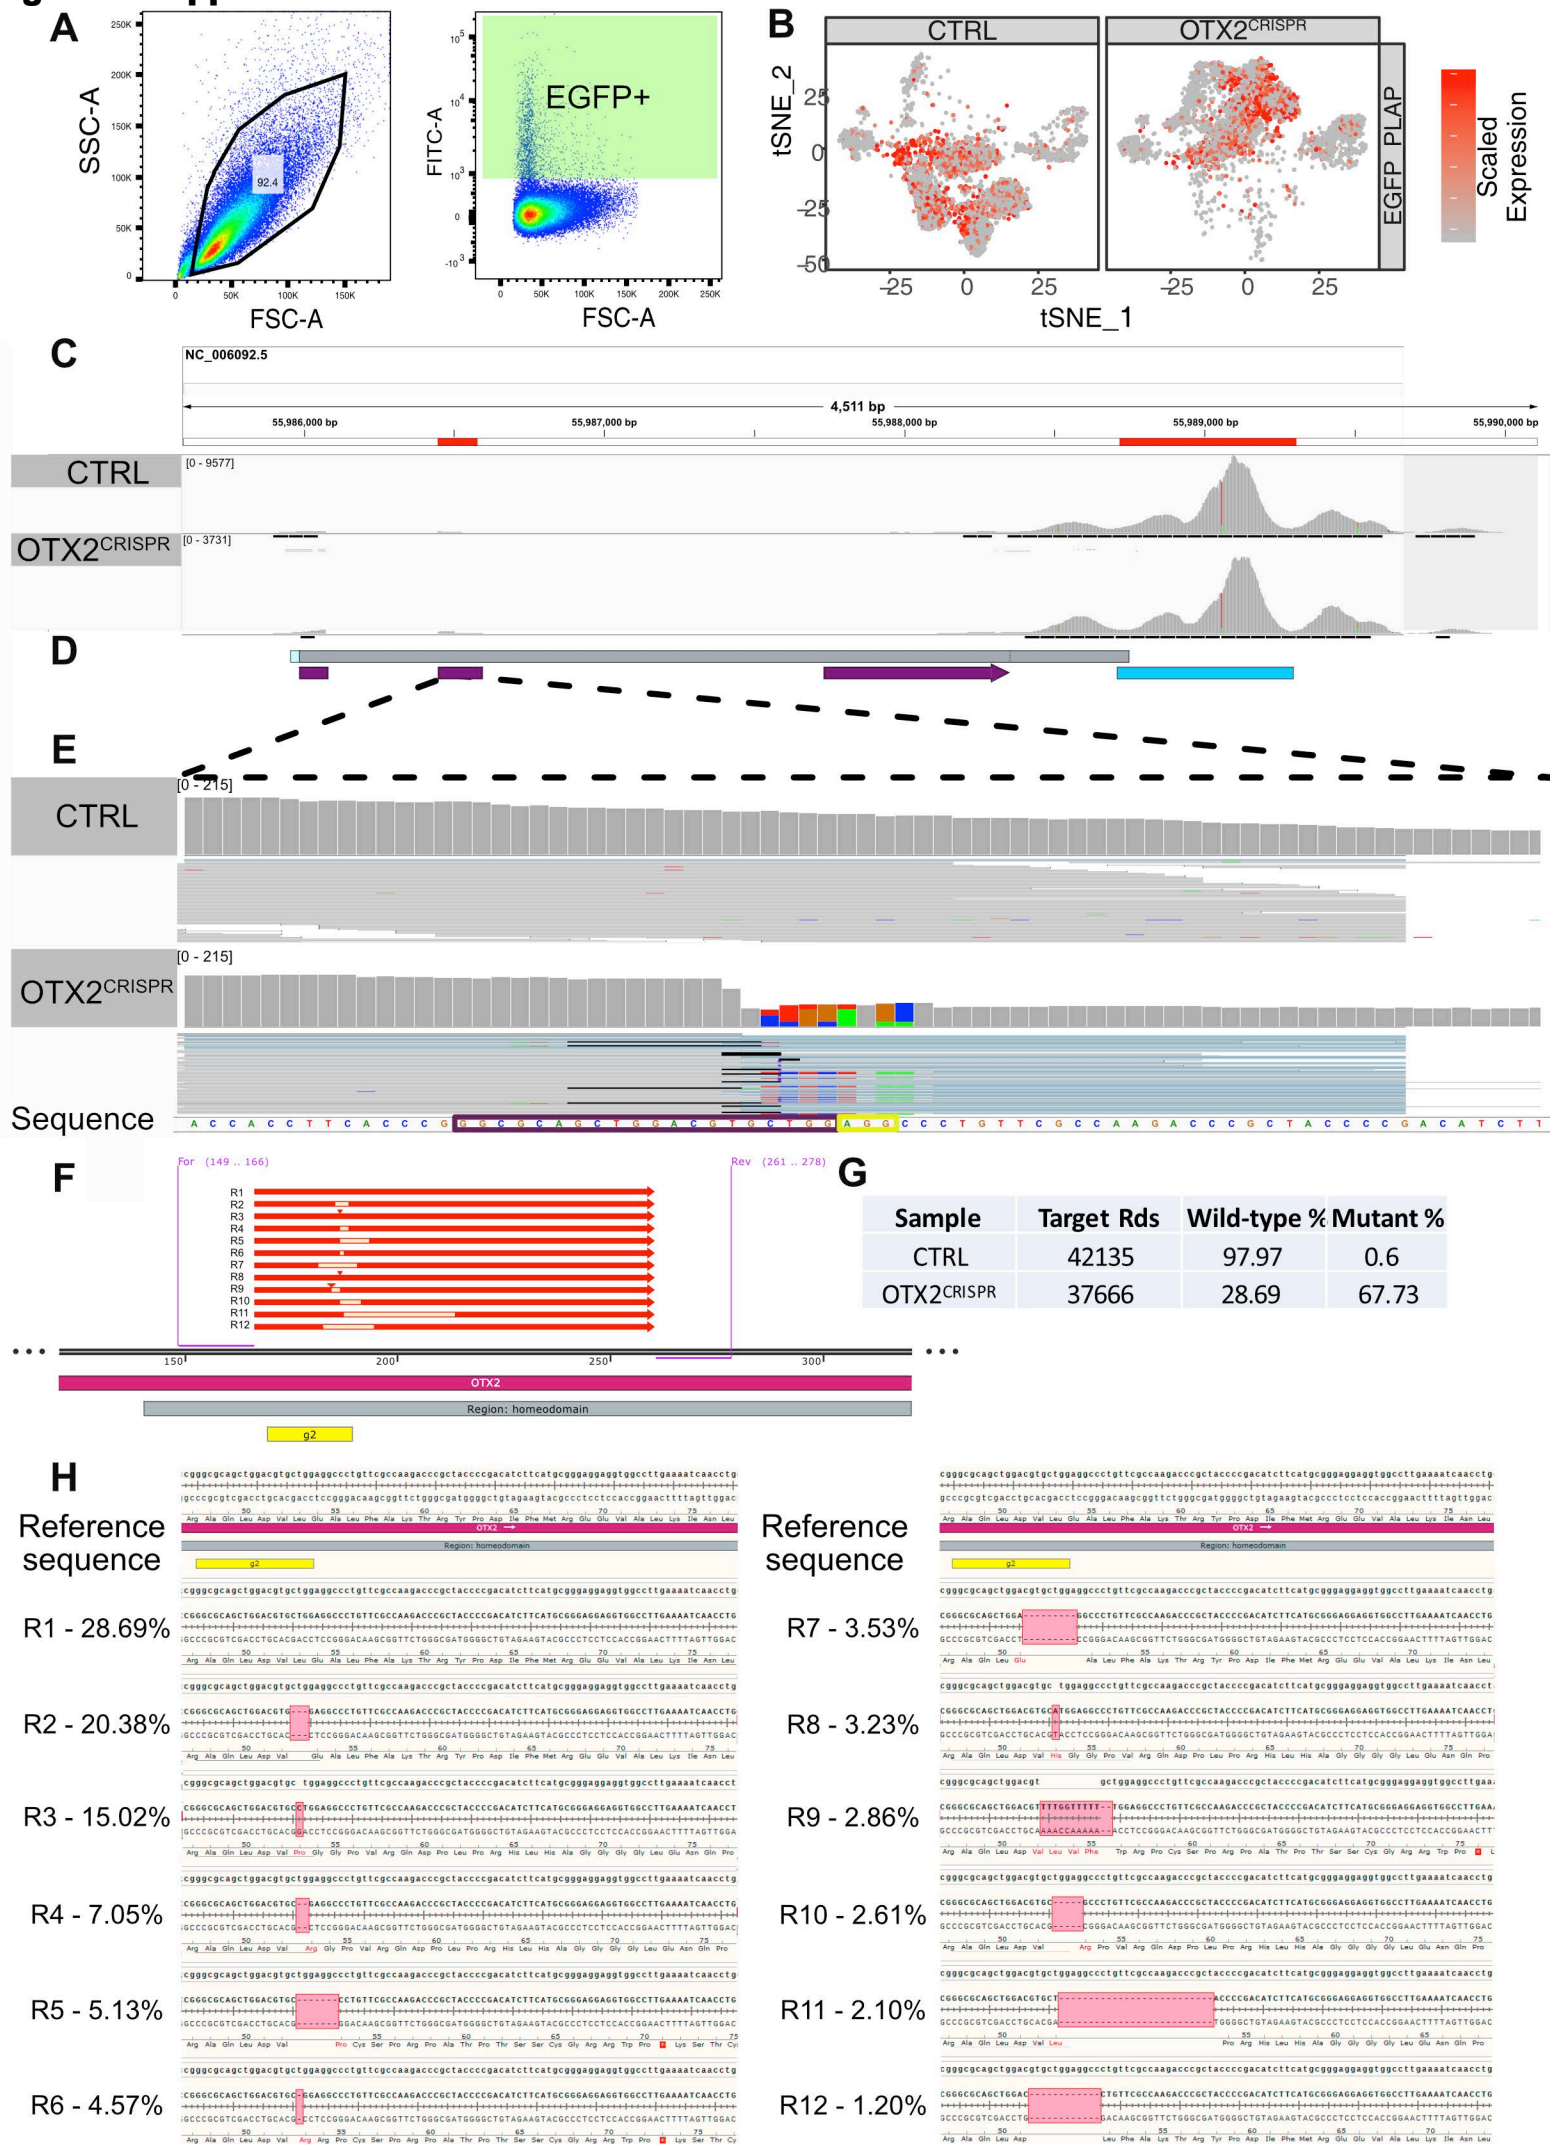

Supplement: supp [file elife-54279-supp-v1.zip]
